# Supplementary material for: High density rural settlements, parenting behavior and child disability are significant factors associated with tungiasis in Karamoja, northeastern Uganda: a case control study
Source: Research Square preprint supplement (doi:10.21203/rs.3.rs-7288997/v1), 2025-08-20
Supplement: Supplementary file 2 [file 3b24c3340a8f7d260ad638ce.xlsx]

## Sheet: cover
High density rural settlements, parenting behavior and child disability are significant factors associated with the high prevalence of tungiasis in Karamoja, northeastern Uganda: a case control study.
Lynne Elson1,2, Abneel K. Matharu3, Berrick Otieno4, Herman Feldmeier5, Charles Waiswa6, Amina Abubakar4, Jürgen Krücken7,8, Ulrike Fillinger4, Francis Mutebi6 *
1 KEMRI-Wellcome Trust Research Programme, Kilifi, Kenya
2 Centre for Tropical Medicine and Global Health, Nuffield Department of Medicine, University of Oxford, Oxford, United Kingdom.
3 International Centre of Insect Physiology and Ecology (ICIPE), Human Health Theme, Nairobi, Kenya
4 Institute for Human Development, Aga Khan University, Nairobi, Kenya
5Institute of Microbiology, Infectious Diseases and Immunology, Charité University Medicine, Berlin, Germany
6 College of Veterinary Medicine, Animal Resources and Biosecurity, Makerere University, Kampala, Uganda
7 Institute for Parasitology and Tropical Veterinary Medicine, Freie Universität Berlin, Berlin, Germany
8 Veterinary Centre for Resistance Research, Freie Universität Berlin, Berlin, Germany
*Correspondence
francis.mutebi@mak.ac.ug

## Sheet: description
Project Name	Ecology of tungiasis
File Name	Elson Karamoja children aged 8 to 14 years foot exams dataset
Description	Data collected January to March 2022 during interviews of caregivers in Karamoja, Uganda
number of variables	62
number of observations	1619
size of dataset	476 kb

## Sheet: data
Pupil_id	sub_county_id	parish_code	name_village	village_id	manyatta	in_manyatta	age	sex	muac	weight	height	weight_for_age	height_for_age	bmi	bmi_for_age	wasted	stunted	oth_skn_inf	name_oth_skin_inf___1	name_oth_skin_inf___2	name_oth_skin_inf___3	name_oth_skin_inf___4	name_oth_skin_inf___5	name_oth_skin_inf___6	name_oth_skin_inf___7	sp_oth_skin_nf	floor_child_sleep	oth_inf_hh	scr_fleas_hand	no_fleas_hds	scr_tunga_feet	total_live	total_dead	total_manip	total_clusters	total_pskin	total_cracks	total_ulcers	total abscess	total_hskin	total_tsnails	total_def_nails	total_lost_nails	total_infrared	total_fleas_recalc	cluster score	infection intensity	total_acute	total_chronic
NA_001_001	4	2	Lobei	1	Lore Nakaao	1	9	0	16.9	25.1	136	-0.86129	0.544263	25.1	2.66708	0	0	0	0	0	0	0	0	0	0		2	1	0		1	5	7	18	0	2	2	0	0	1	1	1	1	1	30	0	30	4	4
NA_001_002	4	2	Lobei	1	Lore Nakaao	1	9	0	16.2	24.3	134	-1.07401	0.201958	24.3	2.51348	0	0	0	0	0	0	0	0	0	0		1	1	1	8	1	23	17	13	3	12	3	0	1	4	1	6	1	5	53	15	68	16	12
NA_001_003	4	2	Lobei	1	Lore Nakaao	1	8	1	15.9	24.7	134	-0.259298	1.12286	24.7	3.15286	0	0	0	0	0	0	0	0	0	0		1	1	0		1	1	3	12	0	18	9	1	0	3	1	4	2	0	16	0	16	28	10
NA_001_005	4	2	Lobei	1	Lore Nakaao	1	8	0	15.3	19.5	121	-1.95055	-1.1584	19.5	1.50403	0	0	0	0	0	0	0	0	0	0		1	0	0		1	0	3	2	0	7	5	0	0	3	1	7	0	0	5	0	5	12	11
NA_001_006	4	2	Lobei	1	Lore Nakaao	1	9	0	14.6	20.1	124	-2.43492	-1.50956	20.1	1.46553	1	0	0	0	0	0	0	0	0	0		1	1	1	13	1	55	16	14	5	18	12	2	0	7	8	10	1	7	85	25	110	32	26
NA_001_007	4	2	Lobei	1	Lore Nakaao	1		0	17.5	20.8	111			20.8		0	0	1	0	0	0	0	0	1	0		1	1	0		1	1	1	7	0	7	8	1	0	4	2	5	0	0	9	0	9	16	11
NA_001_008	4	2	Lobei	1	Lore Nakaao	1	9	1	15.2	26	140	-0.594534	1.15882	26	3.07248	0	0	1	0	0	0	0	0	0	1	Fungal infection	1	1	1	6	1	24	51	30	11	9	1	0	0	0	0	5	1	2	105	55	160	10	6
NA_001_009	4	2	Lobei	1	Lore Nakaao	1	9	1	15.9	24.9	121	-0.908395	-2.1176	24.9	2.89559	0	1	0	0	0	0	0	0	0	0		1	1	0		1	11	7	33	4	13	11	4	1	11	3	8	2	4	51	20	71	29	24
NA_001_010	4	2	Lobei	1	Lore Nakaao	1	9	1	14.5	19.1	122	-3.19458	-1.94516	19.1	1.43719	2	0	1	0	0	0	0	0	0	1	Dandruff	1	0	0		1	4	13	33	0	8	4	2	1	4	3	3	1	7	50	0	50	15	11
NA_001_012	4	2	Lobei	1	Lore Nakaao	1	8	1	16.1	22.1	120	-1.10032	-1.43324	22.1	2.595	0	0	1	0	0	0	0	0	1	0		1	1	1	7	1	23	23	15	3	16	4	1	1	3	0	7	2	7	61	15	76	22	12
NA_001_013	4	2	Lobei	1	Lore Nakaao	1	9	1	16.9	24.5	131	-1.02984	-0.39317	24.5	2.82559	0	0	0	0	0	0	0	0	0	0		1	1	1	4	1	7	1	12	0	7	5	0	1	1	2	5	0	1	20	0	20	13	8
NA_001_014	4	2	Lobei	1	Lore Nakaao	1	8	1	10.2	9.6	97			9.6		0	0	0	0	0	0	0	0	0	0		1	1	1	30	1	18	59	20	14	11	12	3	2	5	1	9	0	12	97	70	167	28	15
NA_001_015	4	2	Lobei	1	Lore amoses	1	8	1	15.8	19.6	125	-2.12002	-0.520349	19.6	1.85181	1	0	0	0	0	0	0	0	0	0		1	1	1	8	1	11	40	16	1	16	7	5	1	7	6	6	4		67	5	72	29	23
NA_001_016	4	2	Lobei	1	Lore amoses	1	9	0	17.4	27.6	140	-0.268032	1.22887	27.6	3.08055	0	0	0	0	0	0	0	0	0	0		1	0	1	1	1	6	11	21	0	15	5	1	0	3	0	6	1	1	38	0	38	21	10
NA_001_017	4	2	Lobei	1	Lore amoses	1	11	0	18.5	29.6	150	-1.10003	0.852651	29.6	2.96716	0	0	0	0	0	0	0	0	0	0		1	1	0		1	0	1	7	1	4	2	0	0	4	2	3	2	0	8	5	13	6	11
NA_001_018	4	2	Lobei	1	Lore amoses	1	8	0	16.3	21.6	124	-1.19584	-0.61026	21.6	2.13665	0	0	0	0	0	0	0	0	0	0		1	0	0		1	1	2	5	0	17	5	1	0	0	0	1	0	0	8	0	8	23	1
NA_001_019	4	2	Lobei	1	Lore amoses	1	8	0	16.5	23.8	135	-0.534257	1.39958	23.8	2.66134	0	0	0	0	0	0	0	0	0	0		1	1	0		1	0	0	8	0	7	3	0	0	0	2	2	0	0	8	0	8	10	4
NA_001_020	4	2	Lobei	1	Lore ke etireng	1	10	0	18.2	25.6	130	-1.3989	-1.32587	25.6	2.53937	0	0	1	0	0	0	0	0	0	1	Dandruff	1	1	0		1	0	0	3	0	2	1	0	0	1	0	0	0	0	3	0	3	3	1
NA_001_022	4	2	Lobei	1	Lore amoses	1	13	1	17.7	32.4	152	-1.69275	-0.353148	32.4	3.15028	0	0	1	0	0	0	0	0	1	0		1	0	0		1	2	3	9	0	15	6	0	0	1	0	0	0	0	14	0	14	21	1
NA_001_023	4	2	Lobei	1	Lore Alorot	1	12	0	16.9	27.9	146	-2.11442	-0.528008	27.9	2.56054	1	0	0	0	0	0	0	0	0	0		1	0	0		1	0	0	7	0	12	1	0	0	0	1	2	3	0	7	0	7	13	6
NA_001_024	4	2	Lobei	1	Lore amoses	1	12	1	19.2	38	157	-0.0181427	1.20125	38	3.64762	0	0	1	0	0	0	0	0	0	1	Multiple skin wounds	1	1	0		1	9	11	59	0	16	4	1	1	7	8	9	0		79	0	79	22	24
NA_001_025	4	2	Lobei	1			8	0	18.5	27.9	143	0.446159	2.86128	27.9	3.38616	0	0	0	0	0	0	0	0	0	0		1	0	0		1	19	8	24	1	14	10	5	0	5	0	4	4	0	51	5	56	29	13
NA_001_026	4	2	Lobei	1	Lore Kaabura	1	10	0	19.4	36.5	155	0.644288	2.60613	36.5	3.82976	0	0	0	0	0	0	0	0	0	0		1	1	0		1	0	3	38	0	12	3	1	1	4	3	3	1		41	0	41	17	11
NA_001_027	4	2	Lobei	1	Lore Alorot	1	8	1	15.5	20.4	123	-1.76645	-0.885506	20.4	2.1177	0	0	0	0	0	0	0	0	0	0		1	1	0		1	0	0	13	0	7	6	1	0	5	2	1	0		13	0	13	14	8
NA_001_028	4	2	Lobei	1	Lore Alorot	1	9	0	16.9	27.2	142	-0.356397	1.57118	27.2	3.02037	0	0	0	0	0	0	0	0	0	0		1	1	1	7	1	33	10	32	9	15	10	1	1	10	2	2	3		75	45	120	27	17
NA_001_029	4	2	Lobei	1	Lore Alorot	1	8	0	16.5	26.9	139	0.231759	2.13043	26.9	3.23313	0	0	0	0	0	0	0	0	0	0		1	1	0		1	1	0	7	0	5	1	0	0	4	3	7	1		8	0	8	6	15
NA_001_031	4	2	Lobei	1	Lore Alorot	1	9	0	16.7	22.3	132	-1.66496	-0.140346	22.3	2.07217	0	0	0	0	0	0	0	0	0	0		1	1	1	10	1	5	0	28	1	11	9	5	1	9	0	5	4		33	5	38	26	18
NA_001_032	4	2	Lobei	1	Lore Alorot	1	8	1	13.6	20.9	127	-1.55926	-0.155192	20.9	2.26948	0	0	0	0	0	0	0	0	0	0		1	1	1	5	1	10	1	7	2	11	5	2	0	3	0	3	7		18	10	28	18	13
NA_001_033	4	2	Lobei	1	Lore Kaabura	1	10	1	17.3	24.5	133	-1.73182	-0.871708	24.5	2.59267	0	0	0	0	0	0	0	0	0	0		1	1	0		1	1	2	3	0	5	1	0	0	3	1	6	1		6	0	6	6	11
NA_001_034	4	2	Lobei	1	Lore Kaabura	1	10	1	17.3	26.1	133	-1.24184	-0.871708	26.1	2.85349	0	0	1	0	0	0	0	0	1	0		1	1	0		1	6	1	32	2	12	6	3	0	5	4	6	6		39	10	49	21	21
NA_001_035	4	2	Lobei	1	Lore Kiyonga	1	9	0	16.6	24.5	135	-1.01967	0.373111	24.5	2.55298	0	0	0	0	0	0	0	0	0	0		1	1	0		1	34	5	26	1	18	9	2	1	2	0	8	0	0	65	5	70	30	10
NA_001_037	4	2	Lobei	1	Lore Alokee	1	8	1	16.3	24.3	133	-0.376944	0.94028	24.3	3.07786	0	0	0	0	0	0	0	0	0	0		1	1	1	2	1	1	0	18	2	12	8	0	0	6	1	5	0		19	10	29	20	12
NA_001_038	4	2	Lobei	1	Lore Alokee	1	10	0	19.2	32.7	146	0.0662602	1.19061	32.7	3.49315	0	0	0	0	0	0	0	0	0	0		1	1	0		1	0	8	12	0	9	1	0	0	2	0	3	0		20	0	20	10	5
NA_001_039	4	2	Lobei	1	Lore Loumo	1	13	0	21	40.1	160	-0.715496	0.681235	40.1	3.75776	0	0	1	0	0	0	0	0	0	1	Wounds	1	0	0		1	6	17	20	0	13	5	0	0	1	1	1	0	0	43	0	43	18	3
NA_001_040	4	2	Lobei	1	Lore leese	1	8	1	13.6	20.6	129	-1.68236	0.209966	20.6	2.17966	0	0	0	0	0	0	0	0	0	0		1	1	1	13	1	14	4	31	4	17	4	0	1	2	0	9	2	1	49	20	69	22	13
NA_001_041	4	2	Lobei	1	Lore Alokee	1	8	1	14.6	27.5	124	0.468174	-0.702927	27.5	3.59433	0	0	0	0	0	0	0	0	0	0		1	1	1	5	1	17	12	14	2	16	1	1	1	7	1	9	1		43	10	53	19	18
NA_001_042	4	2	Lobei	1	Lore Alokee	1	12	1	20.4	42.3	155	0.562522	0.923185	42.3	3.85653	0	0	0	0	0	0	0	0	0	0		1	1	0		1	1	1	5	0	2	0	0	0	0	0	0	6		7	0	7	2	6
NA_001_043	4	2	Lobei	1	Lore Alokee	1	13	1	16.6	29	146	-2.43973	-1.11809	29	2.77287	1	0	0	0	0	0	0	0	0	0		1	1	0		1	1	0	29	0	11	0	2	0	0	0	3	0		30	0	30	13	3
NA_002_045	4	2	Loroo	2	Lore Alorengeluka	1	12	1	19.3	29.5	133	-1.61973	-2.13556	29.5	2.96045	0	1	1	1	0	0	0	0	0	0		1	1	0		1	1	0	0	0	0	0	0	0	0	0	0	0	1	1	0	1	0	0
NA_002_046	4	2	Loroo	2	Lore Aichumar	1	11	1	18.6	29.5	142	-1.01188	-0.20603	29.5	3.10158	0	0	1	0	1	0	0	0	0	0		1	1	0		1	0	0	8	0	9	1	0	0	0	0	2	0	0	8	0	8	10	2
NA_002_047	4	2	Loroo	2	Lore Kaaguma	1	10	1	18.4	28.9	156	-0.520677	2.84801	28.9	3.21424	0	0	1	1	0	0	0	0	0	0		1	1	1	1	1	0	4	11	0	10	1	0	0	5	6	7	0	2	15	0	15	11	18
NA_002_048	4	2	Loroo	2	Lore Aichumar	1	10	0	19.3	27.6	139	-0.920668	0.0896507	27.6	2.86639	0	0	0	0	0	0	0	0	0	0		1	1	0		1	0	0	2	0	5	0	0	1	2	0	2	1	2	2	0	2	6	5
NA_002_049	4	2	Loroo	2	Lore Kaaguma	1	10	0	19.4	29.5	146	-0.518643	1.19061	29.5	3.12956	0	0	0	0	0	0	0	0	0	0		1	0	0		1	0	0	4	0	10	1	0	0	2	0	8	0	0	4	0	4	11	10
NA_002_050	4	2	Loroo	2	Lore Aichumar	1	9	1	16	20.3	122	-2.60923	-1.94516	20.3	1.83831	1	0	0	0	0	0	0	0	0	0		1	0	0		1	1	4	0	0	2	0	0	0	0	4	1	0	2	5	0	5	2	5
NA_002_051	4	2	Loroo	2	Lore Kaaguma	1	13	1	18.5	31.3	164	-1.92019	1.17673	31.3	3.04044	0	0	0	0	0	0	0	0	0	0		1	1	0		1	0	6	23	0	15	2	0	0	4	9	8	0	1	29	0	29	17	21
NA_002_052	4	2	Loroo	2	Lore Aichumar	1	14	1	20.5	35.5	151	-1.87074	-1.36924	35.5	3.34242	0	0	0	0	0	0	0	0	0	0		1	1	0		1	0	1	8	0	8	3	1	1	3	8	6	1	0	9	0	9	13	18
NA_002_053	4	2	Loroo	2	Lore Alolem	1	10	0	16.3	19.9	119	-3.20402	-3.05595	19.9	1.17048	2	2	0	0	0	0	0	0	0	0		1	1	0		1	0	1	1	0	0	0	0	0	0	0	0	1	2	2	0	2	0	1
NA_002_054	4	2	Loroo	2	Lore Aichumar	1	9	0	17.5	23	128	-1.4477	-0.824955	23	2.23689	0	0	0	0	0	0	0	0	0	0		1	1	0		1	3	0	1	0	0	0	0	0	0	0	0	0	2	4	0	4	0	0
NA_002_055	4	2	Loroo	2	Lore Alorengeluka	1	10	1	16.8	21.9	130	-2.68892	-1.35689	21.9	2.04762	1	0	0	0	0	0	0	0	0	0		1	0	0		1	0	1	3	0	0	0	0	1	1	8	9	0	0	4	0	4	1	18
NA_002_056	4	2	Loroo	2	Lore Aichumar	1	10	1	16.8	20.4	117	-3.35795	-3.45934	20.4	1.63946	2	2	0	0	0	0	0	0	0	0		1	1	0		1	0	6	11	0	14	1	0	0	1	0	0	0	3	17	0	17	15	1
NA_002_057	4	2	Loroo	2	Lore Kaaguma	1	12	0	23.5	41.4	166	0.140194	2.28055	41.4	3.92419	0	0	0	0	0	0	0	0	0	0		1	0	0		1	0	1	4	0	2	0	0	0	0	0	0	0	0	5	0	5	2	0
NA_002_058	4	2	Loroo	2	Lore Kaaguma	1	9	1	16.6	24.8	137	-0.938373	0.641489	24.8	2.87839	0	0	1	0	1	0	0	0	0	0		1	1	1	25	1	13	6	3	4	15	2	0	0	5	0	6	1	1	22	20	42	17	12
NA_002_060	4	2	Loroo	2	Lore Aichumar	1	8	0	12.5	21.5	99	-1.22878		21.5	2.10979	0	0	1	0	0	0	0	0	0	1	Wounds on left ear and big wound on the left foot	1	1	0		1	3	0	3	0	5	0	3	2	0	1	5	0	2	6	0	6	10	6
NA_002_062	4	2	Loroo	2	Lore Kaaguma	1	8	0	18.4	20	126	-1.75802	-0.244834	20	1.66882	0	0	1	0	0	0	0	0	0	1	Skin is scaling	1	1	0		1	3	1	6	0	12	5	0	0	0	0	7	0	0	10	0	10	17	7
NA_002_064	4	2	Loroo	2	Lore Kaalem	1	10	0	10.9	25.9	131	-1.32311	-1.16859	25.9	2.5922	0	0	0	0	0	0	0	0	0	0		1	0	0		1	1	5	7	0	6	3	0	0	3	6	7	1	5	13	0	13	9	17
NA_002_065	4	2	Loroo	2	Lore Kaalem	1	8	0	18.8	23.3	133	-0.674784	1.03415	23.3	2.55226	0	0	1	1	0	0	0	0	1	0		1	1	1	1	1	8	25	9	3	14	9	4	0	11	9	3	6	3	42	15	57	27	29
NA_002_066	4	2	Loroo	2	Lore Alotukei	1	10	0	16.2	22.2	133	-2.37954	-0.854029	22.2	1.8219	1	0	1	0	1	0	0	0	0	0		1	1	0		1	0	0	2	0	2	0	0	0	0	0	3	0	0	2	0	2	2	3
NA_002_067	4	2	Loroo	2	Lore Alotukei	1	11	1	19	32	149	-0.473848	0.846681	32	3.34277	0	0	0	0	0	0	0	0	0	0		1	0	0		1	0	1	4	0	6	1	0	0	0	0	6	1	3	5	0	5	7	7
NA_002_068	4	2	Loroo	2	Lore Alotukei	1	10	1	16.2	24.3	134	-1.79783	-0.709981	24.3	2.55657	0	0	0	0	0	0	0	0	0	0		1	1	1	17	1	22	27	14	5	18	12	10	4	8	8	9	1	11	63	25	88	44	26
NA_002_069	4	2	Loroo	2	Lore Alotukei	1	11	1	18.8	31.2	142	-0.636553	-0.20603	31.2	3.27153	0	0	0	0	0	0	0	0	0	0		1	1	0		1	3	0	7	0	13	1	0	0	0	4	1	0	0	10	0	10	14	5
NA_002_070	4	2	Loroo	2	Lore Alotukei	1	9	0	16.5	22.1	132	-1.72928	-0.140346	22.1	2.02285	0	0	0	0	0	0	0	0	0	0		1	1	0		1	0	8	0	0	11	1	0	0	4	1	2	0	0	8	0	8	12	7
NA_002_071	4	2	Loroo	2	Lore Alotukei	1	11	1	17	28.9	147	-1.15499	0.545906	28.9	3.03473	0	0	1	1	0	0	0	0	0	0		1	0	0		1	8	1	1	1	9	0	0	0	1	0	6	0	2	10	5	15	9	7
NA_002_072	4	2	Loroo	2	Lore Alotukei	1	11	1	17.9	32.1	152	-0.454085	1.29784	32.1	3.35133	0	0	0	0	0	0	0	0	0	0		1	0	0		1	2	1	5	0	9	2	0	0	0	0	9	0	1	8	0	8	11	9
NA_002_073	4	2	Loroo	2	Lore Alotukei	1	12	0	19.7	38.5	165	-0.247261	2.14012	38.5	3.72286	0	0	0	0	0	0	0	0	0	0		1	1	0		1	1	0	5	0	4	0	1	1	0	0	2	0	0	6	0	6	6	2
NA_002_074	4	2	Loroo	2	Lore Kaalem	1	12	0	23.8	41.6	154	0.165492	0.595415	41.6	3.93689	0	0	1	1	0	0	0	0	0	0		1	1	0		1	0	0	2	0	0	0	1	0	0	0	0	0	1	2	0	2	1	0
NA_002_075	4	2	Loroo	2	Lore Alorengeluka	1	10	0	18.7	30.5	145	-0.324508	1.03333	30.5	3.25279	0	0	0	0	0	0	0	0	0	0		1	1	0		1	0	0	3	0	8	0	0	0	2	0	5	1	0	3	0	3	8	8
NA_002_076	4	2	Loroo	2	Lore Aichumar	1	12	0	17.9	28.5	142	-1.98314	-1.08972	28.5	2.65327	0	0	0	0	0	0	0	0	0	0		1	1	0		1	0	0	2	0	2	0	1	0	1	2	6	1	1	2	0	2	3	10
NA_002_077	4	2	Loroo	2	Lore Aichumar	1	10	0	16.8	28.9	130	-0.640667	-1.32587	28.9	3.05082	0	0	0	0	0	0	0	0	0	0		1	1	0		1	1	0	5	0	9	0	0	0	3	4	9	0	0	6	0	6	9	16
NA_002_078	4	2	Loroo	2	Lore Kaalem	1	9	0	17.1	21.9	127	-1.79466	-0.996107	21.9	1.97247	0	0	1	0	1	0	0	0	0	0		1	1	0		1	0	1	2	0	9	4	1	0	0	0	3	0	0	3	0	3	14	3
NA_002_079	4	2	Loroo	2	Lore Aloduk	1	8	0	14.8	19	123	-2.15212	-0.792973	19	1.32903	1	0	0	0	0	0	0	0	0	0		1	1	1	3	1	19	29	13	2	15	5	4	4	8	10	8	2	12	61	10	71	28	28
NA_002_080	4	2	Loroo	2	Lore Kaalem	1	10	1	16.1	19.9	120	-3.6045	-2.97416	19.9	1.48354	2	1	1	0	1	0	0	0	0	1	Wounds	1	1	0		1	1	0	2	0	8	1	0	0	0	1	5	0	0	3	0	3	9	6
NA_002_081	4	2	Loroo	2	Lore Kaalem	1	10	0	14.9	19	125	-3.57306	-2.11227	19	0.86478	2	1	1	0	1	0	0	0	0	0		1	1	0		1	5	3	3	1	15	1	0	0	4	0	6	0	1	11	5	16	16	10
NA_002_082	4	2	Loroo	2	Lore Kaalem	1	8	0	15	19.9	123	-1.79584	-0.792973	19.9	1.63663	0	0	0	0	0	0	0	0	0	0		1	1	0		1	1	14	8	0	9	4	0	0	3	10	9	0	2	23	0	23	13	22
NA_002_083	4	2	Loroo	2	Lore Aichumar	1	10	1	16.7	26.5	135	-1.12902	-0.548254	26.5	2.91176	0	0	0	0	0	0	0	0	0	0		1	0	0		1	0	0	3	0	3	3	0	0	1	0	1	0	1	3	0	3	6	2
NA_002_084	4	2	Loroo	2	Lore Kaalem	1	8	1	16.4	19.6	117	-2.12002	-1.98098	19.6	1.85181	1	0	0	0	0	0	0	0	0	0		1	0	0		1	4	10	15	3	13	8	6	1	10	9	8	1	8	29	15	44	28	28
NA_002_085	4	2	Loroo	2	Lore Aichumar	1	10	0	17	23	125	-2.12638	-2.11227	23	2.01312	1	1	0	0	0	0	0	0	0	0		1	1	0		1	1	4	9	0	13	4	0	0	1	3	4	0	3	14	0	14	17	8
NA_002_086	4	2	Loroo	2	Lore Kaalem	1	10	1	15.9	24.5	132	-1.73182	-1.03343	24.5	2.59267	0	0	0	0	0	0	0	0	0	0		1	1	0		1	0	1	12	0	5	2	0	1	2	3	3	0	1	13	0	13	8	8
NA_002_087	4	2	Loroo	2	Lore Kaalem	1	10	0	17.2	26.5	146	-1.17599	1.19061	26.5	2.69367	0	0	0	0	0	0	0	0	0	0		1	1	0		1	0	1	5	0	3	0	2	0	2	9	5	3	1	6	0	6	5	19
NA_002_088	4	2	Loroo	2	Lore Aloduk	1	9	1	15.2	23.5	135	-1.35242	0.296602	23.5	2.63548	0	0	0	0	0	0	0	0	0	0		1	1	1	31	1	11	0	0	0	17	6	0	0	1	1	8	1	2	11	0	11	23	11
NA_002_089	4	2	Loroo	2	Lore Aloduk	1	12	0	17.6	17.4	147		-0.38758	17.4	-0.321428	0	0	0	0	0	0	0	0	0	0		1	1	0		1	0	4	12	3	9	4	2	0	4	9	7	3	1	16	15	31	15	23
NA_002_090	4	2	Loroo	2	Lore Alotukei	1	9	0	15.6	23.4	128	-1.32877	-0.824955	23.4	2.32584	0	0	0	0	0	0	0	0	0	0		1	1	0		1	1	0	6	0	6	3	0	0	0	1	7	0	1	7	0	7	9	8
NA_002_091	4	2	Loroo	2	Lore Kaalem	1	8	1	13.5	19	120	-2.40478	-1.43324	19	1.6314	1	0	0	0	0	0	0	0	0	0		1	1	1	41	1	10	20	26	13	16	12	10	0	8	10	8	1	17	56	65	121	38	27
NA_002_105	4	2	Loroo	2	Lore Kaaguma	1	8	0	15.2	19.4	124	-1.99012	-0.61026	19.4	1.46987	0	0	0	0	0	0	0	0	0	0		1	1	0		1	1	1	5	1	6	0	0	2	0	0	3	0	0	7	5	12	8	3
NA_002_107	4	2	Loroo	2	Lore Alolem	1	9	0	14.9	18	126	-3.32471	-1.16726	18	0.720852	2	0	0	0	0	0	0	0	0	0		1	1	0		1	4	1	6	2	7	3	3	0	3	1	5	1	3	11	10	21	13	10
NA_002_108	4	2	Loroo	2	Lore Alorengeluka	1	9	0	15.7	20.4	124	-2.32122	-1.50956	20.4	1.55734	1	0	0	0	0	0	0	0	0	0		1	1	0		1	1	0	0	0	7	4	0	1	0	0	7	1	0	1	0	1	12	8
NA_003_001	4	2	Naregei-Nakoreete	3	Lore Apokomol	1	9	0	16.8	24.1	129	-1.12915	-0.653803	24.1	2.4732	0	0	1	1	0	0	0	0	0	0		1	1	1	1	1	12	8	12	0	14	3	2	1	0	0	10	0	1	32	0	32	20	10
NA_003_002	4	2	Naregei-Nakoreete	3	Lore Apokomol	1	14	1	20.4	39.9	159	-1.17434	-0.404985	39.9	3.6469	0	0	0	0	0	0	0	0	0	0		1	0	0		1	0	0	29	0	12	1	2	0	4	7	8	1	0	29	0	29	15	20
NA_003_003	4	2	Naregei-Nakoreete	3	Lore Apokomol	1	10	1	17.1	31.1	144	-0.0491939	0.907288	31.1	3.43479	0	0	1	0	0	0	0	0	0	1	Wounds	1	1	0		1	0	2	8	0	8	2	0	0	4	6	8	1	1	10	0	10	10	19
NA_003_004	4	2	Naregei-Nakoreete	3	Lore Apokomol	1	12	1	16.5	25.9	139	-2.58764	-1.30136	25.9	2.46495	1	0	0	0	0	0	0	0	0	0		1	1	0		1	0	0	16	1	9	2	0	0	2	1	3	0	2	16	5	21	11	6
NA_003_005	4	2	Naregei-Nakoreete	3	Lore Apokomol	1	8	0	17.7	24.5	137	-0.346163	1.76501	24.5	2.80533	0	0	0	0	0	0	0	0	0	0		1	1	0		1	1	2	16	5	12	9	0	1	7	7	8	2	6	19	25	44	22	24
NA_003_006	4	2	Naregei-Nakoreete	3	Lore Kaaguma	1	10	0	19.5	35.6	164	0.517032	4.02165	35.6	3.75761	0	0	1	0	0	0	0	0	0	1	Wounds	1	1	0		1	0	0	19	0	14	5	0	0	5	4	4	1	0	19	0	19	19	14
NA_003_007	4	2	Naregei-Nakoreete	3	Lore Apokomol	1	8	0	18.3	23.3	127	-0.674784	-0.0621217	23.3	2.55226	0	0	0	0	0	0	0	0	0	0		1	1	0		1	0	0	1	0	0	0	0	0	0	0	0	0	1	1	0	1	0	0
NA_003_008	4	2	Naregei-Nakoreete	3	Lore Apokomol	1	10	0	17.7	29.9	145	-0.439645	1.03333	29.9	3.18001	0	0	0	0	0	0	0	0	0	0		1	1	0		1	0	0	21	0	9	5	1	0	7	8	9	0	0	21	0	21	15	24
NA_003_009	4	2	Naregei-Nakoreete	3	Lore Apokomol	1	8	1	15.2	22.1	129	-1.10032	0.209966	22.1	2.595	0	0	0	0	0	0	0	0	0	0		1	1	1	1	1	4	4	7	2	14	0	1	1	2	0	5	0	3	15	10	25	16	7
NA_003_010	4	2	Naregei-Nakoreete	3	Lore Kaaguma	1	13	1	16.7	29.4	117	-2.34472	-4.8153	29.4	2.82356	1	2	1	0	1	0	0	0	0	0		1	1	0		1	2	6	2	3	9	10	2	1	15	10	8	2	8	10	15	25	22	35
NA_003_011	4	2	Naregei-Nakoreete	3	Lore Kaaguma	1	10	1	17.4	34.1	121	0.491355	-2.81243	34.1	3.67231	0	1	0	0	0	0	0	0	0	0		1	1	0		1	1	5	11	0	13	5	0	0	7	10	10	0	5	17	0	17	18	27
NA_003_012	4	2	Naregei-Nakoreete	3	Lore Apokomol	1	12	0	16.3	24.3	117	-2.99574	-4.60042	24.3	1.89175	1	2	1	0	0	0	0	0	0	1	Wounds on the left leg	1	1	0		1	0	0	6	0	3	1	0	0	0	1	1	0	0	6	0	6	4	2
NA_003_013	4	2	Naregei-Nakoreete	3	Lore Apokomol	1	9	1	15.5	23.4	135	-1.38626	0.296602	23.4	2.61519	0	0	0	0	0	0	0	0	0	0		1	1	1	2	1	3	7	29	1	7	2	1	0	4	9	8	1	9	39	5	44	10	22
NA_003_014	4	2	Naregei-Nakoreete	3	Lore Kaaguma	1	9	1	14.7	23.4	110	-1.38626	-4.01448	23.4	2.61519	0	2	0	0	0	0	0	0	0	0		1	1	0		1	0	0	8	0	4	3	0	0	3	8	5	2	3	8	0	8	7	18
NA_003_015	4	2	Naregei-Nakoreete	3	Lore Kaaguma	1	8	1	14.4	18.2	108	-2.81374	-3.62418	18.2	1.30514	1	2	1	0	1	0	0	0	0	0		1	1	1	20	1	29	6	6	3	14	4	0	0	4	0	8	2	8	41	15	56	18	14
NA_003_016	4	2	Naregei-Nakoreete	3	Lore Apokomol	1	9	1	17	25.8	113	-0.649518	-3.49715	25.8	3.04191	0	2	0	0	0	0	0	0	0	0		1	1	1	2	1	0	10	20	2	13	7	6	1	11	6	7	0	2	30	10	40	27	24
NA_003_017	4	2	Naregei-Nakoreete	3	Lore Apokomol	1	13	1	18.1	33.7	117	-1.43939	-4.8153	33.7	3.26755	0	2	1	0	1	0	0	0	1	0		1	1	0		1	10	20	17	0	14	1	0	0	0	1	5	0	1	47	0	47	15	6
NA_003_018	4	2	Naregei-Nakoreete	3	Lore Apokomol	1	9	0	14	19	109	-2.87911	-4.07685	19	1.09956	1	2	0	0	0	0	0	0	0	0		1	1	1	31	1	29	32	41	1	18	2	2	0	3	7	7	2	8	102	5	107	22	19
NA_003_019	4	2	Naregei-Nakoreete	3	Lore Kaaguma	1	12	1	15.9	24.6	113	-3.00125	-4.91624	24.6	2.23453	2	2	0	0	0	0	0	0	0	0		1	1	0		1	0	0	2	1	2	1	0	0	2	9	8	2	7	2	5	7	3	21
NA_003_021	4	2	Naregei-Nakoreete	3	Lore Apokomol	1	11	0	14.6	20.4	108	-3.5722		20.4	1.09327	2	0	1	0	0	0	0	0	0	1	Hyperkeratosis	1	1	0		1	0	0	2	0	3	0	0	0	4	0	0	0	2	2	0	2	3	4
NA_003_022	4	2	Naregei-Nakoreete	3	Lore Kaaguma	1	13	0	19.6	40.9	122	-0.599085	-4.80328	40.9	3.81488	0	2	0	0	0	0	0	0	0	0		1	1	0		1	0	0	5	0	2	1	0	0	0	0	0	0	1	5	0	5	3	0
NA_003_023	4	2	Naregei-Nakoreete	3	Lore Kaaguma	1	10	0	18.8	32.1	199	-0.0357243		32.1	3.43141	0	0	0	0	0	0	0	0	0	0		1	1	0		1	1	4	6	0	15	2	0	0	4	0	8	3	2	11	0	11	17	15
NA_003_024	4	2	Naregei-Nakoreete	3	Lore Kaaguma	1	8	0	16	21.9	109	-1.09864	-3.35095	21.9	2.2155	0	2	0	0	0	0	0	0	0	0		1	1	0		1	0	0	6	0	2	0	0	0	0	0	2	0	0	6	0	6	2	2
NA_003_026	4	2	Naregei-Nakoreete	3	Lore Kaaguma	1	11	0	16.8	26.9	140	-1.6838	-0.597435	26.9	2.56986	0	0	1	0	1	0	0	0	0	0		1	1	0		1	0	6	2	0	10	2	0	0	4	0	5	4	0	8	0	8	12	13
NA_003_027	4	2	Naregei-Nakoreete	3	Lore Kaaguma	1	13	0	21.4	40.1	158	-0.715496	0.392576	40.1	3.75776	0	0	1	0	0	1	0	0	0	0		1	1	1	4	1	22	20	9	4	18	16	4	0	17	5	7	3	15	51	20	71	38	32
NA_003_028	4	2	Naregei-Nakoreete	3	Lore Apokomol	1	10	1	16.4	24.4	134	-1.76468	-0.709981	24.4	2.57473	0	0	0	0	0	0	0	0	0	0		1	1	1	8	1	1	25	16	3	12	1	0	1	7	9	9	0	7	42	15	57	14	25
NA_003_029	4	2	Naregei-Nakoreete	3	Lore Apokomol	1	13	0	20.2	40.4	165	-0.671496	1.40288	40.4	3.77948	0	0	0	0	0	0	0	0	0	0		1	1	0		1	0	1	10	0	1	0	0	0	0	0	1	0	0	11	0	11	1	1
NA_003_030	4	2	Naregei-Nakoreete	3	Lore Kaaguma	1	8	1	13.4	18.6	124	-2.60485	-0.702927	18.6	1.47321	1	0	1	0	1	0	0	0	0	0		1	1	1	7	1	36	18	4	6	16	9	1	0	5	2	10	0	13	58	30	88	26	17
NA_003_031	4	2	Naregei-Nakoreete	3	Lore Kaaguma	1	12	0	18.8	32.2	154	-1.25222	0.595415	32.2	3.13833	0	0	0	0	0	0	0	0	0	0		1	1	0		1	0	1	8	0	14	0	0	0	0	0	5	2	1	9	0	9	14	7
NA_003_032	4	2	Naregei-Nakoreete	3	Lore Apokomol	1	9	1	13.2	20.6	124	-2.47402	-1.60027	20.6	1.92831	1	0	1	0	0	0	0	0	0	1	Dandruff	1	1	1	5	1	5	27	7	5	16	12	1	0	15	10	8	2	13	39	25	64	29	35
NA_003_033	4	2	Naregei-Nakoreete	3	Lore Kaaguma	1	11	1	16.7	26.3	139	-1.8513	-0.657192	26.3	2.69354	0	0	1	0	1	0	0	0	0	0		1	1	1	6	1	21	34	19	3	15	0	2	0	1	0	6	1	7	74	15	89	17	8
NA_003_034	4	2	Naregei-Nakoreete	3	Lore Apokomol	1	9	1	13.9	19.5	138	-2.99109	0.813932	19.5	1.57875	1	0	0	0	0	0	0	0	0	0		1	1	1	2	1	11	22	49	3	14	2	1	0	9	10	8	2	10	82	15	97	17	29
NA_003_035	4	2	Naregei-Nakoreete	3	Lore Apokomol	1	10	1	17.3	29.2	143	-0.451994	0.745561	29.2	3.24713	0	0	0	0	0	0	0	0	0	0		1	1	1	2	1	0	1	8	4	13	2	0	0	6	10	6	4	7	9	20	29	15	26
NA_003_036	4	2	Naregei-Nakoreete	3	Lore Apokomol	1	10	1	15.7	24	137	-1.89901	-0.2248	24	2.50082	0	0	0	0	0	0	0	0	0	0		1	1	1	3	1	11	2	25	5	15	4	2	0	7	10	8	2	12	38	25	63	21	27
NA_003_037	4	2	Naregei-Nakoreete	3	Lore Apokomol	1	8	1	14.3	21.1	128	-1.47913	0.0273871	21.1	2.32738	0	0	0	0	0	0	0	0	0	0		1	1	1	2	1	0	8	25	2	10	5	1	1	5	9	7	2	7	33	10	43	17	23
NA_003_038	4	2	Naregei-Nakoreete	3	Lore Kaaguma	1	9	1	14.9	18.7	118	-3.40719	-2.63493	18.7	1.28691	2	1	1	0	1	0	0	0	0	0		1	1	1	20	1	19	33	11	2	16	0	0	0	4	2	8	2	7	63	10	73	16	16
NA_003_040	4	2	Naregei-Nakoreete	3	Lore Apokomol	1	8	0	14.5	20.1	128	-1.72055	0.120591	20.1	1.70062	0	0	0	0	0	0	0	0	0	0		1	1	1	2	1	3	3	7	7	14	1	1	0	4	5	8	1	6	13	35	48	16	18
NA_003_041	4	2	Naregei-Nakoreete	3	Lore Apokomol	1	11	1	15.4	28.4	148	-1.2789	0.696294	28.4	2.97594	0	0	0	0	0	0	0	0	0	0		1	1	1	1	1	2	2	5	2	6	4	0	1	5	5	7	1	0	9	10	19	11	18
NA_003_042	4	2	Naregei-Nakoreete	3	Lore Apokomol	1	9	1	16.6	24.5	132	-1.02984	-0.220727	24.5	2.82559	0	0	0	0	0	0	0	0	0	0		1	1	0		1	0	0	0	1	3	2	0	0	2	1	1	1	4	0	5	5	5	5
NA_003_043	4	2	Naregei-Nakoreete	3	Lore Apokomol	1	9	0	15.8	26.9	139	-0.424208	1.05772	26.9	2.97385	0	0	0	0	0	0	0	0	0	0		1	1	0		1	3	6	0	0	15	9	1	0	3	0	4	3	2	9	0	9	25	10
NA_003_044	4	2	Naregei-Nakoreete	3	Lore Apokomol	1	8	0	14	19.5	127	-1.95055	-0.0621217	19.5	1.50403	0	0	0	0	0	0	0	0	0	0		1	1	0		1	2	0	0	0	3	0	0	0	0	0	4	0	1	2	0	2	3	4
NA_003_045	4	2	Naregei-Nakoreete	3	Lore Kaaguma	1	10	0	17.3	27.7	148	-0.898326	1.50517	27.7	2.88129	0	0	0	0	0	0	0	0	0	0		1	1	1	1	1	4	2	12	0	13	2	2	2	1	1	3	2	3	18	0	18	19	7
NA_003_046	4	2	Naregei-Nakoreete	3	Lore Apokomol	1	8	1	16.4	24.2	129	-0.406965	0.209966	24.2	3.05857	0	0	0	0	0	0	0	0	0	0		1	0	0		1	0	3	30	1	13	2	0	3	5	10	9	1	6	33	5	38	18	25
NA_003_047	4	2	Naregei-Nakoreete	3	Lore Apokomol	1	11	1	16.9	30.9	149	-0.699759	0.846681	30.9	3.24346	0	0	0	0	0	0	0	0	0	0		1	1	1	2	1	6	14	12	4	14	10	4	0	9	5	10	0	11	32	20	52	28	24
NA_003_048	4	2	Naregei-Nakoreete	3	Lore Apokomol	1	8	0	16.3	24.2	137	-0.425583	1.76501	24.2	2.74482	0	0	0	0	0	0	0	0	0	0		1	1	1	149	1	1	4	2	20	18	18	3	0	15	9	5	5	12	7	100	107	39	34
NA_003_049	4	2	Naregei-Nakoreete	3	Lore Apokomol	1	8	0	15	20.5	123	-1.57391	-0.792973	20.5	1.82422	0	0	0	0	0	0	0	0	0	0		1	1	0		1	0	0	2	0	12	4	1	0	1	0	6	0	0	2	0	2	17	7
NA_003_051	4	2	Naregei-Nakoreete	3	Lore Apokomol	1	11	0	18.7	33.1	154	-0.458851	1.43269	33.1	3.372	0	0	0	0	0	0	0	0	0	0		1	1	0		1	0	0	5	0	4	0	0	0	2	0	9	0	0	5	0	5	4	11
NA_003_052	4	2	Naregei-Nakoreete	3	Lore Apokomol	1	14	0	19.2	34.1	148	-2.51463	-1.77414	34.1	3.13369	1	0	0	0	0	0	0	0	0	0		1	1	0		1	0	1	17	0	3	0	0	0	1	0	1	0	1	18	0	18	3	2
NA_003_053	4	2	Naregei-Nakoreete	3	Lore Apokomol	1	10	0	16.9	34.2	154	0.307652	2.44885	34.2	3.63649	0	0	1	0	0	0	0	0	1	0		1	1	0		1	0	3	2	0	10	2	0	0	3	4	8	0	1	5	0	5	12	15
NA_003_054	4	2	Naregei-Nakoreete	3	Lore Apokomol	1	12	0	18.7	34.2	156	-0.904904	0.876271	34.2	3.35082	0	0	0	0	0	0	0	0	0	0		1	0	0		1	0	0	5	0	0	1	0	0	0	0	0	0	0	5	0	5	1	0
NA_003_056	4	2	Naregei-Nakoreete	3	Lore Apokomol	1	10	1	16.4	24.2	134	-1.83127	-0.709981	24.2	2.53821	0	0	1	0	1	0	0	0	0	0		1	1	0		1	4	3	4	1	7	0	0	0	5	2	5	0	10	11	5	16	7	12
NA_003_057	4	2	Naregei-Nakoreete	3	Lore Apokomol	1	10	0	16.4	19.5	125	-3.36441	-2.11227	19.5	1.03869	2	1	1	0	1	0	0	0	0	0		1	1	0		1	3	0	2	0	9	1	0	0	0	0	2	2	3	5	0	5	10	4
NA_003_058	4	2	Naregei-Nakoreete	3	Lore Apokomol	1	11	0	11	16.2	137		-1.03246	16.2	-0.624549	0	0	0	0	0	0	0	0	0	0		1	1	1	239	1	13	23	5	64	18	10	9	13	13	10	10	0	15	41	320	361	50	33
NA_003_059	4	2	Naregei-Nakoreete	3	Lore Kaaguma	1	8	1	12.7	19	126	-2.40478	-0.33777	19	1.6314	1	0	0	0	0	0	0	0	0	0		1	1	1	8	1	19	11	6	2	16	0	0	0	1	0	6	2	5	36	10	46	16	9
NA_003_060	4	2	Naregei-Nakoreete	3	Lore Apokomol	1	8	0	15.6	22.1	136	-1.03515	1.58229	22.1	2.26668	0	0	1	0	1	0	0	0	0	0		1	1	0		1	1	1	7	0	10	0	0	0	0	0	2	1	0	9	0	9	10	3
NA_003_061	4	2	Naregei-Nakoreete	3	Lore Kaaguma	1	8	0	17.4	23.4	133	-0.646249	1.03415	23.4	2.57451	0	0	0	0	0	0	0	0	0	0		1	1	0		1	1	0	4	1	4	1	0	0	0	3	4	1	4	5	5	10	5	8
NA_003_110	4	2	Naregei-Nakoreete	3	Lore Apokomol	1	14	0	23.3	46.9	162	-0.407152	0.365219	46.9	4.13364	0	0	0	0	0	0	0	0	0	0		1	1	1	8	1	1	6	27	6	17	16	0	0	17	10	8	2	9	34	30	64	33	37
NA_004_003	4	4	Naoyaminit	4	Lore Aporengereng	1	9	0	17.1	23.8	133	-1.21342	0.0308061	23.8	2.41129	0	0	0	0	0	0	0	0	0	0		1	1	1	1	1	4	8	13	1	6	1	5	2	2	8	8	1	0	25	5	30	14	19
NA_004_004	4	4	Naoyaminit	4	Lore Aporengereng	1	12	0	17.7	28.1	136	-2.07022	-1.93229	28.1	2.59196	1	0	0	0	0	0	0	0	0	0		1	1	0		1	0	0	3	0	1	3	0	0	1	1	0	0	0	3	0	3	4	2
NA_004_006	4	4	Naoyaminit	4	Lore Aporengereng	1	8	1	15.3	21.9	124	-1.17331	-0.702927	21.9	2.54422	0	0	0	0	0	0	0	0	0	0		1	1	0		1	3	1	2	0	1	0	0	1	0	0	1	1	1	6	0	6	2	2
NA_004_008	4	4	Naoyaminit	4	Lore Aporengereng	1	8	1	16.5	24.6	133	-0.28835	0.94028	24.6	3.13443	0	0	1	0	1	0	0	0	0	0		1	0	0		1	0	1	4	0	10	1	0	0	0	0	1	1	0	5	0	5	11	2
NA_004_009	4	4	Naoyaminit	4	Lore Aporengereng	1	8	1	14.7	19.6	118	-2.12002	-1.7984	19.6	1.85181	1	0	0	0	0	0	0	0	0	0		1	1	0		1	1	6	36	1	6	2	2	0	2	8	7	0	1	43	5	48	10	17
NA_004_011	4	4	Naoyaminit	4	Lore Alomerimanik	1	10	1	18.4	31.5	145	0.0291233	1.06901	31.5	3.47023	0	0	0	0	0	0	0	0	0	0		1	0	0		1	0	0	3	0	1	0	0	0	0	3	2	0	0	3	0	3	1	5
NA_004_012	4	4	Naoyaminit	4	Lore Aporengereng	1	10	1	16.4	25.9	132	-1.29962	-1.03343	25.9	2.82339	0	0	0	0	0	0	0	0	0	0		1	0	0		1	0	0	2	0	2	1	1	0	0	3	3	0	0	2	0	2	4	6
NA_004_013	4	4	Naoyaminit	4	Lore Aporengereng	1	13	1	18.8	30.9	139	-2.00608	-2.01052	30.9	2.99782	1	1	1	0	0	0	0	0	0	1	Wounds	1	1	0		1	1	1	2	0	4	0	0	0	0	0	1	0	0	4	0	4	4	1
NA_004_015	4	4	Naoyaminit	4	Lore Alomerimanik	1	8	1	16.4	26.2	132	0.149804	0.757701	26.2	3.40587	0	0	0	0	0	0	0	0	0	0		1	1	1	1	1	0	0	4	0	10	2	0	0	3	0	0	0	0	4	0	4	12	3
NA_004_016	4	4	Naoyaminit	4	Lore Aporengereng	1	10	0	17.4	25.9	135	-1.32311	-0.539469	25.9	2.5922	0	0	0	0	0	0	0	0	0	0		1	0	0		1	0	0	5	0	0	2	0	1	0	3	2	0	0	5	0	5	3	5
NA_004_017	4	4	Naoyaminit	4	Lore Aporengereng	1	8	1	15.3	23.4	133	-0.656391	0.94028	23.4	2.89575	0	0	1	0	1	0	0	0	0	0		1	1	1	4	1	3	3	35	2	14	4	0	1	8	8	6	3	4	41	10	51	19	25
NA_004_018	4	4	Naoyaminit	4	Lore Alomerimanik	1	13	0	19.5	34.6	155	-1.6056	-0.0404121	34.6	3.2823	0	0	1	0	0	1	0	0	0	0		1	0	0		1	10	14	20	0	18	8	2	0	8	4	8	0	6	44	0	44	28	20
NA_004_019	4	4	Naoyaminit	4	Lore Alomerimanik	1	11	0	17.3	24.1	129	-2.39713	-2.19253	24.1	2.04675	1	1	0	0	0	0	0	0	0	0		1	1	0		1	1	0	5	0	12	1	0	0	0	0	3	0	0	6	0	6	13	3
NA_004_021	4	4	Naoyaminit	4	Lore Alouro	1	8	0	17.3	25.1	133	-0.192429	1.03415	25.1	2.9213	0	0	0	0	0	0	0	0	0	0		1	0	0		1	5	4	13	0	8	2	0	0	5	10	9	0	0	22	0	22	10	24
NA_004_022	4	4	Naoyaminit	4	Lore Alouro	1	9	1	17.8	28.9	132	0.113576	-0.220727	28.9	3.44987	0	0	0	0	0	0	0	0	0	0		1	0	0		1	3	0	0	0	2	1	0	0	3	1	2	0	1	3	0	3	3	6
NA_004_026	4	4	Naoyaminit	4	Lore Apalowal	1	10	0	29.5	30.5	143	-0.324508	0.718771	30.5	3.25279	0	0	1	0	1	0	0	0	0	0		1	1	1	6	1	5	0	30	2	12	4	1	0	5	9	8	1	8	35	10	45	17	23
NA_004_028	4	4	Naoyaminit	4	Lore Apalowal	1	8	0	14.5	18.7	119	-2.27768	-1.52382	18.7	1.21875	1	0	0	0	0	0	0	0	0	0		1	1	0		1	0	0	2	0	0	3	1	0	18	10	10	0	0	2	0	2	4	38
NA_004_029	4	4	Naoyaminit	4	Lore Alomerimanik	1	8	1	15.5	18.7	116	-2.55403	-2.16356	18.7	1.51365	1	1	0	0	0	0	0	0	0	0		1	1	0		1	0	0	6	0	5	1	0	0	1	0	0	0	1	6	0	6	6	1
NA_004_031	4	4	Naoyaminit	4	Lore Alouro	1	8	1	15	24.5	137	-0.31764	1.67059	24.5	3.11579	0	0	0	0	0	0	0	0	0	0		1	1	0		1	0	0	4	0	5	1	0	0	0	0	3	0	1	4	0	4	6	3
NA_004_032	4	4	Naoyaminit	4	Lore Alouro	1	10	0	19.5	33.7	148	0.229249	1.50517	33.7	3.59037	0	0	0	0	0	0	0	0	0	0		1	0	0		1	0	0	0	1	1	1	0	0	1	7	10	0	0	0	5	5	2	18
NA_004_033	4	4	Naoyaminit	4	Lore Alouro	1	8	0	16	25	135	-0.217593	1.39958	25	2.90242	0	0	0	0	0	0	0	0	0	0		1	1	0		1	16	12	0	0	10	2	2	1	1	2	4	0	1	28	0	28	15	7
NA_004_035	4	4	Naoyaminit	4	Lore Alouro	1	8	1	15.4	22.2	130	-1.06433	0.392544	22.2	2.61991	0	0	0	0	0	0	0	0	0	0		1	1	0		1	3	1	8	1	13	1	0	0	2	1	5	1	0	12	5	17	14	9
NA_004_036	4	4	Naoyaminit	4	Lore Alouro	1	8	0	14.8	18.8	116	-2.23543	-2.07196	18.8	1.25597	1	1	0	0	0	0	0	0	0	0		1	1	0		1	0	0	4	0	4	1	0	0	1	0	1	0	0	4	0	4	5	2
NA_004_037	4	4	Naoyaminit	4	Lore Alouro	1	8	1	15.5	23.4	130	-0.656391	0.392544	23.4	2.89575	0	0	0	0	0	0	0	0	0	0		1	0	0		1	4	3	2	0	9	3	0	0	0	0	8	0	0	9	0	9	12	8
NA_004_038	4	4	Naoyaminit	4	Lore Alouro	1	8	1	13.4	20.1	119	-1.89573	-1.61582	20.1	2.02148	0	0	0	0	0	0	0	0	0	0		1	1	0		1	1	7	0	0	10	1	0	0	0	2	1	1	0	8	0	8	11	4
NA_004_040	4	4	Naoyaminit	4	Lore Alouro	1	12	0	19.2	33	150	-1.10972	0.0337035	33	3.22688	0	0	0	0	0	0	0	0	0	0		1	1	0		1	0	1	3	1	9	0	0	0	4	2	5	0	1	4	5	9	9	11
NA_004_041	4	4	Naoyaminit	4	Lore Alouro	1	8	0	18	27.6	135	0.383299	1.39958	27.6	3.34162	0	0	1	0	0	0	0	0	0	1	Skin rash	1	1	1	1	1	0	0	1	0	14	2	0	0	0	0	8	0	0	1	0	1	16	8
NA_004_042	4	4	Naoyaminit	4	Lore Aporengereng	1	14	0	18	29.9	147	-3.44085	-1.92695	29.9	2.58902	2	0	1	0	0	0	0	0	1	0		1	1	0		1	0	0	1	0	0	0	0	1	0	2	3	0	0	1	0	1	1	5
NA_004_043	4	4	Naoyaminit	4	Lore Alouro	1	10	0	15.8	20.9	118	-2.82633	-3.21323	20.9	1.47432	1	2	0	0	0	0	0	0	0	0		1	1	0		1	9	0	2	0	11	1	1	0	0	0	2	0	1	11	0	11	13	2
NA_004_044	4	4	Naoyaminit	4	Lore Aporengereng	1	14	0	18	29.9	147	-3.44085	-1.92695	29.9	2.58902	2	0	0	0	0	0	0	0	0	0		1	1	0		1	1	1	2	0	2	0	1	0	0	8	7	0	1	4	0	4	3	15
NA_004_046	4	4	Naoyaminit	4	Lore Alomerimanik	1	10	1	14.9	20.1	123	-3.50433	-2.48898	20.1	1.54724	2	1	0	0	0	0	0	0	0	0		1	1	0		1	0	0	3	0	2	1	1	0	1	7	9	1	0	3	0	3	4	18
NA_004_047	4	4	Naoyaminit	4	Lore Alouro	1	14	0	19	33.8	139	-2.57582	-3.14945	33.8	3.09983	1	2	0	0	0	0	0	0	0	0		1	1	1	49	1	2	8	22	20	17	10	1	3	18	10	9	1	11	32	100	132	31	38
NA_004_048	4	4	Naoyaminit	4	Lore Alouro	1	8	0	15.1	20.1	124	-1.72055	-0.61026	20.1	1.70062	0	0	0	0	0	0	0	0	0	0		1	0	1	1	1	0	0	3	0	16	2	0	0	0	0	0	0	2	3	0	3	18	0
NA_004_049	4	4	Naoyaminit	4	Lore Alouro	1	8	0	16.6	21.5	119	-1.22878	-1.52382	21.5	2.10979	0	0	0	0	0	0	0	0	0	0		1	1	0		1	0	1	2	0	12	3	0	0	2	0	3	0	0	3	0	3	15	5
NA_004_051	4	4	Naoyaminit	4	Lore Alouro	1	10	1	15	26	138	-1.27061	-0.0630734	26	2.83852	0	0	0	0	0	0	0	0	0	0		1	1	1	3	1	5	4	22	3	13	7	4	1	5	10	8	2	4	31	15	46	25	25
NA_004_053	4	4	Naoyaminit	4	Lore Kebutur	1	8	0	18.1	27.7	138	0.404387	1.94772	27.7	3.35659	0	0	1	0	1	0	0	0	0	0		1	0	0		1	5	1	0	0	6	1	0	0	1	0	5	2	1	6	0	6	7	8
NA_004_056	4	4	Naoyaminit	4	Lore Alouro	1	8	1	17.2	24.3	124	-0.376944	-0.702927	24.3	3.07786	0	0	0	0	0	0	0	0	0	0		1	1	0		1	4	2	2	0	5	0	0	0	0	0	1	0	8	8	0	8	5	1
NA_004_059	4	4	Naoyaminit	4	Lore Alouro	1	9	1	14.5	21.3	125	-2.17401	-1.42783	21.3	2.12438	1	0	0	0	0	0	0	0	0	0		1	1	1	34	1	20	22	4	4	14	10	3	0	12	7	8	1	2	46	20	66	27	28
NA_004_061	4	4	Naoyaminit	4	Lore Alouro	1	8	0	15.2	18.3	170	-2.45081		18.3	1.06509	1	0	0	0	0	0	0	0	0	0		1	0	0		1	0	0	4	0	4	0	1	1	0	1	3	0	0	4	0	4	6	4
NA_004_062	4	4	Naoyaminit	4	Lore Apalowal	1	8	1	15.2	19.6	119	-2.12002	-1.61582	19.6	1.85181	1	0	0	0	0	0	0	0	0	0		1	1	1	1	1	1	0	0	0	11	0	0	0	1	1	8	1	0	1	0	1	11	11
NA_004_063	4	4	Naoyaminit	4	Lore Apalowal	1	8	1	15.3	22.3	124	-1.02865	-0.702927	22.3	2.6445	0	0	0	0	0	0	0	0	0	0		1	1	1	3	1	9	4	0	0	7	1	0	0	0	1	4	0	3	13	0	13	8	5
NA_004_064	4	4	Naoyaminit	4	Lore Apalowal	1	8	1	14.3	18.8	122	-2.50375	-1.06808	18.8	1.55349	1	0	0	0	0	0	0	0	0	0		1	1	0		1	0	0	1	0	2	0	0	0	0	0	1	0	0	1	0	1	2	1
NA_004_066	4	4	Naoyaminit	4	Lore Apalowal	1	12	1	18.4	33	147	-0.867778	-0.189086	33	3.30352	0	0	0	0	0	0	0	0	0	0		1	1	0		1	2	0	21	0	8	2	0	0	4	10	9	1	5	23	0	23	10	24
NA_004_067	4	4	Naoyaminit	4	Lore Apalowal	1	11	1	17.4	29.9	143	-0.919692	-0.0556425	29.9	3.14404	0	0	0	0	0	0	0	0	0	0		1	1	0		1	0	0	20	0	2	6	1	0	8	7	8	0	6	20	0	20	9	23
NA_004_068	4	4	Naoyaminit	4	Lore Apalowal	1	10	0	18	29.5	140	-0.518643	0.246931	29.5	3.12956	0	0	0	0	0	0	0	0	0	0		1	1	0		1	13	3	6	2	11	1	1	0	6	2	10	0	5	22	10	32	13	18
NA_004_069	4	4	Naoyaminit	4	Lore Apalowal	1	12	1	17	27.4	136	-2.15573	-1.71846	27.4	2.69359	1	0	0	0	0	0	0	0	0	0		1	1	0		1	0	0	3	0	2	0	0	0	0	0	0	2	1	3	0	3	2	2
NA_004_071	4	4	Naoyaminit	4	Lore Apalowal	1	14	0	17.6	27.4	137	-4.07554	-3.45507	27.4	2.17395	2	2	0	0	0	0	0	0	0	0		1	1	1	24	1	0	0	7	18	16	12	2	3	16	10	3	7	8	7	90	97	33	36
NA_004_072	4	4	Naoyaminit	4	Lore Apalowal	1	8	1	15.3	20.8	121	-1.5999	-1.25066	20.8	2.23995	0	0	0	0	0	0	0	0	0	0		1	1	0		1	1	4	2	0	5	3	0	1	3	0	2	0	2	7	0	7	9	5
NA_004_074	4	4	Naoyaminit	4	Lore Apalowal	1	12	0	17.2	30.9	149	-1.49484	-0.106724	30.9	2.98311	0	0	0	0	0	0	0	0	0	0		1	1	0		1	0	0	4	0	11	0	0	0	0	0	7	1	0	4	0	4	11	8
NA_004_075	4	4	Naoyaminit	4	Lore Apalowal	1	9	1	15.6	25.9	132	-0.621915	-0.220727	25.9	3.05728	0	0	0	0	0	0	0	0	0	0		1	1	1	2	1	3	3	6	0	5	1	0	0	0	0	3	0	1	12	0	12	6	3
NA_004_076	4	4	Naoyaminit	4	Lore Alouro	1	8	0	17	21.1	119	-1.36332	-1.52382	21.1	1.99937	0	0	0	0	0	0	0	0	0	0		1	1	0		1	0	0	1	0	7	1	0	0	0	0	4	0	1	1	0	1	8	4
NA_004_077	4	4	Naoyaminit	4	Lore Apalowal	1	10	0	18.7	36.7	155	0.671835	2.60613	36.7	3.84523	0	0	1	0	0	0	0	0	0	1	Wound on right foot, lateral side	1	1	0		1	0	0	1	0	3	0	0	0	0	1	2	0	1	1	0	1	3	3
NA_004_078	4	4	Naoyaminit	4	Lore Apalowal	1	10	0	17	30.5	148	-0.324508	1.50517	30.5	3.25279	0	0	0	0	0	0	0	0	0	0		1	1	0		1	0	0	4	0	4	1	0	0	0	0	0	9	0	4	0	4	5	9
NA_004_081	4	4	Naoyaminit	4	Lore Aporengereng	1	8	1	16.6	25.7	133	0.018756	0.94028	25.7	3.32614	0	0	0	0	0	0	0	0	0	0		1	1	1	1	1	0	0	5	0	4	1	0	1	2	7	8	1	0	5	0	5	6	18
NA_004_084	4	4	Naoyaminit	4	Lore Aporengereng	1	9	1	17.1	25.7	133	-0.677346	-0.0482839	25.7	3.02637	0	0	0	0	0	0	0	0	0	0		1	1	0		1	0	1	5	0	3	0	0	0	0	0	5	0	1	6	0	6	3	5
NA_004_085	4	4	Naoyaminit	4	Lore Apalowal	1	9	1	17.3	26.8	131	-0.383172	-0.39317	26.8	3.1883	0	0	0	0	0	0	0	0	0	0		1	1	1	1	1	0	0	5	0	9	0	0	0	2	0	2	0	1	5	0	5	9	4
NA_004_086	4	4	Naoyaminit	4	Lore Alouro	1	8	1	15.3	22.2	123	-1.06433	-0.885506	22.2	2.61991	0	0	0	0	0	0	0	0	0	0		1	1	0		1	0	0	13	2	9	1	0	0	4	8	8	0	0	13	10	23	10	20
NA_004_087	4	4	Naoyaminit	4	Lore Apalowal	1	10	1	16.5	29.4	145	-0.407021	1.06901	29.4	3.26853	0	0	0	0	0	0	0	0	0	0		1	1	1	5	1	7	2	4	0	10	0	0	0	2	0	5	5	3	13	0	13	10	12
NA_004_089	4	4	Naoyaminit	4	Lore Apalowal	1	8	1	15	19.6	118	-2.12002	-1.7984	19.6	1.85181	1	0	0	0	0	0	0	0	0	0		1	1	0		1	0	2	2	0	0	0	0	0	0	0	1	0	2	4	0	4	0	1
NA_004_090	4	4	Naoyaminit	4	Lore Apalowal	1	8	1	14.3	18.6	112	-2.60485	-2.89387	18.6	1.47321	1	1	0	0	0	0	0	0	0	0		1	1	1	8	1	11	20	35	3	10	2	1	1	3	8	9	0	11	66	15	81	14	20
NA_004_091	4	4	Naoyaminit	4	Lore Apalowal	1	14	1	19.6	45.3	173	-0.449493	1.28245	45.3	3.91594	0	0	0	0	0	0	0	0	0	0		1	1	0		1	1	0	59	0	14	10	6	0	13	10	7	4	7	60	0	60	30	34
NA_004_092	4	4	Naoyaminit	4	Lore Aporengereng	1	8	0	14.9	17.1	111	-3.01343	-2.98552	17.1	0.553107	2	1	0	0	0	0	0	0	0	0		1	1	0		1	0	0	12	0	3	2	0	0	1	2	4	0	1	12	0	12	5	7
NA_004_093	4	4	Naoyaminit	4	Lore Apalowal	1	9	0	21	35	137	1.03614	0.715415	35	3.91023	0	0	0	0	0	0	0	0	0	0		1	1	0		1	2	0	0	0	1	1	0	0	0	0	0	0	1	2	0	2	2	0
NA_004_094	4	4	Naoyaminit	4	Lore Apalowal	1	8	1	16	23.9	132	-0.498538	0.757701	23.9	2.99931	0	0	0	0	0	0	0	0	0	0		1	1	0		1	0	2	7	0	11	1	0	0	0	1	4	4	0	9	0	9	12	9
NA_004_095	4	4	Naoyaminit	4	Lore Apalowal	1	9	1	17.6	26.8	135	-0.383172	0.296602	26.8	3.1883	0	0	0	0	0	0	0	0	0	0		1	1	0		1	1	0	2	0	0	0	0	0	0	3	3	0	2	3	0	3	0	6
NA_004_096	4	4	Naoyaminit	4	Lore Apalowal	1	8	0	17.5	24.9	133	-0.242937	1.03415	24.9	2.88337	0	0	0	0	0	0	0	0	0	0		1	1	0		1	0	0	1	0	2	0	0	0	0	1	1	0	1	1	0	1	2	2
NA_004_097	4	4	Naoyaminit	4	Lore Apalowal	1	10	1	19.5	21.7	127	-2.77253	-1.84207	21.7	1.99783	1	0	1	0	0	0	0	0	0	1	Skin rash	1	1	0		1	0	0	1	0	0	0	0	0	0	0	0	0	0	1	0	1	0	0
NA_004_098	4	4	Naoyaminit	4	Lore Apalowal	1	12	0	20.4	33.4	147	-1.04029	-0.38758	33.4	3.26934	0	0	0	0	0	0	0	0	0	0		1	1	0		1	0	0	4	0	5	1	0	0	1	4	6	0	0	4	0	4	6	11
NA_004_099	4	4	Naoyaminit	4	Lore Aporengereng	1	11	0	16.4	28.4	140	-1.34853	-0.597435	28.4	2.8014	0	0	1	0	1	0	0	0	0	0		1	1	0		1	0	0	7	0	7	0	0	0	1	0	0	1	0	7	0	7	7	2
NA_004_100	4	4	Naoyaminit	4	Lore Alomerimanik	1	9	1	13.1	21.1	123	-2.25761	-1.77272	21.1	2.07025	1	0	0	0	0	0	0	0	0	0		1	1	1	2	1	5	4	3	0	12	0	0	0	0	1	7	2	0	12	0	12	12	10
NA_004_102	4	4	Naoyaminit	4	Lore Apalowal	1	12	1	19	34.4	136	-0.606858	-1.71846	34.4	3.41408	0	0	0	0	0	0	0	0	0	0		1	1	1	1	1	2	2	35	0	8	4	1	2	11	8	7	0	7	39	0	39	15	26
NA_004_103	4	4	Naoyaminit	4	Lore Alomerimanik	1	10	0	19.2	35	150	0.429067	1.81973	35	3.70709	0	0	1	0	0	0	0	0	0	1	Wounds	1	0	0		1	0	0	3	0	6	0	1	1	1	0	2	0	2	3	0	3	8	3
NA_005_002	4	2	Nachuka	5	Lore Kaapuun	1	10	1	15.4	19.6	120	-3.75877	-2.97416	19.6	1.38448	2	1	1	0	1	0	0	0	0	0		1	1	1	1	1	2	3	13	1	8	0	0	1	0	0	8	0	8	18	5	23	9	8
NA_005_003	4	2	Nachuka	5	Lore Kaapuun	1	8	0	13.8	16.7	138	-3.21697	1.94772	16.7	0.363154	2	0	0	0	0	0	0	0	0	0		1	1	0		1	2	4	30	0	12	0	0	0	2	5	6	0	5	36	0	36	12	13
NA_005_004	4	2	Nachuka	5	Lore Kaapuun	1	8	1	14.5	19.6	118	-2.12002	-1.7984	19.6	1.85181	1	0	0	0	0	0	0	0	0	0		1	1	0		1	9	2	1	0	13	4	0	1	1	1	6	0	6	12	0	12	18	8
NA_005_005	4	2	Nachuka	5	Lore Kaapuun	1	8	0	15.1	18	116	-2.58517	-2.07196	18	0.944581	1	1	0	0	0	0	0	0	0	0		1	1	0		1	1	0	4	0	8	0	0	0	0	0	0	0	0	5	0	5	8	0
NA_005_009	4	2	Nachuka	5	Lore Koopuwa	1	13	1	18.1	36.5	153	-0.943335	-0.225658	36.5	3.48204	0	0	0	0	0	0	0	0	0	0		1	1	0		1	0	0	30	0	8	0	1	0	0	10	7	3	0	30	0	30	9	20
NA_005_010	4	2	Nachuka	5	Lore Koopuwa	1	13	1	20.2	30.3	163	-2.13832	1.04924	30.3	2.93096	1	0	0	0	0	0	0	0	0	0		1	0	0		1	0	0	3	0	4	1	0	0	0	0	4	5	0	3	0	3	5	9
NA_005_011	4	2	Nachuka	5	Lore Koopuwa	1	8	1	17	27.1	135	0.373475	1.30544	27.1	3.53905	0	0	0	0	0	0	0	0	0	0		1	1	0		1	0	2	4	4	12	4	0	1	4	0	3	0	8	6	20	26	17	7
NA_005_012	4	2	Nachuka	5	Lore Koopuwa	1	8	1	14.7	20.4	125	-1.76645	-0.520349	20.4	2.1177	0	0	0	0	0	0	0	0	0	0		1	0	0		1	2	0	1	0	10	1	0	1	0	0	5	2	2	3	0	3	12	7
NA_005_013	4	2	Nachuka	5	Lore Koopuwa	1	8	0	17.9	23.4	125	-0.646249	-0.427547	23.4	2.57451	0	0	0	0	0	0	0	0	0	0		1	1	0		1	1	3	33	0	15	7	0	0	8	10	8	2	0	37	0	37	22	28
NA_005_014	4	2	Nachuka	5	Lore Koopuwa	1	9	1	15.6	21.6	119	-2.05166	-2.46249	21.6	2.20291	1	1	0	0	0	0	0	0	0	0		1	1	0		1	1	0	6	0	3	0	0	0	0	0	0	0	0	7	0	7	3	0
NA_005_015	4	2	Nachuka	5	Lore Alotee	1	8	1	14.8	20.9	120	-1.55926	-1.43324	20.9	2.26948	0	0	0	0	0	0	0	0	0	0		1	1	1	1	1	2	6	14	0	13	3	0	0	3	1	7	0	2	22	0	22	16	11
NA_005_016	4	2	Nachuka	5	Lore Koopuwa	1	10	0	19.5	30.9	148	-0.249896	1.50517	30.9	3.29948	0	0	0	0	0	0	0	0	0	0		1	1	0		1	1	1	3	0	11	1	0	0	0	1	1	0	3	5	0	5	12	2
NA_005_017	4	2	Nachuka	5	Lore Kaapuun	1	8	0	16	21.6	126	-1.19584	-0.244834	21.6	2.13665	0	0	0	0	0	0	0	0	0	0		1	0	0		1	0	0	27	0	9	1	1	0	0	5	7	0	4	27	0	27	11	12
NA_005_018	4	2	Nachuka	5	Lore Alotee	1	12	1	18.7	33.8	147	-0.71623	-0.189086	33.8	3.36826	0	0	0	0	0	0	0	0	0	0		1	1	0		1	0	0	1	0	3	0	0	0	0	7	5	0	0	1	0	1	3	12
NA_005_020	4	2	Nachuka	5	Lore Alotee	1	12	1	16.5	30.1	150	-1.47935	0.228015	30.1	3.02726	0	0	0	0	0	0	0	0	0	0		1	0	0		1	1	0	5	0	6	2	0	0	1	0	1	2	3	6	0	6	8	4
NA_005_021	4	2	Nachuka	5	Lore Alotee	1	11	0	20.3	34.6	145	-0.21619	0.127608	34.6	3.5167	0	0	0	0	0	0	0	0	0	0		1	0	0		1	0	0	2	0	12	3	0	0	0	0	9	0	1	2	0	2	15	9
NA_005_025	4	2	Nachuka	5	Lore Alotee	1	13	0	20.8	46.2	167	0.104876	1.69154	46.2	4.13695	0	0	1	0	0	1	0	0	0	0		1	0	0		1	0	0	10	0	5	0	1	0	0	8	7	2	1	10	0	10	6	17
NA_005_026	4	2	Nachuka	5	Lore Alotee	1	13	0	20.3	42.2	159	-0.416007	0.536906	42.2	3.90244	0	0	1	0	0	1	0	0	0	0		1	0	0		1	5	24	16	0	17	3	1	0	7	1	8	1	1	45	0	45	21	17
NA_005_028	4	2	Nachuka	5	Lore Alotee	1	8	1	15.9	25.9	129	0.071784	0.209966	25.9	3.35855	0	0	0	0	0	0	0	0	0	0		1	0	0		1	0	0	4	1	2	1	0	0	1	8	5	1	0	4	5	9	3	15
NA_005_029	4	2	Nachuka	5	Lore Alotee	1	12	0	19.4	43.3	170	0.37378	2.84226	43.3	4.0394	0	0	0	0	0	0	0	0	0	0		1	0	0		1	0	0	3	0	11	3	0	0	0	0	3	1	3	3	0	3	14	4
NA_005_030	4	2	Nachuka	5	Lore Alotee	1	9	1	15.8	24.7	130	-0.968605	-0.565613	24.7	2.86099	0	0	0	0	0	0	0	0	0	0		1	1	0		1	1	1	2	0	6	0	0	0	1	0	4	0	8	4	0	4	6	5
NA_005_031	4	2	Nachuka	5	Lore Alotee	1	8	1	14.5	19.4	121	-2.21297	-1.25066	19.4	1.78047	1	0	0	0	0	0	0	0	0	0		1	0	0		1	0	0	4	0	8	1	0	0	0	0	3	0	1	4	0	4	9	3
NA_005_032	4	2	Nachuka	5	Lore Koopuwa	1	14	0	24.8	50.6	169	0.0674295	1.4349	50.6	4.31822	0	0	0	0	0	0	0	0	0	0		1	0	0		1	0	5	24	0	7	2	0	0	6	10	8	2	3	29	0	29	9	26
NA_005_034	4	2	Nachuka	5	Lore Alotee	1	8	1	15.7	20.6	118	-1.68236	-1.7984	20.6	2.17966	0	0	0	0	0	0	0	0	0	0		1	1	0		1	0	1	7	0	10	1	0	1	0	0	2	0	3	8	0	8	12	2
NA_005_035	4	2	Nachuka	5	Lore Koopuwa	1	9	0	18.2	27.5	135	-0.289908	0.373111	27.5	3.0657	0	0	0	0	0	0	0	0	0	0		1	1	0		1	0	0	3	0	10	0	0	0	1	0	5	2	0	3	0	3	10	8
NA_005_036	4	2	Nachuka	5	Lore Alotee	1	10	0	15.3	21.7	124	-2.54591	-2.26955	21.7	1.69397	1	1	0	0	0	0	0	0	0	0		1	1	0		1	0	2	28	0	13	1	0	0	2	0	6	1	2	30	0	30	14	9
NA_005_037	4	2	Nachuka	5	Lore Alotee	1	8	1	15.9	19.6	116	-2.12002	-2.16356	19.6	1.85181	1	1	0	0	0	0	0	0	0	0		1	1	0		1	3	0	7	0	4	1	0	1	3	0	1	1	5	10	0	10	6	5
NA_005_039	4	2	Nachuka	5	Lore Koopuwa	1	8	1	14.5	22.3	126	-1.02865	-0.33777	22.3	2.6445	0	0	0	0	0	0	0	0	0	0		1	1	0		1	12	9	4	0	4	4	2	0	2	0	6	1	5	25	0	25	10	9
NA_005_040	4	2	Nachuka	5	Lore Alotee	1	9	1	15.2	25.8	141	-0.649518	1.33126	25.8	3.04191	0	0	1	0	0	0	0	0	0	1	Dandruff	1	1	0		1	1	1	15	0	8	2	0	0	3	0	5	0	3	17	0	17	10	8
NA_005_042	4	2	Nachuka	5	Lore Alotee	1	8	1	15.2	20.1	116	-1.89573	-2.16356	20.1	2.02148	0	1	0	0	0	0	0	0	0	0		1	1	1	2	1	0	0	14	0	7	3	1	0	3	5	4	0	9	14	0	14	11	12
NA_005_046	4	2	Nachuka	5	Lore Alotee	1	9	1	17.2	28.2	138	-0.0434116	0.813932	28.2	3.36883	0	0	0	0	0	0	0	0	0	0		1	1	0		1	0	1	8	0	4	0	0	0	0	4	3	1	0	9	0	9	4	8
NA_005_047	4	2	Nachuka	5	Lore Alotee	1	8	1	14.2	18.5	115	-2.65622	-2.34613	18.5	1.43215	1	1	0	0	0	0	0	0	0	0		1	1	0		1	0	0	3	0	4	0	0	0	0	0	5	0	1	3	0	3	4	5
NA_005_048	4	2	Nachuka	5	Lore Alotee	1	8	0	12.7	25.7	135	-0.045132	1.39958	25.7	3.03094	0	0	0	0	0	0	0	0	0	0		1	0	0		1	0	0	7	0	9	1	0	0	0	0	7	2	0	7	0	7	10	9
NA_005_050	4	2	Nachuka	5	Lore Alotee	1	10	0	16.6	22.1	129	-2.4123	-1.48315	22.1	1.79686	1	0	0	0	0	0	0	0	0	0		1	1	0		1	9	4	9	0	8	5	0	0	0	0	7	1	2	22	0	22	13	8
NA_005_051	4	2	Nachuka	5	Lore Alotee	1	12	0	18.9	33.7	150	-0.988985	0.0337035	33.7	3.30042	0	0		0	0	0	0	0	0	0		1	0	0		1	0	0	7	0	10	2	1	0	0	0	8	0	1	7	0	7	13	8
NA_005_052	4	2	Nachuka	5	Lore Alotee	1	10	0	16.1	22.6	125	-2.25103	-2.11227	22.6	1.91949	1	1	0	0	0	0	0	0	0	0		1	0	0		1	0	2	17	0	9	1	0	0	1	4	4	0	0	19	0	19	10	9
NA_005_053	4	2	Nachuka	5	Lore Koopuwa	1	14	0	22.5	45.4	162	-0.613459	0.365219	45.4	4.04906	0	0	0	0	0	0	0	0	0	0		1	1	0		1	4	3	38	0	11	2	0	1	3	4	7	0	1	45	0	45	14	14
NA_005_054	4	2	Nachuka	5	Lore Koopuwa	1	10	0	17	26.6	135	-1.15203	-0.539469	26.6	2.71007	0	0	0	0	0	0	0	0	0	0		1	1	0		1	0	0	3	0	5	1	1	0	2	0	4	4	1	3	0	3	7	10
NA_005_056	4	2	Nachuka	5	Lore Kaapuun	1	12	1	17.9	29.4	136	-1.64365	-1.71846	29.4	2.94894	0	0	0	0	0	0	0	0	0	0		1	0	0		1	0	0	3	0	1	0	0	1	0	0	2	0	0	3	0	3	2	2
NA_005_058	4	2	Nachuka	5	Lore Alotee	1	8	1	15.2	20.1	123	-1.89573	-0.885506	20.1	2.02148	0	0	1	0	0	0	0	0	0	1	Wound healing followed by peeling of skin on the head	1	0	0		1	2	1	10	0	7	2	0	0	0	0	5	0	1	13	0	13	9	5
NA_005_060	4	2	Nachuka	5	Lore Alotee	1	8	0	14.2	18.1	115	-2.53994	-2.25467	18.1	0.985272	1	1	0	0	0	0	0	0	0	0		1	0	1	1	1	0	0	2	0	1	6	0	0	7	2	4	0	0	2	0	2	7	13
NA_005_061	4	2	Nachuka	5	Lore Koopuwa	1	12	0	19.3	29.1	146	-1.85573	-0.528008	29.1	2.74161	0	0	0	0	0	0	0	0	0	0		1	0	1	1	1	1	6	48	0	16	0	2	2	0	0	9	0	2	55	0	55	20	9
NA_006_003	4	2	Akwapuwa Loluk	6	Lore Apakarengit	1	13	0	18.1	28.6	147	-2.81063	-1.19505	28.6	2.51938	1	0	0	0	0	0	0	0	0	0		1	0	0		1	0	2	9	0	5	0	0	1	0	0	7	0	0	11	0	11	6	7
NA_006_004	4	2	Akwapuwa Loluk	6	Lore Apakarengit	1	8	0	16.4	23.1	129	-0.732517	0.303304	23.1	2.50707	0	0		0	0	0	0	0	0	0		1	0	0		1	0	0	5	0	7	8	0	0	5	5	3	0	0	5	0	5	15	13
NA_006_005	4	2	Akwapuwa Loluk	6	Lore Apakarengit	1	9	0	17.6	26.9	142	-0.424208	1.57118	26.9	2.97385	0	0	0	0	0	0	0	0	0	0		1	1	0		1	0	0	11	0	7	1	0	0	1	4	7	0	0	11	0	11	8	12
NA_006_006	4	2	Angarab	7	Lore Aloyor	1	8	1	15.6	23.5	119	-0.624282	-1.61582	23.5	2.91696	0	0	0	0	0	0	0	0	0	0		1	1	0		1	0	0	3	0	4	0	0	0	0	0	5	2	0	3	0	3	4	7
NA_006_007	4	2	Akwapuwa Loluk	6	Lore Apakarengit	1	8	1	13.9	18.5	120	-2.65622	-1.43324	18.5	1.43215	1	0	0	0	0	0	0	0	0	0		1	0	0		1	0	0	3	0	15	1	0	0	5	4	6	0	1	3	0	3	16	15
NA_006_008	4	2	Akwapuwa Loluk	6	Lore Apakarengit	1	9	1	14.8	21.2	118	-2.2156	-2.63493	21.2	2.0975	1	1	0	0	0	0	0	0	0	0		1	1	0		1	4	0	1	0	12	6	0	0	4	1	7	1	1	5	0	5	18	13
NA_006_009	4	2	Akwapuwa Loluk	6	Lore Apakarengit	1	8	1	14.5	17.4	109	-3.26041	-3.44161	17.4	0.935828	2	2	1	0	1	0	0	0	0	0		1	1	1	3	1	0	6	47	4	13	0	0	0	5	7	9	0	13	53	20	73	13	21
NA_006_010	4	2	Akwapuwa Loluk	6	Lore Apakarengit	1	9	1	15.7	22.9	127	-1.56012	-1.08294	22.9	2.50989	0	0	0	0	0	0	0	0	0	0		1	1	0		1	0	3	8	1	5	3	0	0	6	5	5	0	4	11	5	16	8	16
NA_006_013	4	2	Akwapuwa Loluk	6	Lore Alotimong	1	10	0	24.6	53.5	167	2.33106	4.49349	53.5	4.68023	0	0	0	0	0	0	0	0	0	0		1	0	0		1	0	0	4	0	5	0	0	0	0	0	4	0	2	4	0	4	5	4
NA_006_015	4	2	Akwapuwa Loluk	6	Lore Alotimong	1	8	0	14.7	17	117	-3.06351	-1.88925	17	0.5066	2	0	1	0	1	0	0	0	0	0		1	0	0		1	0	1	9	0	6	0	2	3	1	0	3	2	3	10	0	10	11	6
NA_006_016	4	2	Akwapuwa Loluk	6	Lore Alotimong	1	8	1	16.7	23	132	-0.787628	0.757701	23	2.80829	0	0	0	0	0	0	0	0	0	0		1	1	0		1	2	0	4	1	14	0	1	0	1	0	4	0	2	6	5	11	15	5
NA_006_018	4	2	Akwapuwa Loluk	6	Lore Alotimong	1	8	1	16.9	23.7	127	-0.560878	-0.155192	23.7	2.95862	0	0	0	0	0	0	0	0	0	0		1	1	0		1	4	2	1	0	5	3	0	0	4	1	8	2	2	7	0	7	8	15
NA_006_019	4	2	Akwapuwa Loluk	6	Lore Alotimong	1	14	0	21.4	40.2	157	-1.40264	-0.398838	40.2	3.69991	0	0	0	0	0	0	0	0	0	0		1	1	0		1	2	0	5	0	9	3	0	0	1	0	8	0	1	7	0	7	12	9
NA_006_020	4	2	Akwapuwa Loluk	6	Lore Alotimong	1	8	0	16.6	20.8	118	-1.46726	-1.70654	20.8	1.91328	0	0	0	0	0	0	0	0	0	0		1	1	0		1	1	0	14	1	10	3	1	1	1	1	3	0	1	15	5	20	15	5
NA_006_021	4	2	Akwapuwa Loluk	6	Lore Alotimong	1	14	0	23.4	45.4	166	-0.613459	0.976465	45.4	4.04906	0	0	0	0	0	0	0	0	0	0		1	1	0		1	0	0	2	0	6	2	0	0	3	0	4	0	0	2	0	2	8	7
NA_006_022	4	2	Akwapuwa Loluk	6	Lore Alotimong	1	11	0	17.9	27.2	133	-1.61439	-1.6125	27.2	2.61855	0	0	0	0	0	0	0	0	0	0		1	1	0		1	3	2	2	2	9	2	0	1	5	1	7	3	4	7	10	17	12	16
NA_006_024	4	2	Akwapuwa Loluk	6	Lore Apakarengit	1	10	0	17.5	26.8	138	-1.10457	-0.0676292	26.8	2.74242	0	0	0	0	0	0	0	0	0	0		1	1	0		1	0	0	3	0	8	3	0	0	3	0	1	0	0	3	0	3	11	4
NA_006_025	4	2	Akwapuwa Loluk	6	Lore Apakarengit	1	11	1	17.2	28.5	143	-1.25377	-0.0556425	28.5	2.98794	0	0	1	0	0	0	0	0	0	1	Wounds on the left leg	1	1	0		1	0	0	7	0	9	1	0	0	1	4	8	0	0	7	0	7	10	13
NA_006_026	4	2	Akwapuwa Loluk	6	Lore Apakarengit	1	8	0	17.2	21.9	129	-1.09864	0.303304	21.9	2.2155	0	0	0	0	0	0	0	0	0	0		1	1	0		1	0	0	5	0	8	1	3	0	0	0	4	0	0	5	0	5	12	4
NA_006_027	4	2	Akwapuwa Loluk	6	Lore Apakarengit	1	8	0	15.6	20.1	120	-1.72055	-1.34111	20.1	1.70062	0	0	1	0	1	0	0	0	0	0		1	1	1	1	1	0	0	9	0	4	1	0	0	0	1	1	0	0	9	0	9	5	2
NA_006_029	4	2	Akwapuwa Loluk	6	Lore Apakarengit	1	8	0	13.6	14.1	109	-4.7885	-3.35095	14.1	-1.18622	2	2	1	0	1	0	0	0	0	0		1	1	1	6	1	39	3	12	3	14	2	0	1	0	0	5	0	1	54	15	69	17	5
NA_006_030	4	2	Akwapuwa Loluk	6	Lore Alotimong	1	10	0	18.5	34.7	159	0.384103	3.23525	34.7	3.68106	0	0	0	0	0	0	0	0	0	0		1	1	0		1	0	0	7	0	0	2	1	0	3	3	4	0	0	7	0	7	3	10
NA_006_031	4	2	Akwapuwa Loluk	6	Lore Alotimong	1	8	0	16.1	22.6	133	-0.880839	1.03415	22.6	2.38999	0	0	0	0	0	0	0	0	0	0		1	1	0		1	0	0	8	0	1	4	0	0	6	4	1	0	0	8	0	8	5	11
NA_006_032	4	2	Akwapuwa Loluk	6	Lore Alotimong	1	12	0	19.2	38.3	163	-0.275503	1.85927	38.3	3.70768	0	0	1	0	1	0	0	0	0	0		1	1	0		1	0	0	2	0	2	0	0	1	0	2	0	0	0	2	0	2	3	2
NA_006_033	4	2	Akwapuwa Loluk	6	Lore Alotimong	1	10	0	19	32.2	149	-0.0184993	1.66245	32.2	3.44189	0	0	0	0	0	0	0	0	0	0		1	1	0		1	0	0	3	0	11	1	1	0	0	1	4	0	1	3	0	3	13	5
NA_006_036	4	2	Akwapuwa Loluk	6	Lore Apakarengit	1	9	0	18.9	32.2	149	0.605756	2.76924	32.2	3.64871	0	0	0	0	0	0	0	0	0	0		1	1	0		1	8	4	8	0	10	2	0	0	7	0	5	0	6	20	0	20	12	12
NA_006_037	4	2	Akwapuwa Loluk	6	Lore Adengel	1	8	0	13.7	14.3	105	-4.64955	-4.0818	14.3	-1.04341	2	2	0	0	0	0	0	0	0	0		1	1	1	8	1	27	9	1	3	11	1	1	0	5	0	6	2	7	37	15	52	13	13
NA_006_038	4	2	Akwapuwa Loluk	6	Lore Apakarengit	1	9	0	17.1	26.6	140	-0.493383	1.22887	26.6	2.9261	0	0	0	0	0	0	0	0	0	0		1	1	0		1	0	0	4	0	6	5	0	0	6	3	0	0	0	4	0	4	11	9
NA_006_039	4	2	Akwapuwa Loluk	6	Lore Apakarengit	1	10	0	17.5	27.6	136	-0.920668	-0.382189	27.6	2.86639	0	0	0	0	0	0	0	0	0	0		1	1	0		1	0	0	3	0	7	0	0	0	1	0	1	0	0	3	0	3	7	2
NA_006_040	4	2	Akwapuwa Loluk	6	Lore Alotimong	1	13	0	22.6	52.9	174	0.859489	2.70185	52.9	4.4406	0	0	0	0	0	0	0	0	0	0		1	1	0		1	0	1	5	2	7	4	0	0	13	7	9	1	0	6	10	16	11	30
NA_006_041	4	2	Akwapuwa Loluk	6	Lore Alotimong	1	8	0	14.8	18.1	114	-2.53994	-2.43739	18.1	0.985272	1	1	1	0	1	0	0	0	0	0		1	1	0		1	0	3	8	1	4	3	0	0	2	3	2	0	0	11	5	16	7	7
NA_006_043	4	2	Akwapuwa Loluk	6	Lore Apakarengit	1	8	0	16.2	23.3	134	-0.674784	1.21687	23.3	2.55226	0	0	0	0	0	0	0	0	0	0		1	1	0		1	0	2	4	0	8	0	0	0	2	0	5	0	1	6	0	6	8	7
NA_006_044	4	2	Akwapuwa Loluk	6	Lore Alotimong	1	8	0	17.5	22.7	139	-0.850707	2.13043	22.7	2.41389	0	0	0	0	0	0	0	0	0	0		1	1	0		1	0	1	2	0	8	1	0	0	0	0	5	3	0	3	0	3	9	8
NA_006_045	4	2	Akwapuwa Loluk	6	Lore Alotimong	1	8	1	15.9	23.3	135	-0.688777	1.30544	23.3	2.87428	0	0	0	0	0	0	0	0	0	0		1	1	0		1	2	2	8	1	12	3	2	0	3	0	0	0	3	12	5	17	17	3
NA_006_046	4	2	Akwapuwa Loluk	6	Lore Alotimong	1	9	1	15.6	27.7	142	-0.160632	1.5037	27.7	3.30734	0	0	0	0	0	0	0	0	0	0		1	1	0		1	2	4	3	0	10	1	0	0	2	2	9	0	0	9	0	9	11	13
NA_006_047	4	2	Akwapuwa Loluk	6	Lore Alotimong	1	12	0	17.6	27.2	139	-2.27272	-1.511	27.2	2.44639	1	0	0	0	0	0	0	0	0	0		1	1	0		1	5	0	5	0	12	2	0	0	1	0	2	0	0	10	0	10	14	3
NA_006_048	4	2	Akwapuwa Loluk	6	Lore Alotimong	1	10	0	18.1	26.8	133	-1.10457	-0.854029	26.8	2.74242	0	0	0	0	0	0	0	0	0	0		1	1	0		1	0	1	5	0	10	0	0	0	1	0	2	0	1	6	0	6	10	3
NA_006_049	4	2	Akwapuwa Loluk	6	Lore Apakarengit	1	8	0	17.5	26.3	140	0.0961387	2.31314	26.3	3.13474	0	0	0	0	0	0	0	0	0	0		1	1	0		1	3	1	7	1	7	2	1	0	3	2	6	0	1	11	5	16	10	11
NA_006_050	4	2	Akwapuwa Loluk	6	Lore Alotimong	1	10	1	14.9	21.3	130	-2.94468	-1.35689	21.3	1.89419	1	0	0	0	0	0	0	0	0	0		1	1	0		1	3	2	4	0	4	2	0	0	1	0	4	0	0	9	0	9	6	5
NA_006_051	4	2	Akwapuwa Loluk	6	Lore Apakarengit	1	9	0	16.4	23.9	131	-1.18512	-0.311498	23.9	2.43213	0	0	1	0	1	0	0	0	0	0		1	0	0		1	1	1	2	0	4	1	0	0	0	0	0	0	1	4	0	4	5	0
NA_006_052	4	2	Akwapuwa Loluk	6	Lore Apakarengit	1	10	0	14.4	18.5	120	-3.79141	-2.89867	18.5	0.679831	2	1	0	0	0	0	0	0	0	0		1	0	1	2	1	0	1	18	1	9	0	0	0	1	0	6	0	4	19	5	24	9	7
NA_006_054	4	2	Akwapuwa Loluk	6	Lore Apakarengit	1	8	1	13.6	19.7	125	-2.07425	-0.520349	19.7	1.88672	1	0	0	0	0	0	0	0	0	0		1	0	0		1	1	0	2	0	14	0	1	0	1	0	2	0	1	3	0	3	15	3
NA_006_055	4	2	Akwapuwa Loluk	6	Lore Apakarengit	1	14	0	18.8	36.4	159	-2.06737	-0.0932151	36.4	3.37241	1	0	0	0	0	0	0	0	0	0		1	1	1	2	1	0	9	27	3	12	4	0	0	7	8	4	5	0	36	15	51	16	24
NA_006_057	4	2	Akwapuwa Loluk	6	Lore Alotimong	1	8	1	13.6	17.6	115	-3.14492	-2.34613	17.6	1.03261	2	1	0	0	0	0	0	0	0	0		1	1	0		1	0	1	5	2	6	1	0	1	2	2	2	0	3	6	10	16	8	6
NA_006_058	4	2	Akwapuwa Loluk	6	Lore Adengel	1	8	0	13.9	14.9	105	-4.2528	-4.0818	14.9	-0.641781	2	2	0	0	0	0	0	0	0	0		1	1	1	2	1	1	3	18	0	10	0	0	0	0	0	6	0	2	22	0	22	10	6
NA_006_059	4	2	Akwapuwa Loluk	6	Lore Apakarengit	1	8	0	15.4	21.8	129	-1.13077	0.303304	21.8	2.1895	0	0	0	0	0	0	0	0	0	0		1	1	0		1	7	0	1	5	10	6	2	2	4	1	4	0	4	8	25	33	20	9
NA_006_060	4	2	Akwapuwa Loluk	6	Lore Alotimong	1	8	0	13	17.6	115	-2.77067	-2.25467	17.6	0.776384	1	1	0	0	0	0	0	0	0	0		1	1	1	4	1	3	0	2	0	12	3	1	0	4	0	9	0	3	5	0	5	16	13
NA_006_061	4	2	Akwapuwa Loluk	6	Lore Alotimong	1	9	0	17.2	23.4	123	-1.32877	-1.68072	23.4	2.32584	0	0	0	0	0	0	0	0	0	0		1	1	0		1	9	0	2	0	6	4	0	0	2	1	2	2	2	11	0	11	10	7
NA_006_062	4	2	Akwapuwa Loluk	6	Lore Alotimong	1	8	0	13.7	22	126	-1.06676	-0.244834	22	2.24123	0	0	1	0	1	0	0	0	0	0		1	1	1	9	1	0	3	6	5	18	1	0	0	4	2	7	3	9	9	25	34	19	16
NA_006_063	4	2	Akwapuwa Loluk	6	Lore Alotimong	1	9	0	15	19.2	124	-2.79497	-1.50956	19.2	1.16977	1	0	1	0	1	0	0	0	0	0		1	1	1	3	1	1	0	6	1	11	0	1	0	2	0	2	0	1	7	5	12	12	4
NA_006_064	4	2	Akwapuwa Loluk	6	Lore Apakarengit	1	8	1	14.2	19.2	122	-2.30787	-1.06808	19.2	1.70703	1	0	1	0	1	0	0	0	0	0		1	1	1	3	1	0	1	6	4	16	0	0	0	3	5	9	1	1	7	20	27	16	18
NA_006_066	4	2	Akwapuwa Loluk	6	Lore Apakarengit	1	8	0	15.8	21.7	126	-1.16317	-0.244834	21.7	2.16322	0	0	1	0	1	0	0	0	0	0		1	1	0		1	0	0	6	0	8	1	0	0	0	0	2	0	0	6	0	6	9	2
NA_006_069	4	2	Akwapuwa Loluk	6	Lore Apakarengit	1	8	1	16.1	22.5	120	-0.958252	-1.43324	22.5	2.69277	0	0	1	0	0	0	0	0	1	0		1	1	1	13	1	0	16	68	4	10	5	0	1	9	6	2	2	2	84	20	104	16	19
NA_006_070	4	2	Akwapuwa Loluk	6	Lore Alotimong	1	14	0	23.7	51.1	169	0.12814	1.4349	51.1	4.34086	0	0	0	0	0	0	0	0	0	0		1	0	0		1	0	0	2	0	3	1	0	0	1	0	0	0	0	2	0	2	4	1
NA_006_071	4	2	Akwapuwa Loluk	6	Lore Alotimong	1	13	0	21.2	40.8	157	-0.613476	0.248247	40.8	3.80788	0	0	0	0	0	0	0	0	0	0		1	0	0		1	0	0	1	0	5	0	0	0	2	0	2	1	0	1	0	1	5	5
NA_006_072	4	2	Akwapuwa Loluk	6	Lore Alotimong	1	10	1	16.4	30.7	142	-0.129652	0.583834	30.7	3.39802	0	0	0	0	0	0	0	0	0	0		1	1	1	1	1	27	6	4	0	7	3	1	1	4	3	3	0	5	37	0	37	12	10
NA_006_073	4	2	Akwapuwa Loluk	6	Lore Adengel	1	9	1	15.2	22.4	125	-1.74211	-1.42783	22.4	2.39783	0	0	0	0	0	0	0	0	0	0		1	1	0		1	0	0	6	1	15	1	1	0	2	0	8	1	5	6	5	11	17	11
NA_006_074	4	2	Akwapuwa Loluk	6	Lore Adengel	1	11	1	15.2	27.9	134	-1.4073	-1.40913	27.9	2.91414	0	0	0	0	0	0	0	0	0	0		1	1	0		1	0	0	6	0	2	1	1	0	2	0	1	0	1	6	0	6	4	3
NA_006_075	4	2	Akwapuwa Loluk	6	Lore Adengel	1	9	1	14.9	26.5	131	-0.460868	-0.39317	26.5	3.14603	0	0	0	0	0	0	0	0	0	0		1	1	0		1	3	0	11	0	5	0	1	1	1	0	6	1	3	14	0	14	7	8
NA_006_076	4	2	Akwapuwa Loluk	6	Lore Adengel	1	10	1	14.1	20	135	-3.55415	-0.548254	20	1.51561	2	0	0	0	0	0	0	0	0	0		1	1	0		1	6	0	5	0	4	0	0	0	1	0	3	5	1	11	0	11	4	9
NA_006_077	4	2	Akwapuwa Loluk	6	Lore Adengel	1	8	1	12.7	18	114	-2.92167	-2.52871	18	1.21714	1	1	1	0	0	0	0	0	0	1	Skin rashes	1	1	0		1	0	0	1	2	8	0	0	0	1	0	6	1	2	1	10	11	8	8
NA_006_078	4	2	Akwapuwa Loluk	6	Lore Alotimong	1	14	0	21.4	43.1	158	-0.947409	-0.246027	43.1	3.90637	0	0	0	0	0	0	0	0	0	0		1	1	0		1	1	0	8	0	5	0	1	0	3	0	2	0	0	9	0	9	6	5
NA_007_001	4	2	Angarab	7	Lore Anangiro	1	14	0	20.1	42.9	167	-0.977527	1.12928	42.9	3.89314	0	0	1	0	0	0	0	0	0	1	Wounds	1	1	1	1	1	0	0	1	0	18	6	0	0	1	0	3	0	0	1	0	1	24	4
NA_007_002	4	2	Angarab	7	Lore Kootyang	1	13	0	20.2	44.5	162	-0.109157	0.969894	44.5	4.04315	0	0	0	0	0	0	0	0	0	0		1	0	0		1	0	0	2	0	16	4	0	0	5	0	3	5	2	2	0	2	20	13
NA_007_003	4	2	Angarab	7	Lore Kaabura	1	14	0	24.9	50.8	161	0.0918055	0.212408	50.8	4.32734	0	0	0	0	0	0	0	0	0	0		1	0	0		1	0	0	13	0	14	1	0	0	2	0	3	2	0	13	0	13	15	7
NA_007_004	4	2	Angarab	7	Lore Aloyor	1	10	0	19.8	41.6	170	1.27455	4.96533	41.6	4.17073	0	0	0	0	0	0	0	0	0	0		1	1	0		1	0	0	6	0	3	0	0	0	1	0	2	0	1	6	0	6	3	3
NA_007_005	4	2	Angarab	7	Lore Aloyor	1	12	0	19.6	34.3	150	-0.888296	0.0337035	34.3	3.3607	0	0	0	0	0	0	0	0	0	0		1	1	0		1	0	0	2	0	2	0	0	0	0	0	4	0	0	2	0	2	2	4
NA_007_006	4	2	Angarab	7	Lore Aloyor	1	8	1	15.6	23.5	119	-0.624282	-1.61582	23.5	2.91696	0	0	0	0	0	0	0	0	0	0		1	1	0		1	0	0	3	0	4	0	0	0	0	0	5	2	0	3	0	3	4	7
NA_007_007	4	2	Angarab	7	Lore Kaabura	1	8	1	15.4	16.5	108	-3.81482	-3.62418	16.5	0.458753	2	2	0	0	0	0	0	0	0	0		1	1	0		1	6	0	1	0	15	3	1	2	1	0	1	1	5	7	0	7	21	3
NA_007_008	4	2	Angarab	7	Lore Aloyor	1	12	0	21.1	34.7	146	-0.822548	-0.528008	34.7	3.39956	0	0	0	0	0	0	0	0	0	0		1	1	0		1	0	0	6	0	13	0	1	0	0	0	1	0	0	6	0	6	14	1
NA_007_009	4	2	Angarab	7	Lore Kaabura	1	8	1	14.6	20	117	-1.93969	-1.98098	20	1.9885	0	0	0	0	0	0	0	0	0	0		1	1	1	2	1	1	7	5	0	12	2	0	0	2	0	6	0	1	13	0	13	14	8
NA_007_011	4	2	Angarab	7	Lore Kootyang	1	9	1	16.3	29	137	0.135356	0.641489	29	3.46099	0	0	0	0	0	0	0	0	0	0		1	1	0		1	0	2	4	0	5	1	0	0	1	0	3	0	2	6	0	6	6	4
NA_007_012	4	2	Angarab	7	Lore Aloyor	1	10	0	18.3	29	139	-0.620027	0.0896507	29	3.06421	0	0	0	0	0	0	0	0	0	0		1	1	0		1	0	0	1	0	4	0	0	0	0	0	3	0	0	1	0	1	4	3
NA_007_013	4	2	Angarab	7	Lore Aloyor	1	9	1	16.2	25.2	127	-0.819953	-1.08294	25.2	2.94602	0	0	0	0	0	0	0	0	0	0		1	1	0		1	1	3	1	0	8	1	0	0	0	0	1	0	0	5	0	5	9	1
NA_007_014	4	2	Angarab	7	Lore Aloyor	1	9	1	14	19.5	116	-2.99109	-2.97982	19.5	1.57875	1	1	0	0	0	0	0	0	0	0		1	1	0		1	0	0	3	0	2	0	0	0	0	0	0	0	0	3	0	3	2	0
NA_007_015	4	2	Angarab	7	Lore Aloyor	1	9	1	14.5	24.5	140	-1.02984	1.15882	24.5	2.82559	0	0	1	1	0	0	0	0	0	1	Wounds	1	1	0		1	0	0	8	0	5	2	0	0	3	0	3	0	0	8	0	8	7	6
NA_007_016	4	2	Angarab	7	Lore Anangiro	1	10	0	18.5	34.5	140	0.353752	0.246931	34.5	3.66341	0	0	0	0	0	0	0	0	0	0		1	1	1	1	1	0	0	2	0	3	3	0	0	2	0	5	0	1	2	0	2	6	7
NA_007_017	4	2	Angarab	7	Lore Aloyor	1	10	1	19.5	33.2	147	0.339938	1.39247	33.2	3.60745	0	0	0	0	0	0	0	0	0	0		1	1	0		1	0	0	4	0	5	0	0	0	0	0	5	0	0	4	0	4	5	5
NA_007_018	4	2	Angarab	7	Lore Aloyor	1	9	0	17.7	24.5	129	-1.01967	-0.653803	24.5	2.55298	0	0	0	0	0	0	0	0	0	0		1	1	1	1	1	0	0	7	0	6	0	0	0	0	3	7	0	0	7	0	7	6	10
NA_007_019	4	2	Angarab	7	Lore Aloyor	1	8	1	15.5	19.4	115	-2.21297	-2.34613	19.4	1.78047	1	1	1	0	1	0	0	0	0	0		1	1	0		1	1	0	9	0	4	0	0	1	2	0	4	0	3	10	0	10	5	6
NA_007_020	4	2	Angarab	7	Lore Aloyor	1	8	0	14.5	18.2	110	-2.49516	-3.16824	18.2	1.02544	1	2	0	0	0	0	0	0	0	0		1	1	0		1	1	0	4	0	4	6	0	0	13	0	1	0	1	5	0	5	10	14
NA_007_021	4	2	Angarab	7	Lore Aloyor	1	13	0	20.6	36.1	149	-1.34574	-0.906389	36.1	3.4284	0	0	1	0	0	0	0	0	0	1	Wounds	1	1	1	2	1	1	0	8	0	4	0	0	0	0	0	5	0	0	9	0	9	4	5
NA_007_022	4	2	Angarab	7	Lore Kootyang	1	8	1	14.9	23.4	119	-0.656391	-1.61582	23.4	2.89575	0	0	0	0	0	0	0	0	0	0		1	1	0		1	0	0	1	0	1	1	0	0	0	0	0	0	1	1	0	1	2	0
NA_007_024	4	2	Angarab	7	Lore Kaabura	1	9	1	16.1	29.4	134	0.220927	0.124159	29.4	3.50441	0	0	0	0	0	0	0	0	0	0		1	1	0		1	3	4	2	0	10	3	0	0	6	1	2	0	9	9	0	9	13	9
NA_007_025	4	2	Angarab	7	Lore Aloyor	1	14	0	21.1	47.2	162	-0.366907	0.365219	47.2	4.14983	0	0	0	0	0	0	0	0	0	0		1	1	1	1	1	0	0	5	0	7	2	0	0	1	1	1	5	0	5	0	5	9	8
NA_007_027	4	2	Angarab	7	Lore Aloyor	1	8	1	13.6	19.5	126	-2.16626	-0.33777	19.5	1.8164	1	0	1	0	1	0	0	0	0	0		1	0	0		1	2	0	6	0	4	1	0	1	0	0	7	0	1	8	0	8	6	7
NA_007_029	4	2	Angarab	7	Lore Kaabura	1	8	0	16.4	21.4	128	-1.26199	0.120591	21.4	2.08264	0	0	1	0	1	0	0	0	0	0		1	1	0		1	2	9	17	1	14	2	0	0	5	4	9	0	4	28	5	33	16	18
NA_007_030	4	2	Angarab	7	Lore Kaabura	1	9	0	16.6	25.4	147	-0.78461	2.42694	25.4	2.72176	0	0	0	0	0	0	0	0	0	0		1	1	0		1	1	6	12	0	11	1	0	0	3	0	7	0	0	19	0	19	12	10
NA_007_038	4	2	Angarab	7	Lore Aloyor	1	12	0	21.1	34.7	146	-0.822548	-0.528008	34.7	3.39956	0	0	0	0	0	0	0	0	0	0		1	1	0		1	0	0	6	0	13	0	0	0	0	0	1	0	0	6	0	6	13	1
NA_008_001	4	5	Naronit	8	Lore Amaide	1	9	0	17.2	22.8	126	-1.50856	-1.16726	22.8	2.19104	0	0	0	0	0	0	0	0	0	0		1	1	0		1	3	3	21	0	10	8	0	0	7	7	8	0	2	27	0	27	18	22
NA_008_002	4	5	Naronit	8	Lore Ateko	1	8	1	16	26.1	134	0.123997	1.12286	26.1	3.39027	0	0	0	0	0	0	0	0	0	0		1	1	0		1	0	0	6	0	3	1	0	0	0	0	0	0	0	6	0	6	4	0
NA_008_003	4	5	Naronit	8	Lore Ateko	1	10	1	16.3	23.8	125	-1.96795	-2.16552	23.8	2.46252	0	1	0	0	0	0	0	0	0	0		1	1	0		1	0	1	2	0	5	0	0	0	0	0	3	2	1	3	0	3	5	5
NA_008_004	4	5	Naronit	8	Lore Ateko	1	9	0	17.5	29.9	143	0.198865	1.74233	29.9	3.39027	0	0	1	0	1	0	0	0	0	0		1	0	0		1	0	1	2	0	3	0	0	0	0	0	1	0	1	3	0	3	3	1
NA_008_005	4	5	Naronit	8	Lore Amaide	1	8	0	16.2	25.1	141	-0.192429	2.49586	25.1	2.9213	0	0	0	0	0	0	0	0	0	0		1	1	1	1	1	1	10	7	4	17	1	0	0	0	0	9	0	0	18	20	38	18	9
NA_008_006	4	5	Naronit	8	Lore Ateko	1	8	1	14.3	17.4	111	-3.26041	-3.07645	17.4	0.935828	2	2	0	0	0	0	0	0	0	0		1	0	0		1	0	0	2	0	7	0	0	0	0	0	1	0	0	2	0	2	7	1
NA_008_007	4	5	Naronit	8	Lore Akodet	1	8	1	15.3	20.1	127	-1.89573	-0.155192	20.1	2.02148	0	0	0	0	0	0	0	0	0	0		1	1	0		1	0	0	4	0	3	0	0	0	0	0	0	0	1	4	0	4	3	0
NA_008_009	4	5	Naronit	8	Lore Alokawa	1	10	0	17.4	27.4	139	-0.965774	0.0896507	27.4	2.83619	0	0	0	0	0	0	0	0	0	0		1	0	0		1	0	0	1	1	5	0	0	0	0	0	2	0	0	1	5	6	5	2
NA_008_011	4	5	Naronit	8	Lore Ateko	1	9	0	15	20.9	126	-2.13821	-1.16726	20.9	1.7035	1	0	1	0	1	0	0	0	0	0		1	1	0		1	14	2	3	0	8	2	1	0	2	2	3	0	5	19	0	19	11	7
NA_008_012	4	5	Naronit	8	Lore Abule	1	14	1	20.5	45.1	165	-0.474221	0.318203	45.1	3.9075	0	0	0	0	0	0	0	0	0	0		1	1	0		1	0	0	1	0	3	1	0	0	0	0	0	0	0	1	0	1	4	0
NA_008_015	4	5	Naronit	8	Lore Alokawa	1	13	0	22.7	42.5	165	-0.374782	1.40288	42.5	3.92178	0	0	0	0	0	0	0	0	0	0		1	1	0		1	0	1	11	0	12	0	0	0	1	5	6	0	0	12	0	12	12	12
NA_008_017	4	5	Naronit	8	Lore Ateko	1	14	0	22.3	47.2	164	-0.366907	0.670842	47.2	4.14983	0	0	0	0	0	0	0	0	0	0		1	0	0		1	3	0	21	0	8	1	0	0	3	7	5	1	7	24	0	24	9	16
NA_008_018	4	5	Naronit	8	Lore Alokawa	1	10	1	18	33.8	141	0.441822	0.422107	33.8	3.65124	0	0	0	0	0	0	0	0	0	0		1	0	0		1	0	0	1	0	1	0	0	0	0	0	1	0	0	1	0	1	1	1
NA_008_019	4	5	Naronit	8	Lore Alokawa	1	10	0	17.4	27.3	145	-0.98854	1.03333	27.3	2.82089	0	0	1	0	0	0	0	0	0	1	skin rash	1	1	0		1	0	0	16	0	14	4	3	0	6	0	10	0	8	16	0	16	21	16
NA_008_020	4	5	Naronit	8	Lore Alokawa	1	10	0	18.5	28.5	145	-0.724472	1.03333	28.5	2.99616	0	0	0	0	0	0	0	0	0	0		1	1	0		1	0	0	1	0	6	1	0	0	0	1	1	0	0	1	0	1	7	2
NA_008_022	4	5	Naronit	8	Lore Alokawa	1	10	1	16.6	24.5	126	-1.73182	-2.0038	24.5	2.59267	0	1	0	0	0	0	0	0	0	0		1	1	0		1	5	6	4	0	2	2	0	0	2	1	4	0	4	15	0	15	4	7
NA_008_024	4	5	Naronit	8	Lore Alokawa	1	14	0	25.4	49.3	145	-0.0940892	-2.23258	49.3	4.25693	0	1	0	0	0	0	0	0	0	0		1	0	1	2	1	1	1	11	0	9	5	0	1	9	5	6	1	2	13	0	13	15	21
NA_008_025	4	5	Naronit	8	Lore Akodet	1	8	1	15.5	24.1	128	-0.437235	0.0273871	24.1	3.03904	0	0	0	0	0	0	0	0	0	0		1	1	0		1	2	3	14	1	9	2	0	0	0	10	5	6	2	19	5	24	11	21
NA_008_026	4	5	Naronit	8	Lore Akodet	1	8	1	15.2	18.4	113	-2.70816	-2.71129	18.4	1.39046	1	1	0	0	0	0	0	0	0	0		1	0	0		1	1	1	11	0	13	1	0	0	1	0	7	0	5	13	0	13	14	8
NA_008_027	4	5	Naronit	8	Lore Abule	1	8	1	14.7	22.9	127	-0.821155	-0.155192	22.9	2.78576	0	0	1	0	1	0	0	0	0	0		1	0	1	17	1	0	18	42	0	14	3	0	0	2	7	8	1	0	60	0	60	17	18
NA_008_028	4	5	Naronit	8	Lore Abule	1	10	1	16.7	27.4	137	-0.887793	-0.2248	27.4	3.03408	0	0	0	0	0	0	0	0	0	0		1	0	0		1	0	0	1	0	2	1	1	0	1	0	1	3	1	1	0	1	4	5
NA_008_029	4	5	Naronit	8	Lore Amaide	1	10	1	16	25.6	131	-1.38806	-1.19516	25.6	2.77697	0	0	1	0	0	0	0	0	0	1	wounds	1	0	0		1	0	1	3	0	12	0	0	0	1	0	8	0	1	4	0	4	12	9
NA_008_030	4	5	Naronit	8	Lore Amaide	1	8	1	15.3	18.5	116	-2.65622	-2.16356	18.5	1.43215	1	1	0	0	0	0	0	0	0	0		1	1	0		1	1	1	11	0	7	3	2	1	4	6	8	0	3	13	0	13	13	18
NA_008_031	4	5	Naronit	8	Lore Amaide	1	10	1	18.2	28.1	136	-0.711358	-0.386527	28.1	3.12158	0	0	1	0	0	0	0	0	0	1	wounds	1	1	1	2	1	0	0	1	0	8	1	0	0	2	1	7	0	0	1	0	1	9	10
NA_008_032	4	5	Naronit	8	Lore Amaide	1	12	0	17.6	24.5	133	-2.94202	-2.35357	24.5	1.93488	1	1	0	0	0	0	0	0	0	0		1	1	0		1	0	0	1	0	3	0	0	0	0	0	0	0	1	1	0	1	3	0
NA_008_034	4	5	Naronit	8	Lore Amaide	1	8	0	17.9	20.9	117	-1.43231	-1.88925	20.9	1.9423	0	0	1	0	1	0	0	0	0	0		1	1	0		1	0	0	1	0	1	0	0	0	0	9	9	0	0	1	0	1	1	18
NA_008_035	4	5	Naronit	8	Lore Amaide	1	10	0	18.4	26.8	139	-1.10457	0.0896507	26.8	2.74242	0	0	0	0	0	0	0	0	0	0		1	1	0		1	0	2	6	0	11	15	0	0	14	5	9	1	0	8	0	8	26	29
NA_008_036	4	5	Naronit	8	Lore Akodet	1	8	1	15.8	22.9	130	-0.821155	0.392544	22.9	2.78576	0	0	1	0	0	0	0	0	0	1	wounds	1	0	0		1	0	3	2	0	13	1	1	0	1	1	8	0	1	5	0	5	15	10
NA_008_037	4	5	Naronit	8	Lore Amaide	1	8	1	16.4	26.9	132	0.325067	0.757701	26.9	3.51054	0	0	1	0	1	0	0	0	0	0		1	1	0		1	0	0	1	0	5	1	2	0	0	4	4	2	1	1	0	1	8	10
NA_008_038	4	5	Naronit	8	Lore Ateko	1	13	0	22.7	39.2	162	-0.850067	0.969894	39.2	3.69032	0	0	0	0	0	0	0	0	0	0		1	0	0		1	0	0	11	0	17	3	0	0	8	0	9	0	0	11	0	11	20	17
NA_008_039	4	5	Naronit	8	Lore Ateko	1	8	0	14.7	17.8	118	-2.67699	-1.70654	17.8	0.86159	1	0	0	0	0	0	0	0	0	0		1	1	0		1	1	1	2	0	6	0	0	0	0	2	5	0	0	4	0	4	6	7
NA_008_040	4	5	Naronit	8	Lore Ateko	1	8	0	14.1	14.6	112	-4.44753	-2.80281	14.6	-0.837757	2	1	0	0	0	0	0	0	0	0		1	1	0		1	0	0	5	0	3	1	0	0	0	0	1	0	0	5	0	5	4	1
NA_008_041	4	5	Naronit	8	Lore Amaide	1	8	1	15.7	16.7	113	-3.68644	-2.71129	16.7	0.571056	2	1	1	0	1	0	0	0	0	0		1	1	0		1	2	1	9	0	12	0	0	0	0	0	8	2	1	12	0	12	12	10
NA_008_042	4	5	Naronit	8	Lore Alokawa	1	8	0	16.6	20.5	125	-1.57391	-0.427547	20.5	1.82422	0	0	1	0	1	0	0	0	0	0		1	0	0		1	1	0	3	0	6	0	0	0	0	0	2	0	0	4	0	4	6	2
NA_008_043	4	5	Naronit	8	Lore Kaapuru	1	10	1	16.6	26.8	135	-1.04672	-0.548254	26.8	2.95384	0	0	0	0	0	0	0	0	0	0		1	1	0		1	0	1	1	0	3	6	0	0	12	10	9	1	2	2	0	2	9	32
NA_008_046	4	5	Naronit	8	Lore Ateko	1	10	1	18.1	29.6	141	-0.362686	0.422107	29.6	3.28951	0	0	0	0	0	0	0	0	0	0		1	1	0		1	2	0	0	0	5	0	0	0	0	0	4	1	1	2	0	2	5	5
NA_008_047	4	5	Naronit	8	Lore Aloporon	1	8	1	15.1	22.1	120	-1.10032	-1.43324	22.1	2.595	0	0	1	0	1	0	0	0	0	0		1	1	0		1	0	0	8	0	5	0	1	0	2	2	4	0	1	8	0	8	6	8
NA_008_050	4	5	Naronit	8	Lore Ateko	1	10	1	17.1	26.7	137	-1.07394	-0.2248	26.7	2.93996	0	0	0	0	0	0	0	0	0	0		1	1	0		1	3	4	1	0	14	0	0	0	5	0	10	0	0	8	0	8	14	15
NA_008_053	4	5	Naronit	8	Lore Ateko	1	10	0	16.7	20.5	124	-2.97359	-2.26955	20.5	1.35694	1	1	1	0	0	0	0	0	0	1	Skin rushes	1	1	0		1	0	0	3	0	8	4	0	0	0	0	6	2	0	3	0	3	12	8
NA_008_054	4	5	Naronit	8	Lore Akodet	1	9	1	15.5	22.2	127	-1.81731	-1.08294	22.2	2.35098	0	0	0	0	0	0	0	0	0	0		1	1	0		1	1	0	3	0	3	1	0	0	0	0	2	2	0	4	0	4	4	4
NA_008_055	4	5	Naronit	8	Lore Alotee	1	9	1	18.3	25.6	129	-0.705401	-0.738056	25.6	3.01066	0	0	1	0	1	0	0	0	0	0		2	0	0		1	0	1	2	0	4	3	1	0	0	0	0	0	0	3	0	3	8	0
NA_008_058	4	5	Naronit	8	Lore Ateko	1	8	1	14.1	18.5	116	-2.65622	-2.16356	18.5	1.43215	1	1	1	0	1	0	0	0	0	0		1	0	0		1	0	0	2	1	5	0	2	0	1	1	6	1	2	2	5	7	7	9
NA_008_060	4	5	Naronit	8	Lore Abule	1	10	0	21.6	40.5	155	1.15023	2.60613	40.5	4.10565	0	0	0	0	0	0	0	0	0	0		1	1	0		1	1	1	18	0	12	2	0	0	2	5	7	0	1	20	0	20	14	14
NA_009_001	4	7	Longaroi	9	Lore Akanyangareng	1	11	0	21.6	35.1	143	-0.139001	-0.162409	35.1	3.56175	0	0	0	0	0	0	0	0	0	0		1	1	0		1	0	0	4	0	3	0	0	0	0	0	1	0	0	4	0	4	3	1
NA_009_003	4	7	Longaroi	9	Lore Apathiya	1	12	1	15.8	26.4	136	-2.43862	-1.71846	26.4	2.54521	1	0	0	0	0	0	0	0	0	0		1	0	0		1	0	0	15	0	11	1	1	0	0	0	3	0	2	15	0	15	13	3
NA_009_004	4	7	Longaroi	9	Lore Angimiroo	1	13	0	19.3	37.7	155	-1.08339	-0.0404121	37.7	3.56972	0	0	0	0	0	0	0	0	0	0		1	1	0		1	0	3	20	0	12	0	0	2	2	0	3	2	6	23	0	23	14	7
NA_009_005	4	7	Longaroi	9	Lore Angimiroo	1	13	1	18	33.7	151	-1.43939	-0.480638	33.7	3.26755	0	0	0	0	0	0	0	0	0	0		1	1	0		1	0	3	8	0	10	1	1	0	5	6	7	0	6	11	0	11	12	18
NA_009_007	4	7	Longaroi	9	Lore Angakimak	1	12	1	15.1	24.4	134	-3.0685	-1.99653	24.4	2.19601	2	0	0	0	0	0	0	0	0	0		1	0	0		1	1	0	18	0	13	6	1	0	4	5	8	0	2	19	0	19	20	17
NA_009_009	4	7	Longaroi	9	Lore Apalowal	1	14	1	20.3	40.7	162	-1.05883	-0.0433914	40.7	3.69289	0	0	1	0	0	0	0	0	1	0		1	1	0		1	0	1	12	0	14	6	0	1	5	9	10	0	0	13	0	13	21	24
NA_009_011	4	7	Longaroi	9	Lore Angimiroo	1	12	1	15.9	27.4	140	-2.15573	-1.16232	27.4	2.69359	1	0	1	0	0	0	0	0	0	1	wound on the left legg	1	1	0		1	0	0	9	0	11	2	2	0	1	0	8	0	3	9	0	9	15	9
NA_009_012	4	7	Longaroi	9	Lore Angimiroo	1	10	1	19.2	34.4	147	0.539982	1.39247	34.4	3.69285	0	0	0	0	0	0	0	0	0	0		1	1	0		1	13	6	14	1	16	0	0	1	2	2	9	1	8	33	5	38	17	14
NA_009_015	4	7	Longaroi	9	Lore Adengel	1	12	0	19.4	30.8	139	-1.5141	-1.511	30.8	2.97054	0	0	0	0	0	0	0	0	0	0		1	1	0		1	0	0	4	0	5	0	0	0	0	0	0	0	0	4	0	4	5	0
NA_009_016	4	7	Longaroi	9	Lore Angakimak	1	11	0	19.5	32.9	145	-0.492536	0.127608	32.9	3.35155	0	0	0	0	0	0	0	0	0	0		1	1	0		1	0	0	2	0	2	0	0	0	0	0	7	1	0	2	0	2	2	8
NA_009_018	4	7	Longaroi	9	Lore Kaachuka	1	10	1	15.8	24.8	132	-1.6349	-1.03343	24.8	2.64525	0	0	0	0	0	0	0	0	0	0		1	1	0		1	0	0	1	0	1	0	0	0	0	0	0	0	1	1	0	1	1	0
NA_009_019	4	7	Longaroi	9	Lore Kookudet	1	10	0	18.5	28.8	139	-0.66143	0.0896507	28.8	3.03732	0	0	0	0	0	0	0	0	0	0		1	1	0		1	0	0	3	0	3	1	0	0	1	1	4	0	0	3	0	3	4	6
NA_009_020	4	7	Longaroi	9	Lore Kookudet	1	10	0	17.4	26.5	135	-1.17599	-0.539469	26.5	2.69367	0	0	1	0	1	0	0	0	0	0		1	1	0		1	1	0	15	0	8	1	0	0	0	0	7	0	1	16	0	16	9	7
NA_009_021	4	7	Longaroi	9	Lore Kaalbert	1	10	0	18.6	25.3	132	-1.47623	-1.01131	25.3	2.48508	0	0	0	0	0	0	0	0	0	0		1	1	0		1	0	0	3	0	6	1	0	0	0	0	0	0	3	3	0	3	7	0
NA_009_022	4	7	Longaroi	9	Lore Adengel	1	10	0	17.5	26.5	137	-1.17599	-0.224909	26.5	2.69367	0	0	0	0	0	0	0	0	0	0		1	0	0		1	0	0	1	0	0	1	1	0	0	0	4	0	1	1	0	1	2	4
NA_009_025	4	7	Longaroi	9	Lore Angimiroo	1	10	1	16.5	28.5	140	-0.614615	0.26038	28.5	3.16884	0	0	1	0	1	0	0	0	0	0		1	1	0		1	0	0	8	0	3	0	0	0	0	2	4	0	5	8	0	8	3	6
NA_009_028	4	7	Longaroi	9	Lore Akanyangareng	1	12	1	18.5	32.5	147	-0.965999	-0.189086	32.5	3.26077	0	0	0	0	0	0	0	0	0	0		1	1	0		1	0	0	3	0	5	0	1	0	0	0	6	0	2	3	0	3	6	6
NA_009_030	4	7	Longaroi	9	Lore Kaalbert	1	10	1	18.8	27.8	137	-0.785833	-0.2248	27.8	3.08485	0	0	0	0	0	0	0	0	0	0		1	1	0		1	0	0	4	0	4	0	1	0	0	2	10	0	0	4	0	4	5	12
NA_009_031	4	7	Longaroi	9	Lore Angimiroo	1	10	0	18.3	29	142	-0.620027	0.561491	29	3.06421	0	0	0	0	0	0	0	0	0	0		1	1	0		1	0	0	1	0	0	2	0	0	0	10	9	1	0	1	0	1	2	20
NA_009_032	4	7	Longaroi	9	Lore Angimiroo	1	10	1	17.5	27.4	133	-0.887793	-0.871708	27.4	3.03408	0	0	0	0	0	0	0	0	0	0		1	1	1	2	1	10	1	15	2	10	0	0	2	3	2	8	0	11	26	10	36	12	13
NA_009_033	4	7	Longaroi	9	Lore Apathiya	1	8	0	15.4	21.3	125	-1.29548	-0.427547	21.3	2.05519	0	0	1	0	0	0	0	0	0	1	Dead skin	1	1	0		1	0	0	3	0	2	0	0	0	0	3	6	0	0	3	0	3	2	9
NA_009_034	4	7	Longaroi	9	Lore Apathiya	1	12	1	17.3	31	149	-1.27822	0.0889816	31	3.12077	0	0	1	0	1	0	0	0	0	0		1	1	0		1	0	4	10	0	8	0	0	2	0	0	3	0	9	14	0	14	10	3
NA_009_035	4	7	Longaroi	9	Lore Kaachuka	1	9	0	18	24.8	134	-0.939624	0.201958	24.8	2.61084	0	0	0	0	0	0	0	0	0	0		1	1	0		1	0	0	2	0	2	0	0	0	0	3	6	1	2	2	0	2	2	10
NA_009_036	4	7	Longaroi	9	Lore Kaachuka	1	8	1	18.2	26.7	131	0.275932	0.575123	26.7	3.48142	0	0	0	0	0	0	0	0	0	0		1	0	0		1	0	2	1	0	4	5	0	0	0	6	7	0	2	3	0	3	9	13
NA_009_042	4	7	Longaroi	9	Lore Akanyangareng	1	11	0	17.3	26.9	143	-1.6838	-0.162409	26.9	2.56986	0	0	0	0	0	0	0	0	0	0		1	0	0		1	0	0	5	0	6	1	0	0	0	5	8	0	0	5	0	5	7	13
NA_009_043	4	7	Longaroi	9	Lore Akanyangareng	1	10	1	15.5	24.1	138	-1.86499	-0.0630734	24.1	2.51962	0	0	0	0	0	0	0	0	0	0		1	0	0		1	0	0	4	0	1	0	0	0	0	0	2	0	0	4	0	4	1	2
NA_009_044	4	7	Longaroi	9	Lore Angakimak	1	12	1	18.3	20.9	132	-4.43672	-2.27459	20.9	1.34717	2	1	0	0	0	0	0	0	0	0		2	0	0		1	1	0	0	0	0	0	0	0	0	0	0	0	0	1	0	1	0	0
NA_009_045	4	7	Longaroi	9	Lore Angimiroo	1	8	0	18.4	24.5	127	-0.346163	-0.0621217	24.5	2.80533	0	0	0	0	0	0	0	0	0	0		1	1	0		1	1	0	6	0	4	1	1	0	1	2	6	1	3	7	0	7	6	10
NA_009_046	4	7	Longaroi	9	Lore Alomilimil	1	8	1	15.4	18	115	-2.92167	-2.34613	18	1.21714	1	1	0	0	0	0	0	0	0	0		1	0	0		1	1	5	3	0	4	1	0	1	0	2	6	0	2	9	0	9	6	8
NA_009_047	4	7	Longaroi	9	Lore Alomilimil	1	12	0	20.2	32.3	149	-1.23414	-0.106724	32.3	3.14967	0	0	0	0	0	0	0	0	0	0		1	1	0		1	0	0	6	0	5	1	0	0	0	3	4	0	1	6	0	6	6	7
NA_009_048	4	7	Longaroi	9	Lore Kaachuka	1	12	1	16.5	28.8	140	-1.79035	-1.16232	28.8	2.87752	0	0	0	0	0	0	0	0	0	0		1	1	0		1	0	4	4	0	8	0	1	0	0	0	4	0	0	8	0	8	9	4
NA_009_052	4	7	Longaroi	9	Lore Angimiroo	1	9	1	14.5	18.2	119	-3.68671	-2.46249	18.2	1.08567	2	1	0	0	0	0	0	0	0	0		1	1	0		1	0	0	2	0	3	0	0	0	0	4	8	1	0	2	0	2	3	13
NA_009_053	4	7	Longaroi	9	Lore Kaachuka	1	10	1	18.1	24.9	128	-1.60313	-1.68034	24.9	2.66238	0	0	0	0	0	0	0	0	0	0		1	0	0		1	0	0	2	0	1	2	0	0	0	0	6	0	2	2	0	2	3	6
NA_009_054	4	7	Longaroi	9	Lore Apathiya	1	11	1	16.8	25.7	131	-2.03219	-1.86029	25.7	2.60062	1	0	1	0	0	0	0	0	1	1	skin peeling on the legs	1	1	0		1	0	0	8	0	8	0	0	0	0	0	4	0	5	8	0	8	8	4
NA_009_057	4	7	Longaroi	9	Lore Aloteng	1	11	0	19	32.6	146	-0.543681	0.272617	32.6	3.32032	0	0	0	0	0	0	0	0	0	0		1	1	0		1	0	9	33	0	10	0	0	0	0	4	7	0	2	42	0	42	10	11
NA_009_058	4	7	Longaroi	9	Lore Akanyangareng	1	13	1	19.7	32.3	150	-1.71292	-0.608128	32.3	3.14072	0	0	1	0	0	0	0	0	0	1	Big septic wound on the right leg.	1	1	0		1	3	1	7	0	7	0	0	0	0	1	7	1	5	11	0	11	7	9
NA_009_059	4	7	Longaroi	9	Lore Angimiroo	1	12	1	17.2	20.4	120	-4.66749	-3.943	20.4	1.19172	2	2	0	0	0	0	0	0	0	0		1	1	0		1	0	1	8	0	5	0	0	0	0	1	4	0	1	9	0	9	5	5
NA_009_062	4	7	Longaroi	9	Lore Alogir	1	8	0	18.3	25.1	152	-0.192429	4.5057	25.1	2.9213	0	0	0	0	0	0	0	0	0	0		1	1	1	1	1	0	0	1	0	2	1	0	0	0	2	2	0	0	1	0	1	3	4
NA_009_063	4	7	Longaroi	9	Lore Kaalbert	1	10	1	20.1	32.9	142	0.287534	0.583834	32.9	3.5847	0	0	1	0	1	0	0	0	0	0		1	0	0		1	0	8	10	0	14	2	0	0	1	2	8	1	9	18	0	18	16	12
NA_009_064	4	7	Longaroi	9	Lore Kaamunyinakori	1	12	1	19	28.2	139	-1.94283	-1.30136	28.2	2.80182	0	0	0	0	0	0	0	0	0	0		1	0	0		1	10	0	4	0	1	0	0	0	0	0	2	0	0	14	0	14	1	2
NA_009_065	4	7	Longaroi	9	Lore Kaamunyinakori	1	12	0	18.2	28.8	143	-1.91897	-0.949292	28.8	2.69797	0	0	0	0	0	0	0	0	0	0		1	1	0		1	0	0	1	0	1	2	0	0	3	2	4	0	0	1	0	1	3	9
NA_009_066	4	7	Longaroi	9	Lore Kaalbert	1	8	1	16.9	24	130	-0.467759	0.392544	24	3.01929	0	0	1	0	1	0	0	0	0	1	wounds	1	1	1	1	1	0	3	13	0	11	1	0	1	2	1	6	0	13	16	0	16	13	9
NA_009_068	4	7	Longaroi	9	Lore Angimiroo	1	9	1	17.1	24	132	-1.18762	-0.220727	24	2.73336	0	0	0	0	0	0	0	0	0	0		1	0	0		1	0	0	1	0	2	0	1	0	0	0	3	0	0	1	0	1	3	3
NA_009_069	4	7	Longaroi	9	Lore Akanyangareng	1	9	1	17.1	23.2	127	-1.45487	-1.08294	23.2	2.57385	0	0	0	0	0	0	0	0	0	0		1	1	1	1	1	0	10	11	2	10	3	0	0	3	5	6	3	7	21	10	31	13	17
NA_009_070	4	7	Longaroi	9	Lore Angimiroo	1	11	0	17.2	29	139	-1.22223	-0.742443	29	2.88627	0	0	0	0	0	0	0	0	0	0		1	0	0		1	0	2	2	0	5	0	0	0	1	6	5	4	0	4	0	4	5	16
NA_009_071	4	7	Longaroi	9	Lore Kaamunyinakori	1	10	1	15.8	32.2	127	0.161274	-1.84207	32.2	3.52924	0	0	0	0	0	0	0	0	0	0		1	1	0		1	2	1	19	0	11	0	0	0	0	0	7	0	6	22	0	22	11	7
NA_009_073	4	7	Longaroi	9	Lore Angimiroo	1	9	1	16	20	127	-2.74869	-1.08294	20	1.74444	1	0	0	0	0	0	0	0	0	0		1	1	0		1	0	0	1	0	7	0	0	0	4	0	8	1	0	1	0	1	7	13
NA_009_075	4	7	Longaroi	9	Lore Angimiroo	1	8	1	15.5	21.2	124	-1.43964	-0.702927	21.2	2.35575	0	0	0	0	0	0	0	0	0	0		1	0	0		1	2	1	2	0	11	1	0	0	0	0	4	0	1	5	0	5	12	4
NA_009_077	4	7	Longaroi	9	Lore Kaamunyinakori	1	10	1	18	31.2	147	-0.0294172	1.39247	31.2	3.44377	0	0	0	0	0	0	0	0	0	0		1	0	0		1	0	0	4	0	3	0	0	0	0	1	3	2	5	4	0	4	3	6
NA_009_078	4	7	Longaroi	9	Lore Kaamunyinakori	1	10	1	16.5	26.1	137	-1.24184	-0.2248	26.1	2.85349	0	0	0	0	0	0	0	0	0	0		1	1	0		1	0	4	13	1	8	3	0	0	2	5	6	1	4	17	5	22	11	14
NA_009_079	4	7	Longaroi	9	Lore Alomilimil	1	13	1	19.2	40.3	164	-0.35987	1.17673	40.3	3.70975	0	0	0	0	0	0	0	0	0	0		1	1	0		1	0	4	12	1	13	6	0	0	5	5	8	1	1	16	5	21	19	19
NA_009_080	4	7	Longaroi	9	Lore Kaamunyinakori	1	8	1	17.7	26.5	130	0.226054	0.392544	26.5	3.45168	0	0	0	0	0	0	0	0	0	0		1	1	0		1	1	0	2	0	3	0	1	0	0	0	3	0	1	3	0	3	4	3
NA_009_082	4	7	Longaroi	9	Lore Kaamunyinakori	1	8	1	16.1	22	122	-1.13665	-1.06808	22	2.56977	0	0	0	0	0	0	0	0	0	0		1	1	0		1	0	0	2	0	0	0	0	0	0	0	1	1	0	2	0	2	0	2
NA_009_083	4	7	Longaroi	9	Lore Kaamunyinakori	1	10	1	18.2	28	137	-0.735997	-0.2248	28	3.10946	0	0	0	0	0	0	0	0	0	0		1	1	0		1	0	0	2	0	2	0	0	0	0	4	6	0	2	2	0	2	2	10
NA_009_084	4	7	Longaroi	9	Lore Kaamunyinakori	1	8	1	15.5	20.8	127	-1.5999	-0.155192	20.8	2.23995	0	0	0	0	0	0	0	0	0	0		1	1	1	1	1	0	3	10	1	8	0	0	0	1	0	3	0	5	13	5	18	8	4
NA_009_085	4	7	Longaroi	9	Lore Kaamunyinakori	1	8	1	16.7	25	125	-0.17354	-0.520349	25	3.2069	0	0	0	0	0	0	0	0	0	0		1	1	0		1	10	12	15	2	12	3	3	0	4	3	5	5	3	37	10	47	18	17
NA_009_086	4	7	Longaroi	9	Lore Kaamunyinakori	1	8	1	15.1	21.6	124	-1.28533	-0.702927	21.6	2.46555	0	0	0	0	0	0	0	0	0	0		1	1	0		1	1	2	5	0	9	0	0	0	0	0	4	0	6	8	0	8	9	4
NA_009_087	4	7	Longaroi	9	Lore Kaamunyinakori	1	8	1	15	18.7	117	-2.55403	-1.98098	18.7	1.51365	1	0	0	0	0	0	0	0	0	0		1	1	0		1	0	0	4	0	8	1	2	1	0	3	5	2	3	4	0	4	12	10
NA_009_088	4	7	Longaroi	9	Lore Akanyangareng	1	8	1	16.8	24.4	121	-0.34717	-1.25066	24.4	3.09694	0	0	0	0	0	0	0	0	0	0		1	0	0		1	1	3	8	0	11	2	0	0	0	1	9	1	2	12	0	12	13	11
NA_010_002	4	5	Loolim	10	Not applicable	0	14	1	20.7	39.4	157	-1.24813	-0.646048	39.4	3.61687	0	0	0	0	0	0	0	0	0	0		1	1	0		1	0	0	2	0	16	1	0	0	0	0	8	0	0	2	0	2	17	8
NA_010_004	4	5	Loolim	10	Not applicable	0	11	0	17.5	29.6	149	-1.10003	0.707643	29.6	2.96716	0	0	0	0	0	0	0	0	0	0		1	1	1	3	1	1	4	33	0	15	1	2	1	2	4	7	1	6	38	0	38	19	14
NA_010_007	4	5	Loolim	10	Not applicable	0	12	0	18.3	29.6	143	-1.75237	-0.949292	29.6	2.81209	0	0	0	0	0	0	0	0	0	0		1	0	0		1	0	1	4	0	15	0	0	0	0	0	0	0	2	5	0	5	15	0
NA_010_008	4	5	Loolim	10	Not applicable	0	11	1	20.2	37.9	146	0.512287	0.395519	37.9	3.74259	0	0	0	0	0	0	0	0	0	0		1	0	0		1	0	0	1	0	5	0	0	0	0	0	0	0	0	1	0	1	5	0
NA_010_009	4	5	Loolim	10	Not applicable	0	12	0	20.2	29.5	134	-1.77284	-2.21314	29.5	2.79821	0	1	0	0	0	0	0	0	0	0		1	1	0		1	1	0	3	0	2	0	0	0	0	1	3	0	2	4	0	4	2	4
NA_010_010	4	5	Loolim	10	Lore Apalomwae	1	12	1	17	24.6	130	-3.00125	-2.55266	24.6	2.23453	2	1	0	0	0	0	0	0	0	0		1	0	1	1	1	0	0	1	0	3	0	0	0	0	0	1	0	1	1	0	1	3	1
NA_010_011	4	5	Loolim	10	Not applicable	0	13	1	19.5	33.8	143	-1.42055	-1.50056	33.8	3.27606	0	0	0	0	0	0	0	0	0	0		1	1	0		1	0	0	1	0	0	0	0	0	0	0	8	0	3	1	0	1	0	8
NA_010_012	4	5	Loolim	10	Lore Alokoi	1	11	0	16	26.9	149	-1.6838	0.707643	26.9	2.56986	0	0	0	0	0	0	0	0	0	0		1	1	1	1	1	6	8	9	0	11	1	0	0	3	6	5	3	3	23	0	23	12	17
NA_010_014	4	5	Loolim	10	Not applicable	0	11	1	14.3	19.3	117	-4.66908	-3.96571	19.3	1.05082	2	2	0	0	0	0	0	0	0	0		1	0	0		1	2	0	4	0	15	6	0	0	0	0	7	0	4	6	0	6	21	7
NA_010_018	4	5	Loolim	10	Lore Apalomwae	1	12	1	16.5	29.1	147	-1.7163	-0.189086	29.1	2.91375	0	0	1	0	1	0	0	0	0	0		1	0	0		1	0	1	6	0	2	1	0	0	1	2	6	0	3	7	0	7	3	9
NA_010_020	4	5	Loolim	10	Lore Apalomwae	1	11	0	16	23	130	-2.71478	-2.04752	23	1.80033	1	1	0	0	0	0	0	0	0	0		1	0	0		1	0	0	2	0	0	0	0	0	0	0	4	1	0	2	0	2	0	5
NA_010_021	4	5	Loolim	10	Not applicable	0	9	1	18	29.1	139	0.156979	0.986375	29.1	3.472	0	0	0	0	0	0	0	0	0	0		1	0	0		1	0	0	1	0	1	0	0	0	0	1	3	0	5	1	0	1	1	4
NA_010_022	4	5	Loolim	10	Not applicable	0	12	1	18.8	35.3	147	-0.449267	-0.189086	35.3	3.47875	0	0	0	0	0	0	0	0	0	0		1	1	0		1	0	0	4	0	3	0	0	1	0	0	1	0	12	4	0	4	4	1
NA_010_025	4	5	Loolim	10	Not applicable	0	12	1	18.8	33.2	151	-0.829257	0.367049	33.2	3.32011	0	0	0	0	0	0	0	0	0	0		1	0	0		1	0	0	2	0	1	0	0	0	0	9	10	0	0	2	0	2	1	19
NA_010_026	4	5	Loolim	10	Lore Alokoi	1	9	0	17	24.9	131	-0.913325	-0.311498	24.9	2.62977	0	0	0	0	0	0	0	0	0	0		1	0	0		1	0	0	1	0	1	0	0	0	0	0	3	0	0	1	0	1	1	3
NA_010_028	4	5	Loolim	10	Not applicable	0	10	0	16.7	24.4	131	-1.71803	-1.16859	24.4	2.31278	0	0	0	0	0	0	0	0	0	0		1	0	0		1	0	0	1	0	9	2	1	0	2	0	0	0	1	1	0	1	12	2
NA_010_030	4	5	Loolim	10	Not applicable	0	10	1	16.5	26.3	131	-1.18498	-1.19516	26.3	2.88294	0	0	0	0	0	0	0	0	0	0		1	1	1		1	2	0	12	0	5	0	0	0	1	1	3	1	18	14	0	14	5	6
NA_010_034	4	5	Loolim	10	Lore Alokoi	1	14	1	19.5	42.8	159	-0.769687	-0.404985	42.8	3.80274	0	0	0	0	0	0	0	0	0	0		2	1	0		1	0	6	13	0	7	1	0	0	2	0	9	0	0	19	0	19	8	11
NA_010_038	4	5	Loolim	10	Not applicable	0	11	1	16.1	24.6	136	-2.38694	-1.10835	24.6	2.4133	1	0	0	0	0	0	0	0	0	0		1	1	0		1	0	0	3	0	2	3	0	0	2	2	2	0	0	3	0	3	5	6
NA_010_040	4	5	Loolim	10	Not applicable	0	12	1	19.8	39.4	160	0.183786	1.61835	39.4	3.72268	0	0	0	0	0	0	0	0	0	0		1	1	0		1	0	0	2	0	3	0	0	0	0	0	3	0	1	2	0	2	3	3
NA_010_042	4	5	Loolim	10	Lore Alokoi	1	12	1	19.5	34.1	150	-0.661098	0.228015	34.1	3.39145	0	0	1	0	1	0	0	0	0	0		1	0	0		1	0	0	9	0	13	1	0	0	2	0	9	0	4	9	0	9	14	11
NA_010_044	4	5	Loolim	10	Not applicable	0	10	1	15	23.1	130	-2.21911	-1.35689	23.1	2.32097	1	0	1	0	1	0	0	0	0	0		1	0	0		1	1	0	8	0	9	0	0	0	0	0	7	1	4	9	0	9	9	8
NA_010_053	4	5	Loolim	10	Not applicable	0	12	1	16.5	30	146	-1.50238	-0.32812	30	3.01639	0	0	0	0	0	0	0	0	0	0		1	0	0		1	0	0	1	1	3	0	0	0	0	0	3	0	5	1	5	6	3	3
NA_010_054	4	5	Loolim	10	Lore Alokoi	1	10	1	16.5	20.5	143	-3.31015	0.745561	20.5	1.66935	2	0	0	0	0	0	0	0	0	0		1	1	0		1	0	0	4	0	7	0	0	0	0	1	9	1	2	4	0	4	7	11
NA_010_056	4	5	Loolim	10	Not applicable	0	12	0	16.3	26.7	138	-2.38938	-1.65143	26.7	2.36062	1	0	0	0	0	0	0	0	0	0		1	1	0		1	1	1	20	0	9	3	1	0	5	2	3	1	1	22	0	22	13	11
NA_010_057	4	5	Loolim	10	Not applicable	0	9	0	18.3	27.2	131	-0.356397	-0.311498	27.2	3.02037	0	0	0	0	0	0	0	0	0	0		1	0	0		1	0	0	3	1	1	3	0	0	4	10	10	0	1	3	5	8	4	24
NA_010_061	4	5	Loolim	10	Not applicable	0	13	0	18.4	31.7	148	-2.15148	-1.05072	31.7	2.95464	1	0	0	0	0	0	0	0	0	0		1	1	0		1	0	0	4	0	8	1	0	1	0	1	9	1	1	4	0	4	10	11
NA_010_066	4	5	Loolim	10	Lore Alokoi	1	12	0	15.5	27.2	145	-2.27272	-0.668436	27.2	2.44639	1	0	0	0	0	0	0	0	0	0		1	1	0		1	1	1	2	0	1	0	0	0	0	0	0	1	0	4	0	4	1	1
NA_010_067	4	5	Loolim	10	Not applicable	0	12	1	17.7	32.1	145	-1.04661	-0.467154	32.1	3.22522	0	0	0	0	0	0	0	0	0	0		1	0	0		1	0	0	9	0	8	1	1	0	0	1	4	3	3	9	0	9	10	8
NA_010_068	4	5	Loolim	10	Lore Apalomwae	1	14	0	21.2	47.6	162	-0.313754	0.365219	47.6	4.17105	0	0	0	0	0	0	0	0	0	0		1	0	0		1	1	3	9	0	8	2	0	0	2	1	5	0	5	13	0	13	10	8
NA_010_071	4	5	Loolim	10	Not applicable	0	12	0	18.3	33.4	151	-1.04029	0.174131	33.4	3.26934	0	0	1	0	0	0	0	0	0	1	Wounds	1	1	0		1	3	29	39	1	16	0	0	0	0	9	8	0	1	71	5	76	16	17
NA_010_072	4	5	Loolim	10	Not applicable	0	13	1	18.3	34.6	155	-1.27296	0.0293222	34.6	3.34171	0	0	1	0	0	0	0	0	0	1	wounds	1	1	0		1	20	1	31	0	12	2	1	0	2	3	9	1	12	52	0	52	15	15
NA_010_075	4	5	Loolim	10	Lore Alokoi	1	14	1	17.5	29.9	144	-2.94716	-2.21296	29.9	2.76989	1	1	0	0	0	0	0	0	0	0		1	1	0		1	0	0	3	0	4	0	0	0	0	0	4	0	0	3	0	3	4	4
NA_010_081	4	5	Loolim	10	Lore Apalomwae	1	12	0	19.6	30.9	147	-1.49484	-0.38758	30.9	2.98311	0	0	0	0	0	0	0	0	0	0		1	1	0		1	2	7	16	0	16	4	0	1	4	2	6	0	4	25	0	25	21	12
NA_010_082	4	5	Loolim	10	Lore Alokoi	1	11	0	16.5	22.7	127	-2.80566	-2.48255	22.7	1.7283	1	1	0	0	0	0	0	0	0	0		1	0	0		1	0	0	3	0	2	0	0	0	0	0	4	0	0	3	0	3	2	4
NA_010_084	4	5	Loolim	10	Not applicable	0	10	0	14.7	18.8	123	-3.6592	-2.42683	18.8	0.79218	2	1	0	0	0	0	0	0	0	0		1	1	0		1	0	0	7	1	8	0	0	0	1	0	9	0	0	7	5	12	8	10
NA_010_085	4	5	Loolim	10	Lore Apalomwae	1	10	0	17.5	27.1	136	-1.03451	-0.382189	27.1	2.78991	0	0	0	0	0	0	0	0	0	0		1	1	0		1	0	0	1	0	10	0	0	0	0	0	4	2	0	1	0	1	10	6
NA_010_088	4	5	Loolim	10	Not applicable	0	9	0	16.7	20.3	117	-2.35879	-2.70763	20.3	1.52709	1	1	0	0	0	0	0	0	0	0		1	1	0		1	0	0	2	0	7	2	0	0	0	0	1	0	2	2	0	2	9	1
NA_010_090	4	5	Loolim	10	Lore Alokoi	1	11	0	18.7	27.5	134	-1.54619	-1.46749	27.5	2.666	0	0	0	0	0	0	0	0	0	0		1	1	0		1	0	0	3	0	8	2	0	0	1	1	5	2	6	3	0	3	10	9
NA_010_091	4	5	Loolim	10	Lore Alokoi	1	8	0	14.4	19.6	124	-1.91134	-0.61026	19.6	1.53777	0	0	0	0	0	0	0	0	0	0		1	1	0		1	0	3	3	0	9	1	0	0	0	0	6	0	1	6	0	6	10	6
NA_010_093	4	5	Loolim	10	Lore Alokoi	1	10	0	16.3	20.5	139	-2.97359	0.0896507	20.5	1.35694	1	0	0	0	0	0	0	0	0	0		1	1	0		1	0	0	1	0	1	0	0	0	0	0	1	0	0	1	0	1	1	1
NA_010_094	4	5	Loolim	10	Lore Alokoi	1	11	0	17.4	27.6	134	-1.52372	-1.46749	27.6	2.68155	0	0	0	0	0	0	0	0	0	0		1	1	0		1	0	0	4	0	0	3	0	1	0	0	3	0	0	4	0	4	4	3
NA_010_095	4	5	Loolim	10	Not applicable	0	12	0	18.3	28.9	139	-1.89779	-1.511	28.9	2.71263	0	0	0	0	0	0	0	0	0	0		1	1	0		1	3	2	6	2	10	1	1	0	3	0	2	0	1	11	10	21	12	5
NA_010_096	4	5	Loolim	10	Not applicable	0	11	1	19	34.1	142	-0.0833802	-0.20603	34.1	3.50769	0	0	0	0	0	0	0	0	0	0		1	0	0		1	1	2	22	1	12	3	0	0	2	0	10	0	13	25	5	30	15	12
NA_010_099	4	5	Loolim	10	Lore Alokoi	1	12	1	17.2	31.1	146	-1.25654	-0.32812	31.1	3.1307	0	0	0	0	0	0	0	0	0	0		1	0	0		1	0	0	3	0	4	0	0	0	1	0	2	1	0	3	0	3	4	4
NA_010_102	4	5	Loolim	10	Lore Apalomwae	1	11	1	15.5	22	122	-3.36786	-3.21377	22	1.86074	2	2	0	0	0	0	0	0	0	0		1	0	0		1	0	0	5	0	5	1	0	0	0	0	3	0	0	5	0	5	6	3
NA_010_103	4	5	Loolim	10	Lore Apalomwae	1	11	0	15.7	22	124	-3.02536	-2.91757	22	1.55131	2	1	0	0	0	0	0	0	0	0		1	1	0		1	0	3	13	0	8	0	0	1	0	8	9	0	0	16	0	16	9	17
NA_010_104	4	5	Loolim	10	Not applicable	0	12	1	17.3	30	145	-1.50238	-0.467154	30	3.01639	0	0	0	0	0	0	0	0	0	0		1	1	0		1	0	0	9	0	6	0	3	1	0	0	2	2	3	9	0	9	10	4
NA_010_105	4	5	Loolim	10	Not applicable	0	11	1	17.6	26.8	133	-1.70681	-1.55951	26.8	2.7665	0	0	1	0	0	0	0	0	0	1	Cracking of feet and wounds on the skin with no known cause	1	0	0		1	1	2	5	0	11	3	0	1	2	0	9	0	6	8	0	8	15	11
NA_010_106	4	5	Loolim	10	Lore Alokoi	1	12	1	14.4	21	126	-4.39178	-3.1088	21	1.37702	2	2	0	0	0	0	0	0	0	0		1	1	0		1	1	2	5	0	6	0	0	0	1	0	1	1	0	8	0	8	6	3
NA_010_107	4	5	Loolim	10	Lore Apalomwae	1	8	1	15.3	22.5	125	-0.958252	-0.520349	22.5	2.69277	0	0	0	0	0	0	0	0	0	0		1	0	0		1	0	0	1	0	1	0	0	0	1	0	0	0	0	1	0	1	1	1
NA_010_108	4	5	Loolim	10	Not applicable	0	12	1	19	35.4	162	-0.432215	1.89642	35.4	3.48566	0	0	0	0	0	0	0	0	0	0		1	1	0		1	0	0	1	0	0	0	0	0	0	1	6	0	0	1	0	1	0	7
NA_010_109	4	5	Loolim	10	Not applicable	0	8	1	15.1	19.1	123	-2.35607	-0.885506	19.1	1.66949	1	0	0	0	0	0	0	0	0	0		1	1	0		1	2	3	14	0	15	5	7	0	0	1	7	0	8	19	0	19	27	8
NA_010_112	4	5	Loolim	10	Lore Alokoi	1	10	1	15.5	23.7	132	-2.00288	-1.03343	23.7	2.44303	1	0	0	0	0	0	0	0	0	0		1	1	0		1	0	0	1	0	2	0	1	0	0	0	8	0	0	1	0	1	3	8
NA_010_113	4	5	Loolim	10	Lore Alokoi	1	8	1	13.8	18.3	119	-2.76066	-1.61582	18.3	1.34813	1	0	1	0	1	0	0	0	0	0		1	0	0		1	2	2	9	0	6	0	1	0	1	0	8	0	1	13	0	13	7	9
NA_010_114	4	5	Loolim	10	Not applicable	0	10	1	17.8	32.7	148	0.252038	1.5542	32.7	3.5692	0	0	0	0	0	0	0	0	0	0		1	1	0		1	0	1	2	2	7	2	1	0	0	1	3	0	2	3	10	13	10	4
NA_010_115	4	5	Loolim	10	Not applicable	0	11	1	16.2	22.4	119	-3.20199	-3.66494	22.4	1.95772	2	2	0	0	0	0	0	0	0	0		1	1	1	1	1	0	1	3	0	2	3	0	0	2	1	2	0	0	4	0	4	5	5
NA_010_116	4	5	Loolim	10	Lore Apalomwae	1	8	1	15.3	24.2	130	-0.406965	0.392544	24.2	3.05857	0	0	0	0	0	0	0	0	0	0		1	1	0		1	0	0	13	0	8	0	0	0	0	4	2	5	0	13	0	13	8	11
NA_011_001	4	4	Adwaramukuny	11	Lore Angikatap	1	10	1	17	27.3	137	-0.913773	-0.2248	27.3	3.02106	0	0	0	0	0	0	0	0	0	0		1	1	0		1	0	0	2	0	7	0	0	0	1	0	3	1	0	2	0	2	7	5
NA_011_002	4	4	Adwaramukuny	11	Lore Angikatap	1	8	0	16	21.4	131	-1.26199	0.668729	21.4	2.08264	0	0	0	0	0	0	0	0	0	0		1	1	0		1	0	0	6	0	13	0	0	0	0	0	3	0	0	6	0	6	13	3
NA_011_004	4	4	Adwaramukuny	11	Lore Angikatap	1	12	1	21	42.2	153	0.550266	0.645117	42.2	3.85234	0	0	0	0	0	0	0	0	0	0		1	0	0		1	0	0	21	0	16	4	1	0	1	0	8	1	0	21	0	21	21	10
NA_011_006	4	4	Adwaramukuny	11	Lore Angikatap	1	9	1	16.1	23.7	129	-1.28562	-0.738056	23.7	2.67534	0	0	0	0	0	0	0	0	0	0		1	1	0		1	0	0	10	0	5	0	0	0	1	1	3	2	1	10	0	10	5	7
NA_011_007	4	4	Adwaramukuny	11	Lore Angikatap	1	8	0	16.1	21.9	132	-1.09864	0.851442	21.9	2.2155	0	0	0	0	0	0	0	0	0	0		1	0	0		1	0	0	3	0	4	7	0	0	6	1	5	0	0	3	0	3	11	12
NA_011_008	4	4	Adwaramukuny	11	Lore Alokikiya	1	10	1	17.7	29.4	137	-0.407021	-0.2248	29.4	3.26853	0	0	0	0	0	0	0	0	0	0		1	0	0		1	0	0	3	0	10	1	0	0	1	0	2	0	0	3	0	3	11	3
NA_011_010	4	4	Adwaramukuny	11	Lore Alokooruk	1	8	1	14.4	20.7	122	-1.64093	-1.06808	20.7	2.21001	0	0	0	0	0	0	0	0	0	0		1	0	0		1	2	2	19	0	12	0	0	0	1	0	6	0	0	23	0	23	12	7
NA_011_012	4	4	Adwaramukuny	11	Lore Angikatap	1	8	1	14.5	21.2	130	-1.43964	0.392544	21.2	2.35575	0	0	0	0	0	0	0	0	0	0		1	1	1	14	1	21	25	2	3	15	2	0	0	4	10	6	4	0	48	15	63	17	24
NA_011_014	4	4	Adwaramukuny	11	Lore Alokikiya	1	12	0	21	37	159	-0.464315	1.29756	37	3.60436	0	0	0	0	0	0	0	0	0	0		1	1	0		1	0	0	7	0	10	1	1	0	0	0	8	0	1	7	0	7	12	8
NA_011_016	4	4	Adwaramukuny	11	Lore Alonges	1	9	0	17.4	25.7	132	-0.709529	-0.140346	25.7	2.77495	0	0	0	0	0	0	0	0	0	0		1	0	0		1	0	0	5	0	6	0	0	0	0	0	4	0	0	5	0	5	6	4
NA_011_017	4	4	Adwaramukuny	11	Lore Alonges	1	10	1	16.5	23.2	129	-2.18226	-1.51862	23.2	2.34194	1	0	0	0	0	0	0	0	0	0		1	1	0		1	4	6	10	1	13	2	1	0	1	6	6	0	1	20	5	25	16	13
NA_011_018	4	4	Adwaramukuny	11	Lore Alonges	1	9	0	13.6	16.2	119	-4.24932	-2.36532	16.2	-0.101368	2	1	0	0	0	0	0	0	0	0		1	1	1	52	1	19	42	0	16	18	12	0	0	10	9	7	3	11	61	80	141	30	29
NA_011_019	4	4	Adwaramukuny	11	Lore Alonges	1	11	1	14.3	24.1	132	-2.559	-1.7099	24.1	2.32004	1	0	1	0	1	0	0	0	0	0		1	1	1	7	1	28	25	26	4	18	1	0	0	5	5	10	0	7	79	20	99	19	20
NA_011_020	4	4	Adwaramukuny	11	Lore Alonges	1	14	0	20.5	45.1	160	-0.655772	0.0595964	45.1	4.03138	0	0	0	0	0	0	0	0	0	0		1	0	0		1	0	0	5	0	9	1	0	0	2	0	5	0	0	5	0	5	10	7
NA_011_021	4	4	Adwaramukuny	11	Lore Alonges	1	14	0	20.5	46.1	161	-0.51611	0.212408	46.1	4.08931	0	0	1	0	0	0	0	0	1	0		1	0	0		1	0	0	15	0	16	1	0	0	1	0	7	0	5	15	0	15	17	8
NA_011_022	4	4	Adwaramukuny	11	Lore Alonges	1	8	0	15.3	17.8	119	-2.67699	-1.52382	17.8	0.86159	1	0	0	0	0	0	0	0	0	0		1	0	0		1	0	2	3	0	9	0	0	0	0	0	3	7	3	5	0	5	9	10
NA_011_023	4	4	Adwaramukuny	11	Lore Alonges	1	9	1	15.6	20.1	117	-2.70172	-2.80737	20.1	1.77618	1	1	0	0	0	0	0	0	0	0		1	0	0		1	0	0	5	0	11	0	0	0	0	1	4	1	0	5	0	5	11	6
NA_011_024	4	4	Adwaramukuny	11	Lore Alonges	1	8	0	15.4	21	124	-1.39767	-0.61026	21	1.97099	0	0	0	0	0	0	0	0	0	0		1	1	0		1	0	0	11	0	4	0	0	0	0	1	0	0	1	11	0	11	4	1
NA_011_025	4	4	Adwaramukuny	11	Lore Alokooruk	1	9	0	16	23.6	131	-1.27066	-0.311498	23.6	2.36899	0	0	0	0	0	0	0	0	0	0		1	1	0		1	1	0	12	0	7	2	0	0	1	4	4	2	1	13	0	13	9	11
NA_011_026	4	4	Adwaramukuny	11	Lore Alokooruk	1	10	0	16.8	25.7	137	-1.37346	-0.224909	25.7	2.55714	0	0	0	0	0	0	0	0	0	0		1	1	0		1	0	0	9	0	7	1	0	0	0	1	6	1	1	9	0	9	8	8
NA_011_027	4	4	Adwaramukuny	11	Lore Alonges	1	10	0	17	25.1	137	-1.52867	-0.224909	25.1	2.44804	0	0	0	0	0	0	0	0	0	0		1	1	0		1	0	0	8	0	14	0	0	0	0	0	1	0	0	8	0	8	14	1
NA_011_028	4	4	Adwaramukuny	11	Lore Alonges	1	8	0	17.4	22.8	125	-0.820812	-0.427547	22.8	2.43755	0	0	0	0	0	0	0	0	0	0		1	1	0		1	0	1	7	0	9	0	0	0	0	0	3	0	4	8	0	8	9	3
NA_011_029	4	4	Adwaramukuny	11	Lore Alonges	1	10	0	15.6	20.1	123	-3.12589	-2.42683	20.1	1.23408	2	1	0	0	0	0	0	0	0	0		1	1	0		1	0	0	7	0	3	2	0	0	1	3	5	0	0	7	0	7	5	9
NA_011_030	4	4	Adwaramukuny	11	Lore Angikatap	1	10	0	16.7	25.1	137	-1.52867	-0.224909	25.1	2.44804	0	0	0	0	0	0	0	0	0	0		1	1	0		1	0	0	3	0	7	3	0	0	0	0	2	0	0	3	0	3	10	2
NA_011_033	4	4	Adwaramukuny	11	Lore Alokikiya	1	9	0	17.9	26.9	137	-0.424208	0.715415	26.9	2.97385	0	0	1	0	1	0	0	0	0	0		1	0	0		1	0	2	8	0	7	0	0	0	0	0	4	1	5	10	0	10	7	5
NA_011_034	4	4	Adwaramukuny	11	Lore Alokikiya	1	10	0	16.2	20.1	123	-3.12589	-2.42683	20.1	1.23408	2	1	0	0	0	0	0	0	0	0		1	0	0		1	0	0	12	0	9	0	0	0	1	0	5	1	1	12	0	12	9	7
NA_011_036	4	4	Adwaramukuny	11	Lore Angikatap	1	8	1	15.1	19.6	120	-2.12002	-1.43324	19.6	1.85181	1	0	0	0	0	0	0	0	0	0		1	1	0		1	0	0	6	0	8	1	1	0	0	1	3	0	1	6	0	6	10	4
NA_011_037	4	4	Adwaramukuny	11	Lore Alonges	1	8	0	15.6	16.7	115	-3.21697	-2.25467	16.7	0.363154	2	1	1	0	1	0	0	0	0	0		1	1	0		1	5	2	6	3	12	5	1	0	4	0	4	0	8	13	15	28	18	8
NA_011_038	4	4	Adwaramukuny	11	Lore Alokikiya	1	8	1	14.2	16.3	113	-3.94635	-2.71129	16.3	0.342547	2	1	0	0	0	0	0	0	0	0		1	0	0		1	0	0	3	0	1	0	0	0	0	0	0	0	0	3	0	3	1	0
NA_012_001	4	2	Naitakwae	12	Lore Apalotuko	1	12	1	16.9	26.3	137	-2.468	-1.57942	26.3	2.5295	1	0	1	0	0	0	0	0	1	0		1	1	0		1	0	0	4	0	3	0	0	0	0	0	2	0	1	4	0	4	3	2
NA_012_002	4	2	Naitakwae	12	Lore Apalotuko	1	11	0	16.1	30	149	-1.02074	0.707643	30	3.019	0	0	0	0	0	0	0	0	0	0		1	1	0		1	0	0	6	2	15	5	1	0	0	0	7	0	5	6	10	16	21	7
NA_012_003	4	2	Naitakwae	12	Lore Apalotuko	1	10	1	17	21.8	126	-2.73052	-2.0038	21.8	2.02289	1	1	0	0	0	0	0	0	0	0		1	1	0		1	0	4	20	0	8	0	2	0	0	6	4	0	7	24	0	24	10	10
NA_012_004	4	2	Naitakwae	12	Lore Apalotom	1	10	0	19.6	30	144	-0.42018	0.87605	30	3.19238	0	0	1	0	0	0	0	0	1	0		1	1	0		1	2	3	16	1	11	2	1	0	5	1	10	0	5	21	5	26	14	16
NA_012_005	4	2	Naitakwae	12	Lore Apalotom	1	8	1	16.9	21.3	120	-1.40052	-1.43324	21.3	2.38374	0	0	0	0	0	0	0	0	0	0		1	1	0		1	3	1	23	0	14	1	0	0	0	8	8	0	5	27	0	27	15	16
NA_012_006	4	2	Naitakwae	12	Lore Apalotom	1	12	0	18.2	33.6	153	-1.00601	0.454987	33.6	3.29013	0	0	0	0	0	0	0	0	0	0		1	1	0		1	0	0	8	1	6	0	0	0	0	0	7	0	4	8	5	13	6	7
NA_012_007	4	2	Naitakwae	12	Lore Apalotuko	1	8	1	14.4	18.9	123	-2.454	-0.885506	18.9	1.59273	1	0	0	0	0	0	0	0	0	0		1	1	0		1	0	0	2	0	3	0	0	0	0	3	6	0	0	2	0	2	3	9
NA_012_008	4	2	Naitakwae	12	Lore Apalotom	1	8	0	14.5	16	113	-3.595	-2.6201	16	0.00378038	2	1	1	0	1	0	0	0	0	0		1	1	1	22	1	4	18	0	21	14	7	0	0	11	7	4	5	13	22	105	127	21	27
NA_012_009	4	2	Naitakwae	12	Lore Apalotom	1	8	1	14.5	20.5	116	-1.7242	-2.16356	20.5	2.14889	0	1	0	0	0	0	0	0	0	0		1	1	0		1	1	0	8	0	8	0	0	0	0	5	10	0	8	9	0	9	8	15
NA_012_010	4	2	Naitakwae	12	Lore Apalotom	1	10	0	15.5	24.1	135	-1.80208	-0.539469	24.1	2.25199	0	0	0	0	0	0	0	0	0	0		1	1	1	1	1	0	0	5	0	7	0	0	0	0	0	4	0	0	5	0	5	7	4
NA_012_011	4	2	Naitakwae	12	Lore Apalotom	1	9	1	14	19	120	-3.24686	-2.29004	19	1.40046	2	1	1	0	1	0	0	0	0	0		1	1	1	3	1	9	4	16	2	13	0	4	0	3	0	4	1	13	29	10	39	17	8
NA_012_012	4	2	Naitakwae	12	Lore Apalotom	1	9	0	16.4	22.4	129	-1.63318	-0.653803	22.4	2.09644	0	0	1	0	1	0	0	0	0	0		1	1	0		1	0	0	6	0	7	7	0	0	8	0	2	0	0	6	0	6	14	10
NA_012_013	4	2	Naitakwae	12	Lore Apalotuko	1	12	1	17	31.2	144	-1.23498	-0.606188	31.2	3.14053	0	0	0	0	0	0	0	0	0	0		1	1	0		1	8	7	26	0	11	1	0	0	1	5	6	1	7	41	0	41	12	13
NA_012_014	4	2	Naitakwae	12	Lore Apalotuko	1	10	0	20.4	32.1	145	-0.0357243	1.03333	32.1	3.43141	0	0	0	0	0	0	0	0	0	0		1	1	0		1	0	0	5	0	5	0	0	0	0	0	3	0	0	5	0	5	5	3
NA_012_018	4	2	Naitakwae	12	Lore Apalotuko	1	13	1	17.3	33.4	146	-1.49646	-1.11809	33.4	3.2416	0	0	0	0	0	0	0	0	0	0		1	1	0		1	0	3	9	0	9	2	1	0	1	2	2	0	2	12	0	12	12	5
NA_012_020	4	2	Naitakwae	12	Lore Apalotom	1	11	1	15.5	28.4	137	-1.2789	-0.957966	28.4	2.97594	0	0	0	0	0	0	0	0	0	0		1	1	0		1	1	0	4	0	2	0	0	0	0	0	5	3	0	5	0	5	2	8
NA_012_021	4	2	Naitakwae	12	Lore Apalotuko	1	10	0	17	27.2	138	-1.01145	-0.0676292	27.2	2.80547	0	0	0	0	0	0	0	0	0	0		1	1	0		1	1	2	29	0	13	2	0	0	2	0	5	0	3	32	0	32	15	7
NA_012_022	4	2	Naitakwae	12	Lore Apalotom	1	12	1	16.5	28.4	145	-1.89134	-0.467154	28.4	2.82755	0	0	0	0	0	0	0	0	0	0		1	1	1	3	1	1	0	8	0	11	3	2	0	1	2	3	0	2	9	0	9	16	6
NA_012_023	4	2	Naitakwae	12	Lore Apalotom	1	10	0	17	27.2	148	-1.01145	1.50517	27.2	2.80547	0	0	0	0	0	0	0	0	0	0		1	1	0		1	1	5	5	0	5	0	0	0	0	3	5	0	0	11	0	11	5	8
NA_012_025	4	2	Naitakwae	12	Lore Apalotom	1	10	0	17.3	26.5	144	-1.17599	0.87605	26.5	2.69367	0	0	1	0	0	0	0	0	0	1	Dandruff	1	1	1	1	1	2	7	11	6	16	0	7	3	3	7	7	0	14	20	30	50	26	17
NA_012_027	4	2	Naitakwae	12	Lore Apalotuko	1	8	0	16.2	21.5	120	-1.22878	-1.34111	21.5	2.10979	0	0	0	0	0	0	0	0	0	0		1	1	1	1	1	0	0	5	0	7	0	0	0	1	0	5	0	0	5	0	5	7	6
NA_012_028	4	2	Naitakwae	12	Lore Apalotuko	1	10	0	17	25	133	-1.55516	-0.854029	25	2.42925	0	0	1	0	0	0	0	0	1	0		1	1	0		1	3	0	7	0	3	0	0	1	0	2	7	0	5	10	0	10	4	9
NA_012_029	4	2	Naitakwae	12	Lore Apalotuko	1	11	1	16.4	31.4	144	-0.595092	0.0947447	31.4	3.28982	0	0	1	0	0	0	0	0	0	1	Wounds	1	1	0		1	0	1	4	0	7	1	0	0	0	0	4	1	1	5	0	5	8	5
NA_012_031	4	2	Naitakwae	12	Lore Apalotuko	1	12	1	19.2	36.3	155	-0.28267	0.923185	36.3	3.54541	0	0	0	0	0	0	0	0	0	0		1	0	0		1	1	0	9	0	7	0	0	0	0	0	3	4	0	10	0	10	7	7
NA_012_032	4	2	Naitakwae	12	Lore Apalotom	1	11	0	18.8	32.1	154	-0.630614	1.43269	32.1	3.26676	0	0	1	1	0	0	0	0	0	0		1	1	0		1	7	0	33	0	13	9	1	0	6	0	3	0	2	40	0	40	23	9
NA_012_033	4	2	Naitakwae	12	Lore Apalotuko	1	12	1	17.6	27.3	139	-2.18316	-1.30136	27.3	2.67944	1	0	0	0	0	0	0	0	0	0		1	1	1	5	1	24	44	12	4	11	0	1	0	4	10	9	1	8	80	20	100	12	24
NA_012_034	4	2	Naitakwae	12	Lore Apalotom	1	10	0	16.5	23.5	133	-1.97572	-0.854029	23.5	2.12494	0	0	0	0	0	0	0	0	0	0		1	0	0		1	2	0	4	0	10	1	0	0	1	0	1	0	0	6	0	6	11	2
NA_012_035	4	2	Naitakwae	12	Lore Apalotom	1	8	1	16.5	23.5	130	-0.624282	0.392544	23.5	2.91696	0	0	0	0	0	0	0	0	0	0		1	1	1	2	1	0	1	13	2	10	0	0	1	4	4	9	1	2	14	10	24	11	18
NA_012_036	4	2	Naitakwae	12	Lore Apalotuko	1	8	1	16.5	22.6	134	-0.923522	1.12286	22.6	2.71645	0	0	1	0	0	0	0	0	0	1	head lice	1	1	1	1	1	8	8	16	3	14	6	2	1	3	5	7	0	7	32	15	47	23	15
NA_012_037	4	2	Naitakwae	12	Lore Apalotom	1	10	0	15.2	19.9	121	-3.20402	-2.74139	19.9	1.17048	2	1	0	0	0	0	0	0	0	0		1	1	1	90	1	63	32	0	21	18	4	0	0	2	8	10	0	2	95	105	200	22	20
NA_012_038	4	2	Naitakwae	12	Lore Apalotom	1	8	0	16	19.9	121	-1.79584	-1.1584	19.9	1.63663	0	0	1	0	0	0	0	0	0	1	Head lice	1	1	0		1	0	4	8	0	16	2	0	0	0	2	9	0	0	12	0	12	18	11
NA_012_039	4	2	Naitakwae	12	Lore Apalotuko	1	8	1	15.1	21.7	130	-1.24765	0.392544	21.7	2.49211	0	0	0	0	0	0	0	0	0	0		1	1	0		1	6	4	10	0	14	2	1	1	1	10	5	3	8	20	0	20	18	19
NA_012_040	4	2	Naitakwae	12	Lore Apalotuko	1	13	1	17.1	32.1	147	-1.75354	-0.990599	32.1	3.12135	0	0	0	0	0	0	0	0	0	0		1	1	0		1	0	0	3	0	1	0	0	0	0	4	5	0	0	3	0	3	1	9
NA_012_042	4	2	Naitakwae	12	Lore Apalotom	1	10	1	17.1	28.1	141	-0.711358	0.422107	28.1	3.12158	0	0	0	0	0	0	0	0	0	0		1	1	0		1	0	5	4	0	8	1	0	0	4	0	9	1	0	9	0	9	9	14
NA_013_044	4	4	Nakaramwae	13	Lore Amerinyang	1	8	0	15.6	21.8	127	-1.13077	-0.0621217	21.8	2.1895	0	0	0	0	0	0	0	0	0	0		1	1	0		1	1	0	4	0	9	2	0	0	0	3	9	0	0	5	0	5	11	12
NA_013_045	4	4	Nakaramwae	13	Lore Angoriaale	1	10	1	17.5	37.6	160	1.0082	3.49492	37.6	3.88363	0	0	0	0	0	0	0	0	0	0		1	1	0		1	0	1	1	0	6	0	0	0	0	4	6	0	0	2	0	2	6	10
NA_013_046	4	4	Nakaramwae	13	Lore Angoriaale	1	13	1	19.3	33.2	148	-1.53496	-0.863109	33.2	3.22394	0	0	0	0	0	0	0	0	0	0		1	0	0		1	0	0	1	0	1	0	0	0	0	0	2	0	0	1	0	1	1	2
NA_013_047	4	4	Nakaramwae	13	Lore Alochiyo	1	8	1	15.6	23.4	128	-0.656391	0.0273871	23.4	2.89575	0	0	0	0	0	0	0	0	0	0		1	0	0		1	0	0	3	0	3	6	1	0	0	2	3	0	0	3	0	3	10	5
NA_013_048	4	4	Nakaramwae	13	Lore Alochiyo	1	13	0	19	37.2	162	-1.16382	0.969894	37.2	3.52705	0	0	0	0	0	0	0	0	0	0		1	1	0		1	0	0	13	0	5	0	0	0	3	2	5	0	0	13	0	13	5	10
NA_013_049	4	4	Nakaramwae	13	Lore Amerinyang	1	10	0	18.9	27.7	141	-0.898326	0.404211	27.7	2.88129	0	0	0	0	0	0	0	0	0	0		1	1	0		1	0	2	6	0	4	1	0	0	0	1	2	0	0	8	0	8	5	3
NA_013_050	4	4	Nakaramwae	13	Lore Alochiyo	1	10	1	19.2	33.3	145	0.357186	1.06901	33.3	3.61491	0	0	0	0	0	0	0	0	0	0		1	1	0		1	0	1	2	1	6	1	0	0	0	5	7	0	0	3	5	8	7	12
NA_013_053	4	4	Nakaramwae	13	Lore Alochiyo	1	10	1	17.4	29.2	137	-0.451994	-0.2248	29.2	3.24713	0	0	0	0	0	0	0	0	0	0		1	0	0		1	0	1	2	0	1	10	0	0	4	2	6	0	0	3	0	3	11	12
NA_013_054	4	4	Nakaramwae	13	Lore Alochiyo	1	11	0	18.1	30.6	148	-0.904923	0.562634	30.6	3.09382	0	0	0	0	0	0	0	0	0	0		1	0	1	4	1	2	0	9	5	12	4	0	0	2	5	5	0	0	11	25	36	16	12
NA_013_055	4	4	Nakaramwae	13	Lore Alochiyo	1	14	0	22.6	41.3	163	-1.22514	0.518031	41.3	3.78209	0	0	0	0	0	0	0	0	0	0		1	1	0		1	1	2	6	2	9	1	0	0	3	7	1	4	1	9	10	19	10	15
NA_013_056	4	4	Nakaramwae	13	Lore Alochiyo	1	14	0	22.9	49.6	170	-0.056334	1.58771	49.6	4.2714	0	0	0	0	0	0	0	0	0	0		1	1	0		1	0	0	5	0	6	0	1	0	1	2	2	0	0	5	0	5	7	5
NA_013_057	4	4	Nakaramwae	13	Lore Amerinyang	1	13	0	23.3	42.4	159	-0.388482	0.536906	42.4	3.91537	0	0	0	0	0	0	0	0	0	0		1	1	0		1	0	0	13	0	9	0	0	0	7	3	4	0	0	13	0	13	9	14
NA_013_058	4	4	Nakaramwae	13	Lore Angoriaale	1	10	0	19.6	31.6	147	-0.123257	1.34789	31.6	3.37786	0	0	0	0	0	0	0	0	0	0		1	1	0		1	0	0	1	0	1	0	0	0	0	0	0	0	0	1	0	1	1	0
NA_013_059	4	4	Nakaramwae	13	Lore Alochiyo	1	14	0	21.2	39.9	163	-1.45213	0.518031	39.9	3.67661	0	0	1	0	0	0	0	0	1	0		1	1	0		1	1	0	24	0	15	3	1	0	2	1	6	0	0	25	0	25	19	9
NA_013_060	4	4	Nakaramwae	13	Lore Alochiyo	1	10	0	18.3	30.1	147	-0.400826	1.34789	30.1	3.20465	0	0	0	0	0	0	0	0	0	0		1	1	0		1	0	0	10	0	5	0	0	0	0	0	2	0	0	10	0	10	5	2
NA_013_061	4	4	Nakaramwae	13	Lore Angoriaale	1	12	0	20.4	32.4	147	-1.21613	-0.38758	32.4	3.16094	0	0	1	1	0	0	0	0	1	1	Wounds	1	1	1	1	1	0	1	5	0	4	1	0	0	2	0	2	0	0	6	0	6	5	4
NA_013_062	4	4	Nakaramwae	13	Lore Alochiyo	1	10	0	18.9	30.1	144	-0.400826	0.87605	30.1	3.20465	0	0	0	0	0	0	0	0	0	0		1	1	0		1	0	0	1	0	1	0	0	0	2	3	8	1	3	1	0	1	1	14
NA_013_063	4	4	Nakaramwae	13	Lore Alochiyo	1	10	0	17.9	25.5	136	-1.4245	-0.382189	25.5	2.52144	0	0	0	0	0	0	0	0	0	0		1	1	0		1	1	1	5	0	5	0	0	0	1	0	0	0	0	7	0	7	5	1
NA_013_064	4	4	Nakaramwae	13	Lore Angoriaale	1	11	0	19.2	30.1	138	-1.00118	-0.887452	30.1	3.03171	0	0	0	0	0	0	0	0	0	0		1	1	0		1	0	0	4	0	4	0	0	0	0	0	6	0	0	4	0	4	4	6
NA_013_065	4	4	Nakaramwae	13	Lore Alochiyo	1	13	0	21	42.9	164	-0.320392	1.25855	42.9	3.94709	0	0	0	0	0	0	0	0	0	0		1	1	0		1	0	2	7	0	3	0	2	0	3	7	2	0	3	9	0	9	5	12
NA_013_066	4	4	Nakaramwae	13	Lore Amerinyang	1	10	0	16.7	25	140	-1.55516	0.246931	25	2.42925	0	0	0	0	0	0	0	0	0	0		1	1	0		1	0	0	2	0	1	4	0	0	0	1	3	0	0	2	0	2	5	4
NA_013_067	4	4	Nakaramwae	13	Lore Alochiyo	1	10	0	20.4	39.3	165	1.0078	4.17893	39.3	4.02976	0	0	1	0	0	0	0	0	1	0		1	0	0		1	2	12	21	2	15	6	5	0	5	10	8	0	2	35	10	45	26	23
NA_013_068	4	4	Nakaramwae	13	Lore Alochiyo	1	10	0	16.8	25.6	140	-1.3989	0.246931	25.6	2.53937	0	0	0	0	0	0	0	0	0	0		1	1	0		1	0	8	11	1	9	0	0	0	0	6	6	2	8	19	5	24	9	14
NA_013_069	4	4	Nakaramwae	13	Lore Amerinyang	1	13	1	16.9	28.1	139	-2.66137	-2.01052	28.1	2.65148	1	1	1	0	0	0	0	0	0	1	Wound	1	1	0		1	1	0	6	0	10	1	0	0	0	1	1	0	0	7	0	7	11	2
NA_013_070	4	4	Nakaramwae	13	Lore Amerinyang	1	10	0	16.6	26.4	132	-1.20011	-1.01131	26.4	2.67714	0	0	0	0	0	0	0	0	0	0		1	1	0		1	6	22	15	0	13	5	0	1	5	6	9	1	8	43	0	43	19	21
NA_013_072	4	4	Nakaramwae	13	Lore Amerinyang	1	8	0	17	22.6	123	-0.880839	-0.792973	22.6	2.38999	0	0	0	0	0	0	0	0	0	0		1	0	0		1	0	3	9	0	8	1	0	0	0	0	5	1	3	12	0	12	9	6
NA_013_073	4	4	Nakaramwae	13	Lore Amerinyang	1	10	0	15.2	20.4	121	-3.01118	-2.74139	20.4	1.32675	2	1	0	0	0	0	0	0	0	0		1	1	0		1	0	0	8	0	4	0	0	0	0	1	7	0	0	8	0	8	4	8
NA_013_074	4	4	Nakaramwae	13	Lore Amerinyang	1	8	0	15.6	21	119	-1.39767	-1.52382	21	1.97099	0	0	0	0	0	0	0	0	0	0		1	1	0		1	0	0	1	0	0	0	0	0	0	0	8	0	0	1	0	1	0	8
NA_013_075	4	4	Nakaramwae	13	Lore Amerinyang	1	8	0	16.2	23.2	128	-0.703539	0.120591	23.2	2.52978	0	0	0	0	0	0	0	0	0	0		1	1	0		1	0	2	4	0	6	0	0	1	0	2	8	1	1	6	0	6	7	11
NA_013_076	4	4	Nakaramwae	13	Lore Alochiyo	1	10	0	16	23.2	130	-2.06544	-1.32587	23.2	2.05853	1	0	0	0	0	0	0	0	0	0		1	1	0		1	0	0	4	0	3	0	0	0	1	0	2	0	0	4	0	4	3	3
NA_013_077	4	4	Nakaramwae	13	Lore Alochiyo	1	8	0	15.6	18.4	120	-2.4069	-1.34111	18.4	1.10424	1	0	1	0	1	0	0	0	0	0		1	1	0		1	4	0	20	0	10	2	2	2	1	0	5	1	5	24	0	24	16	7
NA_013_078	4	4	Nakaramwae	13	Lore Alochiyo	1	8	0	16.6	21	121	-1.39767	-1.1584	21	1.97099	0	0	0	0	0	0	0	0	0	0		1	1	0		1	0	0	8	0	10	1	0	0	0	2	3	0	1	8	0	8	11	5
NA_013_079	4	4	Nakaramwae	13	Lore Alochiyo	1	10	1	14.7	18.8	119	-4.19543	-3.13588	18.8	1.09794	2	2	0	0	0	0	0	0	0	0		1	1	0		1	1	5	11	0	8	1	0	0	0	3	5	3	4	17	0	17	9	11
NA_013_080	4	4	Nakaramwae	13	Lore Amerinyang	1	8	1	15.5	20	119	-1.93969	-1.61582	20	1.9885	0	0	0	0	0	0	0	0	0	0		1	1	0		1	3	13	16	0	15	6	1	0	1	5	8	0	4	32	0	32	22	14
NA_013_081	4	4	Nakaramwae	13	Lore Alochiyo	1	8	1	15.1	20	127	-1.93969	-0.155192	20	1.9885	0	0	0	0	0	0	0	0	0	0		1	1	0		1	5	12	5	1	13	0	0	0	0	5	6	1	4	22	5	27	13	12
NA_013_082	4	4	Nakaramwae	13	Lore Alochiyo	1	8	0	15.6	20	119	-1.75802	-1.52382	20	1.66882	0	0	0	0	0	0	0	0	0	0		1	1	1	1	1	2	19	12	0	6	5	0	0	6	3	5	0	7	33	0	33	11	14
NA_013_083	4	4	Nakaramwae	13	Lore Alochiyo	1	10	1	16.6	28.8	140	-0.543905	0.26038	28.8	3.20306	0	0	0	0	0	0	0	0	0	0		1	1	1	1	1	24	16	12	2	7	4	3	0	0	7	6	0	6	52	10	62	14	13
NA_013_084	4	4	Nakaramwae	13	Lore Amerinyang	1	8	1	15.5	22.7	131	-0.889098	0.575123	22.7	2.73984	0	0	0	0	0	0	0	0	0	0		1	1	1	3	1	24	11	8	2	9	0	0	1	0	3	6	0	7	43	10	53	10	9
NA_013_085	4	4	Nakaramwae	13	Lore Amerinyang	1	8	1	16	21	117	-1.519	-1.98098	21	2.29862	0	0	1	0	1	0	0	0	0	0		1	1	1	9	1	9	4	4	4	8	0	0	0	0	0	3	0	7	17	20	37	8	3
NA_013_086	4	4	Nakaramwae	13	Lore Alochiyo	1	10	0	18.5	26.3	134	-1.22439	-0.696749	26.3	2.66045	0	0	0	0	0	0	0	0	0	0		1	1	0		1	0	0	1	0	0	0	0	0	0	0	4	0	0	1	0	1	0	4
NA_013_087	4	4	Nakaramwae	13	Lore Alochiyo	1	10	1	16	17.8	117	-4.79928	-3.45934	17.8	0.686861	2	2	0	0	0	0	0	0	0	0		1	1	0		1	2	2	10	0	5	0	0	0	0	3	7	0	6	14	0	14	5	10
NA_013_088	4	4	Nakaramwae	13	Lore Alochiyo	1	8	0	15.6	19.2	117	-2.07037	-1.88925	19.2	1.40031	1	0	0	0	0	0	0	0	0	0		1	1	1	7	1	9	8	2	4	8	1	1	0	2	5	5	1	10	19	20	39	10	13
NA_013_089	4	4	Nakaramwae	13	Lore Angoriaale	1	8	0	16.5	19.2	117	-2.07037	-1.88925	19.2	1.40031	1	0	1	0	1	0	0	0	0	0		1	1	0		1	0	0	3	0	2	0	0	0	0	2	6	0	0	3	0	3	2	8
NA_013_090	4	4	Nakaramwae	13	Lore Alochiyo	1	8	0	15.4	18.5	110	-2.36341	-3.16824	18.5	1.14289	1	2	0	0	0	0	0	0	0	0		1	1	0		1	0	0	3	0	1	0	0	0	0	0	9	0	0	3	0	3	1	9
NA_014_001	4	5	Naoi	14	Lore Aichongat	1	8	0	15.2	18.1	116	-2.53994	-2.07196	18.1	0.985272	1	1	1	0	1	0	0	0	0	0		1	0	1	1	1	0	6	1	0	12	2	0	0	1	2	8	0	0	7	0	7	14	11
NA_014_002	4	5	Naoi	14	Lore Keekwaputh	1	11	0	18	27.1	140	-1.63739	-0.597435	27.1	2.60246	0	0	0	0	0	0	0	0	0	0		1	1	1	1	1	0	1	1	0	3	0	0	0	0	2	5	0	0	2	0	2	3	7
NA_014_003	4	5	Naoi	14	Lore Aichongat	1	8	0	17.5	24.6	126	-0.320075	-0.244834	24.6	2.82512	0	0	0	0	0	0	0	0	0	0		1	1	0		1	0	1	4	0	5	0	1	1	0	0	0	0	3	5	0	5	7	0
NA_014_004	4	5	Naoi	14	Lore Keekwaputh	1	8	0	13.4	13.1	115		-2.25467	13.1	-1.97767	0	1	0	0	0	0	0	0	0	0		1	1	0		1	1	8	7	2	9	2	0	0	2	1	7	1	1	16	10	26	11	11
NA_014_005	4	5	Naoi	14	Lore Aichongat	1	10	0	16.5	24.6	135	-1.66298	-0.539469	24.6	2.35234	0	0	1	0	1	0	0	0	0	0		1	1	1	2	1	11	27	1	0	15	4	1	0	4	9	4	6	0	39	0	39	20	23
NA_014_007	4	5	Naoi	14	Lore Keekwaputh	1	12	1	17.4	31.2	144	-1.23498	-0.606188	31.2	3.14053	0	0	0	0	0	0	0	0	0	0		1	0	0		1	0	3	1	0	1	0	0	0	0	0	0	0	0	4	0	4	1	0
NA_014_009	4	5	Naoi	14	Lore Keekwaputh	1	11	1	17.9	33.6	145	-0.171882	0.245132	33.6	3.47106	0	0	0	0	0	0	0	0	0	0		1	1	0		1	0	0	2	0	2	0	1	0	0	0	1	0	1	2	0	2	3	1
NA_014_011	4	5	Naoi	14	Lore Keekwaputh	1	12	1	15.6	27.4	140	-2.15573	-1.16232	27.4	2.69359	1	0	0	0	0	0	0	0	0	0		1	1	0		1	0	3	2	0	4	0	0	0	0	1	4	0	3	5	0	5	4	5
NA_014_012	4	5	Naoi	14	Lore Keekwaputh	1	12	1	17	31.1	147	-1.25654	-0.189086	31.1	3.1307	0	0	1	0	1	0	0	0	0	0		1	0	0		1	2	3	4	0	7	2	0	0	3	4	4	1	0	9	0	9	9	12
NA_014_013	4	5	Naoi	14	Lore Aichongat	1	12	1	15.7	25.7	133	-2.64875	-2.13556	25.7	2.43161	1	1	1	0	0	0	0	0	0	1	wounds	1	0	0		1	0	0	3	0	13	0	0	0	4	10	4	4	0	3	0	3	13	22
NA_014_016	4	5	Naoi	14	Lore Aichongat	1	8	0	14.3	21.8	126	-1.13077	-0.244834	21.8	2.1895	0	0	0	0	0	0	0	0	0	0		1	0	0		1	0	0	1	0	2	1	0	0	0	1	2	1	0	1	0	1	3	4
NA_014_017	4	5	Naoi	14	Lore Keekwaputh	1	8	1	13.1	17.1	116	-3.43871	-2.16356	17.1	0.784645	2	1	0	0	0	0	0	0	0	0		1	1	0		1	6	6	0	1	11	0	0	0	2	2	8	1	5	12	5	17	11	13
NA_014_018	4	5	Naoi	14	Lore Keekwaputh	1	8	1	14.4	20.7	120	-1.64093	-1.43324	20.7	2.21001	0	0	0	0	0	0	0	0	0	0		1	1	0		1	2	12	7	3	10	3	0	0	5	0	4	0	3	21	15	36	13	9
NA_014_020	4	5	Naoi	14	Lore Keekwaputh	1	13	1	19.9	45.1	163	0.262399	1.04924	45.1	3.92483	0	0	0	0	0	0	0	0	0	0		1	0	0		1	2	0	1	0	2	1	0	1	6	4	3	0	1	3	0	3	4	13
NA_014_021	4	5	Naoi	14	Lore Aichongat	1	8	0	12.3	15.6	117	-3.82459	-1.88925	15.6	-0.218639	2	0	1	0	1	0	0	0	0	0		1	1	0		1	0	23	5	0	13	3	0	0	4	2	4	2	0	28	0	28	16	12
NA_014_023	4	5	Naoi	14	Lore Keekwaputh	1	9	0	15.5	23.4	130	-1.32877	-0.482651	23.4	2.32584	0	0	0	0	0	0	0	0	0	0		1	1	1	2	1	0	55	0	1	11	0	0	0	3	1	7	0	0	55	5	60	11	11
NA_014_024	4	5	Naoi	14	Lore Aichongat	1	8	0	13.3	17.5	117	-2.81823	-1.88925	17.5	0.732923	1	0	1	0	0	0	0	0	0	1	dandruff	1	1	1	2	1	4	13	0	0	9	1	0	1	2	3	7	3	2	17	0	17	11	15
NA_014_025	4	5	Naoi	14	Lore Keekwaputh	1	8	1	16.5	22.3	130	-1.02865	0.392544	22.3	2.6445	0	0	1	0	1	0	0	0	0	0		1	1	0		1	8	1	0	0	4	0	0	1	1	0	6	0	1	9	0	9	5	7
NA_014_026	4	5	Naoi	14	Lore Keekwaputh	1	9	0	16.1	22.9	124	-1.47801	-1.50956	22.9	2.21408	0	0	0	0	0	0	0	0	0	0		1	1	0		1	8	5	1	3	9	0	2	1	2	1	7	1	6	14	15	29	12	11
NA_014_027	4	5	Naoi	14	Lore Aichongat	1	9	0	13.5	18	117	-3.32471	-2.70763	18	0.720852	2	1	1	0	0	0	0	0	0	1	Dandruff	1	1	0		1	13	5	1	1	11	5	2	0	3	0	5	3	5	19	5	24	18	11
NA_014_028	4	5	Naoi	14	Lore Keekwaputh	1	8	0	15	19.3	120	-2.03006	-1.34111	19.3	1.4353	1	0	0	0	0	0	0	0	0	0		1	0	0		1	1	4	4	0	9	5	0	0	5	3	6	1	2	9	0	9	14	15
NA_014_030	4	5	Naoi	14	Lore Aichongat	1	9	1	14.7	21.5	119	-2.09205	-2.46249	21.5	2.17709	1	1	0	0	0	0	0	0	0	0		1	0	0		1	0	8	6	0	5	0	0	0	1	0	6	1	2	14	0	14	5	8
NA_014_034	4	5	Naoi	14	Lore Aichongat	1	10	1	14.4	18	114	-4.67288	-3.94452	18	0.77432	2	2	1	0	1	0	0	0	0	1	wounds	1	1	0		1	0	6	0	0	2	0	0	0	0	0	5	1	0	6	0	6	2	6
NA_014_036	4	5	Naoi	14	Lore Aichongat	1	9	0	16.9	26.5	135	-0.516751	0.373111	26.5	2.9099	0	0	0	0	0	0	0	0	0	0		1	1	0		1	0	0	1	1	3	0	0	0	1	1	1	0	0	1	5	6	3	3
NA_014_037	4	5	Naoi	14	Lore Keekwaputh	1	9	1	15.7	22.3	128	-1.77954	-0.9105	22.3	2.37455	0	0	1	0	0	0	0	0	0	1	wounds	1	0	0		1	4	2	2	0	7	0	2	1	0	1	3	1	3	8	0	8	10	5
NA_014_038	4	5	Naoi	14	Lore Aichongat	1	8	0	15	21.1	124	-1.36332	-0.61026	21.1	1.99937	0	0	0	0	0	0	0	0	0	0		1	0	0		1	0	0	6	0	5	0	0	0	1	0	6	0	1	6	0	6	5	7
NA_014_039	4	5	Naoi	14	Lore Aichongat	1	9	0	16.6	24.5	131	-1.01967	-0.311498	24.5	2.55298	0	0	1	0	0	0	0	0	1	0		1	0	0		1	0	0	2	0	5	0	0	0	0	0	7	0	0	2	0	2	5	7
NA_014_040	4	5	Naoi	14	Lore Aichongat	1	10	0	16.7	24.5	132	-1.69041	-1.01131	24.5	2.33265	0	0	1	0	0	0	0	0	0	1	wounds	1	1	0		1	6	12	7	2	12	0	0	0	4	4	7	1	2	25	10	35	12	16
NA_014_042	4	5	Naoi	14	Lore Keekwaputh	1	12	1	15	23	132	-3.56947	-2.27459	23	1.89962	2	1	0	0	0	0	0	0	0	0		1	0	0		1	1	1	0	0	1	1	0	0	3	0	1	0	0	2	0	2	2	4
NA_014_043	4	5	Naoi	14	Lore Keekwaputh	1	8	0	15.2	20	122	-1.75802	-0.975685	20	1.66882	0	0	0	0	0	0	0	0	0	0		1	0	0		1	0	1	6	1	6	0	0	0	1	0	5	2	3	7	5	12	6	8
NA_014_048	4	5	Naoi	14	Lore Keekwaputh	1	11	0	18.8	32.8	149	-0.509501	0.707643	32.8	3.34121	0	0	0	0	0	0	0	0	0	0		1	0	0		1	0	1	0	0	2	0	0	0	0	1	3	2	0	1	0	1	2	6
NA_014_051	4	5	Naoi	14	Lore Aichongat	1	11	1	21	33.4	139	-0.208032	-0.657192	33.4	3.45597	0	0	0	0	0	0	0	0	0	0		1	0	0		1	25	8	7	0	9	4	1	0	3	4	5	1	7	40	0	40	14	13
NA_014_052	4	5	Naoi	14	Lore Keekwaputh	1	13	1	17.4	33.8	152	-1.42055	-0.353148	33.8	3.27606	0	0	0	0	0	0	0	0	0	0		1	0	0		1	3	7	0	0	7	2	0	0	2	1	9	0	1	10	0	10	9	12
NA_014_054	4	5	Naoi	14	Lore Aichongat	1	12	1	14.7	27.2	139	-2.21077	-1.30136	27.2	2.66513	1	0	0	0	0	0	0	0	0	0		1	1	0		1	3	3	9	1	8	3	0	0	2	0	5	0	1	15	5	20	11	7
NA_014_055	4	5	Naoi	14	Lore Keekwaputh	1	8	0	16.7	23.1	129	-0.732517	0.303304	23.1	2.50707	0	0	0	0	0	0	0	0	0	0		1	0	0		1	0	2	1	0	2	0	1	0	4	0	4	0	1	3	0	3	3	8
NA_014_056	4	5	Naoi	14	Lore Aichongat	1	10	0	12.7	17.4	119	-4.30961	-3.05595	17.4	0.228808	2	2	0	0	0	0	0	0	0	0		1	1	0		1	1	5	8	1	6	1	1	0	3	0	7	1	8	14	5	19	8	11
NA_014_060	4	5	Naoi	14	Lore Keekwaputh	1	10	1	15.9	26.8	141	-1.04672	0.422107	26.8	2.95384	0	0	0	0	0	0	0	0	0	0		1	0	0		1	3	11	0	0	8	0	0	0	4	1	4	0	4	14	0	14	8	9
NA_014_061	4	5	Naoi	14	Lore Aichongat	1	9	1	15.7	27.8	137	-0.136835	0.641489	27.8	3.31989	0	0	0	0	0	0	0	0	0	0		1	0	0		1	1	4	0	1	3	2	0	0	3	0	0	0	1	5	5	10	5	3
NA_014_063	4	5	Naoi	14	Lore Keekwaputh	1	9	1	14.3	21.3	130	-2.17401	-0.565613	21.3	2.12438	1	0	0	0	0	0	0	0	0	0		1	0	0		1	2	0	0	1	4	0	0	0	4	2	2	2	2	2	5	7	4	10
NA_014_065	4	5	Naoi	14	Lore Aichongat	1	10	1	16	21.3	118	-2.94468	-3.29761	21.3	1.89419	1	2	0	0	0	0	0	0	0	0		1	1	0		1	7	0	0	0	9	7	0	0	3	1	8	0	2	7	0	7	16	12
NA_014_067	4	5	Naoi	14	Lore Keekwaputh	1	8	1	14.1	21.3	128	-1.40052	0.0273871	21.3	2.38374	0	0	0	0	0	0	0	0	0	0		1	0	0		1	0	0	1	0	0	0	0	0	0	0	0	0	0	1	0	1	0	0
NA_014_068	4	5	Naoi	14	Lore Aichongat	1	10	1	14.6	22.6	127	-2.40851	-1.84207	22.6	2.21211	1	0	0	0	0	0	0	0	0	0		1	1	1	4	1	4	3	5	2	8	0	1	0	4	1	7	1	2	12	10	22	9	13
NA_014_070	4	5	Naoi	14	Lore Aichongat	1	12	0	19	36.3	141	-0.569927	-1.23015	36.3	3.54519	0	0	1	0	0	0	0	0	0	1	Wounds	1	0	0		1	0	0	2	0	4	2	0	0	0	0	4	0	0	2	0	2	6	4
NA_014_071	4	5	Naoi	14	Lore Keekwaputh	1	11	0	16.5	24.9	137	-2.18029	-1.03246	24.9	2.21018	1	0	1	0	0	0	0	0	0	1	Dandruff	1	1	0		1	2	6	10	0	6	0	1	0	0	0	4	1	1	18	0	18	7	5
NA_014_075	4	5	Naoi	14	Lore Keekwaputh	1	9	0	18.8	30.8	136	0.364539	0.544263	30.8	3.4968	0	0	1	0	1	0	0	0	0	0		1	1	0		1	0	0	2	0	1	0	1	0	0	0	0	1	1	2	0	2	2	1
NA_014_077	4	5	Naoi	14	Lore Keekwaputh	1	14	0	21.2	44.1	159	-0.799468	-0.0932151	44.1	3.97048	0	0	0	0	0	0	0	0	0	0		1	1	0		1	1	4	0	0	1	0	0	0	0	0	1	0	1	5	0	5	1	1
NA_014_078	4	5	Naoi	14	Lore Keekwaputh	1	10	0	19.8	34.3	144	0.323096	0.87605	34.3	3.64552	0	0	0	0	0	0	0	0	0	0		1	1	0		1	0	2	1	0	4	0	0	0	0	2	5	0	0	3	0	3	4	7
NA_014_080	4	5	Naoi	14	Lore Keekwaputh	1	10	0	16	24.5	140	-1.69041	0.246931	24.5	2.33265	0	0	0	0	0	0	0	0	0	0		1	1	0		1	7	0	0	2	13	1	0	0	6	6	7	0	0	7	10	17	14	19
NA_014_082	4	5	Naoi	14	Lore Keekwaputh	1	10	0	17.9	26.7	137	-1.12822	-0.224909	26.7	2.72632	0	0	0	0	0	0	0	0	0	0		1	1	1	1	1	1	8	13	3	7	2	2	1	2	4	6	2	3	22	15	37	12	14
NA_014_083	4	5	Naoi	14	Lore Aichongat	1	12	1	14.9	27.5	141	-2.12849	-1.02329	27.5	2.7076	1	0	0	0	0	0	0	0	0	0		1	1	0		1	10	6	4	3	7	0	2	0	1	10	9	1	10	20	15	35	9	21
NA_014_085	4	5	Naoi	14	Lore Aichongat	1	10	1	15.5	24.3	135	-1.79783	-0.548254	24.3	2.55657	0	0	1	0	1	0	0	0	0	0		1	0	0		1	1	0	10	0	5	0	0	0	0	0	3	0	0	11	0	11	5	3
NA_014_086	4	5	Naoi	14	Lore Keekwaputh	1	8	1	14.3	20.8	125	-1.5999	-0.520349	20.8	2.23995	0	0	1	0	1	0	0	0	0	0		1	1	0		1	6	4	6	1	10	2	0	0	3	0	8	0	1	16	5	21	12	11
NA_014_088	4	5	Naoi	14	Lore Keekwaputh	1	9	1	16	24.7	133	-0.968605	-0.0482839	24.7	2.86099	0	0	1	0	1	0	0	0	0	0		1	1	0		1	2	7	1	0	7	0	0	1	1	6	7	2	3	10	0	10	8	16
NA_014_089	4	5	Naoi	14	Lore Keekwaputh	1	8	1	14.5	20.7	120	-1.64093	-1.43324	20.7	2.21001	0	0	0	0	0	0	0	0	0	0		1	1	0		1	4	6	2	1	14	0	0	0	1	0	6	4	1	12	5	17	14	11
NA_015_002	4	5	Naitakosowan	15	Lore Apakoelo	1	8	1	14.9	16.7	108	-3.68644	-3.62418	16.7	0.571056	2	2	0	0	0	0	0	0	0	0		1	1	0		1	3	3	1	0	6	1	1	0	0	1	3	0	0	7	0	7	8	4
NA_015_004	4	5	Naitakosowan	15	Lore Apangaari	1	8	1	15.4	21.7	119	-1.24765	-1.61582	21.7	2.49211	0	0	0	0	0	0	0	0	0	0		1	1	0		1	0	0	3	0	3	0	0	0	0	0	2	0	0	3	0	3	3	2
NA_015_008	4	5	Naitakosowan	15	Lore Apangaari	1	13	1	17.2	28.4	140	-2.58624	-1.88303	28.4	2.69312	1	0	0	0	0	0	0	0	0	0		1	1	1	1	1	4	0	0	1	6	1	1	1	0	2	7	0	2	4	5	9	9	9
NA_015_009	4	5	Naitakosowan	15	Lore Apakoelo	1	8	1	14.8	18.5	118	-2.65622	-1.7984	18.5	1.43215	1	0	0	0	0	0	0	0	0	0		1	0	0		1	0	0	1	0	1	1	0	0	0	0	1	0	0	1	0	1	2	1
NA_015_012	4	5	Naitakosowan	15	Lore Apakoelo	1	9	1	16	25.4	135	-0.762206	0.296602	25.4	2.9787	0	0	0	0	0	0	0	0	0	0		1	0	0		1	1	2	0	0	1	0	0	0	0	0	0	0	0	3	0	3	1	0
NA_015_015	4	5	Naitakosowan	15	Lore Apangaari	1	10	1	17	24.8	130	-1.6349	-1.35689	24.8	2.64525	0	0	0	0	0	0	0	0	0	0		1	1	0		1	0	0	1	0	1	0	0	0	0	0	0	0	0	1	0	1	1	0
NA_015_016	4	5	Naitakosowan	15	Lore Apangaari	1	9	1	14.8	21.9	123	-1.93281	-1.77272	21.9	2.27839	0	0	0	0	0	0	0	0	0	0		1	0	0		1	0	0	2	0	1	0	0	0	0	0	3	0	0	2	0	2	1	3
NA_015_017	4	5	Naitakosowan	15	Lore Kaakol	1	9	1	14.3	22.3	130	-1.77954	-0.565613	22.3	2.37455	0	0	0	0	0	0	0	0	0	0		1	0	0		1	1	1	5	0	11	1	2	0	0	0	0	0	1	7	0	7	14	0
NA_015_018	4	5	Naitakosowan	15	Lore Apakoelo	1	10	1	15	25.1	136	-1.5404	-0.386527	25.1	2.69605	0	0	0	0	0	0	0	0	0	0		1	1	0		1	4	15	18	2	14	0	0	0	6	5	9	0	1	37	10	47	14	20
NA_015_020	4	5	Naitakosowan	15	Lore Apangaari	1	14	1	17	29.5	146	-3.03439	-1.97189	29.5	2.71752	2	0	0	0	0	0	0	0	0	0		1	1	0		1	0	2	4	0	4	0	0	0	0	0	4	0	0	6	0	6	4	4
NA_015_021	4	5	Naitakosowan	15	Lore Apakoelo	1	8	0	16.2	22.4	122	-0.941824	-0.975685	22.4	2.34144	0	0	0	0	0	0	0	0	0	0		1	0	0		1	0	0	3	0	3	0	1	0	0	0	2	0	2	3	0	3	4	2
NA_015_023	4	5	Naitakosowan	15	Lore Apaepela	1	9	1	15.6	23.3	125	-1.42041	-1.42783	23.3	2.59464	0	0	0	0	0	0	0	0	0	0		1	1	0		1	1	3	19	1	11	1	0	0	5	3	3	2	0	23	5	28	12	13
NA_015_026	4	5	Naitakosowan	15	Lore Kaakol	1	11	0	17	27.8	134	-1.47917	-1.46749	27.8	2.71227	0	0	0	0	0	0	0	0	0	0		1	0	0		1	0	0	2	0	0	0	1	0	0	0	6	0	0	2	0	2	1	6
NA_015_027	4	5	Naitakosowan	15	Lore Apaepela	1	8	1	15.8	19.7	114	-2.07425	-2.52871	19.7	1.88672	1	1	1	0	0	0	0	0	0	1	Skin rashes	1	1	0		1	0	1	3	0	3	0	0	0	1	1	1	0	0	4	0	4	3	3
NA_015_029	4	5	Naitakosowan	15	Lore Apakoelo	1	8	1	14.9	22.1	126	-1.10032	-0.33777	22.1	2.595	0	0	0	0	0	0	0	0	0	0		1	1	0		1	7	4	12	1	8	0	0	0	0	0	5	0	1	23	5	28	8	5
NA_015_031	4	5	Naitakosowan	15	Lore Apakoelo	1	8	1	13.4	18.5	125	-2.65622	-0.520349	18.5	1.43215	1	0	0	0	0	0	0	0	0	0		1	1	0		1	5	0	6	1	11	2	1	0	0	0	4	1	0	11	5	16	14	5
NA_015_033	4	5	Naitakosowan	15	Lore Kaakol	1	9	1	17.5	34.8	149	1.17578	2.71081	34.8	3.95756	0	0	0	0	0	0	0	0	0	0		1	1	0		1	0	1	1	0	3	0	1	0	0	1	4	1	1	2	0	2	4	6
NA_015_037	4	5	Naitakosowan	15	Lore Apangaari	1	9	1	16	26.2	138	-0.540427	0.813932	26.2	3.10238	0	0	0	0	0	0	0	0	0	0		1	1	0		1	1	2	5	0	5	0	0	0	1	0	3	0	0	8	0	8	5	4
NA_015_039	4	5	Naitakosowan	15	Lore Apakoelo	1	8	1	14.8	26.2	136	0.149804	1.48802	26.2	3.40587	0	0	0	0	0	0	0	0	0	0		1	1	0		1	3	2	7	0	6	2	0	0	1	1	3	0	4	12	0	12	8	5
NA_015_044	4	5	Naitakosowan	15	Lore Apakoelo	1	8	1	13.1	17.3	122	-3.31915	-1.06808	17.3	0.886254	2	0	0	0	0	0	0	0	0	0		1	1	0		1	0	0	2	1	2	2	0	0	0	0	4	0	2	2	5	7	4	4
NA_015_050	4	5	Naitakosowan	15	Lore Apaepela	1	9	0	17.1	25.2	136	-0.835549	0.544263	25.2	2.68548	0	0	0	0	0	0	0	0	0	0		1	0	0		1	1	0	5	0	0	0	0	0	0	0	5	2	0	6	0	6	0	7
NA_015_057	4	5	Naitakosowan	15	Lore Apaepela	1	12	1	17.3	33.5	150	-0.772275	0.228015	33.5	3.34449	0	0	1	0	0	0	0	0	1	0		1	1	0		1	0	0	2	0	0	0	0	0	0	0	0	0	2	2	0	2	0	0
NA_015_058	4	5	Naitakosowan	15	Lore Apakoelo	1	11	0	20.2	33.5	143	-0.392447	-0.162409	33.5	3.41206	0	0	0	0	0	0	0	0	0	0		1	0	0		1	3	0	1	0	2	0	0	0	0	0	0	0	2	4	0	4	2	0
NA_015_060	4	5	Naitakosowan	15	Lore Apaepela	1	8	0	16.3	24.2	139	-0.425583	2.13043	24.2	2.74482	0	0	0	0	0	0	0	0	0	0		1	1	0		1	1	3	2	0	2	0	0	0	0	1	3	0	1	6	0	6	2	4
NA_015_062	4	5	Naitakosowan	15	Lore Apakoelo	1	9	0	18.5	27.9	135	-0.203244	0.373111	27.9	3.12436	0	0	0	0	0	0	0	0	0	0		1	0	0		1	0	0	1	0	1	0	0	0	1	0	0	0	2	1	0	1	1	1
NA_015_064	4	5	Naitakosowan	15	Lore Apangaari	1	14	1	19.2	35.8	154	-1.81962	-1.00764	35.8	3.36642	0	0	0	0	0	0	0	0	0	0		1	0	0		1	0	1	2	0	1	0	0	0	0	0	5	1	3	3	0	3	1	6
NA_015_066	4	5	Naitakosowan	15	Lore Apangaari	1	14	1	16.1	29.9	146	-2.94716	-1.97189	29.9	2.76989	1	0	1	0	0	0	0	0	0	1	Dandruff	1	0	0		1	1	3	2	0	6	0	0	0	1	0	3	0	1	6	0	6	6	4
NA_015_069	4	5	Naitakosowan	15	Lore Apaepela	1	14	1	18.8	33.3	146	-2.26431	-1.97189	33.3	3.14829	1	0	1	0	0	0	0	0	0	1	Wounds	1	0	0		1	9	3	3	1	5	1	0	0	1	6	6	0	4	15	5	20	6	13
NA_015_072	4	5	Naitakosowan	15	Lore Apaepela	1	9	0	15.5	21.4	122	-1.96285	-1.85187	21.4	1.84168	0	0	0	0	0	0	0	0	0	0		1	1	0		1	15	9	7	0	6	3	2	0	4	0	3	0	3	31	0	31	11	7
NA_015_073	4	5	Naitakosowan	15	Lore Apakoelo	1	14	0	18.8	40.3	158	-1.38625	-0.246027	40.3	3.70759	0	0	0	0	0	0	0	0	0	0		1	1	0		1	0	4	20	0	11	0	0	0	0	0	6	0	1	24	0	24	11	6
NA_015_076	4	5	Naitakosowan	15	Lore Apakoelo	1	9	1	16.3	22.9	125	-1.56012	-1.42783	22.9	2.50989	0	0	1	1	0	0	0	0	0	0		1	0	0		1	1	2	1	0	0	0	0	0	1	0	1	0	0	4	0	4	0	2
NA_015_077	4	5	Naitakosowan	15	Lore Kaakol	1	10	1	16.4	24.8	132	-1.6349	-1.03343	24.8	2.64525	0	0	0	0	0	0	0	0	0	0		1	1	1	3	1	23	27	8	2	16	1	0	0	10	3	2	8	7	58	10	68	17	23
NA_015_078	4	5	Naitakosowan	15	Lore Kaakol	1	8	1	16.3	21.7	121	-1.24765	-1.25066	21.7	2.49211	0	0	1	0	1	0	0	0	0	0		1	0	0		1	2	1	5	0	4	1	0	0	1	1	2	0	1	8	0	8	5	4
NA_016_001	4	2	Lominit	16	Lore Apalopale	1	11	1	18.1	32.6	143	-0.357106	-0.0556425	32.6	3.39298	0	0	0	0	0	0	0	0	0	0		1	0	0		1	1	0	3	0	4	0	0	0	1	0	5	0	4	4	0	4	4	6
NA_016_005	4	2	Lominit	16	Lore Achuule	1	11	0	17.2	27.6	135	-1.52372	-1.32248	27.6	2.68155	0	0	1	0	0	0	0	0	0	1	Skin cracking of the legs	1	1	0		1	1	0	1	0	1	0	0	0	0	0	0	0	0	2	0	2	1	0
NA_016_007	4	2	Lominit	16	Lore Achuule	1	10	0	15.6	24.3	133	-1.74585	-0.854029	24.3	2.29271	0	0	0	0	0	0	0	0	0	0		1	1	0		1	8	3	1	0	1	0	0	0	0	0	2	0	1	12	0	12	1	2
NA_016_008	4	2	Lominit	16	Lore Achuule	1	12	0	16.1	24.3	138	-2.99574	-1.65143	24.3	1.89175	1	0	0	0	0	0	0	0	0	0		1	1	0		1	0	0	3	0	4	1	0	0	0	0	1	0	1	3	0	3	5	1
NA_016_011	4	2	Lominit	16	Lore Aloitanin	1	10	1	17	25.2	128	-1.50942	-1.68034	25.2	2.7126	0	0	1	0	0	0	0	0	0	1	Skin rashes	1	1	0		1	0	0	1	0	1	0	0	0	0	0	0	0	2	1	0	1	1	0
NA_016_012	4	2	Lominit	16	Lore Achuule	1	8	0	15.6	25.2	137	-0.167444	1.76501	25.2	2.93999	0	0	0	0	0	0	0	0	0	0		1	0	0		1	0	0	2	0	1	0	0	0	0	0	3	0	1	2	0	2	1	3
NA_016_018	4	2	Lominit	16	Lore Aloitanin	1	10	1	15.2	23.9	136	-1.93333	-0.386527	23.9	2.48178	0	0	0	0	0	0	0	0	0	0		1	1	0		1	1	1	5	0	1	1	0	0	0	1	2	0	1	7	0	7	2	3
NA_016_021	4	2	Lominit	16	Lore Apalopale	1	8	1	15.8	21.7	124	-1.24765	-0.702927	21.7	2.49211	0	0	0	0	0	0	0	0	0	0		1	1	0		1	6	1	19	0	9	0	1	0	5	1	3	0	7	26	0	26	10	9
NA_016_022	4	2	Lominit	16	Lore Achuule	1	13	0	24.5	50.6	163	0.614952	1.11422	50.6	4.34668	0	0	1	0	0	0	0	0	0	1	Wounds	1	1	0		1	1	4	10	0	8	1	0	0	1	3	4	0	3	15	0	15	9	8
NA_016_023	4	2	Lominit	16	Lore Achuule	1	10	1	14.9	23.9	136	-1.93333	-0.386527	23.9	2.48178	0	0	0	0	0	0	0	0	0	0		1	1	0		1	0	2	10	1	8	2	0	0	1	1	0	0	3	12	5	17	10	2
NA_016_024	4	2	Lominit	16	Lore Apalopale	1	13	0	22.5	48.6	160	0.390442	0.681235	48.6	4.25671	0	0	1	0	0	0	0	0	0	1	Wounds	1	1	0		1	2	2	6	0	4	0	0	0	0	1	1	0	4	10	0	10	4	2
NA_016_025	4	2	Lominit	16	Lore Achuule	1	10	1	14.5	22.3	138	-2.52643	-0.0630734	22.3	2.14342	1	0	1	0	0	0	0	0	0	1	Dandruff	1	1	0		1	3	6	2	1	10	0	1	1	2	0	2	3	1	11	5	16	12	7
NA_016_026	4	2	Lominit	16	Lore Achuule	1	12	0	23.2	41	154	0.0890739	0.595415	41	3.89836	0	0	0	0	0	0	0	0	0	0		1	1	0		1	0	2	3	0	5	0	0	0	1	0	0	0	0	5	0	5	5	1
NA_016_035	4	2	Lominit	16	Lore Apalopale	1	10	1	16.5	25.3	135	-1.47871	-0.548254	25.3	2.72897	0	0	1	0	0	0	0	0	0	1	Dandruff	1	1	0		1	2	0	10	0	10	0	1	0	1	0	1	1	2	12	0	12	11	3
NA_016_036	4	2	Lominit	16	Lore Aloitanin	1	10	0	16	25.3	142	-1.47623	0.561491	25.3	2.48508	0	0	1	0	0	0	0	0	0	1	Dead Skin	1	1	0		1	19	27	10	6	10	1	1	0	2	2	5	4	6	56	30	86	12	13
NA_016_037	4	2	Lominit	16	Lore Apalopale	1	9	0	15.3	22.6	132	-1.57038	-0.140346	22.6	2.14423	0	0	0	0	0	0	0	0	0	0		1	0	0		1	0	0	2	0	1	2	0	0	2	0	1	0	1	2	0	2	3	3
NA_016_042	4	2	Lominit	16	Lore Achuule	1	9	1	15.1	19.6	120	-2.94157	-2.29004	19.6	1.61285	1	1	0	0	0	0	0	0	0	0		1	1	0		1	0	1	4	0	2	0	0	0	1	2	0	0	2	5	0	5	2	3
NA_016_043	4	2	Lominit	16	Lore Apalopale	1	9	0	16.7	24.7	131	-0.966112	-0.311498	24.7	2.59174	0	0	0	0	0	0	0	0	0	0		1	1	0		1	0	0	2	0	0	0	0	0	1	0	0	0	0	2	0	2	0	1
NA_016_044	4	2	Lominit	16	Lore Achuule	1	10	1	15	23.9	134	-1.93333	-0.709981	23.9	2.48178	0	0	0	0	0	0	0	0	0	0		1	1	0		1	5	6	9	2	9	3	0	0	2	4	5	1	7	20	10	30	12	12
NA_016_046	4	2	Lominit	16	Lore Achuule	1	11	0	18.1	27.2	146	-1.61439	0.272617	27.2	2.61855	0	0	0	0	0	0	0	0	0	0		1	1	0		1	1	7	19	4	12	2	0	0	5	5	4	0	0	27	20	47	14	14
NA_016_047	4	2	Lominit	16	Lore Achuule	1	8	1	14.9	20	121	-1.93969	-1.25066	20	1.9885	0	0	0	0	0	0	0	0	0	0		1	1	0		1	1	2	2	0	4	7	0	0	4	0	1	0	0	5	0	5	11	5
NA_016_048	4	2	Lominit	16	Lore Apalopale	1	12	1	15.5	25.1	138	-2.83747	-1.44039	25.1	2.32711	1	0	0	0	0	0	0	0	0	0		1	0	0		1	1	0	1	0	4	1	2	0	0	0	1	0	2	2	0	2	7	1
NA_016_049	4	2	Lominit	16	Lore Achuule	1	10	0	16.5	23.5	136	-1.97572	-0.382189	23.5	2.12494	0	0	0	0	0	0	0	0	0	0		1	1	0		1	1	0	3	0	1	1	0	0	0	0	0	3	5	4	0	4	2	3
NA_016_051	4	2	Lominit	16	Lore Achuule	1	8	0	17.7	26.4	130	0.119125	0.486016	26.4	3.1515	0	0	0	0	0	0	0	0	0	0		1	0	0		1	0	1	6	0	2	0	0	0	0	0	0	0	0	7	0	7	2	0
NA_016_055	4	2	Lominit	16	Lore Achuule	1	8	0	16.5	23	133	-0.761719	1.03415	23	2.48413	0	0	0	0	0	0	0	0	0	0		1	1	1	1	1	9	19	7	2	10	1	0	0	3	3	6	3	3	35	10	45	11	15
NA_016_056	4	2	Lominit	16	Lore Achuule	1	8	0	17.2	23	126	-0.761719	-0.244834	23	2.48413	0	0	0	0	0	0	0	0	0	0		1	1	0		1	2	1	2	0	2	0	0	0	1	0	1	0	2	5	0	5	2	2
NA_016_058	4	2	Lominit	16	Lore Achuule	1	8	0	13.8	18.8	123	-2.23543	-0.792973	18.8	1.25597	1	0	0	0	0	0	0	0	0	0		1	1	0		1	1	7	4	0	3	0	0	0	0	0	2	0	0	12	0	12	3	2
NA_016_059	4	2	Lominit	16	Lore Achuule	1	8	0	14.2	20	123	-1.75802	-0.792973	20	1.66882	0	0	0	0	0	0	0	0	0	0		1	1	0		1	2	1	0	0	0	0	0	0	1	0	0	1	0	3	0	3	0	2
NA_016_064	4	2	Lominit	16	Lore Achuule	1	9	1	11.1	11.2	100			11.2	-4.9097	0	0	0	0	0	0	0	0	0	0		1	1	0		1	1	1	15	0	5	0	0	0	0	1	3	0	3	17	0	17	5	4
NA_016_067	4	2	Lominit	16	Lore Achuule	1	8	1	14.1	20	117	-1.93969	-1.98098	20	1.9885	0	0	0	0	0	0	0	0	0	0		1	1	0		1	2	3	7	0	5	0	0	0	0	0	0	2	0	12	0	12	5	2
NA_016_068	4	2	Lominit	16	Lore Achuule	1	9	1	14.5	16.8	117	-4.56224	-2.80737	16.8	0.428705	2	1	1	0	0	0	0	0	0	1	Wounds	1	0	1	1	1	0	5	20	0	9	0	1	0	2	4	5	0	0	25	0	25	10	11
NA_017_003	4	4	Lopuu	17	Lore Lokiteded	1	12	1	17	28.6	150	-1.84052	0.228015	28.6	2.85278	0	0	0	0	0	0	0	0	0	0		1	0	0		1	0	0	4	0	3	0	0	0	0	0	0	1	0	4	0	4	3	1
NA_017_004	4	4	Lopuu	17	Lore Lokiteded	1	14	1	23.2	43	167	-0.74315	0.559265	43	3.81245	0	0	0	0	0	0	0	0	0	0		1	0	0		1	0	0	1	0	0	0	0	0	0	0	0	0	1	1	0	1	0	0
NA_017_007	4	4	Lopuu	17	Lore Alokol	1	12	1	14.2	20.7	136	-4.52779	-1.71846	20.7	1.28625	2	0	1	0	1	0	0	0	0	0		1	1	1	3	1	10	15	0	4	12	1	1	0	4	2	6	0	1	25	20	45	14	12
NA_017_011	4	4	Lopuu	17	Lore Lokiteded	1	13	1	16.5	28.9	153	-2.46381	-0.225658	28.9	2.75989	1	0	0	0	0	0	0	0	0	0		1	1	0		1	0	0	3	0	3	0	0	0	0	0	5	0	1	3	0	3	3	5
NA_017_016	4	4	Lopuu	17	Lore Lokiteded	1	10	0	18.3	31.1	159	-0.213212	3.23525	31.1	3.32229	0	0	0	0	0	0	0	0	0	0		1	0	0		1	0	0	5	0	10	1	0	0	1	1	2	0	2	5	0	5	11	4
NA_017_019	4	4	Lopuu	17	Lore Lokiteded	1	8	0	15.5	16.1	124	-3.5392	-0.61026	16.1	0.0573659	2	0	1	0	1	0	0	0	0	0		1	0	0		1	1	0	2	0	2	2	0	0	1	0	3	0	1	3	0	3	4	4
NA_017_020	4	4	Lopuu	17	Lore Lokiteded	1	10	0	17.2	21.9	139	-2.47858	0.0896507	21.9	1.74597	1	0	0	0	0	0	0	0	0	0		1	1	0		1	10	2	8	0	6	0	0	0	3	1	6	1	3	20	0	20	6	11
NA_017_021	4	4	Lopuu	17	Lore Lokiteded	1	13	0	22.2	41.8	172	-0.471561	2.41319	41.8	3.87616	0	0	0	0	0	0	0	0	0	0		1	1	0		1	0	0	2	0	1	0	0	0	0	0	6	1	0	2	0	2	1	7
NA_017_023	4	4	Lopuu	17	Lore Lokiteded	1	8	0	16	17.7	121	-2.72359	-1.1584	17.7	0.819269	1	0	1	0	1	0	0	0	0	0		1	0	0		1	0	0	7	0	3	0	0	0	1	0	1	0	2	7	0	7	3	2
NA_017_024	4	4	Lopuu	17	Lore Lokiteded	1	10	0	18.9	27	139	-1.05771	0.0896507	27	2.77422	0	0	1	0	1	0	0	0	0	0		1	0	0		1	0	0	1	0	1	0	0	0	0	0	0	0	0	1	0	1	1	0
NA_017_030	4	4	Lopuu	17	Lore Alokol	1	10	0	15	19.9	131	-3.20402	-1.16859	19.9	1.17048	2	0	1	0	1	0	0	0	0	0		1	1	1	9	1	5	70	2	5	17	3	0	1	6	2	6	1	4	77	25	102	21	15
NA_017_032	4	4	Lopuu	17	Lore Lokiteded	1	10	0	16.2	19.6	125	-3.32378	-2.11227	19.6	1.07222	2	1	0	0	0	0	0	0	0	0		1	0	0		1	0	1	2	0	0	0	0	0	0	0	0	0	0	3	0	3	0	0
NA_017_036	4	4	Lopuu	17	Lore Lokiteded	1	9	1	15	19.9	133	-2.79615	-0.0482839	19.9	1.71225	1	0	0	0	0	0	0	0	0	0		1	0	1	1	1	7	5	5	0	10	1	0	0	2	1	6	2	1	17	0	17	11	11
NA_017_038	4	4	Lopuu	17	Lore Lokiteded	1	9	1	15.4	22.6	142	-1.66831	1.5037	22.6	2.44351	0	0	0	0	0	0	0	0	0	0		1	1	1	2	1	3	17	6	0	10	0	0	4	0	2	5	2	7	26	0	26	14	9
NA_017_039	4	4	Lopuu	17	Lore Lokiteded	1	12	1	16.2	27	145	-2.26656	-0.467154	27	2.63608	1	0	0	0	0	0	0	0	0	0		1	1	0		1	0	0	3	0	2	0	2	0	0	0	0	0	1	3	0	3	4	0
NA_017_040	4	4	Lopuu	17	Lore Lokiteded	1	9	1	15.5	22.2	136	-1.81731	0.469046	22.2	2.35098	0	0	0	0	0	0	0	0	0	0		1	0	0		1	1	1	1	0	1	0	0	1	0	0	1	0	0	3	0	3	2	1
NA_017_041	4	4	Lopuu	17	Lore Lokiteded	1	8	1	13.4	17.3	130	-3.31915	0.392544	17.3	0.886254	2	0	1	1	0	0	0	0	0	0		1	1	1	3	1	5	5	14	2	13	0	0	0	1	2	6	1	7	24	10	34	13	10
NA_017_043	4	4	Lopuu	17	Lore Lokiteded	1	11	1	15.5	20.4	130	-4.097	-2.01068	20.4	1.41758	2	1	1	0	1	0	0	0	0	0		1	0	0		1	2	1	1	0	2	0	0	0	0	0	0	0	0	4	0	4	2	0
NA_017_045	4	4	Lopuu	17	Lore Lokiteded	1	8	1	15.5	22.7	137	-0.889098	1.67059	22.7	2.73984	0	0	0	0	0	0	0	0	0	0		1	0	0		1	1	4	6	0	6	3	1	0	2	2	4	0	0	11	0	11	10	8
NA_017_046	4	4	Lopuu	17	Lore Lokiteded	1	8	1	13.6	18.5	122	-2.65622	-1.06808	18.5	1.43215	1	0	0	0	0	0	0	0	0	0		1	0	0		1	0	0	7	0	2	1	0	0	0	0	2	1	3	7	0	7	3	3
NA_017_049	4	4	Lopuu	17	Lore Alokol	1	13	1	19	32.7	151	-1.63286	-0.480638	32.7	3.17848	0	0	0	0	0	0	0	0	0	0		1	1	0		1	9	33	9	0	13	0	0	0	1	7	7	0	6	51	0	51	13	15
NA_017_052	4	4	Lopuu	17	Lore Apalomoe	1	8	0	13.6	15.3	109	-4.00382	-3.35095	15.3	-0.394431	2	2	1	0	1	0	0	0	0	0		1	1	0		1	2	3	1	0	3	0	0	0	1	0	3	0	3	6	0	6	3	4
NA_017_054	4	4	Lopuu	17	Lore Apalomoe	1	12	0	19	34	151	-0.938326	0.174131	34	3.33086	0	0	0	0	0	0	0	0	0	0		1	1	0		1	0	2	6	0	5	3	1	0	1	2	4	0	2	8	0	8	9	7
NA_017_056	4	4	Lopuu	17	Lore Apalomoe	1	8	1	16	24.8	132	-0.230481	0.757701	24.8	3.17108	0	0	0	0	0	0	0	0	0	0		1	1	1	40	1	0	12	21	1	9	1	1	0	0	3	4	0	5	33	5	38	11	7
NA_017_062	4	4	Lopuu	17	Lore Apalomoe	1	10	1	14.8	19.5	128	-3.8113	-1.68034	19.5	1.35049	2	0	0	0	0	0	0	0	0	0		1	1	0		1	0	4	0	2	10	4	0	0	3	2	8	0	3	4	10	14	14	13
NA_017_064	4	4	Lopuu	17	Lore Apalomoe	1	12	0	17	27.9	144	-2.11442	-0.808864	27.9	2.56054	1	0	0	0	0	0	0	0	0	0		1	0	0		1	11	35	7	3	9	1	0	2	4	2	2	0	6	53	15	68	12	8
NA_017_066	4	4	Lopuu	17	Lore Alokol	1	8	1	15.4	23.4	131	-0.656391	0.575123	23.4	2.89575	0	0	1	0	1	0	0	0	0	0		1	1	0		1	0	28	30	0	9	2	1	0	0	2	2	0	6	58	0	58	12	4
NA_017_067	4	4	Lopuu	17	Lore Alokol	1	10	1	17.2	25.8	139	-1.32886	0.0986535	25.8	2.80809	0	0	0	0	0	0	0	0	0	0		1	1	1	4	1	0	36	4	2	5	1	1	1	1	6	4	5	4	40	10	50	8	16
NA_017_068	4	4	Lopuu	17	Lore Apalomoe	1	10	0	18	29.9	144	-0.439645	0.87605	29.9	3.18001	0	0	1	0	1	0	0	0	0	0		1	1	1	3	1	6	8	3	0	4	0	0	0	2	0	1	0	2	17	0	17	4	3
NA_017_070	4	4	Lopuu	17	Lore Apalomoe	1	8	0	15.5	17.5	113	-2.81823	-2.6201	17.5	0.732923	1	1	1	0	1	0	0	0	0	0		1	0	0		1	0	1	2	0	1	1	0	0	0	0	0	0	0	3	0	3	2	0
NA_017_071	4	4	Lopuu	17	Lore Alokol	1	8	1	15	19.6	120	-2.12002	-1.43324	19.6	1.85181	1	0	0	0	0	0	0	0	0	0		1	1	0		1	1	0	2	0	5	0	0	0	0	0	1	0	0	3	0	3	5	1
NA_017_072	4	4	Lopuu	17	Lore Alokol	1	8	0	13.3	17.5	123	-2.81823	-0.792973	17.5	0.732923	1	0	0	0	0	0	0	0	0	0		1	1	1	2	1	3	4	1	0	6	0	0	0	0	0	6	1	2	8	0	8	6	7
NA_017_073	4	4	Lopuu	17	Lore Apalomoe	1	8	0	14.1	14.6	107	-4.44753	-3.71638	14.6	-0.837757	2	2	0	0	0	0	0	0	0	0		1	0	0		1	0	2	4	0	8	4	0	0	0	1	2	0	0	6	0	6	12	3
NA_017_074	4	4	Lopuu	17	Lore Apalomoe	1	8	0	14.5	18.1	124	-2.53994	-0.61026	18.1	0.985272	1	0	0	0	0	0	0	0	0	0		1	1	0		1	0	1	2	0	5	2	1	0	2	0	0	0	0	3	0	3	8	2
NA_017_075	4	4	Lopuu	17	Lore Alokol	1	8	0	14.2	13.9	107	-4.93102	-3.71638	13.9	-1.33386	2	2	1	0	1	0	0	0	0	0		1	1	0		1	2	4	1	0	3	1	0	0	0	0	6	0	3	7	0	7	4	6
NA_017_076	4	4	Lopuu	17	Lore Apalomoe	1	8	0	14.3	17.5	118	-2.81823	-1.70654	17.5	0.732923	1	0	1	0	1	0	0	0	0	1	Dandruff	1	1	1	3	1	19	8	2	0	5	0	0	0	1	0	3	0	6	29	0	29	5	4
NA_017_077	4	4	Lopuu	17	Lore Alokol	1	9	1	15	20.4	131	-2.5637	-0.39317	20.4	1.86873	1	0	1	0	1	0	0	0	0	0		2	1	1	9	1	27	10	3	1	16	1	0	0	2	8	9	1	11	40	5	45	17	20
NA_017_078	4	4	Lopuu	17	Lore Apalomoe	1	10	1	15.7	25.3	137	-1.47871	-0.2248	25.3	2.72897	0	0	0	0	0	0	0	0	0	0		1	1	0		1	2	9	4	1	8	1	0	0	1	1	2	0	7	15	5	20	9	4
NA_017_079	4	4	Lopuu	17	Lore Alokol	1	8	1	15.6	23.9	130	-0.498538	0.392544	23.9	2.99931	0	0	1	0	0	0	0	0	1	0		1	1	1	4	1	0	5	5	0	6	0	0	1	0	0	3	0	2	10	0	10	7	3
NA_017_080	4	4	Lopuu	17	Lore Alokol	1	8	1	13.5	16.8	114	-3.6234	-2.52871	16.8	0.625798	2	1	0	0	0	0	0	0	0	0		1	1	1	23	1	32	53	2	8	14	4	0	0	5	7	5	1	13	87	40	127	18	18
NA_017_081	4	4	Lopuu	17	Lore Alokol	1	9	1	16.2	22.1	129	-1.85545	-0.738056	22.1	2.32709	0	0	0	0	0	0	0	0	0	0		1	1	0		1	1	0	0	0	0	0	0	1	0	0	0	0	0	1	0	1	1	0
NA_017_082	4	4	Lopuu	17	Lore Apalomoe	1	9	1	14.3	21.2	126	-2.2156	-1.25539	21.2	2.0975	1	0	0	0	0	0	0	0	0	0		1	1	0		1	1	1	8	1	9	1	0	0	1	1	4	0	1	10	5	15	10	6
NA_018_003	4	5	Kaingolejek	18	Lore Apooreng	1	10	1	15.7	27.9	145	-0.760821	1.06901	27.9	3.09722	0	0	1	0	0	0	0	0	0	1	wounds	1	0	1	1	1	0	0	3	1	3	1	0	0	0	0	0	0	1	3	5	8	4	0
NA_018_004	4	5	Kaingolejek	18	Lore Apooreng	1	8	0	15.4	21.7	148	-1.16317	3.77485	21.7	2.16322	0	0	0	0	0	0	0	0	0	0		1	0	0		1	4	2	5	0	3	0	0	0	1	0	1	0	0	11	0	11	3	2
NA_018_007	4	5	Kaingolejek	18	Lore Apomomwo	1	12	1	20.5	46.8	173	1.0636	3.42579	46.8	4.01985	0	0	0	0	0	0	0	0	0	0		1	1	0		1	0	0	5	0	3	0	1	0	1	0	1	0	0	5	0	5	4	2
NA_018_009	4	5	Kaingolejek	18	Lore Apooreng	1	10	1	18.1	31.8	146	0.0865063	1.23074	31.8	3.49597	0	0	0	0	0	0	0	0	0	0		1	1	0		1	0	0	4	0	0	0	0	0	0	0	0	0	2	4	0	4	0	0
NA_018_012	4	5	Kaingolejek	18	Lore Apooreng	1	14	0	20.3	40.7	158	-1.3212	-0.246027	40.7	3.73789	0	0	1	0	1	0	0	0	0	0		1	0	0		1	2	0	4	0	1	0	0	0	0	1	0	2	1	6	0	6	1	3
NA_018_015	4	5	Kaingolejek	18	Lore Apomomwo	1	14	0	21.3	47.3	176	-0.353564	2.50458	47.3	4.15517	0	0	1	0	1	0	0	0	0	0		1	0	0		1	0	0	2	0	1	0	0	0	0	0	0	0	0	2	0	2	1	0
NA_018_020	4	5	Kaingolejek	18	Lore Apooreng	1	9	0	17.6	26	139	-0.635997	1.05772	26	2.8267	0	0	0	0	0	0	0	0	0	0		1	1	0		1	0	0	1	0	1	0	0	0	0	0	0	0	2	1	0	1	1	0
NA_018_022	4	5	Kaingolejek	18	Lore Alongoringole	1	9	0	16.9	24.5	134	-1.01967	0.201958	24.5	2.55298	0	0	1	0	1	0	0	0	0	0		1	0	0		1	0	0	1	0	1	0	0	0	0	1	1	0	4	1	0	1	1	2
NA_018_026	4	5	Kaingolejek	18	Lore Apooreng	1	14	0	20.7	35.9	147	-2.16145	-1.92695	35.9	3.32345	1	0	1	0	0	0	0	0	0	1	Wounds	1	1	0		1	0	0	1	0	0	0	0	0	0	0	0	0	4	1	0	1	0	0
NA_018_029	4	5	Kaingolejek	18	Lore Apooreng	1	9	1	16.3	23.9	131	-1.22	-0.39317	23.9	2.71425	0	0	1	0	1	0	0	0	0	0		1	0	0		1	2	1	1	0	1	0	0	0	0	1	0	1	1	4	0	4	1	2
NA_018_030	4	5	Kaingolejek	18	Lore Apooreng	1	8	0	16	21.5	125	-1.22878	-0.427547	21.5	2.10979	0	0	1	0	1	0	0	0	0	0		1	1	0		1	0	0	1	0	1	1	0	0	0	0	0	0	0	1	0	1	2	0
NA_018_035	4	5	Kaingolejek	18	Lore Apooreng	1	8	1	13.6	19.4	123	-2.21297	-0.885506	19.4	1.78047	1	0	0	0	0	0	0	0	0	0		1	0	0		1	0	0	9	0	6	0	0	0	1	7	7	0	5	9	0	9	6	15
NA_018_036	4	5	Kaingolejek	18	Lore Apomomwo	1	10	0	17.1	26.9	139	-1.08106	0.0896507	26.9	2.75839	0	0	1	0	0	0	0	0	0	1	Wounds	1	1	0		1	0	0	3	0	1	0	0	0	0	0	0	0	0	3	0	3	1	0
NA_018_037	4	5	Kaingolejek	18	Lore Apooreng	1	8	0	17.1	26.9	136	0.231759	1.58229	26.9	3.23313	0	0	0	0	0	0	0	0	0	0		1	0	0		1	2	0	4	0	3	0	0	0	0	1	3	1	0	6	0	6	3	5
NA_018_039	4	5	Kaingolejek	18	Lore Apooreng	1	11	0	14.5	21.4	133	-3.22277	-1.6125	21.4	1.38885	2	0	0	0	0	0	0	0	0	0		1	0	0		1	3	0	2	0	2	0	1	0	0	1	2	0	1	5	0	5	3	3
NA_018_040	4	5	Kaingolejek	18	Lore Apooreng	1	8	1	14.3	18.4	133	-2.70816	0.94028	18.4	1.39046	1	0	1	0	0	0	0	0	0	1	Wounds	1	0	0		1	2	0	4	0	3	0	0	0	0	2	0	0	2	6	0	6	3	2
NA_018_043	4	5	Kaingolejek	18	Lore Apooreng	1	8	1	13.6	18.1	117	-2.86741	-1.98098	18.1	1.26148	1	0	1	0	1	0	0	0	0	0		1	0	0		1	0	3	5	0	7	3	1	0	2	0	0	0	2	8	0	8	11	2
NA_018_044	4	5	Kaingolejek	18	Lore Apomomwo	1	8	0	15.8	20.4	123	-1.61009	-0.792973	20.4	1.79385	0	0	0	0	0	0	0	0	0	0		1	0	0		1	1	0	2	0	1	0	0	0	1	0	0	0	1	3	0	3	1	1
NA_018_045	4	5	Kaingolejek	18	Lore Apooreng	1	8	0	15.6	21.5	122	-1.22878	-0.975685	21.5	2.10979	0	0	0	0	0	0	0	0	0	0		1	1	0		1	1	0	4	0	1	0	1	0	0	0	0	0	1	5	0	5	2	0
NA_018_050	4	5	Kaingolejek	18	Lore Apooreng	1	8	1	13.9	18.5	121	-2.65622	-1.25066	18.5	1.43215	1	0	0	0	0	0	0	0	0	0		1	1	0		1	0	0	4	0	6	1	0	0	0	0	1	0	3	4	0	4	7	1
NA_018_051	4	5	Kaingolejek	18	Lore Apooreng	1	8	1	14	18.8	119	-2.50375	-1.61582	18.8	1.55349	1	0	0	0	0	0	0	0	0	0		1	1	1	1	1	0	0	4	0	2	0	0	0	2	0	0	0	1	4	0	4	2	2
NA_018_052	4	5	Kaingolejek	18	Lore Apooreng	1	8	1	14	20	120	-1.93969	-1.43324	20	1.9885	0	0	0	0	0	0	0	0	0	0		1	0	0		1	0	0	2	0	2	0	0	0	1	0	1	0	0	2	0	2	2	2
NA_018_054	4	5	Kaingolejek	18	Lore Apooreng	1	8	1	13.6	16.5	113	-3.81482	-2.71129	16.5	0.458753	2	1	0	0	0	0	0	0	0	0		1	1	0		1	3	4	3	0	5	2	2	1	0	2	1	0	5	10	0	10	10	3
NA_018_057	4	5	Kaingolejek	18	Lore Apameri	1	8	0	13.5	15.2	107	-4.06497	-3.71638	15.2	-0.454839	2	2	1	0	1	0	0	0	0	0		1	0	0		1	0	0	1	0	0	0	0	0	0	0	0	0	0	1	0	1	0	0
NA_018_058	4	5	Kaingolejek	18	Lore Apameri	1	8	0	13.8	16.7	112	-3.21697	-2.80281	16.7	0.363154	2	1	0	0	0	0	0	0	0	0		1	0	0		1	0	0	1	0	1	0	0	0	0	0	0	0	0	1	0	1	1	0
NA_018_059	4	5	Kaingolejek	18	Lore Apomomwo	1	8	0	13.5	15.9	108	-3.65143	-3.53366	15.9	-0.0505959	2	2	0	0	0	0	0	0	0	0		1	1	0		1	1	0	0	0	1	2	0	3	0	0	0	0	0	1	0	1	6	0
NA_018_060	4	5	Kaingolejek	18	Lore Apomomwo	1	8	0	14.1	15.8	112	-3.7085	-2.80281	15.8	-0.105779	2	1	0	0	0	0	0	0	0	0		1	0	0		1	0	1	3	0	4	0	0	0	0	0	1	2	0	4	0	4	4	3
NA_018_062	4	5	Kaingolejek	18	Lore Apooreng	1	8	1	15	21.1	127	-1.47913	-0.155192	21.1	2.32738	0	0	1	0	0	0	0	0	0	1	Skin rashes	1	1	0		1	0	1	1	0	9	1	0	0	0	1	10	0	0	2	0	2	10	11
NA_019_001	4	5	Angaro	19	Lore Alokiru	1	8	1	14.7	22.7	131	-0.889098	0.575123	22.7	2.73984	0	0	0	0	0	0	0	0	0	0		1	1	0		1	2	0	4	0	1	0	1	0	1	0	0	0	1	6	0	6	2	1
NA_019_002	4	5	Angaro	19	Lore Amoding	1	10	0	17.3	30.8	149	-0.268392	1.66245	30.8	3.28794	0	0	1	0	0	0	0	0	0	1	Cracking feet	1	1	0		1	0	0	5	0	3	3	0	0	0	0	0	0	2	5	0	5	6	0
NA_019_004	4	5	Angaro	19	Lore Amoding	1	10	0	16.6	27.4	147	-0.965774	1.34789	27.4	2.83619	0	0	0	0	0	0	0	0	0	0		1	1	0		1	0	0	3	0	2	0	0	0	0	0	5	0	0	3	0	3	2	5
NA_019_007	4	5	Angaro	19	Lore Amoding	1	12	0	22.9	47.1	166	0.800048	2.28055	47.1	4.23805	0	0	1	0	0	0	0	0	0	1	Wounds	1	1	0		1	0	0	1	0	1	1	0	0	1	1	1	0	0	1	0	1	2	3
NA_019_008	4	5	Angaro	19	Lore Aporengen	1	10	0	19.9	39.3	160	1.0078	3.39253	39.3	4.02976	0	0	1	0	0	0	0	0	0	1	Several Wounds on the legs but come on their own	1	1	0		1	3	2	4	0	4	2	0	0	0	0	1	0	0	9	0	9	6	1
NA_019_010	4	5	Angaro	19	Lore Aporengen	1	8	1	13.4	17.9	120	-2.97655	-1.43324	17.9	1.17209	1	0	1	0	0	0	0	0	0	1	Dandruff	1	1	0		1	2	23	4	0	6	1	0	1	5	0	3	7	3	29	0	29	8	15
NA_019_011	4	5	Angaro	19	Lore Aporengen	1	10	1	14.8	23.3	135	-2.14574	-0.548254	23.3	2.36265	1	0	1	0	0	0	0	0	0	1	Dandruff	1	0	0		1	0	5	11	0	5	0	0	0	4	0	5	4	2	16	0	16	5	13
NA_019_013	4	5	Angaro	19	Lore Aporengen	1	10	1	16.7	31.7	148	0.0675051	1.5542	31.7	3.48747	0	0	0	0	0	0	0	0	0	0		1	1	0		1	0	0	5	0	2	0	0	0	0	0	2	0	2	5	0	5	2	2
NA_019_017	4	5	Angaro	19	Lore Aporengen	1	10	1	14.9	26	147	-1.27061	1.39247	26	2.83852	0	0	1	0	0	0	0	0	1	1	Wound	1	1	1	6	1	11	5	1	4	1	2	1	0	3	4	6	1	1	17	20	37	4	14
NA_019_018	4	5	Angaro	19	Lore Alokiru	1	8	1	12.5	16	133	-4.14984	0.94028	16	0.160513	2	0	1	0	0	0	0	0	1	0		1	1	0		1	32	12	10	1	6	1	0	0	1	1	8	2	3	54	5	59	7	12
NA_019_019	4	5	Angaro	19	Lore Aporengen	1	8	1	13.5	19.5	125	-2.16626	-0.520349	19.5	1.8164	1	0	1	0	1	0	0	0	0	0		1	1	1	12	1	17	3	12	2	12	2	2	0	3	1	6	0	8	32	10	42	16	10
NA_019_020	4	5	Angaro	19	Lore Aporengen	1	8	1	13.2	17.1	116	-3.43871	-2.16356	17.1	0.784645	2	1	0	0	0	0	0	0	0	0		1	1	0		1	0	12	4	1	11	4	0	0	1	0	2	1	7	16	5	21	15	4
NA_019_023	4	5	Angaro	19	Lore Amoding	1	8	1	13.4	20.1	132	-1.89573	0.757701	20.1	2.02148	0	0	0	0	0	0	0	0	0	0		1	1	0		1	0	3	3	0	4	1	0	1	1	0	1	0	2	6	0	6	6	2
NA_019_024	4	5	Angaro	19	Lore Amoding	1	11	1	17.9	29.9	140	-0.919692	-0.506804	29.9	3.14404	0	0	0	0	0	0	0	0	0	0		1	0	0		1	0	0	2	0	2	1	0	0	1	0	3	0	2	2	0	2	3	4
NA_019_025	4	5	Angaro	19	Lore Amoding	1	11	1	17.7	32.5	150	-0.376261	0.997068	32.5	3.38479	0	0	0	0	0	0	0	0	0	0		1	0	0		1	3	7	10	0	7	0	2	0	0	2	5	0	5	20	0	20	9	7
NA_019_027	4	5	Angaro	19	Lore Amoding	1	8	0	14.8	20.6	126	-1.53805	-0.244834	20.6	1.85424	0	0	0	0	0	0	0	0	0	0		1	0	0		1	0	0	4	0	3	0	0	0	0	0	0	0	1	4	0	4	3	0
NA_019_031	4	5	Angaro	19	Lore Amoding	1	8	0	14.9	19	114	-2.15212	-2.43739	19	1.32903	1	1	0	0	0	0	0	0	0	0		1	0	0		1	2	0	4	0	6	2	1	0	1	3	7	0	3	6	0	6	9	11
NA_019_033	4	5	Angaro	19	Lore Amoding	1	8	0	19.1	28.3	127	0.528115	-0.0621217	28.3	3.44384	0	0	1	0	0	0	0	0	1	0		1	0	1	1	1	1	0	0	0	1	0	0	0	0	1	1	0	2	1	0	1	1	2
NA_019_035	4	5	Angaro	19	Lore Amoding	1	14	0	23.4	49.3	164	-0.0940892	0.670842	49.3	4.25693	0	0	1	0	0	0	0	0	0	1	Wound,hard Skin on the Soles of both feet	1	0	0		1	0	1	4	0	2	2	0	0	3	3	3	0	0	5	0	5	4	9
NA_019_038	4	5	Angaro	19	Lore Amoding	1	10	0	18	26	133	-1.29818	-0.854029	26	2.60949	0	0	1	0	0	0	0	0	0	1	Cracking of feet	1	0	0		1	0	1	0	0	0	0	0	0	0	0	1	0	3	1	0	1	0	1
NA_020_009	5	3	Lokupoi TC-Lokitela	20	Lore Akotol	1	10	1	16.7	25.7	133	-1.35834	-0.871708	25.7	2.79261	0	0	0	0	0	0	0	0	0	0		1	0	0		1	0	0	0	1	2	1	0	0	1	5	4	0	1	0	5	5	3	10
NA_020_012	5	3	Lokupoi TC-Lokitela	20	Lore Akotol	1	12	0	20	37.4	160	-0.405229	1.43798	37.4	3.63703	0	0	0	0	0	0	0	0	0	0		1	0	0		1	3	1	1	0	3	1	0	0	0	1	1	0	0	5	0	5	4	2
NA_020_016	5	3	Lokupoi TC-Lokitela	20	Lore Akotol	1	14	1	20	38	154	-1.46166	-1.00764	38	3.52705	0	0	0	0	0	0	0	0	0	0		1	0	0		1	0	0	4	0	1	2	0	0	0	0	1	1	1	4	0	4	3	2
NA_020_017	5	3	Lokupoi TC-Lokitela	20	Lore Akotol	1	12	0	18	26.9	143	-2.34235	-0.949292	26.9	2.39536	1	0	0	0	0	0	0	0	0	0		1	0	0		1	0	1	0	0	4	1	0	0	0	0	2	0	1	1	0	1	5	2
NA_020_020	5	3	Lokupoi TC-Lokitela	20	Lore Apaangakorio	1	8	1	15.5	18.3	113	-2.76066	-2.71129	18.3	1.34813	1	1	1	0	1	0	0	0	0	0		1	0	0		1	3	2	7	0	6	3	0	1	1	2	4	0	1	12	0	12	10	7
NA_020_023	5	3	Lokupoi TC-Lokitela	20	Lore Akotol	1	8	0	15.6	18.2	120	-2.49516	-1.34111	18.2	1.02544	1	0	0	0	0	0	0	0	0	0		1	0	0		1	0	6	3	0	5	2	0	1	0	1	3	1	1	9	0	9	8	5
NA_020_024	5	3	Lokupoi TC-Lokitela	20	Lore Akotol	1	14	1	21.5	43.2	156	-0.71678	-0.76658	43.2	3.82204	0	0	0	0	0	0	0	0	0	0		1	0	0		1	0	0	6	0	9	1	0	0	3	1	6	0	1	6	0	6	10	10
NA_020_030	5	3	Lokupoi TC-Lokitela	20	Lore Apaangakorio	1	11	0	19	33.3	150	-0.42549	0.852651	33.3	3.39217	0	0		0	0	0	0	0	0	0		1	0	0		1	1	0	1	0	0	0	2	0	0	0	1	0	3	2	0	2	2	1
NA_020_034	5	3	Lokupoi TC-Lokitela	20	Lore Akotol	1	12	0	19.5	32.8	145	-1.14488	-0.668436	32.8	3.20521	0	0	0	0	0	0	0	0	0	0		1	0	1	1	1	5	4	12	0	6	2	1	0	1	8	9	1	4	21	0	21	9	19
NA_020_038	5	3	Lokupoi TC-Lokitela	20	Lore Apaangakorio	1	13	0	24	43.2	159	-0.280024	0.536906	43.2	3.96572	0	0	0	0	0	0	0	0	0	0		1	0	0		1	1	0	0	0	0	0	0	0	0	0	0	0	1	1	0	1	0	0
NA_020_039	5	3	Lokupoi TC-Lokitela	20	Lore Akotol	1	9	1	14	16.2	119	-4.98603	-2.46249	16.2	0.0964429	2	1	0	0	0	0	0	0	0	0		1	1	0		1	6	10	2	1	6	2	0	0	4	0	5	0	0	18	5	23	8	9
NA_020_040	5	3	Lokupoi TC-Lokitela	20	Lore Apaangakorio	1	11	0	18.5	29.1	136	-1.20158	-1.17747	29.1	2.90002	0	0	0	0	0	0	0	0	0	0		1	0	0		1	0	0	2	0	1	0	1	0	0	0	0	0	0	2	0	2	2	0
NA_020_041	5	3	Lokupoi TC-Lokitela	20	Lore Aloibok	1	11	1	15	23.5	136	-2.77522	-1.10835	23.5	2.20063	1	0	1	0	1	0	0	0	0	0		1	0	0		1	0	0	13	0	4	1	0	0	0	1	1	0	0	13	0	13	5	2
NA_020_044	5	3	Lokupoi TC-Lokitela	20	Lore Aloibok	1	12	0	18	30.4	144	-1.59204	-0.808864	30.4	2.91932	0	0	0	0	0	0	0	0	0	0		1	1	0		1	0	1	3	0	3	2	0	0	1	0	3	0	1	4	0	4	5	4
NA_020_045	5	3	Lokupoi TC-Lokitela	20	Lore Aloibok	1	12	1	16.5	33	152	-0.867778	0.506083	33	3.30352	0	0	1	0	1	0	0	0	0	0		1	1	0		1	0	0	7	0	8	0	0	1	0	0	4	0	1	7	0	7	9	4
NA_020_046	5	3	Lokupoi TC-Lokitela	20	Lore Aloibok	1	8	0	15.5	21.3	122	-1.29548	-0.975685	21.3	2.05519	0	0	0	0	0	0	0	0	0	0		1	1	0		1	2	1	0	0	11	0	0	0	0	0	9	0	6	3	0	3	11	9
NA_020_047	5	3	Lokupoi TC-Lokitela	20	Lore Aloibok	1	8	1	15	19.3	117	-2.26018	-1.98098	19.3	1.74402	1	0	0	0	0	0	0	0	0	0		1	0	0		1	4	0	1	0	2	0	1	0	0	2	2	0	1	5	0	5	3	4
NA_020_049	5	3	Lokupoi TC-Lokitela	20	Lore Aloibok	1	10	1	15	21.7	127	-2.77253	-1.84207	21.7	1.99783	1	0	1	0	1	0	0	0	0	0		1	1	1	9	1	3	8	20	3	16	4	0	0	5	7	9	0	2	31	15	46	20	21
NA_020_052	5	3	Lokupoi TC-Lokitela	20	Lore Aloibok	1	8	1	14	18.4	120	-2.70816	-1.43324	18.4	1.39046	1	0	0	0	0	0	0	0	0	0		1	1	0		1	0	1	5	0	2	1	0	0	1	1	1	0	0	6	0	6	3	3
NA_020_053	5	3	Lokupoi TC-Lokitela	20	Lore Akotol	1	10	1	16.5	24.9	137	-1.60313	-0.2248	24.9	2.66238	0	0	0	0	0	0	0	0	0	0		1	1	0		1	4	12	4	1	13	1	0	0	2	0	8	0	1	20	5	25	14	10
NA_020_055	5	3	Lokupoi TC-Lokitela	20	Lore Apaangakorio	1	8	1	14.5	17.2	117	-3.37858	-1.98098	17.2	0.835866	2	0	0	0	0	0	0	0	0	0		1	0	0		1	0	0	3	0	1	0	0	0	1	1	1	0	1	3	0	3	1	3
NA_020_056	5	3	Lokupoi TC-Lokitela	20	Lore Akotol	1	8	0	15	17.2	114	-2.96387	-2.43739	17.2	0.598981	1	1	1	0	1	0	0	0	0	0		1	0	0		1	0	1	0	0	0	0	0	0	0	0	0	0	0	1	0	1	0	0
NA_020_057	5	3	Lokupoi TC-Lokitela	20	Lore Apaangakorio	1	8	1	13.1	16.6	116	-3.75024	-2.16356	16.6	0.515381	2	1	1	0	0	0	0	0	0	1	Rashes	1	1	1	6	1	3	0	17	0	6	2	7	0	0	0	4	0	4	20	0	20	15	4
NA_020_062	5	3	Lokupoi TC-Lokitela	20	Lore Aloibok	1	8	1	17	20.6	117	-1.68236	-1.98098	20.6	2.17966	0	0	0	0	0	0	0	0	0	0		1	0	0		1	1	0	0	0	0	0	0	0	0	0	0	0	0	1	0	1	0	0
NA_020_064	5	3	Lokupoi TC-Lokitela	20	Lore Akotol	1	8	0	14.5	19.4	119	-1.99012	-1.52382	19.4	1.46987	0	0	1	0	1	0	0	0	0	0		1	0	0		1	0	0	1	0	0	0	0	0	0	0	0	0	1	1	0	1	0	0
NA_021_016	5	6	Kanaura	21	Not applicable	0	12	0	19.8	34	149	-0.938326	-0.106724	34	3.33086	0	0	0	0	0	0	0	0	0	0		1	0	0		1	0	0	1	0	1	0	1	0	0	0	1	0	0	1	0	1	2	1
NA_021_020	5	6	Kanaura	21	Not applicable	0	13	0	19.9	37.6	155	-1.09936	-0.0404121	37.6	3.56129	0	0	0	0	0	0	0	0	0	0		1	0	0		1	0	0	5	0	4	2	2	1	0	0	4	0	3	5	0	5	9	4
NA_021_023	5	6	Kanaura	21	Not applicable	0	12	1	19.8	34.3	150	-0.624841	0.228015	34.3	3.4066	0	0	1	0	0	0	0	0	0	1	Wounds	1	0	0		1	0	1	0	0	0	0	0	0	0	0	5	0	0	1	0	1	0	5
NA_021_025	5	6	Kanaura	21	Not applicable	0	8	1	14.8	18.2	120	-2.81374	-1.43324	18.2	1.30514	1	0	0	0	0	0	0	0	0	0		1	0	0		1	0	0	1	0	1	0	0	0	0	0	1	0	0	1	0	1	1	1
NA_021_026	5	6	Kanaura	21	Not applicable	0	8	1	16.4	28.3	135	0.64952	1.30544	28.3	3.69836	0	0	0	0	0	0	0	0	0	0		1	0	0		1	0	1	5	0	4	1	0	0	1	1	6	0	1	6	0	6	5	8
NA_021_033	5	6	Kanaura	21	Not applicable	0	8	0	19.2	28.5	135	0.568321	1.39958	28.5	3.47197	0	0	1	0	0	0	0	0	0	1	Wounds	1	0	0		1	0	1	1	0	1	0	1	0	1	0	1	0	1	2	0	2	2	2
NA_021_034	5	6	Kanaura	21	Not applicable	0	12	1	15.3	26.9	142	-2.29474	-0.884255	26.9	2.62133	1	0	0	0	0	0	0	0	0	0		1	0	0		1	0	0	1	0	1	0	1	0	1	0	0	0	0	1	0	1	2	1
NA_021_039	5	6	Kanaura	21	Not applicable	0	9	0	17.9	23.5	125	-1.29961	-1.33841	23.5	2.34753	0	0	0	0	0	0	0	0	0	0		1	0	0		1	0	0	3	0	3	0	0	0	0	0	0	0	0	3	0	3	3	0
NA_021_042	5	6	Kanaura	21	Not applicable	0	10	0	18.3	28.5	138	-0.724472	-0.0676292	28.5	2.99616	0	0	0	0	0	0	0	0	0	0		1	0	0		1	1	0	0	0	2	0	0	0	0	0	1	0	0	1	0	1	2	1
NA_021_048	5	6	Kanaura	21	Not applicable	0	13	1	15.6	23.6	134	-3.96698	-2.64797	23.6	1.8437	2	1	1	0	0	0	0	0	0	1	Wounds	1	0	0		1	0	0	4	2	2	1	0	0	1	0	1	1	0	4	10	14	3	3
NA_021_050	5	6	Kanaura	21	Not applicable	0	10	1	15.3	21.9	127	-2.68892	-1.84207	21.9	2.04762	1	0	1	0	1	0	0	0	0	0		1	0	0		1	1	0	0	0	0	1	0	0	0	0	0	0	1	1	0	1	1	0
NA_021_051	5	6	Kanaura	21	Not applicable	0	8	0	16.7	24.7	129	-0.294176	0.303304	24.7	2.84472	0	0	0	0	0	0	0	0	0	0		1	0	0		1	0	0	2	0	3	1	0	0	0	0	3	0	0	2	0	2	4	3
NA_021_067	5	6	Kanaura	21	Not applicable	0	8	1	16.7	22.5	123	-0.958252	-0.885506	22.5	2.69277	0	0	0	0	0	0	0	0	0	0		1	0	0		1	0	0	1	0	0	0	0	0	0	0	0	0	0	1	0	1	0	0
NA_021_070	5	6	Kanaura	21	Not applicable	0	11	1	16.8	22.9	127	-3.00287	-2.46184	22.9	2.07224	2	1	0	0	0	0	0	0	0	0		2	0	0		1	0	0	1	0	0	0	0	0	0	0	0	0	0	1	0	1	0	0
NA_021_074	5	6	Kanaura	21	Not applicable	0	10	0	18.2	30.5	139	-0.324508	0.0896507	30.5	3.25279	0	0	0	0	0	0	0	0	0	0		1	0	0		1	1	0	0	0	0	0	0	0	0	0	0	0	0	1	0	1	0	0
NA_021_077	5	6	Kanaura	21	Not applicable	0	10	1	14.4	17.6	116	-4.92869	-3.62106	17.6	0.59655	2	2	0	0	0	0	0	0	0	0		1	1	0		1	9	0	2	0	3	2	0	0	3	0	2	0	0	11	0	11	5	5
NA_021_083	5	6	Kanaura	21	Not applicable	0	8	1	13.8	15.8	112	-4.2898	-2.89387	15.8	0.0337133	2	1	0	0	0	0	0	0	0	0		1	0	1	1	1	0	2	4	0	2	0	0	0	0	0	2	0	0	6	0	6	2	2
NA_021_085	5	6	Kanaura	21	Not applicable	0	9	1	14.8	22.4	125	-1.74211	-1.42783	22.4	2.39783	0	0	0	0	0	0	0	0	0	0		1	0	0		1	0	1	0	0	1	0	0	0	1	0	1	0	0	1	0	1	1	2
NA_021_087	5	6	Kanaura	21	Not applicable	0	10	0	15.1	21.1	128	-2.75451	-1.64043	21.1	1.53106	1	0	0	0	0	0	0	0	0	0		1	0	0		1	0	0	3	0	2	0	0	0	0	0	0	0	0	3	0	3	2	0
NA_021_094	5	6	Kanaura	21	Not applicable	0	8	1	14.5	18.4	117	-2.70816	-1.98098	18.4	1.39046	1	0	0	0	0	0	0	0	0	0		1	0	0		1	0	0	2	0	5	0	0	0	0	0	2	0	1	2	0	2	5	2
NA_021_107	5	6	Kanaura	21	Not applicable	0	8	0	13.3	15.1	109	-4.12684	-3.35095	15.1	-0.516186	2	2	0	0	0	0	0	0	0	0		1	0	0		1	0	0	2	0	1	0	0	0	0	0	3	0	0	2	0	2	1	3
NA_021_108	5	6	Kanaura	21	Not applicable	0	10	1	15.1	23.3	130	-2.14574	-1.35689	23.3	2.36265	1	0	0	0	0	0	0	0	0	0		1	0	0		1	0	9	0	0	4	1	0	0	1	3	3	4	1	9	0	9	5	11
NA_022_045	5	6	Atedeoi	22	Not applicable	0	8	1	14.7	21.4	126	-1.36176	-0.33777	21.4	2.41137	0	0	0	0	0	0	0	0	0	0		1	0	0		1	0	0	4	0	3	1	0	0	1	0	3	0	1	4	0	4	4	4
NA_023_005	11	1	Kotipe	23	Not applicable	0	9	0	17.3	25.9	128	-0.660339	-0.824955	25.9	2.8096	0	0	0	0	0	0	0	0	0	0		1	0	0		1	0	0	3	1	4	0	0	0	1	0	0	0	1	3	5	8	4	1
NA_023_011	11	1	Kotipe	23	Not applicable	0	10	0	17.7	28.2	141	-0.78867	0.404211	28.2	2.95398	0	0	0	0	0	0	0	0	0	0		1	0	0		1	0	0	8	0	9	0	0	1	0	1	5	0	0	8	0	8	10	6
NA_023_018	11	1	Kotipe	23	Not applicable	0	12	0	18.6	30.4	144	-1.59204	-0.808864	30.4	2.91932	0	0	0	0	0	0	0	0	0	0		1	0	0		1	0	1	0	0	1	0	0	0	0	0	0	0	0	1	0	1	1	0
NA_023_045	11	1	Kotipe	23	Not applicable	0	8	1	15.7	22.1	122	-1.10032	-1.06808	22.1	2.595	0	0	0	0	0	0	0	0	0	0		1	0	0		1	1	0	2	0	3	0	0	0	0	0	3	0	3	3	0	3	3	3
NA_023_051	11	1	Kotipe	23	Not applicable	0	9	1	15.6	22.8	130	-1.59585	-0.565613	22.8	2.48804	0	0	0	0	0	0	0	0	0	0		1	0	0		1	0	0	2	0	2	0	0	0	0	0	0	0	0	2	0	2	2	0
NA_023_052	11	1	Kotipe	23	Not applicable	0	8	0	15.8	21.4	120	-1.26199	-1.34111	21.4	2.08264	0	0	0	0	0	0	0	0	0	0		1	0	0		1	0	0	1	0	1	0	0	0	0	1	1	1	0	1	0	1	1	3
NA_023_059	11	1	Kotipe	23	Not applicable	0	8	1	15.7	22.9	124	-0.821155	-0.702927	22.9	2.78576	0	0	1	0	0	0	0	0	0	1	Wound	1	0	0		1	1	0	0	0	1	0	0	0	0	0	0	0	0	1	0	1	1	0
NA_023_067	11	1	Kotipe	23	Not applicable	0	10	1	15.2	26.1	135	-1.24184	-0.548254	26.1	2.85349	0	0	0	0	0	0	0	0	0	0		1	0	0		1	0	1	3	0	5	0	0	0	1	3	4	1	0	4	0	4	5	9
NA_001_004	4	2	Lobei	1	Lore Nakaao	1	11	0	19	27.9	143	-1.45709	-0.162409	27.9	2.72743	0	0	0	0	0	0	0	0	0	0		1	0	0		0
NA_001_011	4	2	Lobei	1	Lore Nakaao	1	8	1	15.7	22.1	110	-1.10032	-3.25903	22.1	2.595	0	2	1	0	0	0	0	0	1	0		1	0	0		0
NA_001_021	4	2	Lobei	1	Lore amoses	1	12	0	19.8	37.6	155	-0.376021	0.735843	37.6	3.65307	0	0	1	0	0	0	0	0	1	0		1	0	0		0
NA_001_030	4	2	Lobei	1	Lore Kaabura	1	12	1	19.2	41.9	160	0.513173	1.61835	41.9	3.8396	0	0	0	0	0	0	0	0	0	0		1	0	0		0
NA_001_036	4	2	Lobei	1	Lore Alokee	1	8	0	17.4	29.9	142	0.836241	2.67857	29.9	3.65658	0	0	0	0	0	0	0	0	0	0		1	1	1		0
NA_002_044	4	2	Loroo	2	Lore Alorengeluka	1	8	0	14.5	27.1	112	0.27577	-2.80281	27.1	3.2648	0	1	1	0	1	0	0	0	0	0		1	0	0		0
NA_002_059	4	2	Loroo	2	Lore Aichumar	1	8	0	16.5	20.1	121	-1.72055	-1.1584	20.1	1.70062	0	0	1	0	0	0	0	0	1	0		1	0	0		0
NA_002_061	4	2	Loroo	2	Lore Aichumar	1	14	1	23	49.3	169	0.016086	0.800328	49.3	4.06566	0	0	0	0	0	0	0	0	0	0		1	0	0		0
NA_002_063	4	2	Loroo	2	Lore Kaalem	1	10	0	17	23.8	145	-1.88796	1.03333	23.8	2.1894	0	0	0	0	0	0	0	0	0	0		1	1	0		0
NA_002_106	4	2	Loroo	2	Lore Kaaguma	1	8	0	17.6	25.2	127	-0.167444	-0.0621217	25.2	2.93999	0	0	0	0	0	0	0	0	0	0		1	0	0		0
NA_003_020	4	2	Naregei-Nakoreete	3	Lore Kaaguma	1	10	0	18.9	34.3	119	0.323096	-3.05595	34.3	3.64552	0	2	0	0	0	0	0	0	0	0		1	1	0		0
NA_003_025	4	2	Naregei-Nakoreete	3	Lore Kaaguma	1	12	0	18.9	28.9	115	-1.89779	-4.88128	28.9	2.71263	0	2	0	0	0	0	0	0	0	0		1	1	0		0
NA_003_050	4	2	Naregei-Nakoreete	3	Lore Apokomol	1	9	0	18.4	28.4	135	-0.097984	0.373111	28.4	3.19497	0	0	0	0	0	0	0	0	0	0		1	1	0		0
NA_003_055	4	2	Naregei-Nakoreete	3	Lore Apokomol	1	10	0	16.6	25.5	131	-1.4245	-1.16859	25.5	2.52144	0	0	0	0	0	0	0	0	0	0		1	1	0		0
NA_004_001	4	4	Naoyaminit	4	Lore Alomerimanik	1	8	0	19.1	22.8	123	-0.820812	-0.792973	22.8	2.43755	0	0	0	0	0	0	0	0	0	0		1	0	0		0
NA_004_002	4	4	Naoyaminit	4	Lore Aporengereng	1	12	0	19.4	35.2	147	-0.741857	-0.38758	35.2	3.44671	0	0	1	0	0	0	0	0	0	1	Skin rash	1	0	0		0
NA_004_005	4	4	Naoyaminit	4	Lore Kebutur	1	8	0	15.6	22.9	134	-0.79115	1.21687	22.9	2.46096	0	0	0	0	0	0	0	0	0	0		1	0	0		0
NA_004_007	4	4	Naoyaminit	4	Lore Aporengereng	1	8	0	17.3	25.7	131	-0.045132	0.668729	25.7	3.03094	0	0	0	0	0	0	0	0	0	0		1	0	0		0
NA_004_010	4	4	Naoyaminit	4	Lore Alomerimanik	1	13	1	18.2	32.2	143	-1.73318	-1.50056	32.2	3.13107	0	0	0	0	0	0	0	0	0	0		1	0	0		0
NA_004_014	4	4	Naoyaminit	4	Lore Aporengereng	1	8	1	14.4	21.6	127	-1.28533	-0.155192	21.6	2.46555	0	0	0	0	0	0	0	0	0	0		1	0	0		0
NA_004_020	4	4	Naoyaminit	4	Lore Alouro	1	11	0	17.8	28.4	141	-1.34853	-0.452426	28.4	2.8014	0	0	0	0	0	0	0	0	0	0		1	1	0		0
NA_004_023	4	4	Naoyaminit	4	Lore Apanyengor	1	8	0	16	20.5	122	-1.57391	-0.975685	20.5	1.82422	0	0	0	0	0	0	0	0	0	0		1	0	0		0
NA_004_024	4	4	Naoyaminit	4	Lore Apanyengor	1	12	0	22.6	48.7	159	0.965214	1.29756	48.7	4.3111	0	0	0	0	0	0	0	0	0	0		1	0	0		0
NA_004_025	4	4	Naoyaminit	4	Lore Apalowal	1	10	0	21.9	36	153	0.574267	2.29157	36	3.7902	0	0	0	0	0	0	0	0	0	0		1	0	0		0
NA_004_027	4	4	Naoyaminit	4	Lore Apalowal	1	10	0	15.1	17.6	130	-4.21124	-1.32587	17.6	0.315727	2	0	0	0	0	0	0	0	0	0		1	0	0		0
NA_004_030	4	4	Naoyaminit	4	Lore Aporengereng	1	13	0	20.5	39.3	163	-0.83492	1.11422	39.3	3.69799	0	0	0	0	0	0	0	0	0	0		1	0	0		0
NA_004_034	4	4	Naoyaminit	4	Lore Alouro	1	8	0	18	25.4	127	-0.118002	-0.0621217	25.4	2.97687	0	0	0	0	0	0	0	0	0	0		1	0	0		0
NA_004_039	4	4	Naoyaminit	4	Lore Alouro	1	10	0	19.6	32.7	146	0.0662602	1.19061	32.7	3.49315	0	0	1	0	0	0	0	0	0	1	black hairy spot on the face	1	0	0		0
NA_004_045	4	4	Naoyaminit	4	Lore Kebutur	1	10	0	20	32.5	140	0.0326263	0.246931	32.5	3.47287	0	0	0	0	0	0	0	0	0	0		1	1	0		0
NA_004_050	4	4	Naoyaminit	4	Lore Alouro	1	11	1	15.9	28.2	133	-1.32971	-1.55951	28.2	2.9516	0	0	0	0	0	0	0	0	0	0		1	0	0		0
NA_004_052	4	4	Naoyaminit	4	Lore Alomerimanik	1	9	0	16	25.3	137	-0.809989	0.715415	25.3	2.7037	0	0	0	0	0	0	0	0	0	0		1	0	0		0
NA_004_054	4	4	Naoyaminit	4	Lore Alouro	1	10	1	16.5	26	132	-1.27061	-1.03343	26	2.83852	0	0	0	0	0	0	0	0	0	0		1	0	0		0
NA_004_055	4	4	Naoyaminit	4	Lore Kebutur	1	10	0	17.3	23.7	131	-1.917	-1.16859	23.7	2.16812	0	0	0	0	0	0	0	0	0	0		1	0	0		0
NA_004_057	4	4	Naoyaminit	4	Lore Alouro	1	14	0	22	41.4	152	-1.20931	-1.1629	41.4	3.78931	0	0	0	0	0	0	0	0	0	0		1	1	0		0
NA_004_058	4	4	Naoyaminit	4	Lore Kebutur	1	8	0	18.7	29.2	135	0.705154	1.39958	29.2	3.56687	0	0	1	0	1	0	0	0	0	0		1	1	0		0
NA_004_060	4	4	Naoyaminit	4	Lore Aporengereng	1	8	1	14.2	18.6	118	-2.60485	-1.7984	18.6	1.47321	1	0	0	0	0	0	0	0	0	0		1	1	0		0
NA_004_065	4	4	Naoyaminit	4	Lore Apalowal	1	8	1	15.3	21.7	127	-1.24765	-0.155192	21.7	2.49211	0	0	0	0	0	0	0	0	0	0		1	1	0		0
NA_004_070	4	4	Naoyaminit	4	Lore Apalowal	1	8	0	14	16.6	115	-3.26923	-2.25467	16.6	0.313986	2	1	0	0	0	0	0	0	0	0		1	0	0		0
NA_004_073	4	4	Naoyaminit	4	Lore Apalowal	1	11	0	19.3	31.4	142	-0.75602	-0.307418	31.4	3.18844	0	0	0	0	0	0	0	0	0	0		1	1	0		0
NA_004_079	4	4	Naoyaminit	4	Lore Apalowal	1	8	0	15.3	20.7	123	-1.5025	-0.792973	20.7	1.88393	0	0	1	0	1	0	0	0	0	0		1	0	0		0
NA_004_080	4	4	Naoyaminit	4	Lore Apalowal	1	8	1	16	22.1	126	-1.10032	-0.33777	22.1	2.595	0	0	0	0	0	0	0	0	0	0		1	0	0		0
NA_004_082	4	4	Naoyaminit	4	Lore Alomerimanik	1	8	1	16.2	23.4	123	-0.656391	-0.885506	23.4	2.89575	0	0	0	0	0	0	0	0	0	0		1	1	0		0
NA_004_083	4	4	Naoyaminit	4	Lore Kebutur	1	8	0	15.3	23	133	-0.761719	1.03415	23	2.48413	0	0	1	0	1	0	0	0	0	0		1	1	0		0
NA_004_101	4	4	Naoyaminit	4	Lore Alouro	1	14	1	21.6	53.9	165	0.492171	0.318203	53.9	4.20187	0	0	0	0	0	0	0	0	0	0		1	0	0		0
NA_005_001	4	2	Nachuka	5	Lore Kaapuun	1	10	1	16.8	27.2	144	-0.939953	0.907288	27.2	3.0079	0	0	0	0	0	0	0	0	0	0		1	0	0		0
NA_005_006	4	2	Nachuka	5	Lore Kaapuun	1	12	0	17.2	28	142	-2.09226	-1.08972	28	2.57632	1	0	0	0	0	0	0	0	0	0		1	0	0	2	0
NA_005_007	4	2	Nachuka	5	Lore Koopuwa	1	8	0	19	27.2	136	0.297559	1.58229	27.2	3.28043	0	0	0	0	0	0	0	0	0	0		1	0	0		0
NA_005_008	4	2	Nachuka	5	Lore Koopuwa	1	13	1	20.4	37.5	153	-0.780653	-0.225658	37.5	3.54815	0	0	0	0	0	0	0	0	0	0		1	0	0		0
NA_005_019	4	2	Nachuka	5	Lore Alotee	1	13	1	18.9	32.4	142	-1.69275	-1.62805	32.4	3.15028	0	0	0	0	0	0	0	0	0	0		1	0	0		0
NA_005_022	4	2	Nachuka	5	Lore Alotee	1	9	0	17.2	27	134	-0.401455	0.201958	27	2.98949	0	0	0	0	0	0	0	0	0	0		1	0	0		0
NA_005_023	4	2	Nachuka	5	Lore Alotee	1	8	0	15.1	19.1	113	-2.11105	-2.6201	19.1	1.36489	1	1	0	0	0	0	0	0	0	0		1	0	0		0
NA_005_024	4	2	Nachuka	5	Lore Alotee	1	8	1	16.9	22.4	120	-0.993293	-1.43324	22.4	2.66878	0	0	0	0	0	0	0	0	0	0		1	0	0		0
NA_005_027	4	2	Nachuka	5	Lore Alotee	1	11	0	19.6	34.1	143	-0.295181	-0.162409	34.1	3.47011	0	0	0	0	0	0	0	0	0	0		1	0	0		0
NA_005_033	4	2	Nachuka	5	Lore Koopuwa	1	10	0	18.4	25.3	124	-1.47623	-2.26955	25.3	2.48508	0	1	0	0	0	0	0	0	0	0		1	1	0		0
NA_005_038	4	2	Nachuka	5	Lore Koopuwa	1	12	1	17.8	30.8	146	-1.32197	-0.32812	30.8	3.10065	0	0	0	0	0	0	0	0	0	0		1	0	0		0
NA_005_041	4	2	Nachuka	5	Lore Kaapuun	1	8	0	18.1	24	122	-0.479515	-0.975685	24	2.70349	0	0	0	0	0	0	0	0	0	0		1	0	0		0
NA_005_043	4	2	Nachuka	5	Lore Koopuwa	1	10	0	17.4	29	140	-0.620027	0.246931	29	3.06421	0	0	0	0	0	0	0	0	0	0		1	0	0		0
NA_005_044	4	2	Nachuka	5	Lore Alotee	1	8	1	15.4	20.8	124	-1.5999	-0.702927	20.8	2.23995	0	0	0	0	0	0	0	0	0	0		1	0	0		0
NA_005_045	4	2	Nachuka	5	Lore Alotee	1	8	0	14.2	18.1	115	-2.53994	-2.25467	18.1	0.985272	1	1	0	0	0	0	0	0	0	0		1	0	0		0
NA_005_049	4	2	Nachuka	5	Lore Alotee	1	12	0	20.4	33.6	149	-1.00601	-0.106724	33.6	3.29013	0	0	1	0	0	0	0	0	1	0		1	0	0		0
NA_005_055	4	2	Nachuka	5	Lore Koopuwa	1	14	0	20.8	45.6	169	-0.58545	1.4349	45.6	4.0607	0	0	0	0	0	0	0	0	0	0		1	0	0		0
NA_005_057	4	2	Nachuka	5	Lore Alotee	1	14	0	21	36.3	150	-2.08605	-1.46852	36.3	3.36274	1	0	0	0	0	0	0	0	0	0		1	1	0		0
NA_005_059	4	2	Nachuka	5	Lore Kaapuun	1	14	0	22.7	44.2	147	-0.784911	-1.92695	44.2	3.97671	0	0	0	0	0	0	0	0	0	0		1	0	0		0
NA_006_001	4	2	Akwapuwa Loluk	6	Lore Alotimong	1	12	1	17.8	31.1	149	-1.25654	0.0889816	31.1	3.1307	0	0	0	0	0	0	0	0	0	0		1	1	0		0
NA_006_002	4	2	Akwapuwa Loluk	6	Lore Apakarengit	1	11	1	17.5	31	143	-0.678553	-0.0556425	31	3.2529	0	0	0	0	0	0	0	0	0	0		1	0	0		0
NA_006_011	4	2	Akwapuwa Loluk	6	Lore Alotimong	1	14	1	21.1	44.5	160	-0.549304	-0.284454	44.5	3.88157	0	0	0	0	0	0	0	0	0	0		1	0	0		0
NA_006_012	4	2	Akwapuwa Loluk	6	Lore Alotimong	1	13	1	18.4	36.2	155	-0.993537	0.0293222	36.2	3.46123	0	0	1	0	0	0	0	0	1	0		1	0	0		0
NA_006_014	4	2	Akwapuwa Loluk	6	Lore Alotimong	1	8	0	18.5	26.7	141	0.187158	2.49586	26.7	3.20091	0	0	0	0	0	0	0	0	0	0		1	0	0		0
NA_006_017	4	2	Akwapuwa Loluk	6	Lore Alotimong	1	8	0	15.6	19.2	120	-2.07037	-1.34111	19.2	1.40031	1	0	0	0	0	0	0	0	0	0		1	1	0		0
NA_006_023	4	2	Akwapuwa Loluk	6	Lore Apakarengit	1	8	0	16.1	20.1	115	-1.72055	-2.25467	20.1	1.70062	0	1	1	0	0	1	0	0	0	1	Skin rash	1	0	0		0
NA_006_028	4	2	Akwapuwa Loluk	6	Lore Apakarengit	1	11	0	17.5	27.6	147	-1.52372	0.417626	27.6	2.68155	0	0	0	0	0	0	0	0	0	0		1	1	0		0
NA_006_034	4	2	Akwapuwa Loluk	6	Lore Alotimong	1	9	0	16.7	26.7	141	-0.47017	1.40002	26.7	2.94215	0	0	0	0	0	0	0	0	0	0		1	1	0		0
NA_006_035	4	2	Akwapuwa Loluk	6	Lore Alotimong	1	9	0	18.1	29.5	144	0.122342	1.91348	29.5	3.34046	0	0	0	0	0	0	0	0	0	0		1	0	0		0
NA_006_042	4	2	Akwapuwa Loluk	6	Lore Alotimong	1	11	1	16.3	29.3	143	-1.05892	-0.0556425	29.3	3.07973	0	0	0	0	0	0	0	0	0	0		1	1	0		0
NA_006_053	4	2	Akwapuwa Loluk	6	Lore Alotimong	1	8	0	14.1	16.7	115	-3.21697	-2.25467	16.7	0.363154	2	1	1	0	0	0	0	0	0	1	Wounds	1	1	0		0
NA_006_065	4	2	Akwapuwa Loluk	6	Lore Apakarengit	1	8	0	13.9	17.6	116	-2.77067	-2.07196	17.6	0.776384	1	1	0	0	0	0	0	0	0	0		1	1	0		0
NA_007_010	4	2	Angarab	7	Lore Kaabura	1	10	0	17.6	20.5	120	-2.97359	-2.89867	20.5	1.35694	1	1	0	0	0	0	0	0	0	0		1	1	0		0
NA_007_023	4	2	Angarab	7	Lore Kaabura	1	8	0	13.9	15.9	114	-3.65143	-2.43739	15.9	-0.0505959	2	1	0	0	0	0	0	0	0	0		1	1	0		0
NA_007_028	4	2	Angarab	7	Lore Aloyor	1	8	1	13.7	18.8	120	-2.50375	-1.43324	18.8	1.55349	1	0	0	0	0	0	0	0	0	0		1	1	0		0
NA_008_008	4	5	Naronit	8	Lore Akodet	1	9	0	14.8	20.1	128	-2.43492	-0.824955	20.1	1.46553	1	0	0	0	0	0	0	0	0	0		1	0	0		0
NA_008_010	4	5	Naronit	8	Lore Ateko	1	10	0	18.1	29.2	134	-0.579114	-0.696749	29.2	3.09066	0	0	0	0	0	0	0	0	0	0		1	0	0		0
NA_008_013	4	5	Naronit	8	Lore Abule	1	13	1	19.4	37.2	154	-0.828723	-0.0981679	37.2	3.52883	0	0	0	0	0	0	0	0	0	0		1	0	0		0
NA_008_014	4	5	Naronit	8	Lore Alokawa	1	14	0	26.3	50	160	-0.00644738	0.0595964	50	4.29038	0	0	0	0	0	0	0	0	0	0		1	1	0		0
NA_008_016	4	5	Naronit	8	Lore Kaapuru	1	12	0	21.2	35.8	149	-0.647148	-0.106724	35.8	3.50129	0	0	0	0	0	0	0	0	0	0		1	1	0		0
NA_008_021	4	5	Naronit	8	Lore Alokawa	1	9	1	16.2	21.6	131	-2.05166	-0.39317	21.6	2.20291	1	0	1	0	1	0	0	0	0	0		1	1	0		0
NA_008_023	4	5	Naronit	8	Lore Kaapuru	1	8	0	17.8	22.4	120	-0.941824	-1.34111	22.4	2.34144	0	0	1	0	1	0	0	0	0	0		1	1	0		0
NA_008_033	4	5	Naronit	8	Lore Akodet	1	12	1	18.5	28.7	137	-1.81535	-1.57942	28.7	2.86521	0	0	1	0	0	0	0	0	0	1	skin rashes	1	0	0		0
NA_008_044	4	5	Naronit	8	Lore Ateko	1	12	1	19.4	38.4	159	0.0409418	1.47932	38.4	3.66985	0	0	0	0	0	0	0	0	0	0		1	0	0		0
NA_008_045	4	5	Naronit	8	Lore Akodet	1	14	1	21.5	44.3	162	-0.574637	-0.0433914	44.3	3.87272	0	0	0	0	0	0	0	0	0	0		1	0	0		0
NA_008_048	4	5	Naronit	8	Lore Alokawa	1	11	0	17.4	27.4	140	-1.56879	-0.597435	27.4	2.65032	0	0	0	0	0	0	0	0	0	0		1	0	0		0
NA_008_049	4	5	Naronit	8	Lore Alokawa	1	9	0	15.3	22.7	139	-1.53935	1.05772	22.7	2.16776	0	0	0	0	0	0	0	0	0	0		1	0	0		0
NA_008_051	4	5	Naronit	8	Lore Ateko	1	8	0	18.9	23.7	120	-0.561938	-1.34111	23.7	2.63996	0	0	0	0	0	0	0	0	0	0		1	1	0		0
NA_008_052	4	5	Naronit	8	Lore Ateko	1	10	0	18.7	25.3	129	-1.47623	-1.48315	25.3	2.48508	0	0	0	0	0	0	0	0	0	0		1	0	0		0
NA_008_056	4	5	Naronit	8	Lore Abule	1	12	0	19.5	32.6	146	-1.18035	-0.528008	32.6	3.18323	0	0	0	0	0	0	0	0	0	0		1	0	0		0
NA_008_057	4	5	Naronit	8	Lore Ateko	1	9	0	19.5	31	144	0.400188	1.91348	31	3.51949	0	0	0	0	0	0	0	0	0	0		1	0	0		0
NA_008_059	4	5	Naronit	8	Lore Ateko	1	11	1	17.2	29.4	144	-1.03532	0.0947447	29.4	3.09071	0	0	0	0	0	0	0	0	0	0		1	0	0		0
NA_008_061	4	5	Naronit	8	Lore Abule	1	13	1	19.4	38.5	158	-0.624763	0.411793	38.5	3.60958	0	0	0	0	0	0	0	0	0	0		1	0	0		0
NA_009_002	4	7	Longaroi	9	Lore Akanyangareng	1	14	1	20.6	43	162	-0.74315	-0.0433914	43	3.81245	0	0	0	0	0	0	0	0	0	0		1	1	0		0
NA_009_006	4	7	Longaroi	9	Lore Angakimak	1	12	1	17.5	27.8	136	-2.04786	-1.71846	27.8	2.7488	1	0	0	0	0	0	0	0	0	0		1	0	0		0
NA_009_008	4	7	Longaroi	9	Lore Adengel	1	14	1	19.6	35.6	152	-1.85363	-1.2487	35.6	3.35048	0	0	0	0	0	0	0	0	0	0		1	1	0		0
NA_009_010	4	7	Longaroi	9	Lore Kaalbert	1	11	1	16.4	25.3	138	-2.15759	-0.807579	25.3	2.53517	1	0	0	0	0	0	0	0	0	0		1	0	0		0
NA_009_013	4	7	Longaroi	9	Lore Alogir	1	9	1	17.5	26.1	136	-0.567372	0.469046	26.1	3.08751	0	0	0	0	0	0	0	0	0	0		1	1	0		0
NA_009_014	4	7	Longaroi	9	Lore Angimiroo	1	12	1	18.3	33.6	148	-0.75349	-0.0500523	33.6	3.35248	0	0	0	0	0	0	0	0	0	0		1	0	0		0
NA_009_017	4	7	Longaroi	9	Lore Kookudet	1	13	1	20.4	37.3	155	-0.812631	0.0293222	37.3	3.53532	0	0	0	0	0	0	0	0	0	0		1	0	0		0
NA_009_023	4	7	Longaroi	9	Lore Alogir	1	12	1	17.8	31.3	152	-1.21356	0.506083	31.3	3.15028	0	0	0	0	0	0	0	0	0	0		1	0	0		0
NA_009_024	4	7	Longaroi	9	Lore Angimiroo	1	13	0	19.8	34.4	152	-1.64133	-0.4734	34.4	3.26172	0	0	1	0	0	0	0	0	0	1	Wounds	1	0	0		0
NA_009_026	4	7	Longaroi	9	Lore Angimiroo	1	8	0	18	23	123	-0.761719	-0.792973	23	2.48413	0	0	0	0	0	0	0	0	0	0		1	0	0		0
NA_009_027	4	7	Longaroi	9	Not applicable	0	8	0	18.5	24.5	127	-0.346163	-0.0621217	24.5	2.80533	0	0	0	0	0	0	0	0	0	0		2	0	0		0
NA_009_029	4	7	Longaroi	9	Lore Angimiroo	1	8	0	15.3	20.5	121	-1.57391	-1.1584	20.5	1.82422	0	0	1	0	1	0	0	0	0	0		1	0	0		0
NA_009_037	4	7	Longaroi	9	Lore Kaachuka	1	13	0	20.4	40.7	161	-0.627913	0.825565	40.7	3.80084	0	0	0	0	0	0	0	0	0	0		1	0	0		0
NA_009_038	4	7	Longaroi	9	Lore Kookudet	1	9	0	17.5	23.2	125	-1.38778	-1.33841	23.2	2.28182	0	0	0	0	0	0	0	0	0	0		1	0	0		0
NA_009_039	4	7	Longaroi	9	Lore Akanyangareng	1	13	1	19.4	31.8	142	-1.81525	-1.62805	31.8	3.09166	0	0	0	0	0	0	0	0	0	0		1	1	0		0
NA_009_040	4	7	Longaroi	9	Lore Angimiroo	1	13	0	17.2	28.4	147	-2.85628	-1.19505	28.4	2.48756	1	0	0	0	0	0	0	0	0	0		1	0	0		0
NA_009_041	4	7	Longaroi	9	Lore Akanyangareng	1	13	1	19.6	31	137	-1.98444	-2.2655	31	3.00862	0	1	0	0	0	0	0	0	0	0		1	0	0		0
NA_009_049	4	7	Longaroi	9	Lore Kaachuka	1	14	1	20.5	43.5	165	-0.677533	0.318203	43.5	3.83621	0	0	0	0	0	0	0	0	0	0		1	0	0		0
NA_009_050	4	7	Longaroi	9	Lore Keemorok	1	8	1	17.6	19.5	119	-2.16626	-1.61582	19.5	1.8164	1	0	0	0	0	0	0	0	0	0		1	0	0		0
NA_009_051	4	7	Longaroi	9	Lore Aloteng	1	12	0	18.2	27.2	139	-2.27272	-1.511	27.2	2.44639	1	0	0	0	0	0	0	0	0	0		1	1	0		0
NA_009_055	4	7	Longaroi	9	Lore Apathiya	1	14	0	25	48.7	156	-0.170492	-0.55165	48.7	4.2274	0	0	0	0	0	0	0	0	0	0		1	0	0		0
NA_009_056	4	7	Longaroi	9	Lore Aloteng	1	14	0	21.4	43	158	-0.962446	-0.246027	43	3.89977	0	0	0	0	0	0	0	0	0	0		1	0	0		0
NA_009_060	4	7	Longaroi	9	Lore Akanyangareng	1	9	1	15.4	21.4	130	-2.13283	-0.565613	21.4	2.15091	1	0	0	0	0	0	0	0	0	0		1	0	0		0
NA_009_061	4	7	Longaroi	9	Lore Angimiroo	1	9	1	17.1	25.1	133	-0.849188	-0.0482839	25.1	2.9294	0	0	0	0	0	0	0	0	0	0		1	0	0		0
NA_009_067	4	7	Longaroi	9	Lore Kaamunyinakori	1	10	0	15.8	27	143	-1.05771	0.718771	27	2.77422	0	0	0	0	0	0	0	0	0	0		1	0	0		0
NA_009_072	4	7	Longaroi	9	Lore Angimiroo	1	10	1	18	27.4	137	-0.887793	-0.2248	27.4	3.03408	0	0	0	0	0	0	0	0	0	0		1	0	0		0
NA_009_074	4	7	Longaroi	9	Lore Angimiroo	1	10	0	19.6	30.1	137	-0.400826	-0.224909	30.1	3.20465	0	0	0	0	0	0	0	0	0	0		1	0	0		0
NA_009_076	4	7	Longaroi	9	Lore Kaamunyinakori	1	13	0	19.5	34.5	148	-1.62343	-1.05072	34.5	3.27204	0	0	0	0	0	0	0	0	0	0		1	0	0		0
NA_009_081	4	7	Longaroi	9	Lore Kaamunyinakori	1	8	0	13.6	17.9	117	-2.63085	-1.88925	17.9	0.903357	1	0	1	0	1	0	0	0	0	0		1	0	0		0
NA_010_001	4	5	Loolim	10	Not applicable	0	9	1	20.5	33.1	148	0.910284	2.53836	33.1	3.83742	0	0	0	0	0	0	0	0	0	0		1	0	0		0
NA_010_003	4	5	Loolim	10	Lore Apalomwae	1	11	0	19.1	34	153	-0.311201	1.28768	34	3.4606	0	0	0	0	0	0	0	0	0	0		1	0	0		0
NA_010_005	4	5	Loolim	10	Not applicable	0	11	1	17.2	28.3	140	-1.30422	-0.506804	28.3	2.96383	0	0	0	0	0	0	0	0	0	0		1	1	0		0
NA_010_006	4	5	Loolim	10	Not applicable	0	13	0	19.7	30.6	134	-2.37554	-3.07133	30.6	2.81169	1	2	0	0	0	0	0	0	0	0		1	0	0		0
NA_010_013	4	5	Loolim	10	Not applicable	0	8	1	17	26.9	135	0.325067	1.30544	26.9	3.51054	0	0	0	0	0	0	0	0	0	0		1	0	0		0
NA_010_015	4	5	Loolim	10	Not applicable	0	10	0	17.2	30.1	139	-0.400826	0.0896507	30.1	3.20465	0	0	0	0	0	0	0	0	0	0		1	0	0		0
NA_010_016	4	5	Loolim	10	Not applicable	0	12	0	19	30.9	141	-1.49484	-1.23015	30.9	2.98311	0	0	0	0	0	0	0	0	0	0		1	0	0		0
NA_010_017	4	5	Loolim	10	Lore Alokoi	1	11	0	17.2	26.7	139	-1.73077	-0.742443	26.7	2.5367	0	0	0	0	0	0	0	0	0	0		1	0	0		0
NA_010_019	4	5	Loolim	10	Not applicable	0	9	0	15.6	22.5	131	-1.60165	-0.311498	22.5	2.12046	0	0	0	0	0	0	0	0	0	0		1	0	0		0
NA_010_023	4	5	Loolim	10	Not applicable	0	14	1	16	31.6	149	-2.59333	-1.6103	31.6	2.97281	1	0	0	0	0	0	0	0	0	0		1	0	0		0
NA_010_024	4	5	Loolim	10	Lore Apalomwae	1	12	0	15.2	21.7	131	-3.75657	-2.63443	21.7	1.24683	2	1	0	0	0	0	0	0	0	0		1	0	0		0
NA_010_027	4	5	Loolim	10	Not applicable	0	13	1	20.2	42.3	159	-0.0868835	0.539283	42.3	3.80753	0	0	0	0	0	0	0	0	0	0		1	0	0		0
NA_010_029	4	5	Loolim	10	Not applicable	0	13	1	18	31.1	144	-1.96291	-1.37307	31.1	3.01932	0	0	0	0	0	0	0	0	0	0		1	1	0		0
NA_010_031	4	5	Loolim	10	Not applicable	0	10	0	17	23.9	125	-1.85913	-2.11227	23.9	2.21046	0	1	0	0	0	0	0	0	0	0		1	1	0		0
NA_010_032	4	5	Loolim	10	Not applicable	0	14	1	17.7	33.6	152	-2.2086	-1.2487	33.6	3.17679	1	0	0	0	0	0	0	0	0	0		1	0	0		0
NA_010_033	4	5	Loolim	10	Not applicable	0	9	0	16.5	24.7	126	-0.966112	-1.16726	24.7	2.59174	0	0	0	0	0	0	0	0	0	0		1	0	0		0
NA_010_035	4	5	Loolim	10	Not applicable	0	8	0	16.4	24.7	132	-0.294176	0.851442	24.7	2.84472	0	0	0	0	0	0	0	0	0	0		1	0	0		0
NA_010_036	4	5	Loolim	10	Not applicable	0	11	0	16.4	25.8	141	-1.94926	-0.452426	25.8	2.38005	0	0	0	0	0	0	0	0	0	0		1	0	0		0
NA_010_037	4	5	Loolim	10	Not applicable	0	13	1	17	30.4	144	-2.11599	-1.37307	30.4	2.94236	1	0	0	0	0	0	0	0	0	0		1	1	0		0
NA_010_039	4	5	Loolim	10	Not applicable	0	11	0	19.2	25.8	133	-1.94926	-1.6125	25.8	2.38005	0	0	0	0	0	0	0	0	0	0		1	0	0		0
NA_010_041	4	5	Loolim	10	Not applicable	0	8	0	16.2	20	127	-1.75802	-0.0621217	20	1.66882	0	0	0	0	0	0	0	0	0	0		1	0	0		0
NA_010_043	4	5	Loolim	10	Not applicable	0	11	0	16.5	22.1	130	-2.9933	-2.04752	22.1	1.57739	1	1	0	0	0	0	0	0	0	0		1	0	0		0
NA_010_045	4	5	Loolim	10	Not applicable	0	12	0	18.1	32.2	145	-1.25222	-0.668436	32.2	3.13833	0	0	0	0	0	0	0	0	0	0		1	0	0		0
NA_010_046	4	5	Loolim	10	Lore Alokoi	1	10	1	14.4	21.6	131	-2.81494	-1.19516	21.6	1.97243	1	0	0	0	0	0	0	0	0	0		1	0	0		0
NA_010_047	4	5	Loolim	10	Not applicable	0	8	0	18.5	23.1	120	-0.732517	-1.34111	23.1	2.50707	0	0	0	0	0	0	0	0	0	0		1	0	0		0
NA_010_048	4	5	Loolim	10	Lore Apalomwae	1	11	1	16.4	25.7	135	-2.03219	-1.25874	25.7	2.60062	1	0	1	0	0	0	0	0	0	1	wounds	1	0	0		0
NA_010_049	4	5	Loolim	10	Lore Alokoi	1	13	0	23	45.8	158	0.0554327	0.392576	45.8	4.1156	0	0	1	0	1	0	0	0	1	0		1	0	0		0
NA_010_050	4	5	Loolim	10	Not applicable	0	13	0	22.7	45.3	153	-0.00715436	-0.329071	45.3	4.08829	0	0	0	0	0	0	0	0	0	0		1	0	0		0
NA_010_051	4	5	Loolim	10	Not applicable	0	12	1	16.3	26.8	139	-2.32312	-1.30136	26.8	2.60642	1	0	1	0	1	0	0	0	0	1	wounds	1	0	0		0
NA_010_052	4	5	Loolim	10	Not applicable	0	11	0	20.5	34.7	148	-0.20061	0.562634	34.7	3.52583	0	0	0	0	0	0	0	0	0	0		1	0	0		0
NA_010_055	4	5	Loolim	10	Lore Apalomwae	1	10	1	16.6	25.5	134	-1.41803	-0.709981	25.5	2.76115	0	0	0	0	0	0	0	0	0	0		1	0	0		0
NA_010_058	4	5	Loolim	10	Not applicable	0	8	0	14.5	19.5	115	-1.95055	-2.25467	19.5	1.50403	0	1	0	0	0	0	0	0	0	0		1	1	0		0
NA_010_059	4	5	Loolim	10	Not applicable	0	8	0	15	19.5	119	-1.95055	-1.52382	19.5	1.50403	0	0	0	0	0	0	0	0	0	0		1	0	0		0
NA_010_060	4	5	Loolim	10	Not applicable	0	13	0	18.5	33.1	147	-1.8803	-1.19505	33.1	3.121	0	0	0	0	0	0	0	0	0	0		1	0	0		0
NA_010_062	4	5	Loolim	10	Not applicable	0	12	0	18.8	38.3	159	-0.275503	1.29756	38.3	3.70768	0	0	0	0	0	0	0	0	0	0		1	0	0		0
NA_010_063	4	5	Loolim	10	Lore Alokoi	1	9	1	13.6	20	123	-2.74869	-1.77272	20	1.74444	1	0	0	0	0	0	0	0	0	0		1	0	0		0
NA_010_064	4	5	Loolim	10	Lore Apalomwae	1	14	1	19.5	43.7	168	-0.65157	0.679797	43.7	3.84551	0	0	0	0	0	0	0	0	0	0		1	0	0		0
NA_010_065	4	5	Loolim	10	Not applicable	0	13	0	23.6	55	156	1.07115	0.103917	55	4.51857	0	0	0	0	0	0	0	0	0	0		1	0	0		0
NA_010_069	4	5	Loolim	10	Not applicable	0	13	0	20.5	41.4	157	-0.5278	0.248247	41.4	3.8493	0	0	0	0	0	0	0	0	0	0		1	0	0		0
NA_010_070	4	5	Loolim	10	Not applicable	0	13	0	19	37.8	157	-1.06746	0.248247	37.8	3.5781	0	0	0	0	0	0	0	0	0	0		1	0	0		0
NA_010_073	4	5	Loolim	10	Not applicable	0	11	1	17.2	33.4	150	-0.208032	0.997068	33.4	3.45597	0	0	0	0	0	0	0	0	0	0		1	0	0		0
NA_010_074	4	5	Loolim	10	Lore Alokoi	1	14	1	18.5	33	155	-2.3207	-0.887111	33	3.11909	1	0	0	0	0	0	0	0	0	0		1	0	0		0
NA_010_076	4	5	Loolim	10	Not applicable	0	12	0	17.1	24.2	139	-3.02284	-1.511	24.2	1.86988	2	0	0	0	0	0	0	0	0	0		1	0	0		0
NA_010_077	4	5	Loolim	10	Not applicable	0	11	0	16.5	22.6	132	-2.83638	-1.7575	22.6	1.70379	1	0	0	0	0	0	0	0	0	0		1	0	0		0
NA_010_078	4	5	Loolim	10	Not applicable	0	11	0	16.5	26.1	135	-1.8751	-1.32248	26.1	2.43366	0	0	0	0	0	0	0	0	0	0		1	0	0		0
NA_010_079	4	5	Loolim	10	Not applicable	0	9	0	16.7	20.3	123	-2.35879	-1.68072	20.3	1.52709	1	0	0	0	0	0	0	0	0	0		1	0	1	5	0
NA_010_080	4	5	Loolim	10	Not applicable	0	12	0	18.1	32.8	151	-1.14488	0.174131	32.8	3.20521	0	0	0	0	0	0	0	0	0	0		1	0	0		0
NA_010_083	4	5	Loolim	10	Lore Apalomwae	1	14	1	19.5	39	161	-1.30808	-0.163923	39	3.59209	0	0	0	0	0	0	0	0	0	0		1	0	0		0
NA_010_086	4	5	Loolim	10	Lore Alokoi	1	10	0	15.3	18.1	118	-3.97356	-3.21323	18.1	0.523233	2	2	0	0	0	0	0	0	0	0		1	0	0		0
NA_010_087	4	5	Loolim	10	Not applicable	0	10	0	17.3	25.8	134	-1.3482	-0.696749	25.8	2.57475	0	0	0	0	0	0	0	0	0	0		1	1	0		0
NA_010_089	4	5	Loolim	10	Not applicable	0	9	0	18.3	22.4	118	-1.63318	-2.53648	22.4	2.09644	0	1	0	0	0	0	0	0	0	0		1	1	0		0
NA_010_092	4	5	Loolim	10	Not applicable	0	11	0	17.7	24.2	131	-2.3694	-1.90251	24.2	2.06787	1	0	0	0	0	0	0	0	0	0		1	1	0		0
NA_010_097	4	5	Loolim	10	Not applicable	0	11	0	14.3	17.9	114	-4.57928	-4.36766	17.9	0.183637	2	2	0	0	0	0	0	0	0	0		1	1	0		0
NA_010_098	4	5	Loolim	10	Lore Alokoi	1	12	1	17	24.8	133	-2.93501	-2.13556	24.8	2.27219	1	1	0	0	0	0	0	0	0	0		1	0	0		0
NA_010_100	4	5	Loolim	10	Lore Apalomwae	1	12	1	20.2	31.9	144	-1.08762	-0.606188	31.9	3.20698	0	0	1	0	1	0	0	0	0	0		1	0	0		0
NA_010_101	4	5	Loolim	10	Lore Alokoi	1	10	1	15.6	22	126	-2.64772	-2.0038	22	2.07204	1	1	0	0	0	0	0	0	0	0		1	0	0		0
NA_010_110	4	5	Loolim	10	Lore Apalomwae	1	9	1	16	21	118	-2.30003	-2.63493	21	2.04263	1	1	0	0	0	0	0	0	0	0		1	0	0		0
NA_010_111	4	5	Loolim	10	Lore Apalomwae	1	8	1	15.7	21	120	-1.519	-1.43324	21	2.29862	0	0	0	0	0	0	0	0	0	0		1	0	0		0
NA_010_117	4	5	Loolim	10	Lore Apalomwae	1	13	1	19	31.1	140	-1.96291	-1.88303	31.1	3.01932	0	0	0	0	0	0	0	0	0	0		1	0	0		0
NA_011_003	4	4	Adwaramukuny	11	Lore Angikatap	1	12	0	19.3	33.7	153	-0.988985	0.454987	33.7	3.30042	0	0	0	0	0	0	0	0	0	0		1	0	0		0
NA_011_005	4	4	Adwaramukuny	11	Lore Angikatap	1	8	0	16	21.4	126	-1.26199	-0.244834	21.4	2.08264	0	0	0	0	0	0	0	0	0	0		1	0	0		0
NA_011_009	4	4	Adwaramukuny	11	Lore Angikatap	1	8	0	16.6	22.9	129	-0.79115	0.303304	22.9	2.46096	0	0	1	0	0	0	0	0	0	1	dandruff	1	0	0		0
NA_011_011	4	4	Adwaramukuny	11	Lore Angikatap	1	8	0	16.8	22.3	125	-0.972683	-0.427547	22.3	2.31678	0	0	0	0	0	0	0	0	0	0		1	0	0		0
NA_011_013	4	4	Adwaramukuny	11	Lore Angikatap	1	8	0	15.5	19.4	120	-1.99012	-1.34111	19.4	1.46987	0	0	0	0	0	0	0	0	0	0		1	0	0		0
NA_011_015	4	4	Adwaramukuny	11	Lore Angikatap	1	8	1	15.9	20.1	121	-1.89573	-1.25066	20.1	2.02148	0	0	1	0	1	0	0	0	0	0		1	1	0		0
NA_011_031	4	4	Adwaramukuny	11	Lore Alokikiya	1	8	0	16	20.7	129	-1.5025	0.303304	20.7	1.88393	0	0	0	0	0	0	0	0	0	0		1	0	0		0
NA_011_032	4	4	Adwaramukuny	11	Lore Alokikiya	1	8	0	16.7	25.2	135	-0.167444	1.39958	25.2	2.93999	0	0	0	0	0	0	0	0	0	0		1	0	0		0
NA_011_035	4	4	Adwaramukuny	11	Lore Angikatap	1	10	0	18	24.3	129	-1.74585	-1.48315	24.3	2.29271	0	0	0	0	0	0	0	0	0	0		1	0	0		0
NA_012_015	4	2	Naitakwae	12	Lore Apalotuko	1	8	0	15	20.1	119	-1.72055	-1.52382	20.1	1.70062	0	0	0	0	0	0	0	0	0	0		1	1	0		0
NA_012_016	4	2	Naitakwae	12	Lore Apalotuko	1	14	1	19	39.5	155	-1.23327	-0.887111	39.5	3.62296	0	0	0	0	0	0	0	0	0	0		1	1	0		0
NA_012_017	4	2	Naitakwae	12	Lore Apalotuko	1	14	0	20.2	46	165	-0.529901	0.823654	46	4.08364	0	0	0	0	0	0	0	0	0	0		1	0	0		0
NA_012_019	4	2	Naitakwae	12	Lore Apalotuko	1	14	0	22.2	45.3	161	-0.627524	0.212408	45.3	4.0432	0	0	0	0	0	0	0	0	0	0		1	0	0		0
NA_012_024	4	2	Naitakwae	12	Lore Apalotom	1	13	1	16.7	31.9	146	-1.79458	-1.11809	31.9	3.10164	0	0	0	0	0	0	0	0	0	0		1	0	0		0
NA_012_026	4	2	Naitakwae	12	Lore Apalotuko	1	12	1	17.6	26.5	136	-2.40944	-1.71846	26.5	2.56076	1	0	0	0	0	0	0	0	0	0		1	1	0		0
NA_012_030	4	2	Naitakwae	12	Lore Apalotuko	1	8	0	14.5	18.8	117	-2.23543	-1.88925	18.8	1.25597	1	0	0	0	0	0	0	0	0	0		1	0	0		0
NA_012_041	4	2	Naitakwae	12	Lore Apalotuko	1	12	1	19.5	33.4	152	-0.791164	0.506083	33.4	3.33643	0	0	1	0	0	0	0	0	0	1	Wounds on the legs	1	1	0		0
NA_013_043	4	4	Nakaramwae	13	Lore Alochiyo	1	10	1	20	38.9	152	1.1754	2.2011	38.9	3.9486	0	0	0	0	0	0	0	0	0	0		1	1	0		0
NA_013_051	4	4	Nakaramwae	13	Lore Alochiyo	1	13	0	20.5	38	155	-1.03578	-0.0404121	38	3.59471	0	0	0	0	0	0	0	0	0	0		1	1	0		0
NA_013_052	4	4	Nakaramwae	13	Lore Alochiyo	1	14	0	19.8	37.1	150	-1.9384	-1.46852	37.1	3.43846	0	0	0	0	0	0	0	0	0	0		1	0	0		0
NA_013_071	4	4	Nakaramwae	13	Lore Amerinyang	1	8	0	16	21.4	122	-1.26199	-0.975685	21.4	2.08264	0	0	0	0	0	0	0	0	0	0		1	1	0		0
NA_014_006	4	5	Naoi	14	Lore Keekwaputh	1	8	0	14.9	19.1	120	-2.11105	-1.34111	19.1	1.36489	1	0	0	0	0	0	0	0	0	0		1	1	0		0
NA_014_008	4	5	Naoi	14	Lore Aichongat	1	10	1	17.4	31.2	142	-0.0294172	0.583834	31.2	3.44377	0	0	0	0	0	0	0	0	0	0		1	1	0		0
NA_014_010	4	5	Naoi	14	Lore Keekwaputh	1	8	1	17.4	28.7	134	0.736393	1.12286	28.7	3.74733	0	0	1	0	1	0	0	0	0	0		1	0	0		0
NA_014_014	4	5	Naoi	14	Lore Keekwaputh	1	9	0	15.1	18.4	111	-3.14128	-3.73454	18.4	0.878139	2	2	1	0	1	0	0	0	0	0		1	0	0		0
NA_014_015	4	5	Naoi	14	Lore Keekwaputh	1	8	0	16.7	21.8	123	-1.13077	-0.792973	21.8	2.1895	0	0	1	0	1	0	0	0	0	0		1	0	0		0
NA_014_019	4	5	Naoi	14	Lore Keekwaputh	1	10	1	15.7	23	128	-2.2563	-1.68034	23	2.29974	1	0	0	0	0	0	0	0	0	0		1	0	0		0
NA_014_022	4	5	Naoi	14	Lore Keekwaputh	1	10	1	15.8	25.9	135	-1.29962	-0.548254	25.9	2.82339	0	0	1	0	1	0	0	0	0	0		1	0	0		0
NA_014_029	4	5	Naoi	14	Lore Aichongat	1	10	0	17.9	21.5	116	-2.61433	-3.52779	21.5	1.64085	1	2	1	0	0	0	0	0	1	0		1	0	0		0
NA_014_031	4	5	Naoi	14	Lore Keekwaputh	1	9	0	14	17.4	119	-3.61392	-2.36532	17.4	0.468919	2	1	0	0	0	0	0	0	0	0		1	0	0		0
NA_014_032	4	5	Naoi	14	Lore Aichongat	1	8	0	17.1	23.7	127	-0.561938	-0.0621217	23.7	2.63996	0	0	0	0	0	0	0	0	0	0		1	0	0		0
NA_014_033	4	5	Naoi	14	Lore Keekwaputh	1	11	1	16	22.6	131	-3.12128	-1.86029	22.6	2.00439	2	0	0	0	0	0	0	0	0	0		1	0	0		0
NA_014_035	4	5	Naoi	14	Lore Aichongat	1	13	1	19	34.9	146	-1.21901	-1.11809	34.9	3.36527	0	0	1	0	0	0	0	0	1	0		1	0	0		0
NA_014_041	4	5	Naoi	14	Lore Keekwaputh	1	12	0	14.5	22.3	133	-3.56989	-2.35357	22.3	1.41106	2	1	0	0	0	0	0	0	0	0		1	0	0		0
NA_014_044	4	5	Naoi	14	Lore Aichongat	1	14	0	24	53.6	164	0.420646	0.670842	53.6	4.4469	0	0	0	0	0	0	0	0	0	0		1	0	0		0
NA_014_045	4	5	Naoi	14	Lore Keekwaputh	1	10	0	16.5	27.2	141	-1.01145	0.404211	27.2	2.80547	0	0	0	0	0	0	0	0	0	0		1	0	0		0
NA_014_046	4	5	Naoi	14	Lore Keekwaputh	1	12	1	17	34.4	153	-0.606858	0.645117	34.4	3.41408	0	0	0	0	0	0	0	0	0	0		1	1	0		0
NA_014_047	4	5	Naoi	14	Lore Keekwaputh	1	11	0	19.5	37.1	151	0.153003	0.99766	37.1	3.72797	0	0	0	0	0	0	0	0	0	0		1	0	0		0
NA_014_049	4	5	Naoi	14	Lore Aichongat	1	12	0	19.8	39.1	154	-0.163768	0.595415	39.1	3.76734	0	0	0	0	0	0	0	0	0	0		1	0	0		0
NA_014_050	4	5	Naoi	14	Lore Keekwaputh	1	12	0	17	29	147	-1.87671	-0.38758	29	2.72718	0	0	0	0	0	0	0	0	0	0		1	0	0		0
NA_014_053	4	5	Naoi	14	Lore Keekwaputh	1	12	0	17.5	29	143	-1.87671	-0.949292	29	2.72718	0	0	0	0	0	0	0	0	0	0		1	0	0		0
NA_014_057	4	5	Naoi	14	Lore Keekwaputh	1	8	0	15.7	20.5	121	-1.57391	-1.1584	20.5	1.82422	0	0	0	0	0	0	0	0	0	0		1	0	0		0
NA_014_058	4	5	Naoi	14	Lore Keekwaputh	1	10	1	13.5	23.1	136	-2.21911	-0.386527	23.1	2.32097	1	0	0	0	0	0	0	0	0	0		1	0	0		0
NA_014_062	4	5	Naoi	14	Lore Keekwaputh	1	9	1	17.1	23	127	-1.52472	-1.08294	23	2.53148	0	0	0	0	0	0	0	0	0	0		1	0	0		0
NA_014_064	4	5	Naoi	14	Lore Aichongat	1	8	1	13.5	18.6	119	-2.60485	-1.61582	18.6	1.47321	1	0	0	0	0	0	0	0	0	0		1	0	0		0
NA_014_069	4	5	Naoi	14	Lore Keekwaputh	1	10	1	15.9	23.1	129	-2.21911	-1.51862	23.1	2.32097	1	0	0	0	0	0	0	0	0	0		1	0	0		0
NA_014_072	4	5	Naoi	14	Lore Keekwaputh	1	11	0	22	42.1	150	0.78413	0.852651	42.1	4.06455	0	0	0	0	0	0	0	0	0	0		1	1	0		0
NA_014_073	4	5	Naoi	14	Lore Keekwaputh	1	13	0	22.4	46.6	165	0.153773	1.40288	46.6	4.15789	0	0	0	0	0	0	0	0	0	0		1	1	0		0
NA_014_074	4	5	Naoi	14	Lore Aichongat	1	13	0	19.5	34.1	146	-1.69544	-1.33938	34.1	3.23033	0	0	0	0	0	0	0	0	0	0		1	1	0		0
NA_014_076	4	5	Naoi	14	Lore Keekwaputh	1	12	0	21	40.1	158	-0.0285753	1.15713	40.1	3.83808	0	0	0	0	0	0	0	0	0	0		1	1	0		0
NA_014_079	4	5	Naoi	14	Lore Keekwaputh	1	14	0	19.4	39.5	163	-1.51887	0.518031	39.5	3.64492	0	0	0	0	0	0	0	0	0	0		1	1	0		0
NA_014_081	4	5	Naoi	14	Lore Keekwaputh	1	11	0	18.3	28	140	-1.43513	-0.597435	28	2.74247	0	0	0	0	0	0	0	0	0	0		1	0	0		0
NA_014_084	4	5	Naoi	14	Lore Keekwaputh	1	9	1	14.5	21	128	-2.30003	-0.9105	21	2.04263	1	0	0	0	0	0	0	0	0	0		1	0	0		0
NA_014_087	4	5	Naoi	14	Lore Aichongat	1	8	1	14.2	18.6	117	-2.60485	-1.98098	18.6	1.47321	1	0	1	0	0	0	0	0	0	1	Dandruff	1	0	0		0
NA_015_001	4	5	Naitakosowan	15	Lore Apangaari	1	10	1	17	26.7	132	-1.07394	-1.03343	26.7	2.93996	0	0	0	0	0	0	0	0	0	0		1	0	0		0
NA_015_003	4	5	Naitakosowan	15	Lore Apakoelo	1	13	1	18.4	33.1	148	-1.55435	-0.863109	33.1	3.215	0	0	1	0	1	0	0	0	0	1	Wounds	1	0	0		0
NA_015_005	4	5	Naitakosowan	15	Lore Apangaari	1	10	0	16.4	24.9	131	-1.58183	-1.16859	24.9	2.4103	0	0	0	0	0	0	0	0	0	0		1	0	0		0
NA_015_006	4	5	Naitakosowan	15	Lore Apangaari	1	8	0	14.9	21.7	132	-1.16317	0.851442	21.7	2.16322	0	0	0	0	0	0	0	0	0	0		1	0	0		0
NA_015_007	4	5	Naitakosowan	15	Lore Apaepela	1	8	0	15	17.5	114	-2.81823	-2.43739	17.5	0.732923	1	1	0	0	0	0	0	0	0	0		1	1	0		0
NA_015_010	4	5	Naitakosowan	15	Lore Apakoelo	1	8	1	16.4	29.9	144	0.983031	2.94864	29.9	3.88331	0	0	0	0	0	0	0	0	0	0		1	1	0		0
NA_015_011	4	5	Naitakosowan	15	Lore Apangaari	1	8	1	14.9	19.5	115	-2.16626	-2.34613	19.5	1.8164	1	1	0	0	0	0	0	0	0	0		1	0	0		0
NA_015_013	4	5	Naitakosowan	15	Lore Apakoelo	1	8	0	14.7	20.9	126	-1.43231	-0.244834	20.9	1.9423	0	0	0	0	0	0	0	0	0	0		1	0	0		0
NA_015_014	4	5	Naitakosowan	15	Lore Apangaari	1	9	1	14.6	21.3	126	-2.17401	-1.25539	21.3	2.12438	1	0	0	0	0	0	0	0	0	0		1	0	0		0
NA_015_019	4	5	Naitakosowan	15	Lore Apakoelo	1	10	0	16.7	23.6	131	-1.94626	-1.16859	23.6	2.14664	0	0	0	0	0	0	0	0	0	0		1	0	0		0
NA_015_022	4	5	Naitakosowan	15	Lore Apaepela	1	9	0	17.5	26	139	-0.635997	1.05772	26	2.8267	0	0	0	0	0	0	0	0	0	0		1	0	0		0
NA_015_024	4	5	Naitakosowan	15	Lore Apangaari	1	10	0	16.3	25.5	136	-1.4245	-0.382189	25.5	2.52144	0	0	0	0	0	0	0	0	0	0		1	0	0		0
NA_015_025	4	5	Naitakosowan	15	Lore Apakoelo	1	10	1	16	26.6	139	-1.10137	0.0986535	26.6	2.92594	0	0	0	0	0	0	0	0	0	0		1	0	0		0
NA_015_028	4	5	Naitakosowan	15	Lore Apangaari	1	9	0	15.5	22.1	128	-1.72928	-0.824955	22.1	2.02285	0	0	0	0	0	0	0	0	0	0		1	0	0		0
NA_015_030	4	5	Naitakosowan	15	Lore Apangaari	1	11	0	16.8	25.6	129	-1.99948	-2.19253	25.6	2.3435	0	1	0	0	0	0	0	0	0	0		1	0	0		0
NA_015_032	4	5	Naitakosowan	15	Lore Apakoelo	1	13	1	15.2	28.7	147	-2.51238	-0.990599	28.7	2.73357	1	0	0	0	0	0	0	0	0	0		1	0	0		0
NA_015_034	4	5	Naitakosowan	15	Lore Kaakol	1	12	0	16.4	29.1	147	-1.85573	-0.38758	29.1	2.74161	0	0	0	0	0	0	0	0	0	0		1	0	0		0
NA_015_035	4	5	Naitakosowan	15	Lore Apangaari	1	8	1	15.2	20.1	115	-1.89573	-2.34613	20.1	2.02148	0	1	0	0	0	0	0	0	0	0		1	0	0		0
NA_015_036	4	5	Naitakosowan	15	Lore Apangaari	1	10	0	17	29.1	148	-0.59951	1.50517	29.1	3.07749	0	0	0	0	0	0	0	0	0	0		1	0	0		0
NA_015_038	4	5	Naitakosowan	15	Lore Apangaari	1	13	0	14.5	32.9	152	-1.91813	-0.4734	32.9	3.09822	0	0	0	0	0	0	0	0	0	0		1	0	0		0
NA_015_040	4	5	Naitakosowan	15	Lore Apakoelo	1	13	0	18.5	32.9	154	-1.91813	-0.184741	32.9	3.09822	0	0	0	0	0	0	0	0	0	0		1	0	0		0
NA_015_041	4	5	Naitakosowan	15	Lore Kaakol	1	14	0	19.6	37.6	156	-1.84817	-0.55165	37.6	3.48393	0	0	0	0	0	0	0	0	0	0		1	0	0		0
NA_015_042	4	5	Naitakosowan	15	Lore Apakoelo	1	13	1	15.4	27.9	145	-2.71217	-1.24558	27.9	2.62303	1	0	0	0	0	0	0	0	0	0		1	1	0		0
NA_015_043	4	5	Naitakosowan	15	Lore Apakoelo	1	12	0	16.2	26	137	-2.558	-1.79186	26	2.23413	1	0	0	0	0	0	0	0	0	0		1	0	0		0
NA_015_045	4	5	Naitakosowan	15	Lore Apakoelo	1	12	0	20	35.3	145	-0.725914	-0.668436	35.3	3.45595	0	0	1	0	0	0	0	0	0	1	Dandruff	1	0	0		0
NA_015_046	4	5	Naitakosowan	15	Lore Apangaari	1	13	0	16.9	31.4	146	-2.21159	-1.33938	31.4	2.91679	1	0	0	0	0	0	0	0	0	0		1	0	0		0
NA_015_047	4	5	Naitakosowan	15	Lore Apaepela	1	14	1	16.5	32.4	152	-2.43559	-1.2487	32.4	3.05848	1	0	0	0	0	0	0	0	0	0		1	0	0		0
NA_015_048	4	5	Naitakosowan	15	Lore Kaakol	1	11	0	19.1	29.7	142	-1.08005	-0.307418	29.7	2.98027	0	0	0	0	0	0	0	0	0	0		1	0	0		0
NA_015_049	4	5	Naitakosowan	15	Lore Apakoelo	1	9	1	13.8	20	125	-2.74869	-1.42783	20	1.74444	1	0	1	0	0	0	0	0	0	1	Dandruff	1	0	0		0
NA_015_051	4	5	Naitakosowan	15	Lore Apangaari	1	12	1	16.5	28.6	146	-1.84052	-0.32812	28.6	2.85278	0	0	0	0	0	0	0	0	0	0		1	0	0		0
NA_015_052	4	5	Naitakosowan	15	Lore Apakoelo	1	12	0	18.7	32.2	146	-1.25222	-0.528008	32.2	3.13833	0	0	0	0	0	0	0	0	0	0		1	0	0		0
NA_015_053	4	5	Naitakosowan	15	Lore Apangaari	1	10	1	17.2	25.2	125	-1.50942	-2.16552	25.2	2.7126	0	1	0	0	0	0	0	0	0	0		1	0	0		0
NA_015_054	4	5	Naitakosowan	15	Lore Apangaari	1	10	0	18	30.4	148	-0.343425	1.50517	30.4	3.24089	0	0	0	0	0	0	0	0	0	0		1	0	0		0
NA_015_055	4	5	Naitakosowan	15	Lore Apangaari	1	14	1	16.7	32.7	146	-2.37779	-1.97189	32.7	3.08916	1	0	0	0	0	0	0	0	0	0		1	1	0		0
NA_015_056	4	5	Naitakosowan	15	Lore Apakoelo	1	8	0	16.1	23.7	134	-0.561938	1.21687	23.7	2.63996	0	0	0	0	0	0	0	0	0	0		1	0	0		0
NA_015_059	4	5	Naitakosowan	15	Lore Apangaari	1	14	1	19.3	43	164	-0.74315	0.197671	43	3.81245	0	0	0	0	0	0	0	0	0	0		1	1	0		0
NA_015_061	4	5	Naitakosowan	15	Lore Kaakol	1	12	1	18.5	40	161	0.266313	1.75739	40	3.75261	0	0	0	0	0	0	0	0	0	0		1	0	0		0
NA_015_063	4	5	Naitakosowan	15	Lore Apangaari	1	8	0	15.3	20.5	121	-1.57391	-1.1584	20.5	1.82422	0	0	0	0	0	0	0	0	0	0		1	0	0		0
NA_015_065	4	5	Naitakosowan	15	Lore Apakoelo	1	8	0	15	21	125	-1.39767	-0.427547	21	1.97099	0	0	0	0	0	0	0	0	0	0		1	0	0		0
NA_015_067	4	5	Naitakosowan	15	Lore Apakoelo	1	11	0	16.2	25.1	140	-2.12781	-0.597435	25.1	2.24915	1	0	0	0	0	0	0	0	0	0		1	1	0		0
NA_015_068	4	5	Naitakosowan	15	Lore Apakoelo	1	8	0	16.2	25.9	136	0.0026086	1.58229	25.9	3.06616	0	0	0	0	0	0	0	0	0	0		1	0	0		0
NA_015_070	4	5	Naitakosowan	15	Lore Apaepela	1	14	1	17.9	32.6	153	-2.39698	-1.12817	32.6	3.07902	1	0	1	0	0	0	0	0	0	1	Dandruff	1	0	0		0
NA_015_071	4	5	Naitakosowan	15	Lore Kaakol	1	8	0	14.6	18.5	122	-2.36341	-0.975685	18.5	1.14289	1	0	0	0	0	0	0	0	0	0		1	1	0		0
NA_015_074	4	5	Naitakosowan	15	Lore Kaakol	1	10	1	17.1	27	137	-0.992924	-0.2248	27	2.98115	0	0	0	0	0	0	0	0	0	0		1	0	0		0
NA_015_075	4	5	Naitakosowan	15	Lore Apaepela	1	8	1	15	22.9	132	-0.821155	0.757701	22.9	2.78576	0	0	1	0	1	0	0	0	0	0		1	0	0		0
NA_015_079	4	5	Naitakosowan	15	Lore Apaepela	1	8	0	16.9	23.4	130	-0.646249	0.486016	23.4	2.57451	0	0	0	0	0	0	0	0	0	0		1	0	0		0
NA_016_002	4	2	Lominit	16	Lore Apalopale	1	10	1	15.6	22.2	128	-2.56647	-1.68034	22.2	2.11993	1	0	1	0	0	0	0	0	0	1	wounds	1	1	0		0
NA_016_003	4	2	Lominit	16	Lore Achuule	1	10	0	15	21.1	127	-2.75451	-1.79771	21.1	1.53106	1	0	0	0	0	0	0	0	0	0		1	0	0		0
NA_016_004	4	2	Lominit	16	Lore Aloitanin	1	11	0	19.4	36.4	152	0.0537197	1.14267	36.4	3.6722	0	0	0	0	0	0	0	0	0	0		1	0	0		0
NA_016_006	4	2	Lominit	16	Lore Apalopale	1	12	1	15.7	27.6	138	-2.10144	-1.44039	27.6	2.72147	1	0	1	0	1	0	0	0	0	0		1	0	0		0
NA_016_009	4	2	Lominit	16	Lore Apalopale	1	13	1	17.2	35.3	154	-1.14822	-0.0981679	35.3	3.39584	0	0	0	0	0	0	0	0	0	0		1	0	0		0
NA_016_010	4	2	Lominit	16	Lore Achuule	1	9	1	16.6	27.1	140	-0.307274	1.15882	27.1	3.22923	0	0	0	0	0	0	0	0	0	0		1	0	0		0
NA_016_013	4	2	Lominit	16	Lore Aloitanin	1	10	0	16.9	27.1	139	-1.03451	0.0896507	27.1	2.78991	0	0	0	0	0	0	0	0	0	0		1	0	0		0
NA_016_014	4	2	Lominit	16	Lore Aloitanin	1	11	1	17.1	29.6	139	-0.988595	-0.657192	29.6	3.11235	0	0	1	0	0	0	0	0	0	1	Multiple skin wounds	1	0	0		0
NA_016_015	4	2	Lominit	16	Lore Apalopale	1	12	1	15.7	30	143	-1.50238	-0.745222	30	3.01639	0	0	0	0	0	0	0	0	0	0		1	0	0		0
NA_016_016	4	2	Lominit	16	Lore Apalopale	1	11	0	19.3	33.3	153	-0.42549	1.28768	33.3	3.39217	0	0	0	0	0	0	0	0	0	0		1	0	0		0
NA_016_017	4	2	Lominit	16	Lore Achuule	1	14	0	21.5	41.9	159	-1.13087	-0.0932151	41.9	3.82486	0	0	0	0	0	0	0	0	0	0		1	0	0		0
NA_016_019	4	2	Lominit	16	Lore Achuule	1	13	0	23	46.4	156	0.129392	0.103917	46.4	4.14747	0	0	0	0	0	0	0	0	0	0		1	0	0		0
NA_016_020	4	2	Lominit	16	Lore Achuule	1	13	0	20.5	41.9	161	-0.457608	0.825565	41.9	3.88278	0	0	0	0	0	0	0	0	0	0		1	0	0		0
NA_016_027	4	2	Lominit	16	Lore Apalopale	1	8	1	15.5	23.1	129	-0.754391	0.209966	23.1	2.83056	0	0	0	0	0	0	0	0	0	0		1	0	0		0
NA_016_028	4	2	Lominit	16	Lore Apalopale	1	12	0	20	38.4	156	-0.261356	0.876271	38.4	3.71529	0	0	0	0	0	0	0	0	0	0		1	0	0		0
NA_016_029	4	2	Lominit	16	Lore Apalopale	1	13	1	17.1	34	156	-1.38313	0.156812	34	3.29287	0	0	0	0	0	0	0	0	0	0		1	0	0		0
NA_016_030	4	2	Lominit	16	Lore Aloitanin	1	10	1	16	23.3	127	-2.14574	-1.84207	23.3	2.36265	1	0	0	0	0	0	0	0	0	0		1	0	0		0
NA_016_031	4	2	Lominit	16	Lore Aloitanin	1	10	0	18.2	25.3	134	-1.47623	-0.696749	25.3	2.48508	0	0	0	0	0	0	0	0	0	0		1	0	0		0
NA_016_032	4	2	Lominit	16	Lore Achuule	1	10	0	16	22.6	133	-2.25103	-0.854029	22.6	1.91949	1	0	0	0	0	0	0	0	0	0		1	0	0		0
NA_016_033	4	2	Lominit	16	Lore Aloitanin	1	8	1	16	23.9	128	-0.498538	0.0273871	23.9	2.99931	0	0	0	0	0	0	0	0	0	0		1	0	0		0
NA_016_034	4	2	Lominit	16	Lore Apalopale	1	12	1	16.8	23.9	139	-3.24117	-1.30136	23.9	2.09572	2	0	0	0	0	0	0	0	0	0		1	0	0		0
NA_016_038	4	2	Lominit	16	Lore Achuule	1	10	0	17.6	28.7	140	-0.682318	0.246931	28.7	3.02371	0	0	0	0	0	0	0	0	0	0		1	0	0		0
NA_016_039	4	2	Lominit	16	Lore Apalopale	1	10	0	17.5	28.7	142	-0.682318	0.561491	28.7	3.02371	0	0	0	0	0	0	0	0	0	0		1	0	0		0
NA_016_040	4	2	Lominit	16	Lore Achuule	1	8	0	17	25.7	127	-0.045132	-0.0621217	25.7	3.03094	0	0	0	0	0	0	0	0	0	0		1	0	0		0
NA_016_041	4	2	Lominit	16	Lore Achuule	1	8	0	16	23.2	132	-0.703539	0.851442	23.2	2.52978	0	0	0	0	0	0	0	0	0	0		1	0	0		0
NA_016_045	4	2	Lominit	16	Lore Achuule	1	8	1	14.7	21.1	120	-1.47913	-1.43324	21.1	2.32738	0	0	0	0	0	0	0	0	0	0		1	0	0		0
NA_016_050	4	2	Lominit	16	Lore Apalopale	1	9	1	15.5	22.8	132	-1.59585	-0.220727	22.8	2.48804	0	0	0	0	0	0	0	0	0	0		1	0	0		0
NA_016_052	4	2	Lominit	16	Lore Achuule	1	12	1	16.4	31.5	144	-1.17109	-0.606188	31.5	3.16951	0	0	0	0	0	0	0	0	0	0		1	0	0		0
NA_016_053	4	2	Lominit	16	Lore Apalopale	1	8	0	17.5	22.8	128	-0.820812	0.120591	22.8	2.43755	0	0	0	0	0	0	0	0	0	0		1	0	0		0
NA_016_054	4	2	Lominit	16	Lore Apalopale	1	9	0	15.4	19.6	124	-2.6313	-1.50956	19.6	1.30516	1	0	0	0	0	0	0	0	0	0		1	0	0		0
NA_016_057	4	2	Lominit	16	Lore Achuule	1	8	0	15	30.6	122	0.961951	-0.975685	30.6	3.74151	0	0	1	0	0	0	0	0	0	1	Dandruff, wounds	1	1	0		0
NA_016_060	4	2	Lominit	16	Lore Achuule	1	9	0	14.4	24.4	132	-1.04674	-0.140346	24.4	2.53333	0	0	0	0	0	0	0	0	0	0		1	0	0		0
NA_016_061	4	2	Lominit	16	Lore Achuule	1	8	0	13.7	17.3	118	-2.91482	-1.70654	17.3	0.644233	1	0	0	0	0	0	0	0	0	0		1	0	0		0
NA_016_062	4	2	Lominit	16	Lore Apalopale	1	8	0	14.7	19.1	122	-2.11105	-0.975685	19.1	1.36489	1	0	1	0	1	0	0	0	0	0		1	0	0		0
NA_016_063	4	2	Lominit	16	Lore Achuule	1	8	0	14.5	19.4	125	-1.99012	-0.427547	19.4	1.46987	0	0	0	0	0	0	0	0	0	0		1	0	0		0
NA_016_065	4	2	Lominit	16	Lore Achuule	1	8	1	16.2	21.4	123	-1.36176	-0.885506	21.4	2.41137	0	0	0	0	0	0	0	0	0	0		1	0	0		0
NA_016_066	4	2	Lominit	16	Lore Achuule	1	8	1	16.3	23.2	125	-0.721442	-0.520349	23.2	2.85255	0	0	0	0	0	0	0	0	0	0		1	0	0		0
NA_017_001	4	4	Lopuu	17	Lore Apalomoe	1	14	1	21.6	49.9	170	0.0815229	0.92086	49.9	4.08536	0	0	0	0	0	0	0	0	0	0		1	0	0		0
NA_017_002	4	4	Lopuu	17	Lore Lokiteded	1	12	1	17.5	26.7	146	-2.35169	-0.32812	26.7	2.59136	1	0	0	0	0	0	0	0	0	0		1	0	0		0
NA_017_005	4	4	Lopuu	17	Lore Lokiteded	1	10	1	15.5	27.1	152	-0.966336	2.2011	27.1	2.9946	0	0	0	0	0	0	0	0	0	0		1	1	0		0
NA_017_006	4	4	Lopuu	17	Lore Lokiteded	1	10	1	16	26.6	152	-1.10137	2.2011	26.6	2.92594	0	0	0	0	0	0	0	0	0	0		1	1	0		0
NA_017_008	4	4	Lopuu	17	Lore Lokiteded	1	8	1	15.6	20.1	130	-1.89573	0.392544	20.1	2.02148	0	0	0	0	0	0	0	0	0	0		2	1	0		0
NA_017_009	4	4	Lopuu	17	Lore Lokiteded	1	8	1	14.8	19.7	131	-2.07425	0.575123	19.7	1.88672	1	0	1	0	1	0	0	0	0	0		1	0	0		0
NA_017_010	4	4	Lopuu	17	Lore Lokiteded	1	12	1	16.7	27.8	146	-2.04786	-0.32812	27.8	2.7488	1	0	1	0	1	0	0	0	0	1	Wounds	1	1	0		0
NA_017_012	4	4	Lopuu	17	Lore Lokiteded	1	9	0	20.2	30.4	145	0.291987	2.08463	30.4	3.45037	0	0	0	0	0	0	0	0	0	0		1	0	0		0
NA_017_013	4	4	Lopuu	17	Lore Lokiteded	1	9	0	16.2	29.9	150	0.198865	2.94039	29.9	3.39027	0	0	0	0	0	0	0	0	0	0		1	0	0		0
NA_017_014	4	4	Lopuu	17	Lore Lokiteded	1	10	0	20.1	32.1	156	-0.0357243	2.76341	32.1	3.43141	0	0	0	0	0	0	0	0	0	0		1	1	0		0
NA_017_015	4	4	Lopuu	17	Lore Lokiteded	1	9	0	19.6	28.1	149	-0.160739	2.76924	28.1	3.15296	0	0	0	0	0	0	0	0	0	0		1	0	0		0
NA_017_017	4	4	Lopuu	17	Lore Lokiteded	1	8	0	18.3	28.1	146	0.487398	3.40942	28.1	3.41524	0	0	0	0	0	0	0	0	0	0		1	0	0		0
NA_017_018	4	4	Lopuu	17	Lore Lokiteded	1	8	0	15.5	19.6	125	-1.91134	-0.427547	19.6	1.53777	0	0	1	0	1	0	0	0	0	0		1	1	0		0
NA_017_022	4	4	Lopuu	17	Lore Lokiteded	1	14	0	21	45.9	173	-0.54373	2.04615	45.9	4.07795	0	0	0	0	0	0	0	0	0	0		1	1	0		0
NA_017_025	4	4	Lopuu	17	Lore Lokiteded	1	8	0	16.1	20.7	131	-1.5025	0.668729	20.7	1.88393	0	0	0	0	0	0	0	0	0	0		1	0	0		0
NA_017_026	4	4	Lopuu	17	Lore Alokol	1	8	0	16.2	20.1	126	-1.72055	-0.244834	20.1	1.70062	0	0	0	0	0	0	0	0	0	0		1	1	0		0
NA_017_027	4	4	Lopuu	17	Lore Lokiteded	1	8	0	16	20.1	129	-1.72055	0.303304	20.1	1.70062	0	0	0	0	0	0	0	0	0	0		1	0	0		0
NA_017_028	4	4	Lopuu	17	Lore Lokiteded	1	8	0	16.9	22.6	137	-0.880839	1.76501	22.6	2.38999	0	0	0	0	0	0	0	0	0	0		1	1	0		0
NA_017_029	4	4	Lopuu	17	Lore Lokiteded	1	10	0	15.8	21.2	137	-2.71903	-0.224909	21.2	1.55896	1	0	1	0	1	0	0	0	0	0		1	0	0		0
NA_017_031	4	4	Lopuu	17	Lore Lokiteded	1	8	0	15	17.5	127	-2.81823	-0.0621217	17.5	0.732923	1	0	0	0	0	0	0	0	0	0		1	1	0		0
NA_017_033	4	4	Lopuu	17	Lore Alokol	1	14	1	22.6	48.2	175	-0.106722	1.52352	48.2	4.02781	0	0	1	0	0	0	0	0	0	1	Wounds	1	1	0		0
NA_017_034	4	4	Lopuu	17	Lore Lokiteded	1	13	1	17.8	30.7	153	-2.0497	-0.225658	30.7	2.97593	1	0	0	0	0	0	0	0	0	0		1	0	0		0
NA_017_035	4	4	Lopuu	17	Lore Lokiteded	1	14	1	20	43.3	176	-0.703657	1.64405	43.3	3.82679	0	0	0	0	0	0	0	0	0	0		1	0	0		0
NA_017_037	4	4	Lopuu	17	Lore Lokiteded	1	9	1	14	20.8	133	-2.38615	-0.0482839	20.8	1.98626	1	0	0	0	0	0	0	0	0	0		1	0	0		0
NA_017_042	4	4	Lopuu	17	Lore Apalomoe	1	12	1	17.3	27.1	142	-2.23857	-0.884255	27.1	2.65068	1	0	1	0	1	0	0	0	1	0		1	1	0		0
NA_017_044	4	4	Lopuu	17	Lore Lokiteded	1	10	1	15.7	25.1	144	-1.5404	0.907288	25.1	2.69605	0	0	0	0	0	0	0	0	0	0		1	0	0		0
NA_017_047	4	4	Lopuu	17	Lore Lokiteded	1	8	1	15	20.7	135	-1.64093	1.30544	20.7	2.21001	0	0	0	0	0	0	0	0	0	0		1	1	0		0
NA_017_048	4	4	Lopuu	17	Lore Alokol	1	14	1	20.7	46.7	173	-0.280427	1.28245	46.7	3.97228	0	0	0	0	0	0	0	0	0	0		1	1	0		0
NA_017_050	4	4	Lopuu	17	Lore Apalomoe	1	11	0	19.1	33.8	149	-0.343469	0.707643	33.8	3.44138	0	0	0	0	0	0	0	0	0	0		1	1	0		0
NA_017_051	4	4	Lopuu	17	Lore Apalomoe	1	11	0	18.6	31.1	146	-0.811141	0.272617	31.1	3.15362	0	0	0	0	0	0	0	0	0	0		1	1	0		0
NA_017_053	4	4	Lopuu	17	Lore Apalomoe	1	14	0	24	51.2	166	0.14019	0.976465	51.2	4.34532	0	0	0	0	0	0	0	0	0	0		1	1	0		0
NA_017_055	4	4	Lopuu	17	Lore Apalomoe	1	12	0	16.7	26.5	134	-2.43691	-2.21314	26.5	2.32526	1	1	0	0	0	0	0	0	0	0		1	1	0		0
NA_017_057	4	4	Lopuu	17	Lore Apalomoe	1	10	0	17.3	25.8	134	-1.3482	-0.696749	25.8	2.57475	0	0	0	0	0	0	0	0	0	0		1	1	0		0
NA_017_058	4	4	Lopuu	17	Lore Apalomoe	1	11	1	17.8	30	142	-0.897032	-0.20603	30	3.15441	0	0	0	0	0	0	0	0	0	0		1	1	0		0
NA_017_059	4	4	Lopuu	17	Lore Alokol	1	9	1	16.7	25.1	136	-0.849188	0.469046	25.1	2.9294	0	0	0	0	0	0	0	0	0	0		1	0	0		0
NA_017_060	4	4	Lopuu	17	Lore Apalomoe	1	10	0	15.3	21.7	133	-2.54591	-0.854029	21.7	1.69397	1	0	0	0	0	0	0	0	0	0		1	0	0		0
NA_017_061	4	4	Lopuu	17	Lore Apalomoe	1	10	0	20	36.5	153	0.644288	2.29157	36.5	3.82976	0	0	0	0	0	0	0	0	0	0		1	1	0		0
NA_017_063	4	4	Lopuu	17	Lore Apalomoe	1	14	0	22.2	41.2	151	-1.24103	-1.31571	41.2	3.77482	0	0	0	0	0	0	0	0	0	0		1	1	0		0
NA_017_065	4	4	Lopuu	17	Lore Alokol	1	13	1	21.7	42.7	160	-0.0347506	0.666773	42.7	3.82559	0	0	0	0	0	0	0	0	0	0		1	1	0		0
NA_017_069	4	4	Lopuu	17	Lore Alokol	1	8	0	16.3	22.3	124	-0.972683	-0.61026	22.3	2.31678	0	0	0	0	0	0	0	0	0	0		1	1	0		0
NA_017_083	4	4	Lopuu	17	Lore Apalomoe	1	9	0	15.2	25	130	-0.887215	-0.482651	25	2.64851	0	0	1	0	1	0	0	0	0	0		1	0	0		0
NA_017_084	4	4	Lopuu	17	Lore Lokiteded	1	12	0	20	43.4	158	0.38567	1.15713	43.4	4.04514	0	0	0	0	0	0	0	0	0	0		1	1	0		0
NA_018_001	4	5	Kaingolejek	18	Lore Apomomwo	1	10	1	16.7	24.8	125	-1.6349	-2.16552	24.8	2.64525	0	1	0	0	0	0	0	0	0	0		1	0	0		0
NA_018_002	4	5	Kaingolejek	18	Lore Alongoringole	1	10	1	16	23	127	-2.2563	-1.84207	23	2.29974	1	0	0	0	0	0	0	0	0	0		1	0	0		0
NA_018_005	4	5	Kaingolejek	18	Lore Alongoringole	1	10	1	18.3	33.1	146	0.322581	1.23074	33.1	3.59993	0	0	1	0	0	0	0	0	0	1	Wounds	1	1	0		0
NA_018_006	4	5	Kaingolejek	18	Lore Apomomwo	1	8	1	15.1	19.6	118	-2.12002	-1.7984	19.6	1.85181	1	0	1	0	0	0	0	0	0	1	Dandruff	1	0	0		0
NA_018_008	4	5	Kaingolejek	18	Lore Apooreng	1	10	1	19.3	36.4	155	0.842729	2.68628	36.4	3.81768	0	0	1	0	0	0	0	0	0	1	wounds	1	0	0		0
NA_018_010	4	5	Kaingolejek	18	Lore Apooreng	1	11	1	16.7	39.4	166	0.715522	3.40326	39.4	3.81806	0	0	0	0	0	0	0	0	0	0		1	1	0		0
NA_018_011	4	5	Kaingolejek	18	Lore Apomomwo	1	8	1	13.8	17.2	117	-3.37858	-1.98098	17.2	0.835866	2	0	1	0	0	0	0	0	0	1	Wounds	1	0	0		0
NA_018_013	4	5	Kaingolejek	18	Lore Apameri	1	11	0	18.8	32.4	148	-0.578197	0.562634	32.4	3.29912	0	0	0	0	0	0	0	0	0	0		1	0	0		0
NA_018_014	4	5	Kaingolejek	18	Lore Apooreng	1	10	0	15.7	20.5	136	-2.97359	-0.382189	20.5	1.35694	1	0	0	0	0	0	0	0	0	0		1	1	0		0
NA_018_016	4	5	Kaingolejek	18	Lore Apomomwo	1	14	0	22.7	48.7	157	-0.170492	-0.398838	48.7	4.2274	0	0	0	0	0	0	0	0	0	0		1	0	0		0
NA_018_017	4	5	Kaingolejek	18	Lore Apomomwo	1	9	0	17.4	24.4	129	-1.04674	-0.653803	24.4	2.53333	0	0	1	0	0	0	0	0	1	0		1	0	0		0
NA_018_018	4	5	Kaingolejek	18	Lore Apomomwo	1	13	0	18.4	31	147	-2.29288	-1.19505	31	2.86501	1	0	0	0	0	0	0	0	0	0		1	1	0		0
NA_018_019	4	5	Kaingolejek	18	Lore Apooreng	1	8	0	16.2	19.4	115	-1.99012	-2.25467	19.4	1.46987	0	1	0	0	0	0	0	0	0	0		1	0	0		0
NA_018_021	4	5	Kaingolejek	18	Lore Apooreng	1	9	0	17.4	26.7	137	-0.47017	0.715415	26.7	2.94215	0	0	1	0	1	0	0	0	0	1	Wound	1	1	0		0
NA_018_023	4	5	Kaingolejek	18	Lore Apooreng	1	10	0	17	21.8	124	-2.51211	-2.26955	21.8	1.72011	1	1	0	0	0	0	0	0	0	0		1	0	0		0
NA_018_024	4	5	Kaingolejek	18	Lore Apooreng	1	8	0	16.1	21.8	124	-1.13077	-0.61026	21.8	2.1895	0	0	1	0	1	0	0	0	0	0		1	0	0		0
NA_018_025	4	5	Kaingolejek	18	Lore Apooreng	1	8	1	15.9	23.3	133	-0.688777	0.94028	23.3	2.87428	0	0	1	0	0	0	0	0	0	1	Wound	1	0	0		0
NA_018_027	4	5	Kaingolejek	18	Lore Apooreng	1	14	0	19.7	31	145	-3.18281	-2.23258	31	2.74784	2	1	0	0	0	0	0	0	0	0		1	1	0		0
NA_018_028	4	5	Kaingolejek	18	Lore Apooreng	1	9	1	14.7	22.9	135	-1.56012	0.296602	22.9	2.50989	0	0	0	0	0	0	0	0	0	0		1	0	0		0
NA_018_031	4	5	Kaingolejek	18	Lore Apooreng	1	10	0	15.9	21.9	125	-2.47858	-2.11227	21.9	1.74597	1	1	1	0	1	0	0	0	0	0		1	0	0		0
NA_018_032	4	5	Kaingolejek	18	Lore Apooreng	1	8	1	14.5	25.3	133	-0.0898214	0.94028	25.3	3.25914	0	0	0	0	0	0	0	0	0	0		1	0	0		0
NA_018_033	4	5	Kaingolejek	18	Lore Apooreng	1	8	1	14.1	20.7	125	-1.64093	-0.520349	20.7	2.21001	0	0	0	0	0	0	0	0	0	0		1	0	0		0
NA_018_034	4	5	Kaingolejek	18	Lore Apooreng	1	10	0	17.1	24.3	134	-1.74585	-0.696749	24.3	2.29271	0	0	1	0	0	0	0	0	0	1	Wounds	1	0	0		0
NA_018_038	4	5	Kaingolejek	18	Lore Apomomwo	1	9	0	17.3	24.8	136	-0.939624	0.544263	24.8	2.61084	0	0	0	0	0	0	0	0	0	0		1	0	0		0
NA_018_041	4	5	Kaingolejek	18	Lore Apooreng	1	8	1	14.1	18.1	113	-2.86741	-2.71129	18.1	1.26148	1	1	0	0	0	0	0	0	0	0		1	0	0		0
NA_018_042	4	5	Kaingolejek	18	Lore Apomomwo	1	10	0	16.2	25.5	137	-1.4245	-0.224909	25.5	2.52144	0	0	0	0	0	0	0	0	0	0		1	0	0		0
NA_018_046	4	5	Kaingolejek	18	Lore Apameri	1	8	0	15.2	17.9	117	-2.63085	-1.88925	17.9	0.903357	1	0	1	0	1	0	0	0	0	0		1	1	0		0
NA_018_047	4	5	Kaingolejek	18	Lore Apameri	1	8	0	13.6	16.8	113	-3.16527	-2.6201	16.8	0.411636	2	1	0	0	0	0	0	0	0	0		1	0	0		0
NA_018_048	4	5	Kaingolejek	18	Lore Apameri	1	8	1	12.7	17.2	115	-3.37858	-2.34613	17.2	0.835866	2	1	0	0	0	0	0	0	0	0		1	0	0		0
NA_018_049	4	5	Kaingolejek	18	Lore Apooreng	1	8	1	13.6	17.2	115	-3.37858	-2.34613	17.2	0.835866	2	1	1	0	0	0	0	0	0	1	Wound on toe one of the Right	1	0	0		0
NA_018_053	4	5	Kaingolejek	18	Lore Apameri	1	12	1	16.7	27.7	140	-2.07456	-1.16232	27.7	2.7352	1	0	1	0	0	0	0	0	0	1	Wound on the legs	1	0	0		0
NA_018_055	4	5	Kaingolejek	18	Lore Apomomwo	1	8	0	17.6	25.1	129	-0.192429	0.303304	25.1	2.9213	0	0	1	0	1	0	0	0	0	0		1	0	0		0
NA_018_056	4	5	Kaingolejek	18	Lore Apameri	1	8	0	13.7	17.7	123	-2.72359	-0.792973	17.7	0.819269	1	0	1	0	0	0	0	0	0	1	Dead skin	1	0	0		0
NA_018_061	4	5	Kaingolejek	18	Lore Apooreng	1	10	0	18.1	26.6	133	-1.15203	-0.854029	26.6	2.71007	0	0	1	0	1	0	0	0	0	0		1	1	0		0
NA_018_063	4	5	Kaingolejek	18	Lore Apooreng	1	10	1	16.3	27.9	142	-0.760821	0.583834	27.9	3.09722	0	0	0	0	0	0	0	0	0	0		1	0	0		0
NA_019_003	4	5	Angaro	19	Lore Amoding	1	8	0	16.4	24	132	-0.479515	0.851442	24	2.70349	0	0	1	0	0	0	0	0	0	1	wounds on both legs	1	0	0		0
NA_019_005	4	5	Angaro	19	Lore Amoding	1	11	0	20.8	41.4	161	0.703146	2.44775	41.4	4.02308	0	0	0	0	0	0	0	0	0	0		1	1	0		0
NA_019_006	4	5	Angaro	19	Lore Amoding	1	12	0	21.4	43.8	158	0.432846	1.15713	43.8	4.06781	0	0	0	0	0	0	0	0	0	0		1	0	0		0
NA_019_009	4	5	Angaro	19	Lore Amoding	1	8	1	14.7	21.9	126	-1.17331	-0.33777	21.9	2.54422	0	0	0	0	0	0	0	0	0	0		1	0	0		0
NA_019_012	4	5	Angaro	19	Lore Amoding	1	10	1	17.2	32.4	147	0.197932	1.39247	32.4	3.54544	0	0	0	0	0	0	0	0	0	0		1	0	0		0
NA_019_014	4	5	Angaro	19	Lore Amoding	1	8	1	16.4	22.6	128	-0.923522	0.0273871	22.6	2.71645	0	0	0	0	0	0	0	0	0	0		1	0	0		0
NA_019_015	4	5	Angaro	19	Lore Aporengen	1	10	1	18.5	33.5	146	0.391358	1.23074	33.5	3.62962	0	0	1	0	0	0	0	0	0	1	Dandruff	1	0	0		0
NA_019_016	4	5	Angaro	19	Lore Amoding	1	8	1	15	21.1	123	-1.47913	-0.885506	21.1	2.32738	0	0	0	0	0	0	0	0	0	0		1	0	0		0
NA_019_021	4	5	Angaro	19	Lore Amoding	1	8	1	14.1	17.1	111	-3.43871	-3.07645	17.1	0.784645	2	2	0	0	0	0	0	0	0	0		1	1	0		0
NA_019_022	4	5	Angaro	19	Lore Amoding	1	9	1	16.7	23.3	130	-1.42041	-0.565613	23.3	2.59464	0	0	0	0	0	0	0	0	0	0		1	0	0		0
NA_019_026	4	5	Angaro	19	Lore Amoding	1	8	0	13.1	15.6	115	-3.82459	-2.25467	15.6	-0.218639	2	1	0	0	0	0	0	0	0	0		1	0	0		0
NA_019_028	4	5	Angaro	19	Lore Amoding	1	8	0	13.2	15.6	118	-3.82459	-1.70654	15.6	-0.218639	2	0	0	0	0	0	0	0	0	0		1	0	0		0
NA_019_029	4	5	Angaro	19	Lore Aporengen	1	8	0	13.6	17.3	115	-2.91482	-2.25467	17.3	0.644233	1	1	0	0	0	0	0	0	0	0		1	0	0		0
NA_019_030	4	5	Angaro	19	Lore Amoding	1	10	0	18.9	29.2	140	-0.579114	0.246931	29.2	3.09066	0	0	0	0	0	0	0	0	0	0		1	0	0		0
NA_019_032	4	5	Angaro	19	Lore Amoding	1	8	0	13.3	14.6	108	-4.44753	-3.53366	14.6	-0.837757	2	2	0	0	0	0	0	0	0	0		1	0	0		0
NA_019_034	4	5	Angaro	19	Lore Aporengen	1	8	0	19.2	29.6	141	0.78074	2.49586	29.6	3.61874	0	0	1	0	1	0	0	0	0	1	Wounds	1	0	0		0
NA_019_036	4	5	Angaro	19	Lore Amoding	1	8	1	13.1	16.7	114	-3.68644	-2.52871	16.7	0.571056	2	1	0	0	0	0	0	0	0	0		1	0	0		0
NA_019_037	4	5	Angaro	19	Lore Amoding	1	11	1	16.1	29.5	142	-1.01188	-0.20603	29.5	3.10158	0	0	1	0	1	0	0	0	0	0		1	0	0		0
NA_019_039	4	5	Angaro	19	Lore Amoding	1	9	1	17	27.6	142	-0.184609	1.5037	27.6	3.29465	0	0	0	0	0	0	0	0	0	0		1	0	0		0
NA_020_001	5	3	Lokupoi TC-Lokitela	20	Lore Apaangakorio	1	12	1	17.5	30.9	146	-1.30003	-0.32812	30.9	3.11076	0	0	0	0	0	0	0	0	0	0		1	0	0		0
NA_020_002	5	3	Lokupoi TC-Lokitela	20	Lore Apaangakorio	1	10	1	17.8	29.2	140	-0.451994	0.26038	29.2	3.24713	0	0	0	0	0	0	0	0	0	0		1	0	0		0
NA_020_003	5	3	Lokupoi TC-Lokitela	20	Lore Apaangakorio	1	11	1	16.6	23.9	122	-2.62985	-3.21377	23.9	2.28118	1	2	0	0	0	0	0	0	0	0		1	0	0		0
NA_020_004	5	3	Lokupoi TC-Lokitela	20	Lore Apaangakorio	1	10	1	16.4	25.5	136	-1.41803	-0.386527	25.5	2.76115	0	0	0	0	0	0	0	0	0	0		1	0	0		0
NA_020_005	5	3	Lokupoi TC-Lokitela	20	Lore Akotol	1	11	0	19.4	33.8	147	-0.343469	0.417626	33.8	3.44138	0	0	0	0	0	0	0	0	0	0		1	0	0		0
NA_020_006	5	3	Lokupoi TC-Lokitela	20	Lore Akotol	1	10	0	20	33	147	0.116051	1.34789	33	3.52304	0	0	0	0	0	0	0	0	0	0		1	0	0		0
NA_020_007	5	3	Lokupoi TC-Lokitela	20	Lore Apaangakorio	1	13	1	19.2	33	144	-1.57383	-1.37307	33	3.20598	0	0	0	0	0	0	0	0	0	0		1	0	0		0
NA_020_008	5	3	Lokupoi TC-Lokitela	20	Lore Akotol	1	10	0	20	31	138	-0.231503	-0.0676292	31	3.31093	0	0	0	0	0	0	0	0	0	0		1	0	0		0
NA_020_010	5	3	Lokupoi TC-Lokitela	20	Lore Apaangakorio	1	13	0	22.5	47	166	0.202136	1.54721	47	4.17842	0	0	0	0	0	0	0	0	0	0		1	0	0		0
NA_020_011	5	3	Lokupoi TC-Lokitela	20	Lore Akotol	1	8	1	25.2	25.2	135	-0.117506	1.30544	25.2	3.24192	0	0	1	0	1	0	0	0	0	0		1	0	0		0
NA_020_013	5	3	Lokupoi TC-Lokitela	20	Lore Alokai	1	13	0	22.3	44.6	158	-0.0962787	0.392576	44.6	4.0489	0	0	0	0	0	0	0	0	0	0		1	0	0		0
NA_020_014	5	3	Lokupoi TC-Lokitela	20	Lore Akotol	1	13	1	18	32.5	150	-1.67269	-0.608128	32.5	3.15976	0	0	0	0	0	0	0	0	0	0		1	0	0		0
NA_020_015	5	3	Lokupoi TC-Lokitela	20	Lore Akotol	1	8	0	15	19.9	117	-1.79584	-1.88925	19.9	1.63663	0	0	1	0	1	0	0	0	0	0		1	0	0		0
NA_020_018	5	3	Lokupoi TC-Lokitela	20	Lore Alokai	1	12	1	16.5	26.9	144	-2.29474	-0.606188	26.9	2.62133	1	0	0	0	0	0	0	0	0	0		1	0	0		0
NA_020_019	5	3	Lokupoi TC-Lokitela	20	Lore Alokai	1	12	0	17	24.7	135	-2.88891	-2.07272	24.7	1.9772	1	1	1	0	0	0	0	0	0	1	Dandruff	1	0	0		0
NA_020_021	5	3	Lokupoi TC-Lokitela	20	Lore Akotol	1	8	0	13	14.5	109	-4.51404	-3.35095	14.5	-0.905199	2	2	0	0	0	0	0	0	0	0		1	0	0		0
NA_020_022	5	3	Lokupoi TC-Lokitela	20	Lore Akotol	1	13	1	20.5	33.7	146	-1.43939	-1.11809	33.7	3.26755	0	0	0	0	0	0	0	0	0	0		1	0	0		0
NA_020_025	5	3	Lokupoi TC-Lokitela	20	Lore Apaangakorio	1	10	0	20	30	136	-0.42018	-0.382189	30	3.19238	0	0	0	0	0	0	0	0	0	0		1	0	0		0
NA_020_026	5	3	Lokupoi TC-Lokitela	20	Lore Alokai	1	12	1	17	31.6	151	-1.15004	0.367049	31.6	3.179	0	0	0	0	0	0	0	0	0	0		1	0	0		0
NA_020_027	5	3	Lokupoi TC-Lokitela	20	Lore Apaangakorio	1	11	0	20.5	34.8	149	-0.185102	0.707643	34.8	3.5349	0	0	0	0	0	0	0	0	0	0		1	0	0		0
NA_020_028	5	3	Lokupoi TC-Lokitela	20	Lore Akotol	1	11	1	17	26.3	141	-1.8513	-0.356417	26.3	2.69354	0	0	0	0	0	0	0	0	0	0		1	0	0		0
NA_020_029	5	3	Lokupoi TC-Lokitela	20	Lore Apaangakorio	1	10	0	18	28.6	145	-0.703332	1.03333	28.6	3.01	0	0	0	0	0	0	0	0	0	0		1	0	0		0
NA_020_031	5	3	Lokupoi TC-Lokitela	20	Lore Apaangakorio	1	13	1	20	38.6	155	-0.60953	0.0293222	38.6	3.61549	0	0	0	0	0	0	0	0	0	0		1	0	0		0
NA_020_032	5	3	Lokupoi TC-Lokitela	20	Lore Akotol	1	9	0	17.7	26.2	132	-0.587811	-0.140346	26.2	2.86042	0	0	0	0	0	0	0	0	0	0		1	0	0		0
NA_020_033	5	3	Lokupoi TC-Lokitela	20	Lore Akotol	1	8	1	14.5	20.1	124	-1.89573	-0.702927	20.1	2.02148	0	0	0	0	0	0	0	0	0	0		1	0	0		0
NA_020_035	5	3	Lokupoi TC-Lokitela	20	Lore Apaangakorio	1	8	1	16	25	132	-0.17354	0.757701	25	3.2069	0	0	0	0	0	0	0	0	0	0		1	0	0		0
NA_020_036	5	3	Lokupoi TC-Lokitela	20	Lore Apaangakorio	1	8	0	17	28.3	135	0.528115	1.39958	28.3	3.44384	0	0	0	0	0	0	0	0	0	0		1	1	0		0
NA_020_037	5	3	Lokupoi TC-Lokitela	20	Lore Apaangakorio	1	8	1	15	20	123	-1.93969	-0.885506	20	1.9885	0	0	0	0	0	0	0	0	0	0		1	0	0		0
NA_020_042	5	3	Lokupoi TC-Lokitela	20	Lore Apaangakorio	1	12	0	17.5	26.1	136	-2.53352	-1.93229	26.1	2.25268	1	0	0	0	0	0	0	0	0	0		1	0	0		0
NA_020_043	5	3	Lokupoi TC-Lokitela	20	Lore Aloibok	1	8	1	16	23.5	127	-0.624282	-0.155192	23.5	2.91696	0	0	0	0	0	0	0	0	0	0		1	0	0		0
NA_020_048	5	3	Lokupoi TC-Lokitela	20	Lore Aloibok	1	8	0	15	18.3	120	-2.45081	-1.34111	18.3	1.06509	1	0	1	0	1	0	0	0	1	0		1	0	0		0
NA_020_050	5	3	Lokupoi TC-Lokitela	20	Lore Akotol	1	10	0	19	29.4	137	-0.538681	-0.224909	29.4	3.1167	0	0	0	0	0	0	0	0	0	0		1	0	0		0
NA_020_051	5	3	Lokupoi TC-Lokitela	20	Lore Apaangakorio	1	10	1	16	24.2	130	-1.83127	-1.35689	24.2	2.53821	0	0	1	0	1	0	0	0	0	0		1	0	0		0
NA_020_054	5	3	Lokupoi TC-Lokitela	20	Lore Akotol	1	10	0	15.5	23.2	127	-2.06544	-1.79771	23.2	2.05853	1	0	1	0	1	0	0	0	0	0		1	0	0		0
NA_020_058	5	3	Lokupoi TC-Lokitela	20	Lore Alokai	1	8	0	13	15.1	112	-4.12684	-2.80281	15.1	-0.516186	2	1	0	0	0	0	0	0	0	0		1	1	0		0
NA_020_059	5	3	Lokupoi TC-Lokitela	20	Lore Aloibok	1	12	1	18	30.9	142	-1.30003	-0.884255	30.9	3.11076	0	0	0	0	0	0	0	0	0	0		1	0	0		0
NA_020_060	5	3	Lokupoi TC-Lokitela	20	Lore Akotol	1	10	0	16.5	21.3	120	-2.68385	-2.89867	21.3	1.58656	1	1	0	0	0	0	0	0	0	0		1	0	0		0
NA_020_061	5	3	Lokupoi TC-Lokitela	20	Lore Apaangakorio	1	14	1	18.5	33.8	150	-2.17184	-1.48977	33.8	3.19542	1	0	0	0	0	0	0	0	0	0		1	1	0		0
NA_020_063	5	3	Lokupoi TC-Lokitela	20	Lore Akotol	1	8	1	14.5	20	115	-1.93969	-2.34613	20	1.9885	0	1	1	0	0	0	0	0	0	1	Skin rashes	1	0	0		0
NA_020_065	5	3	Lokupoi TC-Lokitela	20	Lore Alokai	1	8	0	15	19.4	121	-1.99012	-1.1584	19.4	1.46987	0	0	0	0	0	0	0	0	0	0		1	1	0		0
NA_020_066	5	3	Lokupoi TC-Lokitela	20	Lore Akotol	1	11	0	16.5	22.2	127	-2.96146	-2.48255	22.2	1.6032	1	1	1	0	1	0	0	0	0	0		1	1	0		0
NA_020_067	5	3	Lokupoi TC-Lokitela	20	Lore Alokai	1	8	0	15	18.4	120	-2.4069	-1.34111	18.4	1.10424	1	0	0	0	0	0	0	0	0	0		1	0	0		0
NA_020_068	5	3	Lokupoi TC-Lokitela	20	Lore Apaangakorio	1	13	0	21.8	46.4	155	0.129392	-0.0404121	46.4	4.14747	0	0	0	0	0	0	0	0	0	0		1	1	0		0
NA_020_069	5	3	Lokupoi TC-Lokitela	20	Lore Apaangakorio	1	8	1	15.5	24.3	125	-0.376944	-0.520349	24.3	3.07786	0	0	0	0	0	0	0	0	0	0		1	0	0		0
NA_021_001	5	6	Kanaura	21	Not applicable	0	12	0	20.8	36.3	153	-0.569927	0.454987	36.3	3.54519	0	0	0	0	0	0	0	0	0	0		1	0	0		0
NA_021_002	5	6	Kanaura	21	Not applicable	0	11	1	17.3	30.5	142	-0.785986	-0.20603	30.5	3.2048	0	0	0	0	0	0	0	0	0	0		1	0	0		0
NA_021_003	5	6	Kanaura	21	Not applicable	0	13	0	23.2	42.5	158	-0.374782	0.392576	42.5	3.92178	0	0	0	0	0	0	0	0	0	0		1	0	0		0
NA_021_004	5	6	Kanaura	21	Not applicable	0	12	0	22.3	38.1	150	-0.303955	0.0337035	38.1	3.69231	0	0	0	0	0	0	0	0	0	0		1	0	0		0
NA_021_005	5	6	Kanaura	21	Not applicable	0	12	1	20.4	33.5	145	-0.772275	-0.467154	33.5	3.34449	0	0	1	0	1	0	0	0	0	0		1	0	0		0
NA_021_006	5	6	Kanaura	21	Not applicable	0	12	0	19.6	30.6	143	-1.55289	-0.949292	30.6	2.94512	0	0	0	0	0	0	0	0	0	0		1	0	0		0
NA_021_007	5	6	Kanaura	21	Not applicable	0	11	0	18.6	31.6	144	-0.719737	-0.0174003	31.6	3.21123	0	0	0	0	0	0	0	0	0	0		2	0	0		0
NA_021_008	5	6	Kanaura	21	Not applicable	0	10	0	19.2	29.9	133	-0.439645	-0.854029	29.9	3.18001	0	0	1	0	0	0	0	0	0	1	Mercerations in between the toes	1	0	0		0
NA_021_009	5	6	Kanaura	21	Not applicable	0	8	0	17.1	23	130	-0.761719	0.486016	23	2.48413	0	0	1	0	1	0	0	0	0	0		1	0	0		0
NA_021_010	5	6	Kanaura	21	Not applicable	0	12	0	17.9	31.2	151	-1.43758	0.174131	31.2	3.02025	0	0	0	0	0	0	0	0	0	0		1	0	0		0
NA_021_011	5	6	Kanaura	21	Not applicable	0	11	1	17.7	27.9	137	-1.4073	-0.957966	27.9	2.91414	0	0	0	0	0	0	0	0	0	0		1	0	0		0
NA_021_012	5	6	Kanaura	21	Not applicable	0	14	1	21.8	45.2	156	-0.461838	-0.76658	45.2	3.91173	0	0	0	0	0	0	0	0	0	0		1	0	0		0
NA_021_013	5	6	Kanaura	21	Not applicable	0	12	1	19.4	32.8	139	-0.906734	-1.30136	32.8	3.28664	0	0	0	0	0	0	0	0	0	0		1	0	0		0
NA_021_014	5	6	Kanaura	21	Not applicable	0	11	1	19.6	35.3	149	0.118706	0.846681	35.3	3.58965	0	0	0	0	0	0	0	0	0	0		1	0	0		0
NA_021_015	5	6	Kanaura	21	Not applicable	0	10	0	18.1	27.6	134	-0.920668	-0.696749	27.6	2.86639	0	0	0	0	0	0	0	0	0	0		1	0	0		0
NA_021_017	5	6	Kanaura	21	Not applicable	0	12	0	21.2	38.5	154	-0.247261	0.595415	38.5	3.72286	0	0	0	0	0	0	0	0	0	0		1	0	0		0
NA_021_018	5	6	Kanaura	21	Not applicable	0	10	0	18.4	27.1	133	-1.03451	-0.854029	27.1	2.78991	0	0	0	0	0	0	0	0	0	0		1	0	0		0
NA_021_019	5	6	Kanaura	21	Not applicable	0	8	0	17.6	26.7	135	0.187158	1.39958	26.7	3.20091	0	0	0	0	0	0	0	0	0	0		1	0	0		0
NA_021_021	5	6	Kanaura	21	Not applicable	0	12	0	15.4	24.2	134	-3.02284	-2.21314	24.2	1.86988	2	1	1	0	1	0	0	0	0	0		1	0	0		0
NA_021_022	5	6	Kanaura	21	Not applicable	0	12	0	20.3	39.4	152	-0.1227	0.314559	39.4	3.789	0	0	0	0	0	0	0	0	0	0		1	0	0		0
NA_021_024	5	6	Kanaura	21	Not applicable	0	12	1	16.7	25.1	132	-2.83747	-2.27459	25.1	2.32711	1	1	1	0	0	0	0	0	0	1	Wounds	1	0	0		0
NA_021_027	5	6	Kanaura	21	Not applicable	0	8	0	16.3	23.3	130	-0.674784	0.486016	23.3	2.55226	0	0	0	0	0	0	0	0	0	0		2	0	0		0
NA_021_028	5	6	Kanaura	21	Not applicable	0	12	0	17.9	31.3	150	-1.41867	0.0337035	31.3	3.03245	0	0	1	0	0	0	0	0	1	0		1	0	0		0
NA_021_029	5	6	Kanaura	21	Not applicable	0	9	0	15.6	20.1	123	-2.43492	-1.68072	20.1	1.46553	1	0	0	0	0	0	0	0	0	0		1	0	0		0
NA_021_030	5	6	Kanaura	21	Not applicable	0	9	0	16.6	22.7	128	-1.53935	-0.824955	22.7	2.16776	0	0	0	0	0	0	0	0	0	0		1	0	0		0
NA_021_031	5	6	Kanaura	21	Not applicable	0	12	0	19.6	28.8	134	-1.91897	-2.21314	28.8	2.69797	0	1	0	0	0	0	0	0	0	0		1	0	0		0
NA_021_032	5	6	Kanaura	21	Not applicable	0	12	0	18.2	25.2	135	-2.75878	-2.07272	25.2	2.07963	1	1	0	0	0	0	0	0	0	0		1	0	0		0
NA_021_035	5	6	Kanaura	21	Not applicable	0	13	1	19.5	35.9	146	-1.04441	-1.11809	35.9	3.43993	0	0	0	0	0	0	0	0	0	0		1	0	0		0
NA_021_036	5	6	Kanaura	21	Not applicable	0	9	1	13.9	17.4	117	-4.16896	-2.80737	17.4	0.728754	2	1	0	0	0	0	0	0	0	0		1	0	0		0
NA_021_037	5	6	Kanaura	21	Not applicable	0	10	0	18.8	25.4	133	-1.45028	-0.854029	25.4	2.50334	0	0	0	0	0	0	0	0	0	0		1	0	0		0
NA_021_038	5	6	Kanaura	21	Not applicable	0	8	1	16.4	19.8	123	-2.02894	-0.885506	19.8	1.92113	1	0	1	0	1	0	0	0	0	0		1	0	0		0
NA_021_040	5	6	Kanaura	21	Not applicable	0	8	0	16	25.5	138	-0.0935419	1.94772	25.5	2.99506	0	0	1	0	0	0	0	0	0	1	Wound	1	0	0		0
NA_021_041	5	6	Kanaura	21	Not applicable	0	10	0	16.4	24.7	133	-1.63574	-0.854029	24.7	2.37184	0	0	0	0	0	0	0	0	0	0		1	0	0		0
NA_021_045	5	6	Kanaura	21	Not applicable	0	9	0	17.6	26.1	121	-0.611822	-2.02302	26.1	2.84364	0	1	1	0	0	0	0	0	0	1	Cracking of feet	1	0	0		0
NA_021_046	5	6	Kanaura	21	Not applicable	0	13	1	18.2	29.5	142	-2.32129	-1.62805	29.5	2.83594	1	0	0	0	0	0	0	0	0	0		1	0	0		0
NA_021_047	5	6	Kanaura	21	Not applicable	0	8	1	14.9	21.1	119	-1.47913	-1.61582	21.1	2.32738	0	0	1	0	0	0	0	0	0	1	Wounds	1	0	0		0
NA_021_049	5	6	Kanaura	21	Not applicable	0	8	1	14.6	22.8	124	-0.854977	-0.702927	22.8	2.76294	0	0	0	0	0	0	0	0	0	0		1	0	0		0
NA_021_052	5	6	Kanaura	21	Not applicable	0	8	1	14.7	19.2	126	-2.30787	-0.33777	19.2	1.70703	1	0	0	0	0	0	0	0	0	0		1	0	0		0
NA_021_053	5	6	Kanaura	21	Not applicable	0	8	0	15.6	20.5	123	-1.57391	-0.792973	20.5	1.82422	0	0	0	0	0	0	0	0	0	0		1	0	0		0
NA_021_054	5	6	Kanaura	21	Not applicable	0	9	0	16.2	27.1	141	-0.378852	1.40002	27.1	3.00499	0	0	0	0	0	0	0	0	0	0		1	0	0		0
NA_021_056	5	6	Kanaura	21	Not applicable	0	8	0	14.8	19.2	126	-2.07037	-0.244834	19.2	1.40031	1	0	1	0	0	0	0	0	1	0		1	0	0		0
NA_021_057	5	6	Kanaura	21	Not applicable	0	9	0	16.8	20.6	117	-2.24706	-2.70763	20.6	1.6168	1	1	1	0	1	0	0	0	0	0		1	0	0		0
NA_021_058	5	6	Kanaura	21	Not applicable	0	10	0	14.1	19.5	126	-3.36441	-1.95499	19.5	1.03869	2	0	1	0	1	0	0	0	0	0		1	0	0		0
NA_021_059	5	6	Kanaura	21	Not applicable	0	9	0	15.7	23.2	129	-1.38778	-0.653803	23.2	2.28182	0	0	0	0	0	0	0	0	0	0		1	0	0		0
NA_021_060	5	6	Kanaura	21	Not applicable	0	14	1	17.2	28.7	142	-3.21373	-2.45402	28.7	2.60682	2	1	0	0	0	0	0	0	0	0		1	0	0		0
NA_021_061	5	6	Kanaura	21	Not applicable	0	8	0	15.7	19.2	118	-2.07037	-1.70654	19.2	1.40031	1	0	0	0	0	0	0	0	0	0		1	0	0		0
NA_021_062	5	6	Kanaura	21	Not applicable	0	9	1	14.4	19.2	124	-3.14288	-1.60027	19.2	1.47337	2	0	1	0	1	0	0	0	0	0		1	1	0		0
NA_021_063	5	6	Kanaura	21	Not applicable	0	9	1	14.2	19.9	124	-2.79615	-1.60027	19.9	1.71225	1	0	1	0	1	0	0	0	0	0		1	0	0		0
NA_021_064	5	6	Kanaura	21	Not applicable	0	8	1	15.4	20.5	121	-1.7242	-1.25066	20.5	2.14889	0	0	0	0	0	0	0	0	0	0		1	0	0		0
NA_021_065	5	6	Kanaura	21	Not applicable	0	10	0	18.2	28.6	141	-0.703332	0.404211	28.6	3.01	0	0	0	0	0	0	0	0	0	0		1	0	0		0
NA_021_068	5	6	Kanaura	21	Not applicable	0	8	0	17.5	25.3	128	-0.142636	0.120591	25.3	2.95852	0	0	1	0	0	0	0	0	0	1	Cracked feet	1	0	0		0
NA_021_069	5	6	Kanaura	21	Not applicable	0	11	0	15.3	20.1	125	-3.68242	-2.77256	20.1	0.997909	2	1	1	0	1	0	0	0	0	0		1	0	0		0
NA_021_071	5	6	Kanaura	21	Not applicable	0	9	0	16.9	22.8	127	-1.50856	-0.996107	22.8	2.19104	0	0	0	0	0	0	0	0	0	0		2	0	0		0
NA_021_072	5	6	Kanaura	21	Not applicable	0	8	0	15.8	19.9	122	-1.79584	-0.975685	19.9	1.63663	0	0	0	0	0	0	0	0	0	0		1	0	0		0
NA_021_073	5	6	Kanaura	21	Not applicable	0	9	0	14.2	19.7	128	-2.59132	-0.824955	19.7	1.338	1	0	0	0	0	0	0	0	0	0		1	0	0		0
NA_021_075	5	6	Kanaura	21	Not applicable	0	8	1	14.4	20.2	126	-1.85221	-0.33777	20.2	2.054	0	0	0	0	0	0	0	0	0	0		1	0	0		0
NA_021_076	5	6	Kanaura	21	Not applicable	0	8	0	18.2	26.7	129	0.187158	0.303304	26.7	3.20091	0	0	0	0	0	0	0	0	0	0		1	0	0		0
NA_021_079	5	6	Kanaura	21	Not applicable	0	9	0	16.1	19.3	112	-2.75349	-3.56339	19.3	1.20424	1	2	0	0	0	0	0	0	0	0		1	0	0		0
NA_021_080	5	6	Kanaura	21	Not applicable	0	9	1	14.8	19.9	117	-2.79615	-2.80737	19.9	1.71225	1	1	0	0	0	0	0	0	0	0		1	0	0		0
NA_021_081	5	6	Kanaura	21	Not applicable	0	8	1	15.6	21.1	118	-1.47913	-1.7984	21.1	2.32738	0	0	0	0	0	0	0	0	0	0		1	0	0		0
NA_021_082	5	6	Kanaura	21	Not applicable	0	10	1	17.7	28.1	133	-0.711358	-0.871708	28.1	3.12158	0	0	1	0	1	0	0	0	0	0		1	0	0		0
NA_021_084	5	6	Kanaura	21	Not applicable	0	8	1	15.4	18.4	115	-2.70816	-2.34613	18.4	1.39046	1	1	0	0	0	0	0	0	0	0		1	0	0		0
NA_021_086	5	6	Kanaura	21	Not applicable	0	8	0	15.3	20.1	123	-1.72055	-0.792973	20.1	1.70062	0	0	0	0	0	0	0	0	0	0		1	0	0		0
NA_021_088	5	6	Kanaura	21	Not applicable	0	10	0	17.6	22.5	125	-2.28278	-2.11227	22.5	1.89547	1	1	0	0	0	0	0	0	0	0		1	0	0		0
NA_021_089	5	6	Kanaura	21	Not applicable	0	8	0	15.4	23.4	129	-0.646249	0.303304	23.4	2.57451	0	0	0	0	0	0	0	0	0	0		1	0	0		0
NA_021_090	5	6	Kanaura	21	Not applicable	0	8	0	14.9	17.4	117	-2.86627	-1.88925	17.4	0.688877	1	0	0	0	0	0	0	0	0	0		1	0	0		0
NA_021_091	5	6	Kanaura	21	Not applicable	0	12	1	16.2	27.7	144	-2.07456	-0.606188	27.7	2.7352	1	0	0	0	0	0	0	0	0	0		1	0	0		0
NA_021_092	5	6	Kanaura	21	Not applicable	0	8	0	17.7	25.1	130	-0.192429	0.486016	25.1	2.9213	0	0	0	0	0	0	0	0	0	0		1	0	0		0
NA_021_093	5	6	Kanaura	21	Not applicable	0	8	0	16.8	19.5	121	-1.95055	-1.1584	19.5	1.50403	0	0	1	0	1	0	0	0	0	0		1	0	0		0
NA_021_095	5	6	Kanaura	21	Not applicable	0	8	0	16.4	21.6	122	-1.19584	-0.975685	21.6	2.13665	0	0	0	0	0	0	0	0	0	0		1	0	0		0
NA_021_096	5	6	Kanaura	21	Not applicable	0	8	0	15.3	20.9	125	-1.43231	-0.427547	20.9	1.9423	0	0	1	0	1	0	0	0	0	0		1	0	0		0
NA_021_097	5	6	Kanaura	21	Not applicable	0	8	0	14.9	20.9	125	-1.43231	-0.427547	20.9	1.9423	0	0	0	0	0	0	0	0	0	0		1	0	0		0
NA_021_098	5	6	Kanaura	21	Not applicable	0	8	0	15.3	21.2	120	-1.32926	-1.34111	21.2	2.02743	0	0	0	0	0	0	0	0	0	0		1	0	0		0
NA_021_099	5	6	Kanaura	21	Not applicable	0	8	0	15.4	19	114	-2.15212	-2.43739	19	1.32903	1	1	0	0	0	0	0	0	0	0		1	0	0		0
NA_021_100	5	6	Kanaura	21	Not applicable	0	8	0	15.9	19.5	115	-1.95055	-2.25467	19.5	1.50403	0	1	0	0	0	0	0	0	0	0		1	0	0		0
NA_021_101	5	6	Kanaura	21	Not applicable	0	8	0	15	19	117	-2.15212	-1.88925	19	1.32903	1	0	0	0	0	0	0	0	0	0		1	0	0		0
NA_021_102	5	6	Kanaura	21	Not applicable	0	8	0	14.8	18.4	116	-2.4069	-2.07196	18.4	1.10424	1	1	0	0	0	0	0	0	0	0		1	0	0		0
NA_021_103	5	6	Kanaura	21	Not applicable	0	8	1	15.9	20.9	119	-1.55926	-1.61582	20.9	2.26948	0	0	0	0	0	0	0	0	0	0		1	0	0		0
NA_021_105	5	6	Kanaura	21	Not applicable	0	8	0	16.9	22.6	119	-0.880839	-1.52382	22.6	2.38999	0	0	0	0	0	0	0	0	0	0		1	0	0		0
NA_021_106	5	6	Kanaura	21	Not applicable	0	8	0	13.7	18.1	114	-2.53994	-2.43739	18.1	0.985272	1	1	0	0	0	0	0	0	0	0		1	0	0		0
NA_022_001	5	6	Atedeoi	22	Not applicable	0	13	0	17.7	27.9	146	-2.97222	-1.33938	27.9	2.40572	1	0	0	0	0	0	0	0	0	0		1	0	0		0
NA_022_002	5	6	Atedeoi	22	Not applicable	0	10	0	16.6	23	133	-2.12638	-0.854029	23	2.01312	1	0	0	0	0	0	0	0	0	0		1	0	0		0
NA_022_003	5	6	Atedeoi	22	Not applicable	0	9	0	15.3	21.7	125	-1.8611	-1.33841	21.7	1.921	0	0	1	0	0	0	0	0	1	0		1	0	0		0
NA_022_004	5	6	Atedeoi	22	Not applicable	0	9	1	14.1	17.5	114	-4.10616	-3.3247	17.5	0.775926	2	2	1	0	0	0	0	0	0	0		1	0	0		0
NA_022_005	5	6	Atedeoi	22	Not applicable	0	10	0	17.4	24.5	133	-1.69041	-0.854029	24.5	2.33265	0	0	0	0	0	0	0	0	0	0		1	0	0		0
NA_022_006	5	6	Atedeoi	22	Not applicable	0	9	0	17.4	23.2	126	-1.38778	-1.16726	23.2	2.28182	0	0	1	0	1	0	0	0	0	0		1	0	0		0
NA_022_007	5	6	Atedeoi	22	Not applicable	0	13	1	18.4	29.5	136	-2.32129	-2.39299	29.5	2.83594	1	1	0	0	0	0	0	0	0	0		1	0	0		0
NA_022_008	5	6	Atedeoi	22	Not applicable	0	13	1	16.9	31.6	146	-1.8569	-1.11809	31.6	3.07144	0	0	0	0	0	0	0	0	0	0		1	0	0		0
NA_022_009	5	6	Atedeoi	22	Not applicable	0	9	1	16.2	20.5	124	-2.51863	-1.60027	20.5	1.89873	1	0	0	0	0	0	0	0	0	0		1	0	0		0
NA_022_010	5	6	Atedeoi	22	Not applicable	0	12	0	17.7	25.6	137	-2.65728	-1.79186	25.6	2.15827	1	0	1	0	1	0	0	0	0	0		1	0	0		0
NA_022_011	5	6	Atedeoi	22	Not applicable	0	12	0	17.9	26.7	134	-2.38938	-2.21314	26.7	2.36062	1	1	1	0	1	0	0	0	0	0		1	0	0		0
NA_022_012	5	6	Atedeoi	22	Not applicable	0	11	0	16.1	21.6	128	-3.15599	-2.33754	21.6	1.44417	2	1	1	0	1	0	0	0	0	0		1	0	0		0
NA_022_013	5	6	Atedeoi	22	Not applicable	0	8	0	14.6	18.6	117	-2.32034	-1.88925	18.6	1.18106	1	0	0	0	0	0	0	0	0	0		1	0	0		0
NA_022_014	5	6	Atedeoi	22	Not applicable	0	10	0	17.2	27.3	140	-0.98854	0.246931	27.3	2.82089	0	0	1	0	1	0	0	0	0	0		1	0	0		0
NA_022_015	5	6	Atedeoi	22	Not applicable	0	9	0	15.8	20	123	-2.47349	-1.68072	20	1.43421	1	0	1	0	1	0	0	0	0	0		1	0	0		0
NA_022_016	5	6	Atedeoi	22	Not applicable	0	11	0	16.7	24.7	135	-2.23344	-1.32248	24.7	2.17048	1	0	0	0	0	0	0	0	0	0		1	0	0		0
NA_022_017	5	6	Atedeoi	22	Not applicable	0	9	0	18	25.9	129	-0.660339	-0.653803	25.9	2.8096	0	0	0	0	0	0	0	0	0	0		1	0	0		0
NA_022_018	5	6	Atedeoi	22	Not applicable	0	9	0	15.6	17.8	118	-3.41918	-2.53648	17.8	0.639088	2	1	1	0	1	0	0	0	0	0		1	0	0		0
NA_022_019	5	6	Atedeoi	22	Not applicable	0	8	1	15.6	20.1	118	-1.89573	-1.7984	20.1	2.02148	0	0	0	0	0	0	0	0	0	0		1	0	0		0
NA_022_020	5	6	Atedeoi	22	Not applicable	0	8	0	15.3	20.1	123	-1.72055	-0.792973	20.1	1.70062	0	0	1	0	1	0	0	0	0	0		1	0	0		0
NA_022_021	5	6	Atedeoi	22	Not applicable	0	9	1	15.2	20.3	122	-2.60923	-1.94516	20.3	1.83831	1	0	0	0	0	0	0	0	0	0		1	0	0		0
NA_022_022	5	6	Atedeoi	22	Not applicable	0	10	0	15.9	23.7	133	-1.917	-0.854029	23.7	2.16812	0	0	1	0	1	0	0	0	0	0		1	0	0		0
NA_022_023	5	6	Atedeoi	22	Not applicable	0	10	1	19	34	150	0.474946	1.87765	34	3.66534	0	0	0	0	0	0	0	0	0	0		1	0	0		0
NA_022_024	5	6	Atedeoi	22	Not applicable	0	8	0	16.9	23.7	128	-0.561938	0.120591	23.7	2.63996	0	0	0	0	0	0	0	0	0	0		1	0	0		0
NA_022_025	5	6	Atedeoi	22	Not applicable	0	10	1	17.3	28.6	137	-0.590872	-0.2248	28.6	3.18036	0	0	0	0	0	0	0	0	0	0		1	0	0		0
NA_022_026	5	6	Atedeoi	22	Not applicable	0	13	1	18.8	37.2	152	-0.828723	-0.353148	37.2	3.52883	0	0	0	0	0	0	0	0	0	0		1	0	0		0
NA_022_027	5	6	Atedeoi	22	Not applicable	0	10	0	16.4	21.3	134	-2.68385	-0.696749	21.3	1.58656	1	0	0	0	0	0	0	0	0	0		1	0	0		0
NA_022_028	5	6	Atedeoi	22	Not applicable	0	11	0	18.6	26.8	136	-1.70721	-1.17747	26.8	2.55335	0	0	1	0	0	0	0	0	0	1	Wounds	1	0	0		0
NA_022_029	5	6	Atedeoi	22	Not applicable	0	12	0	17	26.8	134	-2.3658	-2.21314	26.8	2.37806	1	1	0	0	0	0	0	0	0	0		1	0	0		0
NA_022_030	5	6	Atedeoi	22	Not applicable	0	10	0	15.7	19.9	119	-3.20402	-3.05595	19.9	1.17048	2	2	0	0	0	0	0	0	0	0		1	0	0		0
NA_022_031	5	6	Atedeoi	22	Not applicable	0	12	1	19.1	34.9	144	-0.518378	-0.606188	34.9	3.45059	0	0	0	0	0	0	0	0	0	0		1	0	0		0
NA_022_032	5	6	Atedeoi	22	Not applicable	0	11	1	18.7	34.9	144	0.052902	0.0947447	34.9	3.56322	0	0	0	0	0	0	0	0	0	0		1	0	0		0
NA_022_033	5	6	Atedeoi	22	Not applicable	0	8	0	15.7	19.6	118	-1.91134	-1.70654	19.6	1.53777	0	0	0	0	0	0	0	0	0	0		1	0	0		0
NA_022_034	5	6	Atedeoi	22	Not applicable	0	8	0	18.8	30.9	140	1.01426	2.31314	30.9	3.77652	0	0	0	0	0	0	0	0	0	0		1	0	0		0
NA_022_035	5	6	Atedeoi	22	Not applicable	0	13	1	17.9	32.2	148	-1.73318	-0.863109	32.2	3.13107	0	0	1	0	1	0	0	0	1	0		1	0	0		0
NA_022_036	5	6	Atedeoi	22	Not applicable	0	8	0	17.2	24.2	128	-0.425583	0.120591	24.2	2.74482	0	0	0	0	0	0	0	0	0	0		1	0	0		0
NA_022_037	5	6	Atedeoi	22	Not applicable	0	10	1	17.8	28.2	137	-0.686903	-0.2248	28.2	3.13357	0	0	1	0	1	0	0	0	0	1	Wounds	1	0	0		0
NA_022_038	5	6	Atedeoi	22	Not applicable	0	12	1	18.1	33.4	146	-0.791164	-0.32812	33.4	3.33643	0	0	1	0	1	0	0	0	0	0		1	0	0		0
NA_022_039	5	6	Atedeoi	22	Not applicable	0	12	1	16.4	25.4	132	-2.74208	-2.27459	25.4	2.38023	1	1	1	0	0	0	1	0	0	0		1	0	0		0
NA_022_040	5	6	Atedeoi	22	Not applicable	0	10	1	16.8	27.4	136	-0.887793	-0.386527	27.4	3.03408	0	0	1	0	1	0	0	0	0	0		1	0	0		0
NA_022_041	5	6	Atedeoi	22	Not applicable	0	13	1	16.1	26.5	138	-3.08481	-2.13801	26.5	2.40715	2	1	0	0	0	0	0	0	0	0		1	0	0		0
NA_022_042	5	6	Atedeoi	22	Not applicable	0	14	1	18.3	31.3	140	-2.65387	-2.69508	31.3	2.93915	1	1	1	0	0	0	1	0	0	0		1	0	1		0
NA_022_043	5	6	Atedeoi	22	Not applicable	0	8	0	15.6	18.7	118	-2.27768	-1.70654	18.7	1.21875	1	0	0	0	0	0	0	0	0	0		1	0	0		0
NA_022_044	5	6	Atedeoi	22	Not applicable	0	12	0	18.9	31.8	144	-1.32537	-0.808864	31.8	3.09212	0	0	0	0	0	0	0	0	0	0		1	0	0		0
NA_022_046	5	6	Atedeoi	22	Not applicable	0	10	1	16.2	26.8	133	-1.04672	-0.871708	26.8	2.95384	0	0	0	0	0	0	0	0	0	0		1	0	0		0
NA_022_047	5	6	Atedeoi	22	Not applicable	0	14	1	21.3	42.3	156	-0.836767	-0.76658	42.3	3.77792	0	0	0	0	0	0	0	0	0	0		1	0	0		0
NA_022_048	5	6	Atedeoi	22	Not applicable	0	10	1	16.6	27.4	139	-0.887793	0.0986535	27.4	3.03408	0	0	0	0	0	0	0	0	0	0		1	0	0		0
NA_023_001	11	1	Kotipe	23	Not applicable	0	10	0	17.4	26.5	133	-1.17599	-0.854029	26.5	2.69367	0	0	0	0	0	0	0	0	0	0		1	0	0		0
NA_023_002	11	1	Kotipe	23	Not applicable	0	10	0	16.4	25.4	141	-1.45028	0.404211	25.4	2.50334	0	0	0	0	0	0	0	0	0	0		1	0	0		0
NA_023_003	11	1	Kotipe	23	Not applicable	0	9	0	17.2	25.9	136	-0.660339	0.544263	25.9	2.8096	0	0	0	0	0	0	0	0	0	0		1	0	0		0
NA_023_004	11	1	Kotipe	23	Not applicable	0	11	0	19.1	30.1	144	-1.00118	-0.0174003	30.1	3.03171	0	0	0	0	0	0	0	0	0	0		1	0	0		0
NA_023_006	11	1	Kotipe	23	Not applicable	0	8	0	16.3	24.5	129	-0.346163	0.303304	24.5	2.80533	0	0	0	0	0	0	0	0	0	0		1	0	0		0
NA_023_007	11	1	Kotipe	23	Not applicable	0	8	0	15.4	20.1	125	-1.72055	-0.427547	20.1	1.70062	0	0	1	0	1	0	0	0	0	0		1	0	0		0
NA_023_008	11	1	Kotipe	23	Not applicable	0	9	0	15.8	20.8	126	-2.17418	-1.16726	20.8	1.67493	1	0	1	0	1	0	0	0	0	0		1	0	0		0
NA_023_009	11	1	Kotipe	23	Not applicable	0	12	1	18.7	32.5	149	-0.965999	0.0889816	32.5	3.26077	0	0	0	0	0	0	0	0	0	0		1	0	0		0
NA_023_010	11	1	Kotipe	23	Not applicable	0	9	0	17.6	29.4	139	0.102921	1.05772	29.4	3.32776	0	0	0	0	0	0	0	0	0	0		1	0	0		0
NA_023_012	11	1	Kotipe	23	Not applicable	0	10	0	18.4	28.7	137	-0.682318	-0.224909	28.7	3.02371	0	0	0	0	0	0	0	0	0	0		1	0	0		0
NA_023_013	11	1	Kotipe	23	Not applicable	0	8	0	14.9	20	125	-1.75802	-0.427547	20	1.66882	0	0	0	0	0	0	0	0	0	0		1	0	0		0
NA_023_014	11	1	Kotipe	23	Not applicable	0	12	1	17.2	28.2	145	-1.94283	-0.467154	28.2	2.80182	0	0	0	0	0	0	0	0	0	0		1	0	0		0
NA_023_015	11	1	Kotipe	23	Not applicable	0	12	1	16.3	28.7	142	-1.81535	-0.884255	28.7	2.86521	0	0	0	0	0	0	0	0	0	0		1	0	0		0
NA_023_016	11	1	Kotipe	23	Not applicable	0	11	1	17.7	28.7	141	-1.20403	-0.356417	28.7	3.01157	0	0	1	0	0	0	0	0	0	1	wounds	1	0	0		0
NA_023_017	11	1	Kotipe	23	Not applicable	0	13	0	20.9	35.9	148	-1.37958	-1.05072	35.9	3.40973	0	0	0	0	0	0	0	0	0	0		1	0	0		0
NA_023_019	11	1	Kotipe	23	Not applicable	0	12	0	17.5	29.5	146	-1.77284	-0.528008	29.5	2.79821	0	0	1	0	0	0	0	0	1	0		1	0	0		0
NA_023_020	11	1	Kotipe	23	Not applicable	0	8	1	15.4	20	117	-1.93969	-1.98098	20	1.9885	0	0	0	0	0	0	0	0	0	0		1	0	0		0
NA_023_021	11	1	Kotipe	23	Not applicable	0	8	0	14.4	18.5	122	-2.36341	-0.975685	18.5	1.14289	1	0	0	0	0	0	0	0	0	0		1	0	0		0
NA_023_022	11	1	Kotipe	23	Not applicable	0	12	0	18.4	35.3	151	-0.725914	0.174131	35.3	3.45595	0	0	0	0	0	0	0	0	0	0		1	0	0		0
NA_023_023	11	1	Kotipe	23	Not applicable	0	13	0	17.8	34.8	154	-1.57012	-0.184741	34.8	3.30261	0	0	0	0	0	0	0	0	0	0		1	0	0		0
NA_023_024	11	1	Kotipe	23	Not applicable	0	12	0	19.4	36	153	-0.616077	0.454987	36	3.51901	0	0	0	0	0	0	0	0	0	0		1	0	0		0
NA_023_025	11	1	Kotipe	23	Not applicable	0	12	0	17.4	26.5	140	-2.43691	-1.37058	26.5	2.32526	1	0	0	0	0	0	0	0	0	0		1	0	0		0
NA_023_026	11	1	Kotipe	23	Not applicable	0	9	0	17.1	28.4	138	-0.097984	0.886567	28.4	3.19497	0	0	0	0	0	0	0	0	0	0		1	0	0		0
NA_023_027	11	1	Kotipe	23	Not applicable	0	13	0	18.6	33.3	150	-1.84276	-0.762059	33.3	3.14346	0	0	1	0	0	0	0	0	0	1	Wounds	1	1	0		0
NA_023_028	11	1	Kotipe	23	Not applicable	0	13	0	19.9	36.2	152	-1.32891	-0.4734	36.2	3.43765	0	0	0	0	0	0	0	0	0	0		1	0	0		0
NA_023_029	11	1	Kotipe	23	Not applicable	0	14	0	21.6	41.4	161	-1.20931	0.212408	41.4	3.78931	0	0	0	0	0	0	0	0	0	0		1	0	0		0
NA_023_030	11	1	Kotipe	23	Not applicable	0	12	0	18.1	33.4	144	-1.04029	-0.808864	33.4	3.26934	0	0	0	0	0	0	0	0	0	0		1	0	0		0
NA_023_031	11	1	Kotipe	23	Not applicable	0	14	0	22	42.2	154	-1.08438	-0.857273	42.2	3.84573	0	0	0	0	0	0	0	0	0	0		1	0	0		0
NA_023_032	11	1	Kotipe	23	Not applicable	0	14	0	21.1	40.5	155	-1.35362	-0.704461	40.5	3.72283	0	0	1	0	0	0	0	0	0	1	Wounds	1	0	0		0
NA_023_033	11	1	Kotipe	23	Not applicable	0	14	0	22.9	49.9	163	-0.0188709	0.518031	49.9	4.28567	0	0	1	0	0	0	0	0	0	1	Wounds	1	0	0		0
NA_023_034	11	1	Kotipe	23	Not applicable	0	12	0	18.4	33	150	-1.10972	0.0337035	33	3.22688	0	0	1	0	0	0	0	0	0	1	Wounds	1	0	0		0
NA_023_035	11	1	Kotipe	23	Not applicable	0	14	0	21.9	41.7	155	-1.1621	-0.704461	41.7	3.81075	0	0	0	0	0	0	0	0	0	0		1	0	0		0
NA_023_036	11	1	Kotipe	23	Not applicable	0	8	1	14.7	21.2	121	-1.43964	-1.25066	21.2	2.35575	0	0	0	0	0	0	0	0	0	0		1	0	0		0
NA_023_037	11	1	Kotipe	23	Not applicable	0	10	1	16.3	26.5	136	-1.12902	-0.386527	26.5	2.91176	0	0	1	0	0	0	0	0	0	1	Wounds	1	0	0		0
NA_023_038	11	1	Kotipe	23	Not applicable	0	10	0	20.2	35	145	0.429067	1.03333	35	3.70709	0	0	0	0	0	0	0	0	0	0		1	0	0		0
NA_023_039	11	1	Kotipe	23	Not applicable	0	10	1	16.9	26.5	133	-1.12902	-0.871708	26.5	2.91176	0	0	0	0	0	0	0	0	0	0		1	0	0		0
NA_023_040	11	1	Kotipe	23	Not applicable	0	10	0	16.6	23.8	131	-1.88796	-1.16859	23.8	2.1894	0	0	0	0	0	0	0	0	0	0		1	0	0		0
NA_023_041	11	1	Kotipe	23	Not applicable	0	9	0	15.7	24.8	132	-0.939624	-0.140346	24.8	2.61084	0	0	1	0	0	0	0	0	0	1	Wounds	1	0	0		0
NA_023_042	11	1	Kotipe	23	Not applicable	0	11	0	17.3	29.1	148	-1.20158	0.562634	29.1	2.90002	0	0	0	0	0	0	0	0	0	0		1	0	0		0
NA_023_043	11	1	Kotipe	23	Not applicable	0	8	0	17.6	25.6	129	-0.0692524	0.303304	25.6	3.01308	0	0	0	0	0	0	0	0	0	0		1	0	0		0
NA_023_044	11	1	Kotipe	23	Not applicable	0	8	1	15.6	20.4	117	-1.76645	-1.98098	20.4	2.1177	0	0	1	0	1	0	0	0	0	1	Wounds	1	0	0		0
NA_023_046	11	1	Kotipe	23	Not applicable	0	8	0	14.9	19.4	120	-1.99012	-1.34111	19.4	1.46987	0	0	0	0	0	0	0	0	0	0		1	0	0		0
NA_023_047	11	1	Kotipe	23	Not applicable	0	11	1	16.8	26.7	140	-1.73527	-0.506804	26.7	2.75222	0	0	0	0	0	0	0	0	0	0		1	0	0		0
NA_023_048	11	1	Kotipe	23	Not applicable	0	8	1	13.5	17.4	116	-3.26041	-2.16356	17.4	0.935828	2	1	1	0	0	0	0	0	0	1	Wound	1	0	0		0
NA_023_049	11	1	Kotipe	23	Not applicable	0	10	0	19.6	31.5	141	-0.141051	0.404211	31.5	3.36691	0	0	0	0	0	0	0	0	0	0		1	0	0		0
NA_023_050	11	1	Kotipe	23	Not applicable	0	9	1	15.8	22.8	130	-1.59585	-0.565613	22.8	2.48804	0	0	0	0	0	0	0	0	0	0		1	0	0		0
NA_023_053	11	1	Kotipe	23	Not applicable	0	11	1	16.6	22.8	128	-3.04199	-2.31145	22.8	2.0499	2	1	0	0	1	0	0	0	1	0		1	0	0		0
NA_023_054	11	1	Kotipe	23	Not applicable	0	9	0	16.3	23.4	132	-1.32877	-0.140346	23.4	2.32584	0	0	1	0	0	0	0	0	0	1	Wound	1	0	0		0
NA_023_055	11	1	Kotipe	23	Not applicable	0	8	0	18.3	25.3	123	-0.142636	-0.792973	25.3	2.95852	0	0	1	0	0	0	0	0	1	0		1	0	0		0
NA_023_056	11	1	Kotipe	23	Not applicable	0	8	0	16.8	24	132	-0.479515	0.851442	24	2.70349	0	0	0	0	0	0	0	0	0	0		1	0	0		0
NA_023_057	11	1	Kotipe	23	Not applicable	0	12	1	18.9	34.9	150	-0.518378	0.228015	34.9	3.45059	0	0	0	0	0	0	0	0	0	0		1	0	0		0
NA_023_058	11	1	Kotipe	23	Not applicable	0	12	1	19.6	35.9	146	-0.348277	-0.32812	35.9	3.51937	0	0	0	0	0	0	0	0	0	0		1	0	0		0
NA_023_060	11	1	Kotipe	23	Not applicable	0	11	1	14.1	21.9	130	-3.41028	-2.01068	21.9	1.83571	2	1	1	0	0	0	0	0	0	1	Dandruff	1	0	0		0
NA_023_061	11	1	Kotipe	23	Not applicable	0	8	1	14.6	20.9	123	-1.55926	-0.885506	20.9	2.26948	0	0	0	0	0	0	0	0	0	0		1	0	0		0
NA_023_062	11	1	Kotipe	23	Not applicable	0	8	1	15.3	18.2	116	-2.81374	-2.16356	18.2	1.30514	1	1	1	0	1	0	0	0	0	0		1	0	0		0
NA_023_063	11	1	Kotipe	23	Not applicable	0	11	1	16.5	26.1	138	-1.91066	-0.807579	26.1	2.66324	0	0	1	0	0	0	0	0	0	1	wounds	1	0	0		0
NA_023_064	11	1	Kotipe	23	Not applicable	0	10	1	16.6	26.1	131	-1.24184	-1.19516	26.1	2.85349	0	0	0	0	0	0	0	0	0	0		1	0	0		0
NA_023_065	11	1	Kotipe	23	Not applicable	0	9	1	15.8	23.9	125	-1.22	-1.42783	23.9	2.71425	0	0	0	0	0	0	0	0	0	0		1	0	0		0
NA_023_066	11	1	Kotipe	23	Not applicable	0	9	1	15.4	23.6	127	-1.31887	-1.08294	23.6	2.65553	0	0	0	0	0	0	0	0	0	0		1	0	0		0
NA_023_068	11	1	Kotipe	23	Not applicable	0	11	0	17.6	31.3	147	-0.7743	0.417626	31.3	3.17692	0	0	0	0	0	0	0	0	0	0		1	0	0		0
NA_023_069	11	1	Kotipe	23	Not applicable	0	10	0	16.8	27.6	132	-0.920668	-1.01131	27.6	2.86639	0	0	0	0	0	0	0	0	0	0		1	0	0		0
NA_023_070	11	1	Kotipe	23	Not applicable	0	11	1	17.6	29.7	143	-0.965471	-0.0556425	29.7	3.12302	0	0	0	0	0	0	0	0	0	0		1	0	0		0
NA_024_001	5	6	Natirae A	24	Not applicable	0	12	1	17.5	30.1	144	-1.47935	-0.606188	30.1	3.02726	0	0	0	0	0	0	0	0	0	0		1	0	0		0
NA_024_002	5	6	Natirae A	24	Not applicable	0	8	1	16.9	25.1	128	-0.145411	0.0273871	25.1	3.22451	0	0	0	0	0	0	0	0	0	0		1	0	0		0
NA_024_003	5	6	Natirae A	24	Not applicable	0	13	1	19.1	32.4	139	-1.69275	-2.01052	32.4	3.15028	0	1	0	0	0	0	0	0	0	0		1	0	0		0
NA_024_004	5	6	Natirae A	24	Not applicable	0	9	0	17.5	25.3	131	-0.809989	-0.311498	25.3	2.7037	0	0	0	0	0	0	0	0	0	0		1	0	0		0
NA_024_005	5	6	Natirae A	24	Not applicable	0	8	0	15.2	23.5	120	-0.617932	-1.34111	23.5	2.59655	0	0	0	0	0	0	0	0	0	0		1	0	0		0
NA_024_006	5	6	Natirae A	24	Not applicable	0	8	1	15.6	20.4	113	-1.76645	-2.71129	20.4	2.1177	0	1	0	0	0	0	0	0	0	0		1	0	0		0
NA_024_007	5	6	Natirae A	24	Not applicable	0	9	0	18.7	30	138	0.217711	0.886567	30	3.40248	0	0	0	0	0	0	0	0	0	0		1	0	0		0
NA_024_008	5	6	Natirae A	24	Not applicable	0	12	0	16.5	24	127	-3.07751	-3.19614	24	1.82551	2	2	0	0	0	0	0	0	0	0		1	0	0		0
NA_024_009	5	6	Natirae A	24	Not applicable	0	12	0	18.9	29.7	137	-1.73199	-1.79186	29.7	2.82586	0	0	0	0	0	0	0	0	0	0		1	0	0		0
NA_024_010	5	6	Natirae A	24	Not applicable	0	8	0	15.5	21.8	125	-1.13077	-0.427547	21.8	2.1895	0	0	0	0	0	0	0	0	0	0		1	0	0		0
NA_024_011	5	6	Natirae A	24	Not applicable	0	8	0	16	21.8	124	-1.13077	-0.61026	21.8	2.1895	0	0	0	0	0	0	0	0	0	0		1	0	0		0
NA_024_012	5	6	Natirae A	24	Not applicable	0	9	0	17.3	25.5	134	-0.759408	0.201958	25.5	2.73966	0	0	1	0	1	0	0	0	0	0		1	0	0		0
NA_024_013	5	6	Natirae A	24	Not applicable	0	8	1	16.6	24.6	127	-0.28835	-0.155192	24.6	3.13443	0	0	0	0	0	0	0	0	0	0		1	0	0		0
NA_024_014	5	6	Natirae A	24	Not applicable	0	8	0	16.4	23	124	-0.761719	-0.61026	23	2.48413	0	0	0	0	0	0	0	0	0	0		1	0	0		0
NA_024_015	5	6	Natirae A	24	Not applicable	0	8	0	16	19.5	115	-1.95055	-2.25467	19.5	1.50403	0	1	0	0	0	0	0	0	0	0		1	0	0		0
NA_024_016	5	6	Natirae A	24	Not applicable	0	9	0	16.1	25.2	135	-0.835549	0.373111	25.2	2.68548	0	0	0	0	0	0	0	0	0	0		1	0	0		0
NA_024_017	5	6	Natirae A	24	Not applicable	0	9	1	16.1	23	125	-1.52472	-1.42783	23	2.53148	0	0	0	0	0	0	0	0	0	0		1	0	0		0
NA_024_018	5	6	Natirae A	24	Not applicable	0	11	0	17.1	27.4	141	-1.56879	-0.452426	27.4	2.65032	0	0	0	0	0	0	0	0	0	0		1	0	0		0
NA_024_019	5	6	Natirae A	24	Not applicable	0	13	0	19.1	31.1	140	-2.27243	-2.20535	31.1	2.8781	1	1	0	0	0	0	0	0	0	0		1	0	0		0
NA_024_020	5	6	Natirae A	24	Not applicable	0	8	1	16.2	24.8	131	-0.230481	0.575123	24.8	3.17108	0	0	1	0	1	0	0	0	0	0		1	0	0		0
NA_024_021	5	6	Natirae A	24	Not applicable	0	12	0	16.4	25.6	137	-2.65728	-1.79186	25.6	2.15827	1	0	0	0	0	0	0	0	0	0		1	0	0		0
NA_024_022	5	6	Natirae A	24	Not applicable	0	11	1	16.3	27.8	132	-1.43354	-1.7099	27.8	2.9014	0	0	1	0	1	0	0	0	0	0		1	0	0		0
NA_024_023	5	6	Natirae A	24	Not applicable	0	8	0	15.6	21.5	127	-1.22878	-0.0621217	21.5	2.10979	0	0	0	0	0	0	0	0	0	0		1	0	0		0
NA_024_024	5	6	Natirae A	24	Not applicable	0	13	0	19.4	35.9	152	-1.37958	-0.4734	35.9	3.40973	0	0	0	0	0	0	0	0	0	0		1	0	0		0
NA_024_025	5	6	Natirae A	24	Not applicable	0	13	0	17.9	30	141	-2.50215	-2.06102	30	2.72866	1	1	0	0	0	0	0	0	0	0		1	0	0		0
NA_024_026	5	6	Natirae A	24	Not applicable	0	8	0	18.1	22.2	117	-1.00379	-1.88925	22.2	2.29186	0	0	0	0	0	0	0	0	0	0		1	0	0		0
NA_024_027	5	6	Natirae A	24	Not applicable	0	9	1	15.1	23.2	122	-1.45487	-1.94516	23.2	2.57385	0	0	0	0	0	0	0	0	0	0		1	0	0		0
NA_024_028	5	6	Natirae A	24	Not applicable	0	12	0	19.1	29.9	133	-1.69153	-2.35357	29.9	2.85308	0	1	0	0	0	0	0	0	0	0		2	0	0		0
NA_024_029	5	6	Natirae A	24	Not applicable	0	8	1	14.1	20	122	-1.93969	-1.06808	20	1.9885	0	0	0	0	0	0	0	0	0	0		1	0	0		0
NA_024_030	5	6	Natirae A	24	Not applicable	0	10	0	16.7	29.9	147	-0.439645	1.34789	29.9	3.18001	0	0	0	0	0	0	0	0	0	0		1	0	0		0
NA_024_031	5	6	Natirae A	24	Not applicable	0	8	0	14.6	18.3	116	-2.45081	-2.07196	18.3	1.06509	1	1	0	0	0	0	0	0	0	0		1	0	0		0
NA_024_032	5	6	Natirae A	24	Not applicable	0	8	1	15.1	20	114	-1.93969	-2.52871	20	1.9885	0	1	0	0	0	0	0	0	0	0		1	0	0		0
NA_024_033	5	6	Natirae A	24	Not applicable	0	8	1	15.9	23.4	123	-0.656391	-0.885506	23.4	2.89575	0	0	0	0	0	0	0	0	0	0		1	0	0		0
NA_024_034	5	6	Natirae A	24	Not applicable	0	10	0	15.9	26.6	140	-1.15203	0.246931	26.6	2.71007	0	0	0	0	0	0	0	0	0	0		1	0	0		0
NA_024_035	5	6	Natirae A	24	Not applicable	0	12	0	18.6	32.1	145	-1.27039	-0.668436	32.1	3.1269	0	0	0	0	0	0	0	0	0	0		1	0	0		0
NA_024_036	5	6	Natirae A	24	Not applicable	0	10	1	19.1	32.8	142	0.269843	0.583834	32.8	3.57698	0	0	0	0	0	0	0	0	0	0		1	0	0		0
NA_024_037	5	6	Natirae A	24	Not applicable	0	10	1	17.8	32.8	146	0.269843	1.23074	32.8	3.57698	0	0	0	0	0	0	0	0	0	0		1	0	0		0
NA_024_038	5	6	Natirae A	24	Not applicable	0	13	1	19.6	34.9	144	-1.21901	-1.37307	34.9	3.36527	0	0	0	0	0	0	0	0	0	0		1	0	0		0
NA_024_039	5	6	Natirae A	24	Not applicable	0	8	1	14.8	19.5	118	-2.16626	-1.7984	19.5	1.8164	1	0	1	0	1	0	0	0	0	0		1	0	0		0
NA_024_040	5	6	Natirae A	24	Not applicable	0	8	0	15.9	21.4	127	-1.26199	-0.0621217	21.4	2.08264	0	0	0	0	0	0	0	0	0	0		1	0	0		0
NA_024_041	5	6	Natirae A	24	Not applicable	0	9	0	15.6	20.9	121	-2.13821	-2.02302	20.9	1.7035	1	1	0	0	0	0	0	0	0	0		1	0	0		0
NA_024_042	5	6	Natirae A	24	Not applicable	0	8	0	14.6	19	123	-2.15212	-0.792973	19	1.32903	1	0	0	0	0	0	0	0	0	0		1	0	0		0
NA_024_043	5	6	Natirae A	24	Not applicable	0	8	0	13.7	17.8	116	-2.67699	-2.07196	17.8	0.86159	1	1	0	0	0	0	0	0	0	0		1	0	0		0
NA_024_044	5	6	Natirae A	24	Not applicable	0	8	0	14.3	20	119	-1.75802	-1.52382	20	1.66882	0	0	0	0	0	0	0	0	0	0		1	0	0		0
NA_024_045	5	6	Natirae A	24	Not applicable	0	9	0	14.8	21.8	127	-1.82774	-0.996107	21.8	1.94688	0	0	1	0	1	0	0	0	0	0		1	0	0		0
NA_024_046	5	6	Natirae A	24	Not applicable	0	9	0	17.7	25.6	133	-0.734382	0.0308061	25.6	2.75738	0	0	1	0	1	0	0	0	1	0		1	0	0		0
NA_024_047	5	6	Natirae A	24	Not applicable	0	8	1	17.2	20	116	-1.93969	-2.16356	20	1.9885	0	1	0	0	0	0	0	0	0	0		1	0	0		0
NA_024_048	5	6	Natirae A	24	Not applicable	0	11	1	16.8	28.1	138	-1.35539	-0.807579	28.1	2.93924	0	0	0	0	0	0	0	0	0	0		1	0	0		0
NA_024_049	5	6	Natirae A	24	Not applicable	0	8	0	15.4	19.4	122	-1.99012	-0.975685	19.4	1.46987	0	0	1	0	1	0	0	0	0	0		1	0	0		0
NA_024_050	5	6	Natirae A	24	Not applicable	0	14	1	18.3	37.7	153	-1.50881	-1.12817	37.7	3.50663	0	0	0	0	0	0	0	0	0	0		1	0	0		0
NA_025_001	5	6	Natirae B	25	Not applicable	0	10	1	17.2	32.4	143	0.197932	0.745561	32.4	3.54544	0	0	1	0	1	0	0	0	0	0		1	0	0		0
NA_025_002	5	6	Natirae B	25	Not applicable	0	10	1	16.1	29.6	136	-0.362686	-0.386527	29.6	3.28951	0	0	1	0	1	0	0	0	0	0		1	0	0		0
NA_025_003	5	6	Natirae B	25	Not applicable	0	10	1	15.6	26.5	135	-1.12902	-0.548254	26.5	2.91176	0	0	0	0	0	0	0	0	0	0		1	0	0		0
NA_025_004	5	6	Natirae B	25	Not applicable	0	8	1	14.8	23.9	125	-0.498538	-0.520349	23.9	2.99931	0	0	0	0	0	0	0	0	0	0		1	0	0		0
NA_025_005	5	6	Natirae B	25	Not applicable	0	14	1	19.2	42.5	160	-0.809807	-0.284454	42.5	3.78794	0	0	1	0	1	0	0	0	0	1	Several Wounds	1	0	0		0
NA_025_006	5	6	Natirae B	25	Not applicable	0	10	1	17.7	32.8	144	0.269843	0.907288	32.8	3.57698	0	0	0	0	0	0	0	0	0	0		1	0	0		0
NA_025_007	5	6	Natirae B	25	Not applicable	0	8	1	16.4	24.4	124	-0.34717	-0.702927	24.4	3.09694	0	0	1	0	1	0	0	0	0	0		1	0	0		0
NA_025_008	5	6	Natirae B	25	Not applicable	0	8	1	15.1	28	135	0.582733	1.30544	28	3.66033	0	0	1	0	0	0	0	0	0	1	Wound	1	0	0		0
NA_025_009	5	6	Natirae B	25	Not applicable	0	8	1	15.8	23.7	120	-0.560878	-1.43324	23.7	2.95862	0	0	0	0	0	0	0	0	0	0		1	0	0		0
NA_025_010	5	6	Natirae B	25	Not applicable	0	12	1	19.5	41.3	148	0.43749	-0.0500523	41.3	3.81333	0	0	1	0	1	0	0	0	0	0		1	0	0		0
NA_025_011	5	6	Natirae B	25	Not applicable	0	10	1	19.4	34.3	146	0.523872	1.23074	34.3	3.68606	0	0	0	0	0	0	0	0	0	0		1	0	0		0
NA_025_012	5	6	Natirae B	25	Not applicable	0	14	0	21.4	47.6	163	-0.313754	0.518031	47.6	4.17105	0	0	1	0	0	0	0	0	0	1	Wounds	1	0	0		0
NA_025_013	5	6	Natirae B	25	Not applicable	0	14	0	19.9	48.2	161	-0.23509	0.212408	48.2	4.20215	0	0	0	0	0	0	0	0	0	0		1	0	0		0
NA_025_014	5	6	Natirae B	25	Not applicable	0	12	1	15.5	29.9	141	-1.52556	-1.02329	29.9	3.00541	0	0	0	0	0	0	0	0	0	0		1	0	0		0
NA_025_015	5	6	Natirae B	25	Not applicable	0	10	1	14.7	23.1	130	-2.21911	-1.35689	23.1	2.32097	1	0	0	0	0	0	0	0	0	0		1	0	0		0
NA_025_016	5	6	Natirae B	25	Not applicable	0	10	1	15.9	25.3	128	-1.47871	-1.68034	25.3	2.72897	0	0	0	0	0	0	0	0	0	0		1	0	0		0
NA_025_017	5	6	Natirae B	25	Not applicable	0	11	1	17.1	29.9	138	-0.919692	-0.807579	29.9	3.14404	0	0	0	0	0	0	0	0	0	0		1	0	0		0
NA_025_018	5	6	Natirae B	25	Not applicable	0	10	1	18.4	31.9	147	0.105382	1.39247	31.9	3.5044	0	0	1	0	1	0	0	0	1	0		1	0	0		0
NA_025_019	5	6	Natirae B	25	Not applicable	0	10	0	18.9	30	138	-0.42018	-0.0676292	30	3.19238	0	0	0	0	0	0	0	0	0	0		1	0	0		0
NA_025_020	5	6	Natirae B	25	Not applicable	0	10	1	14.8	22.4	129	-2.48675	-1.51862	22.4	2.16661	1	0	1	0	1	0	0	0	0	0		1	0	0		0
NA_025_021	5	6	Natirae B	25	Not applicable	0	13	0	20.1	36.1	145	-1.34574	-1.48371	36.1	3.4284	0	0	0	0	0	0	0	0	0	0		1	0	0		0
NA_025_022	5	6	Natirae B	25	Not applicable	0	9	0	16.3	27.1	136	-0.378852	0.544263	27.1	3.00499	0	0	0	0	0	0	0	0	0	0		1	0	0		0
NA_025_023	5	6	Natirae B	25	Not applicable	0	10	0	17.2	27.6	137	-0.920668	-0.224909	27.6	2.86639	0	0	0	0	0	0	0	0	0	0		1	0	0		0
NA_025_024	5	6	Natirae B	25	Not applicable	0	8	0	14.6	20.6	122	-1.53805	-0.975685	20.6	1.85424	0	0	1	0	1	0	0	0	0	0		1	0	0		0
NA_025_025	5	6	Natirae B	25	Not applicable	0	9	0	16.1	21.9	129	-1.79466	-0.653803	21.9	1.97247	0	0	0	0	0	0	0	0	0	0		1	0	0		0
NA_025_026	5	6	Natirae B	25	Not applicable	0	8	0	15.3	21.3	123	-1.29548	-0.792973	21.3	2.05519	0	0	0	0	0	0	0	0	0	0		1	0	0		0
NA_025_027	5	6	Natirae B	25	Not applicable	0	8	0	15.6	21.3	124	-1.29548	-0.61026	21.3	2.05519	0	0	0	0	0	0	0	0	0	0		1	0	0		0
NA_025_028	5	6	Natirae B	25	Not applicable	0	9	0	27.6	29.2	139	0.0637234	1.05772	29.2	3.30206	0	0	0	0	0	0	0	0	0	0		1	0	0		0
NA_025_029	5	6	Natirae B	25	Not applicable	0	13	0	19.4	34.4	151	-1.64133	-0.61773	34.4	3.26172	0	0	0	0	0	0	0	0	0	0		1	0	0		0
NA_025_030	5	6	Natirae B	25	Not applicable	0	11	0	20.2	35.9	145	-0.0190839	0.127608	35.9	3.63082	0	0	1	0	0	0	0	0	1	0		1	0	0		0
NA_025_031	5	6	Natirae B	25	Not applicable	0	12	0	17.8	30.7	143	-1.53345	-0.949292	30.7	2.95788	0	0	0	0	0	0	0	0	0	0		1	0	0		0
NA_025_032	5	6	Natirae B	25	Not applicable	0	10	0	19.6	33.6	150	0.213327	1.81973	33.6	3.58095	0	0	1	0	1	0	0	0	0	0		1	0	0		0
NA_025_033	5	6	Natirae B	25	Not applicable	0	9	0	18.1	28.4	137	-0.097984	0.715415	28.4	3.19497	0	0	0	0	0	0	0	0	0	0		1	0	0		0
NA_025_034	5	6	Natirae B	25	Not applicable	0	11	0	16.8	29.9	140	-1.04041	-0.597435	29.9	3.00619	0	0	1	0	0	0	0	0	0	1	Wound	1	0	0		0
NA_025_035	5	6	Natirae B	25	Not applicable	0	9	0	18.4	28.4	141	-0.097984	1.40002	28.4	3.19497	0	0	1	0	0	0	0	0	0	1	Several Wounds	1	0	0		0
NA_025_036	5	6	Natirae B	25	Not applicable	0	9	0	14.6	21.7	129	-1.8611	-0.653803	21.7	1.921	0	0	0	0	0	0	0	0	0	0		1	0	0		0
NA_025_037	5	6	Natirae B	25	Not applicable	0	8	0	15.6	21.7	125	-1.16317	-0.427547	21.7	2.16322	0	0	0	0	0	0	0	0	0	0		1	0	0		0
NA_025_038	5	6	Natirae B	25	Not applicable	0	14	0	18.3	40.6	162	-1.33738	0.365219	40.6	3.73038	0	0	0	0	0	0	0	0	0	0		1	0	0		0
NA_025_039	5	6	Natirae B	25	Not applicable	0	11	0	17.6	27.6	138	-1.52372	-0.887452	27.6	2.68155	0	0	0	0	0	0	0	0	0	0		1	0	0		0
NA_025_040	5	6	Natirae B	25	Not applicable	0	8	0	16.6	24.8	127	-0.268464	-0.0621217	24.8	2.86414	0	0	0	0	0	0	0	0	0	0		1	0	0		0
NA_025_041	5	6	Natirae B	25	Not applicable	0	10	0	14.9	18	118	-4.02018	-3.21323	18	0.482809	2	2	0	0	0	0	0	0	0	0		1	0	0		0
NA_025_042	5	6	Natirae B	25	Not applicable	0	8	0	14.8	19.7	120	-1.87249	-1.34111	19.7	1.57112	0	0	0	0	0	0	0	0	0	0		1	0	0		0
[truncated: 2 more columns]

## Sheet: codebook
Variable	description	type	categories
Pupil_id	child's unique identifier	numeric, mixed
sub_county_id	sub county child is situated in	categorical	4: lotome, 5: matany, 11:Lokiteded T/C
parish_code	parish identifier	categorical	1:Dirtics, 2: Kalokengel, 3: Lokupi, 4: Lomuno, 5: Moruongor, 6: Nakichumet, 7:Nariamaregae
name_village	name of village	character
village_id	village identifier	numeric
manyatta	name of manyatta child lives in
in_manyatta	child lives in a manyatta	categorical	0: no, 1: yes
age	age of child, years	numeric
sex	sex of child	categorical	0: female, 1: male
muac	mid-upper arm circumference, cm	numeric
weight	weight of child, kg	numeric
height	height of child, cm	numeric
weight_for_age	weight for age	numeric	z-scores
height_for_age	height for age	numeric	z-scores
bmi	body mass index	numeric
bmi_for_age	bmi for age	numeric
wasted	child classified as wasted	categorical	0: no, 1: yes
stunted	child classified as stunted	categorical	0: no, 1: yes
oth_skn_inf	other skin infection/condition observed	categorical	0: no, 1: yes
name_oth_skin_inf___1	other skin condition-scabies	categorical	0: no, 1: yes
name_oth_skin_inf___2	other skin condition-ringworm	categorical	0: no, 1: yes
name_oth_skin_inf___3	other skin condition-podoconiosis	categorical	0: no, 1: yes
name_oth_skin_inf___4	other skin condition-Cutaneous larva migrans	categorical	0: no, 1: yes
name_oth_skin_inf___5	other skin condition-myiasis	categorical	0: no, 1: yes
name_oth_skin_inf___6	other skin condition-warts	categorical	0: no, 1: yes
name_oth_skin_inf___7	other skin condition-other	categorical	0: no, 1: yes
sp_oth_skin_nf	other skin condition	character
floor_child_sleep	floor material of room child sleeps in	categorical	1: mud/sand, 2: concrete
oth_inf_hh	other people in the household have jiggers	categorical	0: no, 1: yes
scr_fleas_hand	child has fleas on hands	categorical	0: no, 1: yes
no_fleas_hds	number of fleas on hands	numeric
scr_tunga_feet	child has fleas on feet	categorical	0: no, 1: yes
total_live	total number of live fleas on both feet	numeric
total_dead	total number of dead fleas on both feet	numeric
total_manip	total number of manipulated lesions on both feet	numeric
total_clusters	total number of flea clusters on both feet	numeric
total_pskin	total number of sites with peeling skin on both feet	numeric	maximum of 18, 9 sites per foot (5 toes, medial side, lateral side, sole & heel)
total_cracks	total number of sites with cracked skin on both feet	numeric	maximum of 18, 9 sites per foot (5 toes, medial side, lateral side, sole & heel)
total_ulcers	total number of sites with ulcers on both feet	numeric	maximum of 18, 9 sites per foot (5 toes, medial side, lateral side, sole & heel)
total abscess	total number of sites with abscesses on both feet	numeric	maximum of 18, 9 sites per foot (5 toes, medial side, lateral side, sole & heel)
total_hskin	total number of sites withthick hard skin on both feet	numeric	maximum of 18, 9 sites per foot (5 toes, medial side, lateral side, sole & heel)
total_tsnails	total number of sites with thick skin around nails on both feet	numeric	maximum of 10, 5 sites per foot (5 toes)
total_def_nails	total number of sites with deformed nails on both feet	numeric	maximum of 10, 5 sites per foot (5 toes)
total_lost_nails	total number of sites with lost nails on both feet	numeric	maximum of 10, 5 sites per foot (5 toes)
total_infrared	total number of sites with infra-red hotspots on both feet	numeric	maximum of 10, 5 sites per foot (5 toes)
total_fleas_recalc	total number of all fleas	numeric
cluster score	cluster score	numeric	number of clusters x 5
infection_intensity	infection intensity	numeric	number of fleas + cluster score
total_acute	total acute pathology score	numeric	sum of acute pathologies
total_chronic	total chronic pathology score	numeric	sum of chronic pathologies
all_pathology	total all pathology score	numeric	sum of all pathologies
all pathology+infrared	total all pathology score including infra-red hotspots	numeric	sum of all pathologies including infra-red
