# Supplementary material for: High density rural settlements, parenting behavior and child disability are significant factors associated with tungiasis in Karamoja, northeastern Uganda: a case control study
Source: Research Square preprint supplement (doi:10.21203/rs.3.rs-7288997/v1), 2025-08-20
Supplement: Supplementary file 4 [file 5fc1894f58d4309509d017ab.xlsx]

## Sheet: cover
High density rural settlements, parenting behavior and child disability are significant factors associated with the high prevalence of tungiasis in Karamoja, northeastern Uganda: a case control study.
Lynne Elson1,2, Abneel K. Matharu3, Berrick Otieno4, Herman Feldmeier5, Charles Waiswa6, Amina Abubakar4, Jürgen Krücken7,8, Ulrike Fillinger4, Francis Mutebi6 *
1 KEMRI-Wellcome Trust Research Programme, Kilifi, Kenya
2 Centre for Tropical Medicine and Global Health, Nuffield Department of Medicine, University of Oxford, Oxford, United Kingdom.
3 International Centre of Insect Physiology and Ecology (ICIPE), Human Health Theme, Nairobi, Kenya
4 Institute for Human Development, Aga Khan University, Nairobi, Kenya
5Institute of Microbiology, Infectious Diseases and Immunology, Charité University Medicine, Berlin, Germany
6 College of Veterinary Medicine, Animal Resources and Biosecurity, Makerere University, Kampala, Uganda
7 Institute for Parasitology and Tropical Veterinary Medicine, Freie Universität Berlin, Berlin, Germany
8 Veterinary Centre for Resistance Research, Freie Universität Berlin, Berlin, Germany
*Correspondence
francis.mutebi@mak.ac.ug

## Sheet: description
Project Name	Ecology of tungiasis
File Name	Elson Karamoja Adult foot exams dataset
Description	Data collected January to March 2022 during interviews of caregivers in Karamoja, Uganda
number of variables	67
number of observations	693
size of dataset	213 kb

## Sheet: data
HH_id	person_id	Pupil_id	screen_date_hh	sub_county	parish_code	village_name	village_id	manyatta_name	HH_in_manyatta	Index_case1_control0	age	adult_age_groups	adult_over60	sex_F1_M2	edu_adult	educ_recode	relation_hhd	oth_reltn_hhd	marital_status	marital_recode	occupation_adult	oth_occp_adult	occupation_recode	religion	disability	disability_recode	alcohol_use	alcoholuse_recode	other_current_ilnss___1	other_current_ilnss___2	other_current_ilnss___3	other_current_ilnss___4	other_current_ilnss___5	other_current_ilnss___6	other_current_ilnss___7	other_current_ilnss___8	other_current_ilnss___9	other_ilness_adult	sleep_place	other_sleeping_place	SESfactor2	tunga_hands	no_lesions_hands	tunga_feet	total_live_flea_count	total_dead_flea_count	total_manip_count	total_fleas	total_cluster_count
NA_001_002_H	NA_001_002_H_A01	NA_001_002	2022-01-17 11:21:00	4	2	Lobei	1	Lore Nakaao	1	1	58	3	0	2	1	1	2		2	1	5		2	2	0	0	2	1	0	1	0	0	0	0	0	0	0		1		0.656218	0		1	0	3	10	13	1
NA_001_002_H	NA_001_002_H_A02	NA_001_002	2022-01-17 11:49:00	4	2	Lobei	1	Lore Nakaao	1	1	30	2	0	1	0	0	1		2	1	3		1	2	0	0	2	1	1	0	0	0	0	0	0	0	0		1		0.656218	0		1	0	17	9	26	0
NA_001_005_H	NA_001_005_H_A01	NA_001_005	2022-01-17 09:58:00	4	2	Lobei	1	Lore Nakaao	1	1	25	2	0	1	0	0	1		3	2	3		1	2	0	0	2	1	1	0	0	0	0	0	0	0	0		1		0	0		1	0	16	17	33	0
NA_001_010_H	NA_001_010_H_A01	NA_001_010	2022-01-17 12:23:00	4	2	Lobei	1	Lore Nakaao	1	1	65	4	1	2	0	0	1		2	1	3		1	2	0	0	2	1	1	0	0	0	0	0	0	0	0		1		0.114623	0		1	3	3	31	37	0
NA_001_013_H	NA_001_013_H_A02	NA_001_013	2022-01-17 14:04:00	4	2	Lobei	1	Lore Nakaao	1	1	60	3	0	2	0	0	2		1	1	3		1	2	0	0	2	1	1	0	0	0	0	0	0	0	0		1		0	0		1	0	0	5	5	0
NA_001_013_H	NA_001_013_H_A01	NA_001_013	2022-01-17 12:58:00	4	2	Lobei	1	Lore Nakaao	1	1	70	4	1	1	0	0	1		2	1	3		1	2	0	0	2	1	1	0	0	0	0	0	0	0	0		1		0	0		1	1	7	22	30	2
NA_001_016_H	NA_001_016_H_A01	NA_001_016	2022-01-18 11:51:00	4	2	Lobei	1	Lore Amoses	1	1	30	2	0	1	0	0	1		2	1	3		1	2	0	0	5	0	0	1	0	0	0	0	0	0	0		1		0	0		1	0	3	15	18	1
NA_001_019_H	NA_001_019_H_A01	NA_001_019	2022-01-18 11:00:00	4	2	Lobei	1	Lore Kaabura	1	1	42	2	0	1	0	0	1		2	1	3		1	2	0	0	5	0	0	0	0	0	0	0	0	0	1	Body pain	1		0	0		1	3	21	22	46	0
NA_001_020_H	NA_001_020_H_A01	NA_001_020	2022-01-17 14:42:00	4	2	Lobei	1	Lore Kaabura	1	1	60	3	0	1	0	0	6	Grand child	2	1	3		1	2	0	0	2	1	1	0	0	0	0	0	0	0	0		1		0.402395	0		1	0	1	2	3	0
NA_001_021_H	NA_001_021_H_A01	NA_001_021	2022-01-18 09:31:00	4	2	Lobei	1	Lore Kaabura	1	1	48	3	0	1	0	0	1		1	1	3		1	2	0	0	4	1	0	0	0	0	0	0	0	0	1	Body pain	1		0.114623	0		1	0	0	0	0	0
NA_001_027_H	NA_001_027_H_A01	NA_001_027	2022-01-18 15:44:00	4	2	Lobei	1	Lore Alorot	1	1	25	2	0	1	0	0	1		5	2	3		1	2	0	0	5	0	0	1	0	0	0	0	0	0	0		1		0	0		1	1	4	27	32	1
NA_001_032_H	NA_001_032_H_A01	NA_001_032	2022-01-18 13:47:00	4	2	Lobei	1	Lore Alorot	1	1	36	2	0	1	0	0	1		1	1	3		1	2	0	0	4	1	1	0	0	0	0	0	0	0	0		1		0.268542	0		1	2	0	4	6	0
NA_001_033_H	NA_001_033_H_A01	NA_001_033	2022-01-18 18:04:00	4	2	Lobei	1	Lore Kaabura	1	1	36	2	0	1	0	0	2		2	1	3		1	2	0	0	4	1	1	0	0	0	0	0	0	0	0		1		0.114623	0		1	0	1	11	12	0
NA_001_035_H	NA_001_035_H_A01	NA_001_035	2022-01-18 17:00:00	4	2	Lobei	1	Lore Kaabura	1	1	24	1	0	1	3	2	1		1	1	3		1	2	0	0	4	1	1	0	0	0	0	0	0	0	0		1		0.268542	0		1	0	0	3	3	0
NA_002_060_H	NA_002_060_H_A02	NA_002_060	2022-01-21 09:58:00	4	2	Loroo	2	Lore Aichumar	1	1	32	2	0	1	0	0	4		2	1	3		1	2	0	0	4	1	1	0	0	0	0	0	0	0	0		5	Neighbor's hut	0	0		1	0	0	6	6	0
NA_002_060_H	NA_002_060_H_A03	NA_002_060	2022-01-21 10:11:00	4	2	Loroo	2	Lore Aichumar	1	1	40	2	0	1	0	0	1		2	1	3		1	2	0	0	5	0	0	0	0	0	0	0	0	1	0		5	Neighbor's hut	0	0		1	0	2	20	22	0
NA_002_060_H	NA_002_060_H_A04	NA_002_060	2022-01-21 10:23:00	4	2	Loroo	2	Lore Aichumar	1	1	56	3	0	1	0	0	5		1	1	9		0	2	1	1	5	0	1	0	0	0	0	0	0	0	0		1		0	1	24	1	4	17	26	47	5
NA_002_060_H	NA_002_060_H_A05	NA_002_060	2022-01-21 10:26:00	4	2	Loroo	2	Lore Aichumar	1	1	46	3	0	2	1	1	4		3	2	9		0	2	0	0	5	0	0	1	1	0	0	0	0	0	1	HIV/AIDS	1		0	0		1	6	2	16	24	0
NA_002_062_H	Na_002_062_H_A01	NA_002_062	2022-01-21 12:39:00	4	2	Loroo	2	Lore Kaaguma	1	1	48	3	0	1	0	0	1		3	2	9		0	2	0	0	2	1	0	1	0	0	1	0	0	0	0		1		0	0		1	0	2	11	13	0
NA_002_068_H	NA_002_068_H_A01	NA_002_068	2022-01-24 09:48:00	4	2	Loroo	2	Lore Alotukei	1	1	80	4	1	1	0	0	1		3	2	9		0	2	1	1	4	1	0	1	0	0	1	0	1	0	0		1		0	0		1	3	4	1	8	0
NA_002_071_H	NA_002_071_H_A03	NA_002_071	2022-01-24 09:15:00	4	2	Loroo	2	Lore Alotukei	1	1	53	3	0	2	2	2	4		1	1	4		2	2	1	1	5	0	1	0	0	0	0	0	0	0	0		1		0.268542	0		1	0	1	9	10	0
NA_002_071_H	NA_002_071_H_A02	NA_002_071	2022-01-24 09:19:00	4	2	Loroo	2	Lore Alotukei	1	1	73	4	1	1	0	0	5	Mother-In-law	3	2	9		0	2	1	1	2	1	0	0	0	0	1	1	1	0	0		5	Grand mother's hut	0.268542	1	4	1	40	4	19	63	1
NA_002_080_H	NA_002_080_H_A01	NA_002_080	2022-01-21 16:37:00	4	2	Loroo	2	Lore Kaalem	1	1	43	2	0	1	0	0	2		2	1	9		0	2	0	0	5	0	0	0	0	0	0	0	0	0	1	Breast pain	1		0.383165	0		1	0	0	3	3	0
NA_002_082_H	NA_002_082_H_A01	NA_002_082	2022-01-24 12:17:00	4	2	Loroo	2	Lore Kaalem	1	1	45	3	0	1	0	0	1		1	1	9		0	2	0	0	2	1	0	0	0	0	0	0	0	0	1	Body pain	1		0	0		1	1	1	23	25	0
NA_002_083_H	NA_002_083_H_A01	NA_002_083	2022-01-21 14:11:00	4	2	Loroo	2	Lore Aichumar	1	1	22	1	0	1	1	1	1		2	1	3		1	2	0	0	4	1	0	1	0	0	0	0	0	0	0		1		0.735827	0		1	1	0	3	4	0
NA_002_089_H	NA_002_089_H_A02	NA_002_089	2022-01-21 16:16:00	4	2	Loroo	2	Lore Aloduk	1	1	24	1	0	1	1	1	3		2	1	4		2	2	0	0	4	1	1	0	0	0	0	0	0	0	0		1		0.448054	0		1	4	0	2	6	0
NA_002_089_H	NA_002_089_H_A01	NA_002_089	2022-01-21 15:23:00	4	2	Loroo	2	Lore Aloduk	1	1	23	1	0	1	0	0	3		1	1	4		2	2	0	0	4	1	0	1	0	0	0	0	0	0	0		1		0.448054	0		1	1	0	0	1	0
NA_002_090_H	NA_002_090_H_A01	NA_002_090	2022-01-24 11:20:00	4	2	Loroo	2	Lore Alotukei	1	1	53	3	0	1	0	0	1		2	1	4		2	2	0	0	4	1	1	0	0	0	0	0	0	0	0		1		0.268542	0		1	1	0	2	3	0
NA_002_105_H	NA_002_105_H_A01	NA_002_105	2022-01-21 13:21:00	4	2	Loroo	2	Lore Kaaguma	1	1	81	4	1	1	0	0	1		3	2	4		2	2	1	1	4	1	0	0	0	0	0	0	1	0	0		1		0	1	3	1	1	0	27	28	2
NA_002_107_H	NA_002_107_H_A02	NA_002_107	2022-01-21 15:02:00	4	2	Loroo	2	Lore Alolem	1	1	75	4	1	1	0	0	3		3	2	9		0	2	1	1	5	0	1	0	0	0	0	0	0	0	0		5	Grand mother's hut	0	0		1	2	3	0	5	0
NA_002_107_H	NA_002_107_H_A01	NA_002_107	2022-01-21 14:44:00	4	2	Loroo	2	Lore Alolem	1	1	25	2	0	1	0	0	1		2	1	3		1	2	0	0	4	1	0	1	0	0	0	0	0	0	0		1		0	0		1	0	0	4	4	0
NA_003_003_H	NA_003_003_H_A01	NA_003_003	2022-01-25 09:35:00	4	2	Naregei-Nakoreete	3	Lore Apokomol	1	1	90	4	1	1	0	0	1		3	2	9		0	2	0	0	5	0	0	0	1	0	0	0	0	0	0		1		0	1	1	1	0	10	7	17	0
NA_003_010_H	NA_003_010_H_A01	NA_003_010	2022-01-25 10:28:00	4	2	Naregei-Nakoreete	3	Lore Kaaguma	1	1	71	4	1	2	2	2	3		1	1	2		4	2	1	1	4	1	0	1	0	0	0	0	0	0	0		1		0.541595	0		1	5	16	5	26	0
NA_003_014_H	NA_003_014_H_A01	NA_003_014	2022-01-25 09:51:00	4	2	Naregei-Nakoreete	3	Lore Apokomol	1	1	91	4	1	1	0	0	1		3	2	9		0	2	1	1	5	0	0	0	0	0	1	0	0	0	0		1		0	0		1	0	0	17	17	0
NA_003_019_H	NA_003_019_H_A01	NA_003_019	2022-01-25 13:32:00	4	2	Naregei-Nakoreete	3	Lore Kaaguma	1	1	48	3	0	1	0	0	1		2	1	3		1	2	0	0	4	1	1	0	0	0	0	0	0	0	0		1		0.268542	0		1	2	6	12	20	13
NA_003_021_H	NA_003_021_H_A01	NA_003_021	2022-01-24 15:00:00	4	2	Naregei-Nakoreete	3	Lore Apokomol	1	1	77	4	1	1	1	1	1		3	2	3		1	2	1	1	5	0	0	0	0	0	1	0	0	0	0		1		0	0		1	3	3	25	31	0
NA_003_027_H	NA_003_027_H_A01	NA_003_027	2022-01-25 12:13:00	4	2	Naregei-Nakoreete	3	Lore Apokomol	1	1	58	3	0	1	0	0	1		3	2	9		0	2	0	0	2	1	1	0	0	0	0	0	0	0	0		1		0	1	29	1	23	55	13	91	15
NA_003_031_H	NA_003_031_H_A01	NA_003_031	2022-01-24 15:39:00	4	2	Naregei-Nakoreete	3	Lore Kaaguma	1	1	50	3	0	1	0	0	1		2	1	3		1	2	0	0	4	1	1	0	0	0	0	0	0	0	0		1		0.721107	0		1	1	33	13	47	1
NA_003_031_H	NA_003_031_H_A02	NA_003_031	2022-01-24 15:57:00	4	2	Naregei-Nakoreete	3	Lore Kaaguma	1	1	62	4	1	2	0	0	2		2	1	9		0	2	1	1	4	1	1	0	0	0	0	0	0	0	0		1		0.721107	1	1	1	0	0	10	10	0
NA_003_032_H	NA_003_032_H_A01	NA_003_032	2022-01-25 08:57:00	4	2	Naregei-Nakoreete	3	Lore Apokomol	1	1	38	2	0	1	0	0	1		3	2	3		1	2	0	0	5	0	0	0	0	0	0	0	0	0	1	Body pain	1		0.268542	1	2	1	1	11	49	61	5
NA_003_051_H	NA_003_051_H_A01	NA_003_051	2022-01-25 11:30:00	4	2	Naregei-Nakoreete	3	Lore Apokomol	1	1	50	3	0	1	0	0	1		2	1	3		1	2	0	0	5	0	0	0	0	0	0	0	0	1	0		1		0	0		1	0	0	29	29	0
NA_003_052_H	NA_003_052_H_A01	NA_003_052	2022-01-25 13:05:00	4	2	Naregei-Nakoreete	3	Lore Apokomol	1	1	32	2	0	1	0	0	1		2	1	3		1	2	0	0	4	1	1	0	0	0	0	0	0	0	0		1		0	1	1	1	2	0	34	36	0
NA_003_053_H	NA_003_053_H_A02	NA_003_053	2022-01-24 14:10:00	4	2	Naregei-Nakoreete	3	Lore Apokomol	1	1	56	3	0	1	0	0	1		2	1	3		1	2	0	0	4	1	1	0	0	0	0	0	0	0	0		1		0.179511	0		1	1	2	24	27	1
NA_003_053_H	NA_003_053_H_A01	NA_003_053	2022-01-24 13:55:00	4	2	Naregei-Nakoreete	3	Lore Apokomol	1	1	92	4	1	1	0	0	5	Mother-In-law	3	2	9		0	2	0	0	5	0	0	1	0	0	0	0	0	0	0		1		0.179511	0		1	4	7	3	14	6
NA_003_054_H	NA_003_054_H_A01	NA_003_054	2022-01-24 14:31:00	4	2	Naregei-Nakoreete	3	Lore Apokomol	1	1	77	4	1	1	0	0	5		3	2	9		0	2	1	1	5	0	0	1	0	0	0	0	0	0	0		1		0.556315	0		1	3	4	11	18	9
NA_003_110_H	NA_003_110_H_A02	NA_003_110	2022-01-24 13:20:00	4	2	Naregei-Nakoreete	3	Lore Apokomol	1	1	43	2	0	1	0	0	1		2	1	3		1	2	0	0	5	0	0	1	0	0	0	0	0	0	0		1		0	1	4	1	10	2	53	65	1
NA_005_009_H	NA_005_009_H_A01	NA_005_009	2022-02-01 10:24:00	4	2	Nachuka	5	Lore Koopuwa	1	1	48	3	0	1	0	0	1		2	1	3		1	2	0	0	4	1	0	1	0	0	0	0	0	0	0		1		0	0		1	11	1	23	35	2
NA_005_011_H	NA_005_011_H_A01	NA_005_011	2022-01-31 10:16:00	4	2	Nachuka	5	Lore Koopuwa	1	1	30	2	0	1	0	0	1		1	1	9		0	2	0	0	2	1	0	0	0	0	0	0	0	1	0		1		0	0		1	2	2	4	8	0
NA_005_026_H	NA_005_026_H_A01	NA_005_026	2022-01-31 12:06:00	4	2	Nachuka	5	Lore Kaapuun	1	1	30	2	0	1	0	0	1		3	2	3		1	2	0	0	2	1	1	0	0	0	0	0	0	0	0		1		0	0		1	0	0	5	5	0
NA_005_031_H	NA_005_031_H_A01	NA_005_031	2022-01-31 09:33:00	4	2	Nachuka	5	Lore Alotee	1	1	24	1	0	1	0	0	1		1	1	3		1	2	0	0	1	1	1	0	0	0	0	0	0	0	0		1		0	0		1	0	0	4	4	0
NA_005_034_H	NA_005_034_H_A01	NA_005_034	2022-01-31 14:54:00	4	2	Nachuka	5	Lore Kaapuun	1	1	60	3	0	1	0	0	1		1	1	8		3	2	0	0	4	1	0	0	0	0	0	0	0	0	1	Body pain	1		0	0		1	0	0	3	3	0
NA_005_039_H	NA_005_039_H_A01	NA_005_039	2022-01-31 10:35:00	4	2	Nachuka	5	Lore Koopuwa	1	1	25	2	0	1	0	0	1		2	1	3		1	2	0	0	1	1	0	1	0	0	0	0	0	0	0		1		0	0		1	0	0	7	7	1
NA_005_042_H	NA_005_042_H_A01	NA_005_042	2022-01-31 11:32:00	4	2	Nachuka	5	Lore Alotee	1	1	41	2	0	1	0	0	1		3	2	3		1	2	0	0	5	0	0	0	0	0	0	0	0	0	1	Tumour on the right hand	1		0	0		1	2	1	27	30	1
NA_005_047_H	NA_005_047_H_A01	NA_005_047	2022-02-01 09:57:00	4	2	Nachuka	5	Lore Alotee	1	1	30	2	0	1	0	0	1		1	1	3		1	2	0	0	4	1	0	0	0	0	0	0	0	0	1	Brucellosis	1		0.268542	0		1	0	1	5	6	0
NA_005_053_H	NA_005_053_H_A01	NA_005_053	2022-01-31 13:02:00	4	2	Nachuka	5	Lore Kaapuun	1	1	42	2	0	1	1	1	1		3	2	3		1	2	0	0	4	1	0	1	0	0	0	0	0	0	0		1		0	0		1	0	0	4	4	0
NA_005_054_H	NA_005_054_H_A01	NA_005_054	2022-01-31 12:27:00	4	2	Nachuka	5	Lore Kaapuun	1	1	30	2	0	1	0	0	1		2	1	3		1	2	0	0	4	1	1	0	0	0	0	0	0	0	0		1		0	0		1	0	0	1	1	0
NA_005_061_H	NA_005_061_H_A01	NA_005_061	2022-01-31 13:55:00	4	2	Nachuka	5	Lore Koopuwa	1	1	25	2	0	2	0	0	1		4	2	3		1	2	0	0	2	1	0	0	0	0	0	0	0	0	1	General body weakness	1		0	0		1	0	0	46	46	0
NA_006_010_H	NA_006_010_H_A01	NA_006_010	2022-02-03 11:34:00	4	2	Akwapuwa-Loluk	6	Lore Apakarengit	1	1	25	2	0	1	0	0	6	Sister-In-law	1	1	3		1	2	0	0	2	1	1	0	0	0	0	0	0	0	0		1		0	0		1	0	0	3	3	0
NA_006_010_H	NA_006_010_H_A02	NA_006_010	2022-02-03 11:50:00	4	2	Akwapuwa-Loluk	6	Lore Apakarengit	1	1	82	4	1	1	0	0	5		2	1	3		1	2	0	0	2	1	1	0	0	0	0	0	0	0	0		1		0	0		1	1	16	5	22	0
NA_006_018_H	NA_006_018_H_A01	NA_006_018	2022-02-03 13:48:00	4	2	Akwapuwa-Loluk	6	Lore Alotimong	1	1	51	3	0	1	0	0	1		5	2	3		1	2	1	1	2	1	0	0	0	0	1	0	0	0	0		1		0	1	9	1	36	12	23	71	3
NA_006_018_H	NA_006_018_H_A02	NA_006_018	2022-02-03 14:16:00	4	2	Akwapuwa-Loluk	6	Lore Alotimong	1	1	73	4	1	1	0	0	6	Aunt	3	2	3		1	2	0	0	2	1	1	0	0	0	0	0	0	0	0		1		0	1	3	1	24	10	15	49	3
NA_006_018_H	NA_006_018_H_A03	NA_006_018	2022-02-03 14:31:00	4	2	Akwapuwa-Loluk	6	Lore Alotimong	1	1	84	4	1	1	0	0	6	Aunt	3	2	9		0	2	0	0	2	1	0	1	0	0	0	0	0	0	0		1		0	1	39	1	19	4	12	35	5
NA_006_019_H	NA_006_019_H_A01	NA_006_019	2022-02-03 14:58:00	4	2	Akwapuwa-Loluk	6	Lore Alotimong	1	1	57	3	0	1	0	0	1		1	1	3		1	2	0	0	2	1	1	0	0	0	0	0	0	0	0		1		0	0		1	4	1	21	26	1
NA_006_024_H	NA_006_024_H_A01	NA_006_024	2022-02-03 10:02:00	4	2	Akwapuwa-Loluk	6	Lore Apakarengit	1	1	41	2	0	1	0	0	1		2	1	3		1	2	0	0	2	1	1	0	0	0	0	0	0	0	0		1		0.268542	0		1	0	2	7	9	0
NA_006_047_H	NA_006_047_H_A01	NA_006_047	2022-02-04 09:03:00	4	2	Akwapuwa-Loluk	6	Lore Adengel	1	1	38	2	0	1	0	0	1		2	1	3		1	2	0	0	2	1	1	0	0	0	0	0	0	0	0		1		0	0		1	0	0	11	11	0
NA_006_051_H	NA_006_051_H_A01	NA_006_051	2022-02-03 11:04:00	4	2	Akwapuwa-Loluk	6	Lore Apakarengit	1	1	49	3	0	2	0	0	2		2	1	3		1	2	0	0	2	1	1	0	0	0	0	0	0	0	0		1		0.448054	0		1	0	0	8	8	0
NA_006_052_H	NA_006_052_H_A02	NA_006_052	2022-02-03 09:40:00	4	2	Akwapuwa-Loluk	6	Lore Apakarengit	1	1	50	3	0	2	0	0	1		1	1	3		1	1	0	0	1	1	1	0	0	0	0	0	0	0	0		1		0	0		1	0	0	4	4	0
NA_006_052_H	NA_006_052_H_A01	NA_006_052	2022-02-03 09:22:00	4	2	Akwapuwa-Loluk	6	Lore Apakarengit	1	1	23	1	0	1	0	0	2		1	1	3		1	2	0	0	2	1	1	0	0	0	0	0	0	1	0		1		0	0		1	0	0	12	12	0
NA_006_057_H	NA_006_057_H_A01	NA_006_057	2022-02-03 13:12:00	4	2	Akwapuwa-Loluk	6	Lore Alotimong	1	1	32	2	0	2	3	2	2		1	1	3		1	2	0	0	2	1	1	0	0	0	0	0	0	0	0		1		0	0		1	0	0	3	3	0
NA_006_060_H	NA_006_060_H_A01	NA_006_060	2022-02-03 16:19:00	4	2	Akwapuwa-Loluk	6	Lore Adengel	1	1	33	2	0	1	0	0	1		2	1	3		1	2	1	1	2	1	0	0	0	1	0	0	0	0	0		5	Neighbor's hut	0	0		1	0	4	3	7	1
NA_006_069_H	NA_006_069_H_A01	NA_006_069	2022-02-03 10:40:00	4	2	Akwapuwa-Loluk	6	Lore Apakarengit	1	1	35	2	0	1	1	1	1		2	1	3		1	2	2	1	2	1	1	0	0	0	0	0	0	0	0		1		0	0		1	0	2	20	22	0
NA_006_071_H	NA_006_071_H_A01	NA_006_071	2022-02-03 09:01:00	4	2	Akwapuwa-Loluk	6	Lore Apakarengit	1	1	54	3	0	1	0	0	1		2	1	3		1	2	0	0	2	1	0	0	0	0	0	0	1	0	0		1		0	0		1	0	1	9	10	0
NA_006_075_H	NA_006_075_H_A01	NA_006_075	2022-02-03 12:46:00	4	2	Akwapuwa-Loluk	6	Lore Alotimong	1	1	46	3	0	2	0	0	1		1	1	3		1	2	0	0	2	1	0	0	0	0	0	0	1	0	0		1		0	0		1	5	1	40	46	1
NA_006_077_H	NA_006_077_H_A01	NA_006_077	2022-02-03 15:48:00	4	2	Akwapuwa-Loluk	6	Lore Adengel	1	1	56	3	0	2	0	0	1		2	1	3		1	2	0	0	2	1	1	0	0	0	0	0	0	0	0		1		0	0		1	0	0	3	3	0
NA_007_007_H	NA_007_007_H_A01	NA_007_007	2022-02-04 13:56:00	4	2	Angarab	7	Lore Aloyor	1	1	25	2	0	1	0	0	1		3	2	3		1	2	0	0	2	1	1	0	0	0	0	0	0	0	0		5	Sleeping shed	0	0		1	0	0	1	1	0
NA_007_011_H	NA_007_011_H_A01	NA_007_011	2022-02-04 11:08:00	4	2	Angarab	7	Lore Kootyang	1	1	35	2	0	1	0	0	1		3	2	3		1	2	0	0	2	1	0	1	0	0	0	0	0	0	0		1		0	0		1	0	0	9	9	0
NA_007_013_H	NA_007_013_H_A01	NA_007_013	2022-02-04 12:56:00	4	2	Angarab	7	Lore Aloyor	1	1	45	3	0	1	0	0	1		2	1	3		1	2	0	0	2	1	1	0	0	0	0	0	0	0	1	Wound	1		0.287773	0		1	0	0	8	8	0
NA_007_014_H	NA_007_014_H_A01	NA_007_014	2022-02-04 14:33:00	4	2	Angarab	7	Lore Kaabura	1	1	50	3	0	1	0	0	6	Grand mother	1	1	3		1	2	0	0	2	1	0	1	0	0	1	0	0	0	0		5	Grand mother's hut	0	0		1	0	0	2	2	0
NA_007_015_H	NA_007_015_H_A01	NA_007_015	2022-02-04 12:31:00	4	2	Angarab	7	Lore Aloyor	1	1	75	4	1	2	0	0	6	Grand parent	2	1	3		1	2	1	1	2	1	1	0	0	0	0	0	0	0	0		5	Grand mother's hut	0	0		1	0	0	3	3	0
NA_007_029_H	NA_007_029_H_A01	NA_007_029	2022-02-04 10:41:00	4	2	Angarab	7	Lore Kaabura	1	1	66	4	1	1	0	0	1		3	2	3		1	2	0	0	2	1	0	0	0	0	1	0	0	0	0		1		0	0		1	1	0	8	9	0
NA_007_038_H	NA_007_038_H_A01	NA_007_038	2022-02-04 13:18:00	4	2	Angarab	7	Lore Aloyor	1	1	60	3	0	1	0	0	2		1	1	3		1	2	0	0	2	1	0	1	0	0	0	0	0	0	0		1	Adults only hut	0.273053	0		1	0	0	3	3	0
NA_012_008_H	NA_012_008_H_A01	NA_012_008	2022-02-21 12:41:00	4	2	Naitakwae	12	Lore Apalotom	1	1	72	4	1	1	0	0	1		2	1	9		0	2	0	0	4	1	1	0	0	0	0	0	0	0	0		1		0	0		1	6	7	2	15	2
NA_012_010_H	NA_012_010_H_A01	NA_012_010	2022-02-21 12:08:00	4	2	Naitakwae	12	Lore Apalotom	1	1	20	1	0	1	0	0	5		1	1	7		3	2	0	0	2	1	1	0	0	0	0	0	0	0	0		5	Neighbor's hut	0	0		1	0	1	5	6	0
NA_012_010_H	NA_012_010_H_A02	NA_012_010	2022-02-21 12:17:00	4	2	Naitakwae	12	Lore Apalotom	1	1	38	2	0	1	0	0	1		2	1	7		3	2	0	0	2	1	1	0	0	0	0	0	0	0	0		1		0	1	1	1	14	12	5	31	1
NA_012_011_H	NA_012_011_H_A01	NA_012_011	2022-02-21 14:48:00	4	2	Naitakwae	12	Lore Apalotom	1	1	45	3	0	1	0	0	1		1	1	7		3	2	0	0	4	1	0	1	0	0	0	0	0	0	0		1		0	1	11	1	34	81	1	116	10
NA_012_012_H	NA_012_012_H_A03	NA_012_012	2022-02-21 13:09:00	4	2	Naitakwae	12	Lore Apalotom	1	1	86	4	1	2	0	0	3		1	1	9		0	2	1	1	4	1	1	0	0	0	0	0	0	0	0		3		0.114623	0		1	0	0	1	1	0
NA_012_012_H	NA_012_012_H_A02	NA_012_012	2022-02-21 12:59:00	4	2	Naitakwae	12	Lore Apalotom	1	1	47	3	0	1	0	0	3		1	1	7		3	2	0	0	4	1	0	0	0	0	0	1	0	0	0		3		0.114623	0		1	0	0	1	1	0
NA_012_021_H	NA_012_021_H_A01	NA_012_021	2022-02-21 08:49:00	4	2	Naitakwae	12	Lore Apalotuko	1	1	48	3	0	2	0	0	4		1	1	3		1	2	0	0	1	1	1	0	0	0	0	0	0	0	0		5	Neighbor's hut	0	0		1	1	0	1	2	0
NA_012_021_H	NA_012_021_H_A02	NA_012_021	2022-02-21 09:01:00	4	2	Naitakwae	12	Lore Apalotuko	1	1	40	2	0	1	0	0	1		5	2	3		1	2	0	0	2	1	0	1	0	0	0	0	0	0	0		1		0	1	1	1	5	13	14	32	1
NA_012_023_H	NA_012_023_H_A02	NA_012_023	2022-02-21 13:29:00	4	2	Naitakwae	12	Lore Apalotom	1	1	60	3	0	1	0	0	1		3	2	9		0	2	1	1	4	1	0	0	0	0	0	0	0	0	1	Body pain	1		0	0		1	1	0	1	2	0
NA_012_023_H	NA_012_023_H_A01	NA_012_023	2022-02-21 13:23:00	4	2	Naitakwae	12	Lore Apalotom	1	1	70	4	1	2	0	0	2		4	2	9		0	2	1	1	4	1	1	0	0	0	0	0	0	0	0		3		0	0		1	0	1	2	3	0
NA_012_025_H	NA_012_025_H_A01	NA_012_025	2022-02-21 14:34:00	4	2	Naitakwae	12	Lore Apalotom	1	1	48	3	0	1	0	0	1		5	2	7		3	2	0	0	2	1	0	1	0	0	0	0	0	0	0		1		0.268542	0		1	0	0	7	7	0
NA_012_035_H	NA_012_035_H_A01	NA_012_035	2022-02-21 13:57:00	4	2	Naitakwae	12	Lore Apalotom	1	1	49	3	0	2	1	1	2		2	1	7		3	2	0	0	2	1	0	0	1	0	0	0	0	0	0		1		1.1235	0		1	0	0	3	3	0
NA_012_035_H	NA_012_035_H_A02	NA_012_035	2022-02-21 14:00:00	4	2	Naitakwae	12	Lore Apalotom	1	1	60	3	0	1	0	0	1		2	1	4		2	2	1	1	2	1	0	1	0	0	0	0	0	0	0		2		1.1235	0		1	0	0	12	12	0
NA_012_039_H	NA_012_039_H_A01	NA_012_039	2022-02-21 10:23:00	4	2	Naitakwae	12	Lore Apalotuko	1	1	34	2	0	1	1	1	1		1	1	3		1	2	1	1	2	1	1	0	0	0	0	0	0	0	0		2		0.273053	0		1	13	30	13	56	5
NA_016_005_H	NA_016_005_H_A01	NA_016_005	2022-03-10 14:30:00	4	2	Lominit	16	Lore Achuule	1	1	65	4	1	1	0	0	5		3	2	3		1	2	0	0	2	1	1	0	0	0	0	0	0	0	0		1		0	0		1	0	0	2	2	0
NA_016_012_H	NA_016_012_H_A01	NA_016_012	2022-03-07 14:43:00	4	2	Lominit	16	Lore Achuule	1	1	33	2	0	1	0	0	1		1	1	3		1	2	0	0	2	1	0	1	0	0	0	0	0	0	0		1		0.656218	0		1	1	10	2	13	0
NA_016_023_H	NA_016_023_H_A01	NA_016_023	2022-03-10 09:14:00	4	2	Lominit	16	Lore Achuule	1	1	50	3	0	1	0	0	1		2	1	3		1	2	0	0	2	1	0	0	0	0	0	0	0	0	1	Joint pain	1		0	0		1	8	3	40	51	0
NA_016_025_H	NA_016_025_H_A01	NA_016_025	2022-03-07 11:04:00	4	2	Lominit	16	Lore Achuule	1	1	48	3	0	1	0	0	1		3	2	3		1	2	0	0	2	1	1	0	0	0	0	0	0	0	1		1		0.556315	0		1	2	16	7	25	0
NA_016_036_H	NA_016_036_H_A01	NA_016_036	2022-03-10 11:58:00	4	2	Lominit	16	Lore Aloitanin	1	1	49	3	0	1	0	0	1		1	1	3		1	2	0	0	2	1	1	0	0	0	0	0	0	0	0		1		0	0		1	10	5	26	41	1
NA_016_048_H	NA_016_048_H_A01	NA_016_048	2022-03-07 12:54:00	4	2	Lominit	16	Lore Apalopale	1	1	47	3	0	1	0	0	1		1	1	3		1	2	0	0	2	1	0	1	0	0	0	0	1	0	0		1		0	0		1	0	1	6	7	0
NA_016_067_H	NA_016_067_H_A01	NA_016_067	2022-03-07 10:03:00	4	2	Lominit	16	Lore Achuule	1	1	71	4	1	1	5	2	5	Mother-In-law	3	2	3		1	2	0	0	2	1	0	1	0	0	0	0	0	0	0		1		0	0		1	1	18	3	22	0
NA_001_018_H	NA_001_018_H_A01		2022-01-18 12:51:00	4	2	Lobei	1	Lore aMoses		1	38	2	0	1	0	0	1		2	1	3		1	2	0	0	5	0	0	0	0	0	0	0	0	0	1	Wound	1			0		1	0	3	12	15	0
NA_002_048_H	NA_002_048_H_A01	NA_002_048	2022-01-21 08:57:00	4	2	Loroo	2	Lore Aichumar	1	1	41	2	0	1	0	0	1		2	1	3		1	2	0	0	5	0	1	0	0	0	0	0	0	0	0		1		0	0		1	0	0	1	1	0
NA_012_037_H	NA_012_037_H_A01	NA_012_037	2022-02-21 15:37:00	4	2	Naitakwae	12	Lore Apalotom	1	1	34	2	0	1	0	0	1		1	1	3		1	2	0	0	4	1	0	1	0	0	0	0	0	0	0		1		0	1	10	1	11	17	23	51	11
NA_012_040_H	NA_012_040_H_A02	NA_012_040	2022-02-21 11:44:00	4	2	Naitakwae	12	Lore Apalotuko	1	1	46	3	0	2	0	0	2		2	1	4		2	2	0	0	2	1	1	0	0	0	0	0	0	0	0		1		0.448054	0		1	0	0	1	1	0
NA_012_040_H	NA_012_040_H_A01	NA_012_040	2022-02-21 11:34:00	4	2	Naitakwae	12	Lore Apalotuko	1	1	26	2	0	1	0	0	1		2	1	7		3	2	0	0	4	1	1	0	0	0	0	0	0	0	0		1		0.448054	0		1	1	1	3	5	0
NA_004_003_H	NA_004_003_H_A01	NA_004_003	2022-01-28 11:18:00	4	4	Naoyaminit	4	Lore Aporengereng	1	1	47	3	0	1	0	0	1		1	1	9		0	2	0	0	2	1	0	1	0	0	0	0	0	0	1	Typhoid	1		0	0		1	1	0	5	6	0
NA_004_021_H	NA_004_021_H_A02	NA_004_021	2022-01-28 09:57:00	4	4	Naoyaminit	4	Lore Alouro	1	1	30	2	0	1	0	0	1		1	1	3		1	2	0	0	4	1	1	0	0	0	0	0	0	0	0		1		0.287773	0		1	0	0	7	7	0
NA_004_035_H	NA_004_035_H_A01	NA_004_035	2022-01-28 08:36:00	4	4	Naoyaminit	4	Lore Alouro	1	1	57	3	0	1	0	0	4		2	1	9		0	2	0	0	2	1	0	1	0	0	0	0	0	0	0		5	Neighbor's hut	0	0		1	0	2	23	25	0
NA_004_044_H	NA_004_044_H_A01	NA_004_044	2022-01-28 12:23:00	4	4	Naoyaminit	4	Lore Aporengereng	1	1	33	2	0	1	0	0	6	Cousin sister	1	1	9		0	2	0	0	3	1	0	1	0	0	0	0	0	0	0		5	Neighbor's hut	0.541595	0		1	0	0	3	3	0
NA_004_048_H	NA_004_048_H_A01	NA_004_048	2022-01-28 09:29:00	4	4	Naoyaminit	4	Lore Alouro	1	1	26	2	0	1	0	0	1		2	1	9		0	2	0	0	2	1	0	1	0	0	0	0	0	0	0		1		0	0		1	0	0	10	10	0
NA_004_067_H	NA_004_067_H_A01	NA_004_067	2022-01-27 10:12:00	4	4	Naoyaminit	4	Lore Apalowal	1	1	36	2	0	1	0	0	1		2	1	9		0	2	0	0	2	1	0	1	0	0	0	0	0	0	0		1		0.268542	0		1	0	0	3	3	0
NA_004_068_H	NA_004_068_H_A01	NA_004_068	2022-01-27 12:17:00	4	4	Naoyaminit	4	Lore Apalowal	1	1	28	2	0	1	1	1	5		2	1	9		0	2	0	0	5	0	0	1	0	0	0	0	0	0	0		5	Neighbor's hut	0	0		1	0	0	7	7	0
NA_004_077_H	NA_004_077_H_A01	NA_004_077	2022-01-27 11:40:00	4	4	Naoyaminit	4	Lore Apalowal	1	1	45	3	0	1	1	1	1		1	1	9		0	2	0	0	2	1	0	1	0	0	0	0	0	0	1	Eye problem	1		0	0		1	2	7	15	24	0
NA_004_085_H	NA_004_085_H_A01	NA_004_085	2022-01-27 11:09:00	4	4	Naoyaminit	4	Lore Apalowal	1	1	61	4	1	1	1	1	1		2	1	9		0	2	0	0	3	1	0	1	0	0	1	0	1	1	0		1		0	0		1	3	3	22	28	0
NA_004_091_H	NA_004_091_H_A01	NA_004_091	2022-01-27 09:20:00	4	4	Naoyaminit	4	Lore Apalowal	1	1	34	2	0	1	2	2	1		2	1	9		0	2	0	0	1	1	1	0	0	0	0	0	0	0	0		1		0.383165	0		1	0	0	4	4	0
NA_004_102_H	NA_004 _102_H_A01	NA_004_102	2022-01-27 10:37:00	4	4	Naoyaminit	4	Lore Apalowal	1	1	50	3	0	1	0	0	1		3	2	9		0	2	0	0	2	1	0	1	0	0	0	0	0	0	0		1		0	1	4	1	0	2	37	39	1
NA_011_006_H	NA_011_006_H_A01	NA_011_006	2022-02-18 09:03:00	4	4	Adwaramukuny	11	Lore Angikatap	1	1	54	3	0	1	0	0	1		3	2	3		1	2	0	0	2	1	1	0	0	0	0	0	0	0	0		1		0	0		1	0	39	14	53	2
NA_011_007_H	NA_011_007_H_A01	NA_011_007	2022-02-18 10:35:00	4	4	Adwaramukuny	11	Lore Angikatap	1	1	70	4	1	2	0	0	5		2	1	3		1	2	0	0	2	1	0	0	0	0	0	0	0	0	1	TB	3		0.850449	0		1	1	1	2	4	0
NA_011_012_H	NA_011_012_H_A01	NA_011_012	2022-02-18 09:26:00	4	4	Adwaramukuny	11	Lore Angikatap	1	1	35	2	0	1	0	0	1		5	2	9		0	2	1	1	5	0	0	1	0	0	0	0	0	0	0		1		0	0		1	0	33	6	39	0
NA_011_012_H	NA_011_012_H_A02	NA_011_012	2022-02-18 09:56:00	4	4	Adwaramukuny	11	Lore Angikatap	1	1	80	4	1	1	0	0	5		3	2	9		0	2	1	1	4	1	1	0	0	0	0	0	0	0	0		3		0	1	18	1	2	25	0	27	16
NA_011_014_H	NA_011_014_H_A01	NA_011_014	2022-02-18 13:56:00	4	4	Adwaramukuny	11	Lore Alokikiya	1	1	25	2	0	1	1	1	1		1	1	3		1	2	0	0	2	1	1	0	0	0	0	0	0	0	0		1		0.268542	0		1	0	2	6	8	0
NA_011_017_H	NA_011_017_H_A01	NA_011_017	2022-02-18 11:25:00	4	4	Adwaramukuny	11	Lore Alonges	1	1	53	3	0	1	0	0	1		2	1	3		1	2	0	0	2	1	1	0	0	0	0	0	0	0	0		1		0.943991	0		1	0	1	3	4	0
NA_011_018_H	NA_011_018_H_A01	NA_011_018	2022-02-18 12:08:00	4	4	Adwaramukuny	11	Lore Alonges	1	1	80	4	1	1	0	0	1		3	2	3		1	2	0	0	2	1	0	0	0	0	0	0	0	0	1	Body pain	1		0	0		1	0	24	34	58	0
NA_011_020_H	NA_011_020_H_A01	NA_011_020	2022-02-18 11:46:00	4	4	Adwaramukuny	11	Lore Alonges	1	1	70	4	1	1	0	0	1		3	2	9		0	2	0	0	4	1	1	0	0	0	0	0	0	0	0		1		0.268542	0		1	0	9	3	12	0
NA_011_034_H	NA_011_034_H_A01	NA_011_034	2022-02-18 14:57:00	4	4	Adwaramukuny	11	Lore Alokikiya	1	1	47	3	0	1	0	0	1		3	2	3		1	2	0	0	2	1	0	0	0	0	0	0	0	0	1	Body pain	1		0	0		1	0	5	7	12	0
NA_011_037_H	NA_011_037_H_A01	NA_011_037	2022-02-18 12:41:00	4	4	Adwaramukuny	11	Lore Angoles	1	1	69	4	1	1	0	0	1		2	1	4		2	2	0	0	4	1	0	0	1	0	0	0	0	0	0		1		0	0		1	1	9	8	18	0
NA_013_055_H	NA_013_055_H_A01	NA_013_055	2022-02-23 12:03:00	4	4	Nakaramwae	13	Lore Alochiyo	1	1	50	3	0	1	0	0	1		2	1	3		1	2	0	0	2	1	0	0	0	0	0	0	0	0	1	Sweating	1		0	0		1	0	2	5	7	0
NA_013_060_H	NA_013_060_H_A01	NA_013_060	2022-02-22 16:51:00	4	4	Nakaramwae	13	Lore Alochiyo	1	1	40	2	0	1	0	0	1		1	1	3		1	2	0	0	2	1	0	1	0	0	0	0	0	0	0		1		0	0		1	0	1	5	6	0
NA_013_061_H	NA_013_061_H_A02	NA_013_061	2022-02-22 11:10:00	4	4	Nakaramwae	13	Lore Angoriaale	1	1	36	2	0	1	0	0	1		2	1	3		1	2	0	0	2	1	0	0	0	0	0	0	1	0	0		1		0.368655	0		1	0	0	3	3	0
NA_013_061_H	NA_013_061_H_A01	NA_013_061	2022-02-22 10:35:00	4	4	Nakaramwae	13	Lore Angoriaale	1	1	34	2	0	2	0	0	2		2	1	9		0	2	0	0	1	1	1	0	0	0	0	0	0	0	0		1		0.368655	0		1	0	1	4	5	0
NA_013_068_H	NA_013_068_H_A01	NA_013_068	2022-02-23 13:05:00	4	4	Nakaramwae	13	Lore Lochiyo	1	1	34	2	0	1	0	0	1		2	1	3		1	2	0	0	2	1	0	1	0	0	0	0	0	0	0		1		0	0		1	0	1	1	2	0
NA_013_073_H	NA_013_073_H_A01	NA_013_073	2022-02-22 12:47:00	4	4	Nakaramwae	13	Lore Amerinyang	1	1	42	2	0	1	0	0	1		2	1	3		1	2	0	0	2	1	0	1	0	0	0	0	0	0	0		1		0.114623	0		1	0	0	1	1	0
NA_013_075_H	NA_013_075_H_A02	NA_013_075	2022-02-22 15:44:00	4	4	Nakaramwae	13	Lore Amerinyang	1	1	79	4	1	1	0	0	5		3	2	9		0	2	0	0	1	1	0	0	0	0	1	0	0	0	0		1		0	0		1	13	25	4	42	0
NA_013_075_H	NA_013_075_H_A01	NA_013_075	2022-02-22 15:40:00	4	4	Nakaramwae	13	Lore Amerinyang	1	1	39	2	0	1	0	0	1		2	1	3		1	2	0	0	4	1	0	1	0	0	0	0	0	0	1	Body pain	1		0	0		1	0	0	1	1	0
NA_013_082_H	NA_013_082_H_A01	NA_013_082	2022-02-23 10:48:00	4	4	Nakaramwae	13	Lore Lochiyo	1	1	37	2	0	1	0	0	1		2	1	3		1	2	0	0	2	1	1	0	0	0	0	0	0	0	0		1		0	0		1	2	0	2	4	0
NA_013_084_H	NA_013_084_H_A02	NA_013_084	2022-02-22 13:33:00	4	4	Nakaramwae	13	Lore Amerinyang	1	1	20	1	0	1	0	0	3		3	2	3		1	2	0	0	2	1	0	1	0	0	0	0	0	0	0		3	Teenage girls' hut	0.448054	0		1	0	3	1	4	0
NA_013_084_H	NA_013_084_H_A01	NA_013_084	2022-02-22 13:19:00	4	4	Nakaramwae	13	Lore Amerinyang	1	1	46	3	0	1	0	0	1		3	2	7		3	2	0	0	4	1	0	0	0	0	0	0	1	0	1	Joint pain	1		0.448054	0		1	1	5	5	11	0
NA_017_038_H	NA_017_038_H_A01	NA_017_038	2022-03-14 13:56:00	4	4	Lopuu	17	Lore Lokiteded	1	1	45	3	0	1	0	0	1		2	1	3		1	2	0	0	2	1	1	0	0	0	0	0	0	0	0		1		0.268542	0		1	0	0	1	1	0
NA_017_040_H	NA_017_040_H_A01	NA_017_040	2022-03-14 12:11:00	4	4	Lopuu	17	Lore Lokiteded	1	1	53	3	0	1	0	0	1		3	2	3		1	2	0	0	1	1	1	0	0	0	0	0	0	0	0		1		0.268542	0		1	0	0	1	1	0
NA_017_049_H	NA_017_049_H_A01	NA_017_049	2022-03-11 12:33:00	4	4	Lopuu	17	Lore Alokol	1	1	48	3	0	1	0	0	1		3	2	3		1	2	0	0	2	1	0	1	0	0	0	0	0	0	0		1		0	0		1	6	8	11	25	0
NA_017_054_H	NA_017_054_H_A01	NA_017_054	2022-03-11 14:25:00	4	4	Lopuu	17	Lore Apalomoe	1	1	68	4	1	1	0	0	1		3	2	3		1	2	1	1	2	1	1	0	0	0	0	0	0	0	0		1		0.268542	0		1	2	2	0	4	0
NA_017_056_H	NA_017_056_H_A01	NA_017_056	2022-03-11 10:21:00	4	4	Lopuu	17	Lore Alokol	1	1	92	4	1	1	0	0	1		3	2	9		0	2	1	1	2	1	1	0	0	0	0	0	0	0	0		1		0	0		1	4	18	11	33	0
NA_017_077_H	NA_017_077_H_A02	NA_017_077	2022-03-11 10:09:00	4	4	Lopuu	17	Lore Alokol	1	1	34	2	0	1	0	0	1		1	1	3		1	2	0	0	2	1	0	0	1	0	0	0	0	0	0		1		0.448054	0		1	3	7	29	39	0
NA_017_077_H	NA_017_077_H_A01	NA_017_077	2022-03-11 09:22:00	4	4	Lopuu	17	Lore Alokol	1	1	45	3	0	2	1	1	2		1	1	2		4	2	0	0	2	1	1	0	0	0	0	0	0	0	0		1		0.448054	0		1	31	11	20	62	0
NA_017_082_H	NA_017_082_H_A01	NA_017_082	2022-03-11 16:16:00	4	4	Lopuu	17	Lore Apalomoe	1	1	33	2	0	1	0	0	1		2	1	3		1	2	0	0	2	1	1	0	0	0	0	0	0	0	0		1		0.273053	0		1	0	0	2	2	0
NA_004_032_H	NA_004_032_H_A01	NA_004_032	2022-01-28 09:01:00	4	4	Naoyaminit	4	Lore Alouro	1	1	45	3	0	1	1	1	1		2	1	3		1	2	0	0	4	1	0	0	0	0	0	0	0	0	1	Hepatitis C	1		0	1	1	1	0	0	25	25	0
NA_011_026_H	NA_011_026_H_A01	NA_011_026	2022-02-18 13:07:00	4	4	Adwaramukuny	11	Lore Alokooruk	1	1	75	4	1	1	0	0	1		2	1	9		0	2	0	0	4	1	0	1	0	0	0	0	0	0	0		1		0	0		1	0	0	3	3	0
NA_008_009_H	NA_008_009_H_A01	NA_008_009	2022-02-07 11:11:00	4	5	Naronit	8	Lore Alokawa	1	1	31	2	0	1	0	0	1		2	1	8		3	2	0	0	2	1	0	0	0	0	0	0	0	1	0		1		0	0		1	0	0	3	3	0
NA_008_011_H	NA_008_011_H_A01	NA_008_011	2022-02-08 10:32:00	4	5	Naronit	8	Lore Ateko	1	1	23	1	0	1	0	0	1		2	1	3		1	2	0	0	4	1	0	0	0	0	0	0	0	0	1	Body pain	1		0.114623	0		1	0	1	2	3	0
NA_008_019_H	NA_008_019_H_A01	NA_008_019	2022-02-07 11:48:00	4	5	Naronit	8	Lore Alokawa	1	1	55	3	0	1	0	0	1		2	1	3		1	2	0	0	2	1	1	0	0	0	0	0	0	0	0		1		0	0		1	4	5	36	45	0
NA_008_029_H	NA_008_029_H_A01	NA_008_029	2022-02-07 10:07:00	4	5	Naronit	8	Lore Amaide	1	1	29	2	0	2	0	0	1		1	1	3		1	2	0	0	2	1	0	1	0	0	0	0	0	0	0		1		0.268542	0		1	0	0	4	4	0
NA_008_036_H	NA_008_036_H_A01	NA_008_036	2022-02-07 12:24:00	4	5	Naronit	8	Lore Akodet	1	1	64	4	1	1	0	0	1		3	2	3		1	2	0	0	2	1	0	0	0	0	1	0	0	0	0		1		0.268542	0		1	0	9	5	14	0
NA_008_039_H	NA_008_039_H_A01	NA_008_039	2022-02-07 13:00:00	4	5	Naronit	8	Lore Ateko	1	1	40	2	0	1	0	0	1		1	1	3		1	2	0	0	2	1	1	0	0	0	0	0	0	0	0		1		0.268542	0		1	0	9	5	14	0
NA_008_050_H	NA_008_050_H_A01	NA_008_050	2022-02-08 09:59:00	4	5	Naronit	8	Lore Akodet	1	1	42	2	0	1	1	1	1		5	2	3		1	2	0	0	2	1	1	0	0	0	0	0	0	0	0		1		0	0		1	7	6	7	20	0
NA_010_042_H	NA_010_042_H_A03	NA_010_042	2022-02-14 14:18:00	4	5	Loolim	10	Lore Alokoi	0	1	76	4	1	1	0	0	6	Grand parent	3	2	9		0	2	0	0	4	1	0	0	0	0	0	1	0	0	0		1		0	1	2	1	3	8	7	18	2
NA_010_042_H	NA_010_042_H_A02	NA_010_042	2022-02-14 14:14:00	4	5	Loolim	10	Lore Alokoi	0	1	20	1	0	1	0	0	4		4	2	9		0	2	1	1	5	0	1	0	0	0	0	0	0	0	0		1		0	0		1	0	1	3	4	2
NA_010_056_H	NA_010_056_H_A01	NA_010_056	2022-02-15 10:52:00	4	5	Loolim	10	Not Applicable	0	1	42	2	0	1	0	0	1		1	1	3		1	2	0	0	2	1	1	0	0	0	0	0	0	0	0		1		0	0		1	0	0	3	3	0
NA_010_072_H	NA_010_072_H_A02	NA_010_072	2022-02-15 13:24:00	4	5	Loolim	10	Not Applicable	0	1	68	4	1	1	0	0	5		3	2	9		0	2	0	0	4	1	1	0	0	0	0	0	0	0	0		1		0.268542	0		1	0	1	0	1	0
NA_010_072_H	NA_010_072_H_A01	NA_010_072	2022-02-15 13:16:00	4	5	Loolim	10	Not Applicable	0	1	47	3	0	1	3	2	1		2	1	7		3	2	0	0	4	1	0	0	0	0	0	0	0	0	1	High blood pressure	1		0.268542	0		1	0	0	1	1	0
NA_010_075_H	NA_010_075_H_A01	NA_010_075	2022-02-14 12:09:00	4	5	Loolim	10	Lore Alokoi	1	1	28	2	0	1	0	0	1		1	1	3		1	2	0	0	4	1	1	0	0	0	0	0	0	0	0		1		0	0		1	3	3	11	17	0
NA_010_095_H	NA_010_095_H_A02	NA_010_095	2022-02-15 14:35:00	4	5	Loolim	10	Not Applicable	0	1	38	2	0	1	2	2	3		5	2	9		0	2	0	0	4	1	0	0	0	0	0	0	1	0	0		5	Neighbor's hut	0	0		1	0	0	1	1	0
NA_010_096_H	NA_010_096_H_A02	NA_010_096		4	5	Loolim	10	Not Applicable	0	1	70	4	1	1	0	0	6	Daughter-In-law	3	2	9		0	2	0	0	4	1	1	0	0	0	0	0	0	0	0		1		0	0		1	0	0	1	1	0
NA_010_104_H	NA_010_104_H_A02	NA_010_104	2022-02-15 07:37:00	4	5	Loolim	10	Not Applicable	0	1	32	2	0	1	1	1	1		1	1	3		1	2	0	0	4	1	1	0	0	0	0	0	0	0	0		1		0.835729	0		1	0	3	3	6	0
NA_010_104_H	NA_010_104_H_A01	NA_010_104	2022-02-15 07:27:00	4	5	Loolim	10	Not Applicable	0	1	33	2	0	2	3	2	2		1	1	3		1	2	0	0	2	1	1	0	0	0	0	0	0	0	0		1		0.835729	0		1	0	0	1	1	0
NA_010_113_H	NA_010_113_H_A01	NA_010_113	2022-02-14 13:53:00	4	5	Loolim	10	Lore Alokoi	1	1	27	2	0	1	2	2	1		2	1	3		1	2	0	0	4	1	1	0	0	0	0	0	0	0	0		1		0	0		1	0	0	0	0	0
NA_010_114_H	NA_010_114_H_A01	NA_010_114	2022-02-17 10:37:00	4	5	Loolim	10	Not Applicable	0	1	40	2	0	1	0	0	1		1	1	3		1	2	0	0	4	1	1	0	0	0	0	0	0	0	0		1		0	0		1	0	0	2	2	0
NA_014_005_H	NA_014_005_H_A01	NA_014_005	2022-03-01 13:34:00	4	5	Naoi	14	Lore Aichongat	1	1	30	2	0	1	0	0	1		1	1	3		1	2	0	0	2	1	0	0	0	0	0	0	0	0	1	Surgical wound	1		0.268542	0		1	0	0	5	5	0
NA_014_011_H	NA_014_011_H_A01	NA_014_011	2022-02-28 14:40:00	4	5	Naoi	14	Lore Keekwaputh	1	1	32	2	0	1	0	0	1		1	1	3		1	2	0	0	2	1	0	1	0	0	0	0	0	0	0		1		0	0		1	0	0	2	2	0
NA_014_040_H	NA_014_040_H_A01	NA_014_040	2022-03-01 14:48:00	4	5	Naoi	14	Lore Aichongat	1	1	38	2	0	1	1	1	1		1	1	3		1	2	0	0	3	1	0	1	0	0	0	0	0	0	0		1		0.556315	0		1	0	0	2	2	0
NA_014_048_H	NA_014_048_H_A02	NA_014_048	2022-02-28 13:10:00	4	5	Naoi	14	Lore Keekwaputh	1	1	55	3	0	1	0	0	2		1	1	3		1	2	0	0	2	1	0	1	0	0	0	0	0	0	0		1		0	0		1	0	3	7	10	0
NA_014_063_H	NA_014_063_H_A01	NA_014_063	2022-02-28 16:05:00	4	5	Naoi	14	Lore Keekwaputh	1	1	43	2	0	1	0	0	1		2	1	3		1	2	0	0	2	1	0	0	0	0	0	0	1	0	0		1		0	1	2	1	7	5	22	34	0
NA_014_063_H	NA_014_063_H_A02	NA_014_063	2022-02-28 16:18:00	4	5	Naoi	14	Lore Keekwaputh	1	1	72	4	1	2	0	0	2		2	1	3		1	2	0	0	2	1	0	0	1	0	0	0	0	0	0		1		0	0		1	6	8	10	24	0
NA_014_065_H	NA_014_065_H_A01	NA_014_065	2022-02-28 09:31:00	4	5	Naoi	14	Lore Aichongat	1	1	35	2	0	1	3	2	1		5	2	9		0	2	1	1	1	1	0	0	0	0	0	0	0	0	1	Urinary Bladder problem	1		0	0		1	7	20	11	38	0
NA_014_065_H	NA_014_065_H_A02	NA_014_065	2022-02-28 09:39:00	4	5	Naoi	14	Lore Aichongat	1	1	60	3	0	1	0	0	5		3	2	9		0	2	1	1	1	1	0	1	0	0	0	0	0	0	0		1		0	0		1	3	2	15	20	0
NA_014_077_H	NA_014_077_H_A01	NA_014_077	2022-02-28 13:52:00	4	5	Naoi	14	Lore Keekwaputh	1	1	44	2	0	1	0	0	1		2	1	3		1	2	0	0	2	1	1	0	0	0	0	0	0	0	0		1		0	0		1	0	0	1	1	0
NA_014_080_H	NA_014_080_H_A01	NA_014_080	2022-03-01 12:08:00	4	5	Naoi	14	Lore Keekwaputh	1	1	70	4	1	1	1	1	1		3	2	9		0	2	1	1	2	1	0	1	0	0	0	0	0	0	0		1		0	0		1	0	5	1	6	1
NA_014_083_H	NA_014_083_H_A01	NA_014_083	2022-03-01 16:41:00	4	5	Naoi	14	Lore Aichongat	1	1	48	3	0	1	0	0	1		1	1	3		1	2	0	0	2	1	0	0	0	0	0	0	0	0	1	Joint pain	1		0	1	7	1	16	47	3	66	5
NA_014_083_H	NA_014_083_H_A02	NA_014_083	2022-03-01 16:52:00	4	5	Naoi	14	Lore Aichongat	1	1	18	1	0	1	1	1	6	Grand child	1	1	3		1	2	0	0	3	1	0	1	0	0	0	0	0	0	1	Some times feels dizzy	3		0	0		1	0	17	4	21	0
NA_015_023_H	NA_015_023_H_A02	NA_015_023	2022-03-03 15:12:00	4	5	Naitakosowan	15	Lore Apaepela	1	1	60	3	0	2	2	2	1		2	1	3		1	2	0	0	2	1	1	0	0	0	0	0	0	0	0		1		0.273053	1	4	1	14	106	1	121	3
NA_015_023_H	NA_015_023_H_A01	NA_015_023	2022-03-03 15:18:00	4	5	Naitakosowan	15	Lore Apaepela	1	1	45	3	0	1	1	1	2		2	1	3		1	2	0	0	2	1	1	0	0	0	0	0	0	0	0		1		0.273053	0		1	0	0	7	7	0
NA_015_029_H	NA_015_029_H_A01	NA_015_029	2022-03-03 17:32:00	4	5	Naitakosowan	15	Lore Apakoelo	1	1	40	2	0	1	0	0	1		3	2	9		0	2	0	0	2	1	1	0	0	0	0	0	0	0	0		1		0	0		1	0	17	2	19	1
NA_015_037_H	NA_015_037_H_A01	NA_015_037	2022-03-03 09:32:00	4	5	Naitakosowan	15	Lore Apangaari	1	1	41	2	0	1	0	0	1		3	2	9		0	2	1	1	2	1	0	0	0	0	0	0	0	0	1	HIV/AIDS	1		0	0		1	1	0	2	3	0
NA_015_066_H	NA_015_066_H_A02	NA_015_066	2022-03-03 10:00:00	4	5	Naitakosowan	15	Lore Apangaari	1	1	60	3	0	2	2	2	2		1	1	9		0	2	0	0	1	1	0	1	0	0	0	0	0	0	1	TB	1		0	0		1	0	1	2	3	0
NA_015_066_H	NA_015_066_H_A01	NA_015_066	2022-03-03 09:57:00	4	5	Naitakosowan	15	Lore Apangaari	1	1	50	3	0	1	0	0	1		1	1	3		1	2	1	1	2	1	1	0	0	0	0	0	0	0	0		1		0	0		1	3	5	4	12	0
NA_015_077_H	NA_015_077_H_A01	NA_015_077	2022-03-04 11:20:00	4	5	Naitakosowan	15	Lore Kaakol	1	1	34	2	0	1	0	0	1		2	1	3		1	2	0	0	2	1	0	1	0	0	0	0	0	0	0		1		0	0		1	0	0	26	26	3
NA_015_018_H	NA_015_018_H_A01	NA_015_018	2022-03-17 14:30:00	4	5	Naitakosowan	15	Lore Apangaari	1	1	47	3	0	2	1	1	2		2	1	3		1	2	0	0	1	1	0	1	0	0	0	0	0	0	0		1		0.268542	0		1	3	38	10	51	5
NA_015_078_H	NA_015_078_H_A02		2022-03-04 10:07:00	4	5	Naitakosowan	15	Lore Kaakol		1	46	3	0	1	0	0	2		2	1	3		1	2	0	0	3	1	0	0	0	0	0	0	0	0	1	Brucellosis	5	Mother's hut		0		1	1	0	1	2	0
NA_009_004_H	NA_009_004_H_A02	NA_009_004	2022-02-10 10:56:00	4	7	Longaroi	9	Lore Angimiroo	1	1	79	4	1	1	0	0	3		3	2	9		0	2	0	0	2	1	1	0	0	0	0	0	0	0	0		1		0	0		1	0	0	1	1	0
NA_009_004_H	NA_009_004_H_A01	NA_009_004	2022-02-10 10:46:00	4	7	Longaroi	9	Lore Angimiroo	1	1	55	3	0	1	0	0	1		2	1	3		1	2	0	0	2	1	1	0	0	0	0	0	0	0	0		1		0	0		1	0	1	2	3	0
NA_009_012_H	NA_009_012_H_A01	NA_009_012	2022-02-10 11:11:00	4	7	Longaroi	9	Lore Angimiroo	1	1	49	3	0	1	0	0	1		2	1	3		1	2	0	0	4	1	1	1	0	0	0	0	0	0	0		1		0	0		1	0	0	4	4	0
NA_009_019_H	NA_009_019_H_A01	NA_009_019	2022-02-11 11:04:00	4	7	Longaroi	9	Lore Kookudet	1	1	34	2	0	1	0	0	1		2	1	3		1	2	0	0	4	1	1	0	0	0	0	0	0	0	0		1		0.268542	0		1	0	0	2	2	0
NA_009_032_H	NA_009_032_H_A01	NA_009_032	2022-02-10 12:48:00	4	7	Longaroi	9	Lore Angimiroo	1	1	30	2	0	1	0	0	1		2	1	3		1	2	0	0	4	1	1	0	0	0	0	0	0	0	0		1		0	0		1	2	3	10	15	1
NA_009_057_H	NA_009_057_H_A01	NA_009_057	2022-02-10 14:53:00	4	7	Longaroi	9	Lore Aloteng	1	1	25	2	0	1	1	1	1		1	1	3		1	2	0	0	4	1	1	0	0	0	0	0	0	0	0		1		0.448054	0		1	1	0	2	3	0
NA_009_066_H	NA_009_066_H_A01	NA_009_066	2022-02-11 11:32:00	4	7	Longaroi	9	Lore Kaalbert	1	1	30	2	0	1	0	0	1		2	1	3		1	2	0	0	4	1	0	0	0	0	0	0	0	1	0		1		0.179511	0		1	0	0	3	3	0
NA_009_069_H	NA_009_069	NA_009_069	2022-02-10 15:29:00	4	7	Longaroi	9	Lore Akanyangareng	1	1	42	2	0	1	0	0	1		2	1	3		1	2	0	0	4	1	1	0	0	0	0	0	0	0	0		1		0	0		1	0	0	5	5	0
NA_009_071_H	NA_009_071_H_A01	NA_009_071	2022-02-10 08:50:00	4	7	Longaroi	9	Lore Kaamunyinakori	1	1	30	2	0	1	0	0	1		1	1	3		1	2	0	0	4	1	1	0	0	0	0	0	0	0	0		1		0	0		1	2	2	15	19	0
NA_009_082_H	NA_009_081_H_A01	NA_009_082	2022-02-11 09:12:00	4	7	Longaroi	9	Lore Kaamunyinakori	1	1	27	2	0	1	1	1	1		1	1	3		1	2	0	0	5	0	0	0	0	0	0	0	1	0	0		1		0	0		1	0	0	1	1	0
NA_009_031_H	NA_009_031_H_A01	NA_009_031	2022-02-11 14:34:00	4	7	Longaroi	9	Lore Angimiroo	1	1	40	2	0	1	0	0	1		2	1	3		1	2	0	0	2	1	1	0	0	0	0	0	0	0	0		1		0.114623	0		1	1	3	9	13	0
NA_009_079_H	NA_009_079_H_A01	NA_009 _079	2022-02-11 13:18:00	4	7	Longaroi	9	Lore Alomilimil	1	1	45	3	0	1	0	0	1		1	1	3		1	2	0	0	4	1	1	0	0	0	0	0	0	0	0		1		0.114623	0		1	0	2	1	3	0
NA_023_004_H	NA_023_004_H_A01	NA_023_004	2022-04-03 09:24:00	11	1	Kotipe	23	Not Applicable	0	0	47	3	0	2	0	0	2		2	1	3		1	2	0	0	1	1	1	0	0	0	0	0	0	0	0		1		0.541595	0		0
NA_023_006_H	NA_023_006_H_A01	NA_023_006	2022-04-02 12:49:00	11	1	Kotipe	23	Not Applicable	0	0	43	2	0	1	0	0	1		2	1	3		1	2	0	0	2	1	1	0	0	0	0	0	0	0	0		1		0.835939	0		0
NA_023_009_H	NA_023_009_H_A01	NA_023_009	2022-04-02 14:17:00	11	1	Kotipe	23	Not Applicable	0	0	64	4	1	1	0	0	2		2	1	3		1	2	0	0	5	0	0	0	0	0	0	0	1	0	0		1		0.114623	0		0
NA_023_014_H	NA_022_014_H_A01	NA_023_014	2022-04-03 14:24:00	11	1	Kotipe	23	Not Applicable	0	0	44	2	0	1	0	0	1		5	2	3		1	2	0	0	1	1	0	1	0	0	0	0	0	0	0		1		0	0		0
NA_023_015_H	NA_023_015_H_A01	NA_023_015	2022-04-03 14:24:00	11	1	Kotipe	23	Not Applicable	0	0	34	2	0	2	0	0	1		2	1	3		1	2	0	0	2	1	1	0	0	0	0	0	0	0	0		1		0.656218	0		0
NA_023_019_H	NA_023_019_H_A01	NA_023_019	2022-04-02 15:47:00	11	1	Kotipe	23	Not Applicable	0	0	34	2	0	1	0	0	1		2	1	3		1	2	0	0	2	1	0	1	0	0	0	0	0	0	0		1		0	0		0
NA_023_022_H	NA_023_022_H_A01	NA_023_022	2022-04-03 11:37:00	11	1	Kotipe	23	Not Applicable	0	0	36	2	0	1	1	1	2		1	1	3		1	2	0	0	1	1	0	1	0	0	0	0	0	0	0		1		0.273053	0		0
NA_023_025_H	NA_023_025_H_A01	NA_023_025	2022-04-02 09:17:00	11	1	Kotipe	23	Not Applicable	0	0	52	3	0	1	0	0	1		2	1	3		1	2	0	0	5	0	0	1	0	0	0	0	0	0	0		1		0.835729	0		0
NA_023_026_H	NA_023_026_H_A01	NA_023_026	2022-04-02 15:14:00	11	1	Kotipe	23	Not Applicable	0	0	40	2	0	1	0	0	1		2	1	3		1	2	0	0	2	1	1	0	0	0	0	0	0	0	0		1		0.943991	0		0
NA_023_028_H	NA_023_028_H_A01	NA_023_028	2022-04-02 14:22:00	11	1	Kotipe	23	Not Applicable	0	0	39	2	0	1	0	0	1		2	1	3		1	2	1	1	2	1	1	0	0	0	0	0	0	0	0		1		0.268542	0		0
NA_023_029_H	NA_023_029_H_A01	NA_023_029	2022-04-03 10:38:00	11	1	Kotipe	23	Not Applicable	0	0	91	4	1	1	0	0	1		3	2	9		0	2	0	0	2	1	0	1	0	0	1	0	0	0	0		1		0	0		0
NA_023_030_H	NA_023_030_H_A01	NA_023_030	2022-04-03 10:13:00	11	1	Kotipe	23	Not Applicable	0	0	27	2	0	1	0	0	1		2	1	3		1	2	0	0	2	1	1	0	0	0	0	0	0	0	0		1		0.656218	0		0
NA_023_031_H	NA_023_031_H_A01	NA_023_031	2022-04-03 09:19:00	11	1	Kotipe	23	Not Applicable	0	0	58	3	0	1	0	0	1		3	2	3		1	2	0	0	5	0	1	0	0	0	0	0	0	0	0		1		0.721107	0		0
NA_023_033_H	NA_023_033_H_A01	NA_023_033	2022-04-02 11:05:00	11	1	Kotipe	23	Not Applicable	0	0	18	1	0	1	0	0	3		1	1	9		0	2	0	0	2	1	1	0	0	0	0	0	0	0	0		3	Separate hut	0.656218	0		0
NA_023_034_H	NA_023_034_H_A01	NA_023_034	2022-04-02 11:26:00	11	1	Kotipe	23	Not Applicable	0	0	38	2	0	1	0	0	1		2	1	9		0	2	0	0	5	0	0	0	1	0	0	0	0	0	0		1		0.541595	0		0
NA_023_036_H	NA_023_036_H_A01	NA_023_036	2022-04-02 09:29:00	11	1	Kotipe	23	Not Applicable	0	0	38	2	0	1	0	0	2		2	1	3		1	2	0	0	5	0	1	0	0	0	0	0	0	0	0		1		0.541595	0		0
NA_023_037_H	NA_023_037_H_A01	NA_023_037	2022-04-03 11:43:00	11	1	Kotipe	23	Not Applicable	0	0	50	3	0	1	0	0	6	Sister-In-law	2	1	3		1	2	0	0	5	0	0	0	0	0	0	0	1	0	0		1		0.452564	0		0
NA_023_038_H	NA_023_038_H_A01	NA_023_038	2022-04-02 12:14:00	11	1	Kotipe	23	Not Applicable	0	0	33	2	0	1	0	0	2		2	1	3		1	2	0	0	2	1	0	1	0	0	0	0	0	0	0		1		0.268542	0		0
NA_023_039_H	NA_023_039_H_A01	NA_023_039	2022-04-03 13:10:00	11	1	Kotipe	23	Not Applicable	0	0	40	2	0	1	0	0	1		2	1	3		1	2	0	0	2	1	1	0	0	0	0	0	0	0	0		1		0.273053	0		0
NA_023_041_H	NA_023_041_H_A01	NA_023_041	2022-04-02 10:11:00	11	1	Kotipe	23	Not Applicable	0	0	70	4	1	1	0	0	1		2	1	9		0	2	1	1	2	1	1	0	0	0	0	0	0	0	0		1		0.273053	0		0
NA_023_042_H	NA_023_042_H_A01	NA_023_042	2022-04-02 14:45:00	11	1	Kotipe	23	Not Applicable	0	0	47	3	0	2	0	0	2		2	1	3		1	2	0	0	2	1	1	1	0	0	0	0	0	0	0		1		0	0		0
NA_023_043_H	NA_023_043_H_A01	NA_023_043	2022-04-03 12:08:00	11	1	Kotipe	23	Not Applicable	0	0	67	4	1	2	0	0	6	Father	2	1	9		0	2	1	1	1	1	0	0	0	0	0	0	0	0	1	TB	5	Store	0.387676	0		0
NA_023_043_H	NA_023_043_H_A03	NA_023_043	2022-04-03 12:14:00	11	1	Kotipe	23	Not Applicable	0	0	25	2	0	2	2	2	4		1	1	3		1	2	0	0	1	1	0	1	0	0	0	0	0	0	0		5	Compound	0.387676	0		0
NA_023_044_H	NA_023_044_H_A01	NA_023_044	2022-04-02 11:14:00	11	1	Kotipe	23	Not Applicable	0	0	22	1	0	1	0	0	1		2	1	7		3	2	0	0	5	0	0	0	0	0	0	0	0	1	0		1		0.656218	0		0
NA_023_046_H	NA_023_046_H_A01	NA_023_046	2022-04-02 16:32:00	11	1	Kotipe	23	Not Applicable	0	0	27	2	0	1	0	0	1		2	1	3		1	2	0	0	5	0	1	0	0	0	0	0	0	0	0		1		0	0		0
NA_023_047_H	NA_023_047_H_A01	NA_023_047	2022-04-02 16:39:00	11	1	Kotipe	23	Not Applicable	0	0	50	3	0	1	0	0	1		2	1	3		1	2	0	0	2	1	1	0	0	0	0	0	0	0	0		1		0	0		0
NA_023_050_H	NA_023_050_H_A01	NA_023_050	2022-04-02 13:39:00	11	1	Kotipe	23	Not Applicable	0	0	52	3	0	1	0	0	1		3	2	9		0	2	0	0	5	0	0	0	0	0	0	0	0	0	1	Joint pain	1		0.268542	0		0
NA_023_054_H	NA_023_054_H_A01	NA_023_054	2022-04-02 13:37:00	11	1	Kotipe	23	Not Applicable	0	0	34	2	0	1	0	0	1		1	1	3		1	2	0	0	2	1	1	0	0	0	0	0	0	0	0		1		0.268542	0		0
NA_023_055_H	NA_023_055_H_A02	NA_023_055	2022-04-02 17:16:00	11	1	Kotipe	23	Not Applicable	0	0	30	2	0	1	0	0	1		2	1	3		1	2	0	0	2	1	0	1	0	0	0	0	0	0	0		1		0.387676	0		0
NA_023_055_H	NA_023_055_H_A01	NA_023_055	2022-04-02 17:12:00	11	1	Kotipe	23	Not Applicable	0	0	63	4	1	2	0	0	2		2	1	3		1	2	0	0	2	1	1	0	0	0	0	0	0	0	0		1		0.387676	0		0
NA_023_056_H	NA_023_042_H_A01	NA_023_056	2022-04-02 15:25:00	11	1	Kotipe	23	Not Applicable	0	0	30	2	0	1	0	0	2		1	1	3		1	2	0	0	1	1	1	0	0	0	0	0	0	0	0		1		0	0		0
NA_023_060_H	NA_023_060_H_A01	NA_023_060	2022-04-03 10:02:00	11	1	Kotipe	23	Not Applicable	0	0	20	1	0	1	0	0	1		2	1	8		3	2	0	0	2	1	0	0	0	0	0	0	0	0	1	Swollen Legs	1		0.268542	0		0
NA_023_061_H	NA_023_061_H_A01	NA_023_061	2022-04-02 12:31:00	11	1	Kotipe	23	Not Applicable	0	0	34	2	0	2	0	0	2		2	1	3		1	2	0	0	2	1	1	0	0	0	0	0	0	0	0		1		0.268542	0		0
NA_023_061_H	NA_023_061_H_A02	NA_023_061	2022-04-02 12:41:00	11	1	Kotipe	23	Not Applicable	0	0	31	2	0	1	1	1	1		2	1	3		1	2	0	0	2	1	0	1	0	0	0	0	0	0	0		1		0.268542	0		0
NA_023_062_H	NA_023_062_H_A01	NA_023_062	2022-04-02 17:16:00	11	1	Kotipe	23	Not Applicable	0	0	43	2	0	1	1	1	1		2	1	3		1	2	0	0	1	1	1	0	0	0	0	0	0	0	0		1		1.10899	0		0
NA_023_064_H	NA_023_064_H_A01	NA_023_064	2022-04-02 10:48:00	11	1	Kotipe	23	Not Applicable	0	0	42	2	0	1	0	0	2		2	1	3		1	2	0	0	2	1	1	0	0	0	0	0	0	0	0		1		0.273053	0		0
NA_023_065_H	NA_023_065_H_A01	NA_023_065	2022-04-03 11:08:00	11	1	Kotipe	23	Not Applicable	0	0	35	2	0	1	0	0	1		2	1	3		1	2	0	0	1	1	0	1	0	0	0	0	0	0	0		1		0.552676	0		0
NA_023_068_H	NA_023_068_H_A01	NA_023_068	2022-04-03 12:04:00	11	1	Kotipe	23	Not Applicable	0	0	32	2	0	1	0	0	1		1	1	3		1	2	0	0	5	0	0	1	0	0	0	0	0	0	0		1		0	0		0
NA_023_069_H	NA_023_069_H_A01	NA_023_069	2022-04-03 13:15:00	11	1	Kotipe	23	Not Applicable	0	0	23	1	0	1	1	1	1		2	1	8		3	2	1	1	1	1	1	0	0	0	0	0	0	0	0		1		0.656218	0		0
NA_023_070_H	NA_023_070_H_A01	NA_023_070	2022-04-02 11:56:00	11	1	Kotipe	23	Not Applicable	0	0	22	1	0	1	1	1	3		2	1	3		1	2	0	0	2	1	0	1	0	0	0	0	0	0	0		3		0.268542	0		0
NA_002_067_H	NA_002_067_H_A01	NA_002_067	2022-01-24 10:18:00	4	2	Loroo	2	Lore Alotukei	1	1	65	4	1	1	0	0	5	Mother-In-law	2	1	9		0	2	0	0	4	1	1	0	0	0	0	0	0	0	0		1		0.721107	0		0
NA_002_080_H	NA_002_080_H_A02	NA_002_080	2022-01-21 16:54:00	4	2	Loroo	2	Lore Kaalem	1	1	45	3	0	2	0	0	1		2	1	4		2	2	0	0	4	1	1	0	0	0	0	0	0	0	0		1		0.383165	0		0
NA_003_110_H	NA_003_110_H_A01	NA_003_110	2022-01-24 13:06:00	4	2	Naregei-Nakoreete	3	Lore Apokomol	1	1	60	3	0	2	0	0	2		2	1	4		2	2	0	0	5	0	1	0	0	0	0	0	0	0	0		1		0	0		0
NA_005_013_H	NA_005_013_H_A01	NA_005_013	2022-01-31 10:57:00	4	2	Nachuka	5	Lore Koopuwa	1	1	30	2	0	1	1	1	1		2	1	3		1	2	0	0	2	1	0	0	1	0	0	0	0	1	0		1		0	0		0
NA_005_016_H	NA_005_016_H_A01	NA_005_016	2022-01-31 14:23:00	4	2	Nachuka	5	Lore Koopuwa	1	1	38	2	0	2	0	0	1		2	1	3		1	2	0	0	4	1	0	1	0	0	0	0	0	0	0		1		0.268542	0		0
NA_006_051_H	NA_006_051_H_A02	NA_006_051	2022-02-03 11:19:00	4	2	Akwapuwa-Loluk	6	Lore Apakarengit	1	1	37	2	0	1	0	0	1		2	1	3		1	2	0	0	2	1	1	0	0	0	0	0	0	0	0		1		0.448054	0		0
NA_007_006_H	NA_007_006_H_A01	NA_007_006	2022-02-04 12:12:00	4	2	Angarab	7	Lore Aloyor	1	1	40	2	0	1	0	0	1		1	1	3		1	2	0	0	2	1	1	0	0	0	0	0	0	0	0		1		0	0		0
NA_007_020_H	NA_007_020_H_A01	NA_007_020	2022-02-04 11:53:00	4	2	Angarab	7	Lore Aloyor	1	1	22	1	0	1	0	0	1		1	1	3		1	2	0	0	2	1	1	0	0	0	0	0	0	0	0		1		0	0		0
NA_012_001_H	NA_012_001_H_A01	NA_012_001	2022-02-21 11:10:00	4	2	Naitakwae	12	Lore Apalotuko	1	1	31	2	0	1	0	0	1		2	1	7		3	2	0	0	2	1	1	0	0	0	0	0	0	0	0		1		0.448054	0		0
NA_012_005_H	NA_012_005_H_A01	NA_012_005	2022-02-21 14:53:00	4	2	Naitakwae	12	Lore Apalotom	1	1	49	3	0	2	1	1	2		1	1	3		1	2	1	1	1	1	0	0	0	0	0	0	0	0	1	Hepetatis B	1		0.383165	0		0
NA_012_005_H	NA_012_005_H_A02	NA_012_005	2022-02-21 15:21:00	4	2	Naitakwae	12	Lore Apalotom	1	1	51	3	0	1	1	1	1		1	1	5		2	2	0	0	2	1	1	0	0	0	0	0	0	0	0		1		0.383165	0		0
NA_012_012_H	NA_012_012_H_A01	NA_012_012	2022-02-21 12:56:00	4	2	Naitakwae	12	Lore Apalotom	1	1	37	2	0	1	0	0	1		2	1	7		3	2	0	0	4	1	0	0	0	0	0	0	0	1	0		1		0.114623	0		0
NA_012_029_H	NA_012_029_H_A01	NA_012_029	2022-02-21 09:34:00	4	2	Naitakwae	12	Lore Apalotuko	1	1	26	2	0	1	1	1	1		2	1	3		1	2	0	0	2	1	0	1	0	0	0	0	0	0	0		1		0.268542	0		0
NA_016_007_H	NA_016_007_H_A01	NA_016_007	2022-03-10 14:13:00	4	2	Lominit	16	Lore Achuule	1	1	26	2	0	1	1	1	1		2	1	3		1	2	0	0	2	1	0	1	0	0	0	0	0	0	0		1		0.268542	0		0
NA_016_011_H	NA_016_011_H_A01	NA_016_011	2022-03-10 12:36:00	4	2	Lominit	16	Lore Aloitanin	1	1	30	2	0	1	0	0	1		1	1	3		1	2	0	0	2	1	0	1	0	0	0	0	0	0	0		1		0	0		0
NA_016_024_H	NA_016_024_H_A01	NA_016_024	2022-03-10 11:22:00	4	2	Lominit	16	Lore Apalopale	1	1	40	2	0	1	0	0	1		1	1	3		1	2	0	0	2	1	0	0	0	0	0	0	0	0	1	Body pain	1		0.667299	0		0
NA_016_035_H	NA_016_035_H_A01	NA_016_035	2022-03-10 11:10:00	4	2	Lominit	16	Lore Apalopale	1	1	24	1	0	1	4	2	4		1	1	3		1	2	0	0	1	1	1	0	0	0	0	0	0	0	0		1		0.268542	0		0
NA_016_055_H	NA_016_055_H_A01	NA_016_055	2022-03-07 10:29:00	4	2	Lominit	16	Lore Achuule	1	1	30	2	0	2	3	2	2		1	1	8		3	2	0	0	2	1	1	0	0	0	0	0	0	0	0		1		0	0		0
NA_001_030_H	NA_001_030_H_A01	NA_001_030	2022-01-18 16:13:00	4	2	Lobei	1	Lore Kaabura	1	0	58	3	0	1	0	0	1		1	1	3		1	2	0	0	5	0	1	0	0	0	0	0	0	0	0		1		0	0		0
NA_002_044_H	NA_002_044_H_A01	NA_002_044	2022-01-21 12:03:00	4	2	Loroo	2	Lore Alorengeluka	1	0	77	4	1	1	0	0	6	Grand mother	3	2	9		0	2	1	1	5	0	0	0	0	0	0	0	0	0	1	Body pain	5	Grand mother's hut	0.268542	0		0
NA_002_044_H	NA_002_044_H_A02	NA_002_044	2022-01-21 12:10:00	4	2	Loroo	2	Lore Alorengeluka	1	0	22	1	0	1	1	1	1		1	1	8		3	2	0	0	4	1	1	0	0	0	0	0	0	0	0		1		0.268542	0		0
NA_002_059_H	NA_002_059_H_A02	NA_002_059	2022-01-21 11:29:00	4	2	Loroo	2	Lore Aichumar	1	0	72	4	1	1	0	0	6	Grand mother	3	2	9		0	2	0	0	5	0	1	0	0	0	0	0	0	0	0		5	Grand mother's hut	0.735827	0		0
NA_002_059_H	NA_002_059_H_A01	NA_002_059	2022-01-21 11:23:00	4	2	Loroo	2	Lore Aichumar	1	0	22	1	0	1	0	0	1		1	1	8		3	2	0	0	4	1	1	0	0	0	0	0	0	0	0		1		0.735827	0		0
NA_002_061_H	NA_002_061_H_A01	NA_002_061	2022-01-21 10:47:00	4	2	Loroo	2	Lore Aichumar	1	0	19	1	0	1	1	1	3	Caretaker	1	1	3		1	2	1	1	4	1	1	0	0	0	0	0	0	0	0		1	Main house 2	1.00888	0		0
NA_005_023_H	NA_005_023_H_A02	NA_005_023	2022-01-31 09:21:00	4	2	Nachuka	5	Lore Alotee	1	0	33	2	0	1	1	1	1		1	1	3		1	2	0	0	2	1	0	0	0	0	0	0	1	0	0		1		0.268542	0		0
NA_005_023_H	NA_005_023_H_A01	NA_005_023	2022-01-31 09:15:00	4	2	Nachuka	5	Lore Alotee	1	0	48	3	0	2	2	2	2		1	1	10	Catechist	4	2	1	1	2	1	1	0	0	0	0	0	0	0	0		1		0.268542	0		0
NA_005_024_H	NA_005_024_H_A01	NA_005_024	2022-02-01 09:25:00	4	2	Nachuka	5	Lore Alotee	1	0	43	2	0	1	0	0	1		1	1	3		1	2	3	1	4	1	0	0	0	0	0	0	0	0	1	Body pain	1		0	0		0
NA_005_043_H	NA_005_043_H_A01	NA_005_043	2022-01-31 13:37:00	4	2	Nachuka	5	Lore Koopuwa	1	0	32	2	0	1	0	0	3		2	1	3		1	2	1	1	2	1	1	0	0	0	0	0	0	0	0		1	Main house 3	0.273053	0		0
NA_006_011_H	NA_006_011_H_A01	NA_006_011	2022-02-03 15:25:00	4	2	Akwapuwa-Loluk	6	Lore Alotimong	1	0	41	2	0	1	0	0	1		2	1	3		1	2	0	0	2	1	1	0	0	0	0	0	0	0	0		1		0	0		0
NA_006_014_H	NA_006_014_H_A01	NA_006_014	2022-02-04 09:55:00	4	2	Akwapuwa-Loluk	6	Lore Alotimong	1	0	22	1	0	1	1	1	1		1	1	8		3	2	0	0	2	1	1	0	0	0	0	0	0	0	0		5	Grand mother's hut	0.448054	0		0
NA_006_023_H	NA_006_023_H_A01	NA_006_023	2022-02-03 09:46:00	4	2	Akwapuwa-Loluk	6	Lore Apakarengit	1	0	31	2	0	1	0	0	1		2	1	3		1	2	0	0	2	1	0	1	0	0	0	0	0	0	0		5	Neighbor's hut	0	0		0
NA_012_017_H	NA_012_017_H_A01	NA_012_017	2022-02-21 09:47:00	4	2	Naitakwae	12	Lore Apalotuko	1	0	40	2	0	1	0	0	1		2	1	7		3	2	0	0	2	1	1	0	0	0	0	0	0	0	0		1		0.383165	0		0
NA_012_019_H	NA_012_019_H_A01	NA_012_019	2022-02-21 10:43:00	4	2	Naitakwae	12	Lore Apalotuko	1	0	40	2	0	1	0	0	1		2	1	7		3	2	0	0	2	1	1	0	0	0	0	0	0	0	0		1		0.721107	0		0
NA_012_030_H	NA_012_030_H_A01	NA_012_030	2022-02-21 10:56:00	4	2	Naitakwae	12	Lore Apalotuko	1	0	20	1	0	1	0	0	4		2	1	7		3	2	0	0	2	1	1	0	0	0	0	0	0	0	0		1		0	0		0
NA_016_009_H	NA_016_009_H_A01	NA_016_009	2022-03-07 16:50:00	4	2	Lominit	16	Lore Apalopale	1	0	24	1	0	1	0	0	1		1	1	3		1	2	0	0	2	1	1	0	0	0	0	0	0	0	0		1		0.268542	0		0
NA_016_010_H	NA_016_010_H_A01	NA_016_010	2022-03-10 13:48:00	4	2	Lominit	16	Lore Achuule	1	0	35	2	0	1	0	0	1		1	1	3		1	2	0	0	2	1	0	1	0	0	0	0	0	0	0		1		0	0		0
NA_016_019_H	NA_016_019_H_A01	NA_016_019	2022-03-07 13:33:00	4	2	Lominit	16	Lore Achuule	1	0	24	1	0	1	1	1	3		2	1	3		1	2	3	1	2	1	0	1	0	0	0	0	0	0	0		5	Sister's hut	0.556315	0		0	0	0	1	1	0
NA_016_020_H	NA_016_020_H_A01	NA_016_020	2022-03-07 11:33:00	4	2	Lominit	16	Lore Achuule	1	0	60	3	0	1	0	0	1		3	2	3		1	2	0	0	2	1	0	1	0	0	0	0	0	0	0		1		0.448054	0		0	0	0	1	1	0
NA_016_029_H	NA_016_029_H_A01	NA_016_029	2022-03-10 11:31:00	4	2	Lominit	16	Lore Apalopale	1	0	53	3	0	1	0	0	1		2	1	3		1	2	0	0	2	1	0	0	0	0	0	0	0	0	1	TB	1		0.268542	0		0
NA_016_031_H	NA_016_031_H_A01	NA_016_031	2022-03-07 12:13:00	4	2	Lominit	16	Lore Loitannin	1	0	30	2	0	1	0	0	1		2	1	4		2	2	0	0	2	1	1	0	0	0	0	0	0	0	0		1		0.268542	0		0
NA_016_032_H	NA_016_032_H_A01	NA_016_032	2022-03-07 14:07:00	4	2	Lominit	16	Lore Achuule	1	0	30	2	0	1	1	1	4		2	1	8		3	2	0	0	2	1	1	0	0	0	0	0	0	0	0		1		0.562677	0		0
NA_016_040_H	NA_016_040_H_A01	NA_016_040	2022-03-10 10:00:00	4	2	Lominit	16	Lore Achuule	1	0	27	2	0	1	0	0	1		1	1	3		1	2	0	0	2	1	0	1	0	0	0	0	0	0	0		1		0	0		0
NA_016_053_H	NA_016_053_H_A01	NA_016_053	2022-03-10 10:33:00	4	2	Lominit	16	Lore Apalopale	1	0	27	2	0	1	1	1	1		2	1	3		1	2	0	0	4	1	0	1	0	0	0	0	0	0	0		1		0	0		0
NA_016_054_H	NA_016_054_H_A01	NA_016_054	2022-03-10 09:41:00	4	2	Lominit	16	Lore Achuule	1	0	60	3	0	1	0	0	1		1	1	8		3	2	0	0	2	1	0	0	0	0	0	0	1	0	1	Joint pain	1		0.541595	0		0
NA_016_054_H	NA_016_054_H_A02	NA_016_054	2022-03-10 10:05:00	4	2	Lominit	16	Lore Achuule	1	0	63	4	1	2	3	2	2		2	1	4		2	2	0	0	2	1	0	0	0	0	0	0	0	0	1	Joint pain	1		0.541595	0		0
NA_016_062_H	NA_016_062_H_A01	NA_016_062	2022-03-07 16:18:00	4	2	Lominit	16	Lore Apalopale	1	0	40	2	0	1	5	2	1		1	1	3		1	2	0	0	2	1	1	0	0	0	0	0	0	0	0		1		0	0		0
NA_016_061_H	NA_016_061_H_A01	NA_016_061	2022-03-10 13:25:00	4	2	Lominit	16	Lore Achuule	1	0	36	2	0	1	0	0	1		2	1	3		1	2	0	0	2	1	1	0	0	0	0	0	0	0	0		1		0	0		0
NA_020_005_H	NA_020_005_H_A01	NA_020_005	2022-03-18 11:01:00	5	3	Lokupoi TC-Lokitela	20	Lore Akotol	1	0	52	3	0	2	1	1	2		1	1	3		1	1	1	1	1	1	0	0	0	0	1	0	0	0	0		1		0	0		0	0	0	1	1	0
NA_020_008_H	NA_020_008_H_A02	NA_020_008	2022-03-18 15:28:00	5	3	Lokupoi TC-Lokitela	20	Lore Akotol	1	0	60	3	0	1	0	0	5		3	2	9		0	2	2	1	2	1	1	0	0	0	0	0	0	0	0		1		0	0		0
NA_020_008_H	NA_020_008_H_A01	NA_020_008	2022-03-18 15:20:00	5	3	Lokupoi TC-Lokitela	20	Lore Akotol	1	0	33	2	0	1	0	0	1		3	2	3		1	2	0	0	2	1	1	0	0	0	0	0	0	0	0		1		0	0		0
NA_020_010_H	NA_020_010_H_A01	NA_020_010	2022-03-18 12:24:00	5	3	Lokupoi TC-Lokitela	20	Lore Apaangakorio	1	0	47	3	0	1	0	0	1		3	2	3		1	2	0	0	1	1	0	0	0	0	0	0	0	0	1	Body pain	1		0	0		0
NA_020_013_H	NA_020_013_H_A01	NA_020_013	2022-03-19 16:09:00	5	3	Lokupoi TC-Lokitela	20	Lore Alokai	1	0	72	4	1	1	1	1	1		3	2	9		0	2	0	0	1	1	0	0	0	0	0	0	0	0	1	Body pain	1		0	0		0
NA_020_015_H	NA_020_015_H_A02	NA_020_015	2022-03-18 10:02:00	5	3	Lokupoi TC-Lokitela	20	Lore Akotol	1	0	27	2	0	1	0	0	1		1	1	3		1	2	0	0	2	1	1	0	0	0	0	0	0	0	0		1		0.268542	0		0
NA_020_015_H	NA_020_015_H_A01	NA_020_015	2022-03-18 09:56:00	5	3	Lokupoi TC-Lokitela	20	Lore Akotol	1	0	37	2	0	2	2	2	2		1	1	3		1	2	0	0	2	1	1	0	0	0	0	0	0	0	0		1		0.268542	0		0
NA_020_019_H	NA_020_019_H_A01	NA_020_019	2022-03-18 13:26:00	5	3	Lokupoi TC-Lokitela	20	Lore Alokai	1	0	31	2	0	1	0	0	1		1	1	3		1	2	0	0	1	1	0	1	0	0	0	0	0	0	0		1		0	0		0
NA_020_027_H	NA_020_027_H_A01	NA_020_027	2022-03-18 12:00:00	5	3	Lokupoi TC-Lokitela	20	Lore Apaangakorio	1	0	28	2	0	1	1	1	1		2	1	3		1	2	0	0	2	1	1	0	0	0	0	0	0	0	0		1		0.268542	0		0
NA_020_029_H	NA_020_029_H_A01	NA_020_029	2022-03-18 13:04:00	5	3	Lokupoi TC-Lokitela	20	Lore Apaangakorio	1	0	42	2	0	1	0	0	1		2	1	3		1	2	0	0	1	1	1	0	0	0	0	0	0	0	0		1		0.268542	0		0
NA_020_050_H	NA_020_050_H_A01	NA_020_050	2022-03-18 15:45:00	5	3	Lokupoi TC-Lokitela	20	Lore Akotol	1	0	49	3	0	1	2	2	1		3	2	3		1	2	0	0	1	1	0	1	0	0	0	0	0	0	1	HIV and Tuberculosis	1		0	0		0
NA_020_060_H	NA_020_060_H_A01	NA_020_060	2022-03-19 16:48:00	5	3	Lokupoi TC-Lokitela	20	Lore Akotol	1	0	28	2	0	1	1	1	2		1	1	3		1	2	0	0	2	1	1	0	0	0	0	0	0	0	0		1		0.541595	0		0
NA_020_067_H	NA_020_067_H_A01	NA_020_067	2022-03-18 14:08:00	5	3	Lokupoi TC-Lokitela	20	Lore Alokai	1	0	29	2	0	1	1	1	1		1	1	3		1	2	0	0	2	1	0	1	0	0	0	0	0	0	0		1		0.656427	0		0
NA_020_011_H	NA_020_011_H_A01	NA_020-011	2022-03-18 10:29:00	5	3	Lokupoi TC-Lokitela	20	Lore Akotol	1	0	34	2	0	2	2	2	1		1	1	3		1	2	0	0	4	1	1	0	0	0	0	0	0	0	0		1		0.835729	0		0
NA_020_018_H	NA_020_018_H_A01	NA_020_018	2022-03-18 13:49:00	5	3	Lokupoi TC-Lokitela	20	Lore Alokai	1	0	24	1	0	2	1	1	1		1	1	7		3	2	0	0	2	1	1	0	0	0	0	0	0	0	0		1		0.735827	0		0
NA_020_026_H	NA_020_026_H_A01	NA_020_026	2022-03-18 14:26:00	5	3	Lokupoi TC-Lokitela	20	Lore Alokai	1	0	47	3	0	2	2	2	1		1	1	3		1	2	0	0	1	1	1	0	0	0	0	0	0	0	0		1		0.448054	0		0
NA_020_026_H	NA_020_026_H_A02	NA_020_026	2022-03-18 14:29:00	5	3	Lokupoi TC-Lokitela	20	Lore Alokai	1	0	22	1	0	1	1	1	2		1	1	8		3	2	0	0	1	1	1	0	1	0	0	0	0	0	0		1		0.448054	0		0
NA_020_033_H	NA_020_033_H_A01	NA_020_033	2022-03-18 14:43:00	5	3	Lokupoi TC-Lokitela	20	Lore Akotol	1	0	42	2	0	1	0	0	1		2	1	7		3	2	0	0	1	1	1	0	0	0	0	0	0	0	0		1		0.448054	0		0
NA_020_035_H	NA_020_035_H_A01	NA_020_035	2022-03-18 16:49:00	5	3	Lokupoi TC-Lokitela	20	Lore Apaangakorio	1	0	70	4	1	1	0	0	1		3	2	3		1	2	0	0	1	1	0	1	0	0	0	0	0	0	0		1		0.268542	0		0
NA_020_042_H	NA_020_042_H_A01	NA_020_042	2022-03-18 12:46:00	5	3	Lokupoi TC-Lokitela	20	Lore Apaangakorio	1	0	33	2	0	1	1	1	1		2	1	3		1	2	0	0	1	1	0	1	0	0	1	0	0	0	1	Body pain	1		0	0		0
NA_020_043_H	NA_020_043_H_A01	NA_020_043	2022-03-19 14:52:00	5	3	Lokupoi TC-Lokitela	20	Lore Aloibok	1	0	56	3	0	1	0	0	5		2	1	3		1	2	0	0	2	1	0	0	0	0	1	0	0	0	0		3		0	0		0
NA_020_043_H	NA_020_043_H_A02	NA_020_043	2022-03-19 14:56:00	5	3	Lokupoi TC-Lokitela	20	Lore Aloibok	1	0	27	2	0	1	1	1	1		1	1	3		1	2	0	0	2	1	1	0	0	0	0	0	0	0	0		1		0	0		0
NA_020_048_H	NA_020_048_H_A01	NA_020_048	2022-03-19 14:28:00	5	3	Lokupoi TC-Lokitela	20	Lore Aloibok	1	0	47	3	0	1	1	1	1		5	2	3		1	2	0	0	2	1	1	0	0	0	0	0	0	0	0		1		0	0		0
NA_020_054_H	NA_020_054_H_A01	NA_020_054	2022-03-18 16:21:00	5	3	Lokupoi TC-Lokitela	20	Lore Akotol	1	0	36	2	0	2	0	0	1		2	1	3		1	2	0	0	1	1	1	0	0	0	0	0	0	0	0		1		0	0		0
NA_020_063_H	NA_020_063_H_A01	NA_020_063	2022-03-19 17:05:00	5	3	Lokupoi TC-Lokitela	20	Lore Akotol	1	0	78	4	1	1	0	0	1		2	1	3		1	2	0	0	2	1	0	1	0	0	0	0	0	0	0		1		0	0		0
NA_020_068_H	NA_020_068_H_A01	NA_020_068	2022-03-19 15:43:00	5	3	Lokupoi TC-Lokitela	20	Lore Apaangakorio	1	0	37	2	0	1	0	0	1		2	1	3		1	2	0	0	1	1	0	1	0	0	0	0	0	0	0		1		0	0		0
NA_004_004_H	NA_004_004_H_A01	NA_004_004	2022-01-27 15:43:00	4	4	Naoyaminit	4	Lore Aporengereng	1	1	22	1	0	1	1	1	1		1	1	9		0	2	0	0	5	0	0	0	0	0	0	0	0	0	1	Body pain	1		0	0		0
NA_004_044_H	NA_004_044_H_A02	NA_004_044	2022-01-28 12:39:00	4	4	Naoyaminit	4	Lore Aporengereng	1	1	32	2	0	2	4	2	2		2	1	9		0	2	0	0	5	0	1	0	0	0	0	0	0	0	0		1		0.541595	0		0
NA_004_077_H	NA_004_077_H_A03	NA_004_077	2022-01-27 12:02:00	4	4	Naoyaminit	4	Lore Apalowal	1	1	55	3	0	2	0	0	2		1	1	9		0	2	1	1	3	1	1	1	0	0	0	0	0	0	0		1		0	0		0
NA_011_008_H	NA_011_008_H_A01	NA_011_008	2022-02-18 14:33:00	4	4	Adwaramukuny	11	Lore Alokikiya	1	1	28	2	0	1	0	0	1		3	2	3		1	2	0	0	2	1	0	1	0	0	0	0	0	0	0		1		0	0		0
NA_011_016_H	NA_011_016_H_A01	NA_011_016	2022-02-18 12:44:00	4	4	Adwaramukuny	11	Lore Alonges	1	1	22	1	0	1	1	1	1		2	1	3		1	2	0	0	4	1	1	0	0	0	0	0	0	0	0		1		0.268542	1		0
NA_013_045_H	NA_013_045_H_A01	NA_013_045	2022-02-22 11:25:00	4	4	Nakaramwae	13	Lore Angoriaale	1	1	39	2	0	1	0	0	1		2	1	3		1	2	0	0	4	1	0	0	1	0	0	0	0	0	1	Brucellosis	1		0.562677	0		0
NA_013_062_H	NA_013_062_H_A01	NA_013_062	2022-02-23 12:57:00	4	4	Nakaramwae	13	Lore Alochiyo	1	1	64	4	1	1	0	0	1		3	2	9		0	2	0	0	5	0	0	0	1	0	0	0	0	0	0		1		0.114623	0		0
NA_013_080_H	NA_013_080_H_A01	NA_013_080	2022-02-22 14:47:00	4	4	Nakaramwae	13	Lore Amerinyang	1	1	38	2	0	1	0	0	1		2	1	3		1	2	0	0	2	1	0	1	0	0	0	0	0	0	0		1		0	0		0
NA_013_089_H	NA_013_089_H_A01	NA_013_089	2022-02-22 12:06:00	4	4	Nakaramwae	13	Lore Angoriaale	1	1	36	2	0	1	0	0	1		2	1	9		0	2	0	0	2	1	0	0	0	0	0	0	0	0	1	Body pain	1		0	0		0
NA_013_090_H	NA_013_090_H_A01	NA_013_090	2022-02-23 09:57:00	4	4	Nakaramwae	13	Lore Alochiyo	1	1	28	2	0	2	1	1	5		1	1	9		0	2	0	0	2	1	0	1	0	0	0	0	0	0	0		5	Resting shade	0.383165	0		0
NA_017_004_H	NA_017_004_H_A01	NA_017_004	2022-03-14 11:07:00	4	4	Lopuu	17	Lore Lokiteded	1	1	76	4	1	1	0	0	1		3	2	7		3	2	0	0	2	1	0	1	0	0	0	0	0	0	0		1		0.850449	0		0
NA_017_021_H	NA_017_021_H_A01	NA_017_021	2022-03-14 15:48:00	4	4	Lopuu	17	Lore Lokiteded	1	1	70	4	1	1	0	0	1		3	2	8		3	2	0	0	2	1	1	0	0	0	0	0	0	0	0		1		0	0		0
NA_017_036_H	NA_017_036_H_A02	NA_017_036	2022-03-14 10:26:00	4	4	Lopuu	17	Lore Lokiteded	1	1	25	2	0	2	0	0	6	Brother-In-law	1	1	3		1	2	0	0	5	0	1	0	0	0	0	0	0	0	0		1		0.294134	0		0
NA_017_036_H	NA_017_036_H_A01	NA_017_036	2022-03-14 09:57:00	4	4	Lopuu	17	Lore Lokiteded	1	1	22	1	0	1	0	0	3		1	1	3		1	2	0	0	2	1	1	0	0	0	0	0	0	0	0		1		0.294134	0		0
NA_017_039_H	NA_017_039_H_A01	NA_017_039	2022-03-14 10:35:00	4	4	Lopuu	17	Lore Lokiteded	1	1	27	2	0	1	2	2	1		2	1	8		3	2	0	0	2	1	0	1	0	0	1	0	0	0	0		1		0.448054	0		0
NA_017_040_H	NA_017_040_H_A02	NA_017_040	2022-03-14 12:25:00	4	4	Lopuu	17	Lore Lokiteded	1	1	24	1	0	1	0	0	3		2	1	8		3	2	0	0	2	1	0	1	0	0	0	0	0	0	0		1		0.268542	0		0
NA_017_052_H	NA_017_052_H_A02	NA_017_052	2022-03-11 15:20:00	4	4	Lopuu	17	Lore Apalomoe	1	1	48	3	0	2	0	0	2		2	1	3		1	2	0	0	2	1	1	0	0	0	0	0	0	0	0		1		0	0		0
NA_017_052_H	NA_017_052_H_A01	NA_017_052	2022-03-11 15:16:00	4	4	Lopuu	17	Lore Apalomoe	1	1	45	3	0	1	0	0	1		2	1	3		1	2	0	0	2	1	1	0	0	0	0	0	0	0	0		1		0	0		0
NA_017_066_H	NA_017_066_H_A01	NA_017_066	2022-03-11 11:26:00	4	4	Lopuu	17	Lore Alokol	1	1	23	1	0	2	0	0	3		4	2	3		1	2	0	0	2	1	1	0	0	0	0	0	0	0	0		3		0	0		0
NA_004_001_H	NA_004_001_H_A01	NA_004_001	2022-01-27 14:44:00	4	4	Naoyaminit	4	Lore Aporengereng	1	0	32	2	0	1	1	1	1		1	1	9		0	2	0	0	5	0	0	1	0	0	0	0	0	0	0		1		0.268542	0		0
NA_004_005_H	NA_004_005_H_A01	NA_004_005	2022-01-27 13:26:00	4	4	Naoyaminit	4	Lore Keebutur	1	0	46	3	0	2	1	1	1		2	1	9		0	2	0	0	1	1	0	1	0	0	0	0	0	1	0		1		0	0		0
NA_004_010_H	NA_004_010_H_A01	NA_004_010	2022-01-28 11:51:00	4	4	Naoyaminit	4	Lore Aporengereng	1	0	36	2	0	1	1	1	1		2	1	9		0	2	0	0	2	1	0	0	0	0	0	0	1	0	1	Typhoid	1		0	0		0
NA_004_023_H	NA_004_023_H_A01	NA_004_023	2022-01-27 15:27:00	4	4	Naoyaminit	4	Lore Aporengereng	1	0	30	2	0	1	0	0	1		2	1	9		0	2	0	0	5	0	0	1	0	0	0	0	0	0	0		1		0	0		0
NA_004_024_H	NA_004_024_H_A01	NA_004_024	2022-01-27 15:03:00	4	4	Naoyaminit	4	Lore Aporengereng	1	0	58	3	0	1	0	0	1		1	1	9		0	2	0	0	5	0	0	0	0	0	0	0	0	0	1	Body pain	1		0	0		0
NA_004_024_H	NA_004_024_H_A02	NA_004_024	2022-01-27 15:09:00	4	4	Naoyaminit	4	Lore Aporengereng	1	0	80	4	1	1	0	0	5		3	2	9		0	2	0	0	5	0	0	1	1	0	1	1	0	1	0		5	Grand mother's hut	0	0		0
NA_004_034_H	NA_004_034_H_A01	NA_004_034	2022-01-28 13:05:00	4	4	Naoyaminit	4	Lore Alouro		0	29	2	0	1	3	2	1		2	1	9		0	2	0	0	5	0	0	1	0	0	0	0	0	0	1	Body pain	1			0		0
NA_004_054_H	NA_004_054_H_A01	NA_004_054	2022-01-28 10:33:00	4	4	Naoyaminit	4	Lore Alouro	1	0	27	2	0	1	1	1	1		3	2	9		0	2	0	0	5	0	0	1	0	0	0	0	1	1	1	Typhoid	1		0	0		0
NA_004_055_H	NA_004_055_H_A01	NA_004_055	2022-01-27 14:02:00	4	4	Naoyaminit	4	Lore Keebutur	1	0	28	2	0	1	0	0	1		1	1	9		0	2	0	0	2	1	0	0	0	0	0	0	1	0	1	Body pain	1		0.268542	0		0
NA_004_055_H	NA_004_055_H_A02	NA_004_055	2022-01-27 14:09:00	4	4	Naoyaminit	4	Lore Keebutur	1	0	31	2	0	2	3	2	2		1	1	10	Community Animal Health Worker	4	2	0	0	5	0	1	0	0	0	0	0	0	0	0		1		0.268542	0		0
NA_004_080_H	NA_004_080_H_A01	NA_004_080	2022-01-27 10:00:00	4	4	Naoyaminit	4	Lore Apalowal	1	0	30	2	0	1	1	1	1		2	1	9		0	2	0	0	5	0	1	0	0	0	0	0	0	0	0		1		0.268542	0		0
NA_011_005_H	NA_011_005_H_A01	NA_011_005	2022-02-18 08:48:00	4	4	Adwaramukuny	11	Lore Angikatap	1	0	40	2	0	1	0	0	1		3	2	3		1	2	0	0	4	1	0	0	0	0	0	0	1	0	0		1		0	0		0
NA_011_013_H	NA_011_013_H_A01	NA_011_013	2022-02-18 10:24:00	4	4	Adwaramukuny	11	Lore Angikatap	1	0	36	2	0	1	0	0	1		3	2	7		3	2	0	0	5	0	0	1	0	0	0	0	0	0	0		1		0.268542	0		0
NA_013_052_H	NA_013_052_H_A01	NA_013_052	2022-02-23 11:37:00	4	4	Nakaramwae	13	Lore Alochiyo	1	0	32	2	0	1	0	0	1		2	1	3		1	2	0	0	2	1	1	0	0	0	0	0	0	0	0		1		0.641707	0		0
NA_017_001_H	NA_017_001_H_A01	NA_017_001	2022-03-11 09:05:00	4	4	Lopuu	17	Lore Apalomoe	1	0	66	4	1	2	1	1	1		1	1	7		3	2	1	1	2	1	0	0	1	0	0	0	0	0	0		1		0	0		0
NA_017_002_H	NA_017_002_H_A02	NA_017_002	2022-03-14 13:08:00	4	4	Lopuu	17	Lore Lokiteded	1	0	18	1	0	1	1	1	3		4	2	9		0	2	0	0	2	1	1	0	0	0	0	0	0	0	0		5	Uncle's hut	0.448054	0		0
NA_017_002_H	NA_017_002_H_A01	NA_017_002	2022-03-14 13:04:00	4	4	Lopuu	17	Lore Lokiteded	1	0	43	2	0	1	1	1	1		2	1	3		1	2	0	0	2	1	0	0	0	0	0	0	1	0	1	Gastric Ulcers	1		0.448054	0		0
NA_017_017_H	NA_017_017_H_A01	NA_017_017	2022-03-14 11:49:00	4	4	Lopuu	17	Lore Lokiteded	1	0	26	2	0	1	3	2	1		1	1	8		3	2	0	0	5	0	1	0	0	0	0	0	0	0	0		1		0.268542	0		0
NA_017_017_H	NA_017_017_H_A02	NA_017_017	2022-03-14 11:54:00	4	4	Lopuu	17	Lore Lokiteded	1	0	18	1	0	1	0	0	4		4	2	8		3	2	0	0	2	1	1	0	0	0	0	0	0	0	0		1		0.268542	0		0
NA_017_027_H	NA_017_027_H_A01	NA_017_027	2022-03-14 11:00:00	4	4	Lopuu	17	Lore Lokiteded	1	0	39	2	0	2	3	2	2		1	1	2		4	2	0	0	2	1	1	0	0	0	0	0	0	0	0		1		0.541595	0		0
NA_017_029_H	NA_017_029_H_A01	NA_017_029	2022-03-14 13:24:00	4	4	Lopuu	17	Lore Lokiteded	1	0	37	2	0	1	1	1	1		2	1	3		1	2	0	0	2	1	1	0	0	0	0	0	0	0	0		1		0.179511	0		0
NA_017_037_H	NA_017_037_H_A01	NA_017_037	2022-03-15 17:08:00	4	4	Lopuu	17	Lore Lokiteded	1	0	30	2	0	1	0	0	1		3	2	3		1	2	0	0	2	1	0	1	0	0	0	0	0	0	0		1		0	0		0
NA_017_044_H	NA_017_044_H_A01	NA_017_044	2022-03-11 14:03:00	4	4	Lopuu	17	Lore Lokiteded	1	0	23	1	0	1	0	0	1		2	1	3		1	2	0	0	2	1	1	0	0	0	0	0	0	0	0		1		0.448054	0		0
NA_017_060_H	NA_017_060_H_A01	NA_017_060	2022-03-11 15:02:00	4	4	Lopuu	17	Lore Apalomoe	1	0	33	2	0	1	0	0	1		1	1	3		1	2	0	0	2	1	1	0	0	0	0	0	0	0	0		1		0.114623	0		0
NA_004_070_H	NA_004_070_H_A02	NA_004_070	2022-01-27 09:52:00	4	4	Naoyaminit	4	Lore Apalowal	1	0	19	1	0	1	1	1	5		1	1	9		0	2	0	0	5	0	0	1	0	0	0	0	1	1	0		5	Rented house	0	0		0
NA_004_070_H	NA_004_070_H_A01	NA_004_070	2022-01-27 09:44:00	4	4	Naoyaminit	4	Lore Apalowal	1	0	48	3	0	1	0	0	1		3	2	9		0	2	0	0	4	1	0	1	0	0	0	0	1	0	0		1		0	0		0
NA_017_005_H	NA_017_005_H_A01	NA_017_005	2022-03-14 14:56:00	4	4	Lopuu	17	Lore Lokiteded	1	0	23	1	0	1	5	2	6	Sister	4	2	8		3	2	0	0	5	0	1	0	0	0	0	0	0	0	0		3	Teenage girls' hut	0.483278	0		0
NA_017_005_H	NA_017_005_H_A02	NA_017_005	2022-03-14 15:04:00	4	4	Lopuu	17	Lore Lokiteded	1	0	25	2	0	1	0	0	2		1	1	8		3	2	0	0	2	1	1	0	0	0	0	0	0	0	0		1		0.483278	0		0
NA_017_008_H	NA_017_008_H_A01	NA_017_008	2022-03-14 14:26:00	4	4	Lopuu	17	Lore Lokiteded	1	0	25	2	0	1	2	2	1		1	1	7		3	2	0	0	5	0	0	1	0	0	0	0	0	0	0		1		0.268542	0		0
NA_017_018_H	NA_017_018_H_A01	NA_017_018	2022-03-14 17:29:00	4	4	Lopuu	17	Lore Lokiteded	1	0	21	1	0	1	0	0	1		1	1	8		3	2	0	0	2	1	1	0	0	0	0	0	0	0	0		1		0.721107	0		0
NA_017_026_H	NA_017_026_H_A01	NA_017_026	2022-03-11 11:04:00	4	4	Lopuu	17	Lore Alokol	1	0	41	2	0	1	0	0	1		2	1	3		1	2	0	0	2	1	1	0	0	0	0	0	0	0	0		1		0.268542	0		0
NA_017_028_H	NA_017_028_H_A01	NA_017_028	2022-03-14 15:20:00	4	4	Lopuu	17	Lore Lokiteded	1	0	25	2	0	1	0	0	1		1	1	8		3	2	0	0	2	1	1	0	0	0	0	0	0	0	0		1		0.273053	0		0
NA_017_033_H	NA_017_033_H_A01	NA_017_033	2022-03-11 15:50:00	4	4	Lopuu	17	Lore Alokol	1	0	65	4	1	1	0	0	1		3	2	9		0	2	0	0	3	1	1	0	0	0	0	0	0	0	0		1		0.268542	0		0
NA_017_048_H	NA_017_048_H_A01	NA_017_048	2022-03-11 11:46:00	4	4	Lopuu	17	Lore Alokol	1	0	30	2	0	1	1	1	6	Sister	1	1	3		1	2	0	0	2	1	1	0	0	0	0	0	0	0	0		5	Sister's hut	0.656218	0		0
NA_017_055_H	NA_017_055_H_A01	NA_017_055	2022-03-11 10:38:00	4	4	Lopuu	17	Lore Apalomoe	1	0	36	2	0	1	0	0	2		1	1	3		1	2	0	0	5	0	1	0	0	0	0	0	0	0	0		1		0.268542	0		0
NA_017_057_H	NA_017_057_H_A01	NA_017_057	2022-03-11 16:49:00	4	4	Lopuu	17	Lore Apalomoe	1	0	45	3	0	1	0	0	1		2	1	9		0	2	1	1	3	1	0	0	0	0	0	0	0	0	1	The right leg and thigh swells and forms abscess	1		0	0		0
NA_017_058_H	NA_017_058_H_A01	NA_017_058	2022-03-11 12:50:00	4	4	Lopuu	17	Lore Apalomoe	1	0	48	3	0	1	0	0	1		3	2	3		1	2	0	0	5	0	1	0	0	0	0	0	0	0	0		1		0	0		0
NA_017_059_H	NA_017_059_H_A01	NA_017_059	2022-03-11 10:46:00	4	4	Lopuu	17	Lore Alokol	1	0	21	1	0	1	3	2	6	Sister	1	1	3		1	2	0	0	2	1	1	0	0	0	0	0	0	0	0		5	Sister's hut	0.268542	0		0
NA_017_059_H	NA_017_059_H_A02	NA_017_059	2022-03-11 10:50:00	4	4	Lopuu	17	Lore Alokol	1	0	29	2	0	1	0	0	1		1	1	3		1	2	0	0	2	1	1	0	0	0	0	0	0	0	0		1		0.268542	0		0
NA_017_061_H	NA_017_061_H_A01	NA_017_061	2022-03-11 13:04:00	4	4	Lopuu	17	Lore Apalomoe	1	0	53	3	0	1	0	0	1		3	2	3		1	2	0	0	2	1	1	0	0	0	0	0	0	0	0		1		0	0		0
NA_017_063_H	NA_017_063_H_A01	NA_017_063	2022-03-11 15:39:00	4	4	Lopuu	17	Lore Apalomoe	1	0	70	4	1	1	0	0	1		3	2	9		0	2	0	0	2	1	0	0	0	0	0	0	0	0	1	Joint pain	1		0	0		0
NA_017_065_H	NA_017_065_H_A01	NA_017_065	2022-03-11 12:22:00	4	4	Lopuu	17	Lore Alokol	1	0	94	4	1	1	0	0	1		3	2	3		1	2	1	1	2	1	1	0	0	0	0	0	0	0	0		1		0	0		0
NA_017_069_H	NA_017_069_H_A01	NA_017_069	2022-03-11 09:57:00	4	4	Lopuu	17	Lore Alokol	1	0	51	3	0	1	0	0	1		3	2	3		1	2	0	0	2	1	1	0	0	0	0	0	0	0	0		1		0	0		0
NA_008_005_H	NA_008_005_H_A01	NA_008_005	2022-02-07 10:43:00	4	5	Naronit	8	Lore Amaide	1	1	27	2	0	1	3	2	1		1	1	3		1	2	0	0	2	1	1	0	0	0	0	0	0	0	0		1		0.268542	0		0
NA_008_027_H	NA_008_027_H_A01	NA_008_027	2022-02-07 17:23:00	4	5	Naronit	8	Lore Abule	1	1	25	2	0	1	0	0	1		1	1	8		3	2	0	0	1	1	1	0	0	0	0	0	0	0	0		1		0.268542	0		0
NA_008_037_H	NA_008_037_H_A01	NA_008_037	2022-02-07 09:35:00	4	5	Naronit	8	Lore Amaide	1	1	37	2	0	1	0	0	1		1	1	3		1	2	0	0	2	1	0	0	0	0	0	0	0	0	1	Brucellosis	1		0.268542	0		0
NA_010_009_H	NA_010_009_H_A01	NA_010_009	2022-02-14 11:19:00	5	5	Loolim	10	Not Applicable	0	1	27	2	0	1	1	1	1		1	1	3		1	2	0	0	4	1	1	0	0	0	0	0	0	0	0		1		0	0		0
NA_010_040_H	NA_010_040_H_A01	NA_010_040	2022-02-14 11:35:00	4	5	Loolim	10	Not Applicable	0	1	23	1	0	2	3	2	1		4	2	3		1	2	0	0	5	0	1	0	0	0	0	0	0	0	0		1		0	0		0
NA_010_042_H	NA_010_042_H_A01	NA_010_042	2022-02-14 14:10:00	4	5	Loolim	10	Lore Alokoi	0	1	18	1	0	1	1	1	4		4	2	3		1	2	0	0	4	1	1	0	0	0	0	0	0	0	0		1		0	0		0
NA_010_056_H	NA_010_056_H_A02	NA_010_056	2022-02-15 11:05:00	4	5	Loolim	10	Not Applicable	0	1	45	3	0	2	0	0	2		1	1	3		1	2	0	0	2	1	1	0	0	0	0	0	0	0	0		1		0	0		0
NA_010_088_H	NA_010_088_H_A01	NA_010_088	2022-02-17 08:56:00	4	5	Loolim	10	Not Applicable	0	1	30	2	0	1	0	0	1		3	2	7		3	2	0	0	2	1	1	0	0	0	0	0	0	0	0		1		0	0		0
NA_010_096_H	NA_010_096_H_A01	NA_010_096		4	5	Loolim	10	Not Applicable	0	1	25	2	0	1	0	0	6	Sister-In-law	1	1	3		1	2	0	0	2	1	1	0	0	0	0	0	0	0	0		5	Aunt's hut	0	0		0
NA_010_114_H	NA_010_114_H_A02	NA_010_114	2022-02-17 10:51:00	4	5	Loolim	10	Not Applicable	0	1	18	1	0	1	2	2	3		4	2	9		0	2	0	0	5	0	1	0	0	0	0	0	0	0	0		5	Neighbor's hut	0	0		0
NA_014_023_H	NA_014_023_H_A01	NA_014_023	2022-02-28 11:43:00	4	5	Naoi	14	Lore Keekwaputh	1	1	22	1	0	2	0	0	2		2	1	3		1	2	0	0	1	1	1	0	0	0	0	0	0	0	0		1		0.268542	0		0
NA_014_023_H	NA_014_023_H_A02	NA_014_023	2022-02-28 11:47:00	4	5	Naoi	14	Lore Keekwaputh	1	1	24	1	0	1	0	0	1		2	1	3		1	2	0	0	2	1	1	0	0	0	0	0	0	0	0		1		0.268542	0		0
NA_014_048_H	NA_014_048_H_A01	NA_014_048	2022-02-28 13:07:00	4	5	Naoi	14	Lore Keekwaputh	1	1	55	3	0	2	0	0	1		1	1	3		1	2	0	0	2	1	1	0	0	0	0	0	0	0	0		1		0	0		0
NA_014_052_H	NA_014_052_H_A01	NA_014_052	2022-02-28 12:15:00	4	5	Naoi	14	Lore Keekwaputh	1	1	48	3	0	1	0	0	1		3	2	3		1	2	0	0	1	1	1	0	0	0	0	0	0	0	0		1		0	0		0
NA_014_075_H	NA_014_075_H_A01	NA_014_075	2022-03-01 10:08:00	4	5	Naoi	14	Lore Keekwaputh	1	1	27	2	0	1	4	2	1		2	1	3		1	2	0	0	5	0	1	0	0	0	0	0	0	0	0		1		0.556315	0		0
NA_014_085_H	NA_014_085_H_A01	NA_014_085	2022-03-01 15:19:00	4	5	Naoi	14	Lore Aichongat	1	1	32	2	0	1	0	0	1		3	2	3		1	2	0	0	2	1	0	1	0	0	0	0	0	0	0		1		0	0		0
NA_015_009_H	NA_015_009_H_A01	NA_015_009	2022-03-04 15:31:00	4	5	Naitakosowan	15	Lore Apakoelo	1	1	24	1	0	2	4	2	2		1	1	10	Farming and charcoal burning	4	2	0	0	1	1	1	0	0	0	0	0	0	0	0		1		0.383165	0		0
NA_015_016_H	NA_015_016_H_A01	NA_015_016	2022-03-04 14:51:00	4	5	Naitakosowan	15	Lore Apangaari	1	1	35	2	0	1	1	1	1		3	2	3		1	2	0	0	2	1	1	0	0	0	0	0	0	0	0		1		0	0		0
NA_015_026_H	NA_015_026_H_A01	NA_015_026	2022-03-04 10:42:00	4	5	Naitakosowan	15	Lore Kaakol	1	1	28	2	0	1	1	1	1		2	1	7		3	2	0	0	5	0	1	0	0	0	0	0	0	0	0		1		0.556315	0		0
NA_015_050_H	NA_015_050_H_A01	NA_015_050	2022-03-03 14:48:00	4	5	Naitakosowan	15	Lore Apaepela	1	1	24	1	0	1	1	1	1		2	1	3		1	2	0	0	5	0	0	1	0	0	0	0	0	0	1	Joint pain	1		0.268542	0		0
NA_015_057_H	NA_015_057_H_A01	NA_015_057	2022-03-03 13:59:00	4	5	Naitakosowan	15	Lore Apaepela	1	1	30	2	0	1	1	1	1		2	1	3		1	2	0	0	2	1	1	0	0	0	0	0	0	0	0		1		0	0		0
NA_015_072_H	NA_015_072_H_A01	NA_015_072	2022-03-03 14:19:00	4	5	Naitakosowan	15	Lore Apaepela	1	1	36	2	0	1	0	0	1		1	1	3		1	2	0	0	2	1	1	0	0	0	0	0	0	0	0		1		0	0		0
NA_015_078_H	NA_015_078_H_A01		2022-03-04 10:01:00	4	5	Naitakosowan	15	Lore Kaakol		1	52	3	0	2	3	2	1		2	1	3		1	2	0	0	5	0	0	0	0	0	0	0	0	0	1	Brucellosis	1			0		0
NA_008_013_H	NA_008_013_H_A01	NA_008_013	2022-02-08 11:40:00	4	5	Naronit	8	Lore Abule	1	0	39	2	0	1	0	0	1		2	1	3		1	2	0	0	4	1	1	0	0	0	0	0	0	0	0		1		0	0		0
NA_008_044_H	NA_008_044_H_A01	NA_008_044	2022-02-07 13:33:00	4	5	Naronit	8	Lore Ateko	1	0	37	2	0	1	1	1	1		1	1	3		1	2	0	0	2	1	1	0	0	0	0	0	0	0	0		1		0.114623	0		0
NA_008_049_H	NA_008_049_H_A01	NA_008_049	2022-02-07 14:42:00	4	5	Naronit	8	Lore Abule	1	0	28	2	0	1	0	0	1		3	2	3		1	2	0	0	1	1	1	0	0	0	0	0	0	0	0		1		0	0		0
NA_008_052_H	NA_008_052_H_A01	NA_008_052	2022-02-07 13:59:00	4	5	Naronit	8	Lore Ateko	1	0	25	2	0	1	1	1	6	Aunt	1	1	3		1	2	0	0	2	1	1	0	0	0	0	0	0	0	0		1		0	0		0
NA_008_061_H	NA_008_061_H_A01	NA_008_061	2022-02-07 15:07:00	4	5	Naronit	8	Lore Abule	1	0	43	2	0	1	0	0	1		3	2	3		1	2	0	0	1	1	1	0	0	0	0	0	0	0	0		1		0.268542	0		0
NA_010_006_H	NA_010_006_H_A01	NA_010_006	2022-02-15 13:38:00	4	5	Loolim	10	Not Applicable	0	0	24	1	0	1	1	1	1		2	1	8		3	2	0	0	2	1	1	0	0	0	0	0	0	0	0		1		0.268542	0		0
NA_010_006_H	NA_010_006_H_A02	NA_010_006	2022-02-15 13:41:00	4	5	Loolim	10	Not Applicable	0	0	50	3	0	1	1	1	3		3	2	9		0	2	0	0	2	1	1	0	0	0	0	0	0	0	0		5	Mother's hut	0.268542	0		0
NA_010_023_H	NA_010_023_H_A01	NA_010_023	2022-02-15 11:16:00	4	5	Loolim	10	Lore Apalomwae	0	0	44	2	0	1	0	0	1		3	2	3		1	2	0	0	5	0	1	0	0	0	0	0	0	0	0		1		0	0		0
NA_010_024_H	NA_010_024_H_A01	NA_010_024	2022-02-15 14:27:00	4	5	Loolim	10	Not Applicable	0	0	42	2	0	1	3	2	1		3	2	3		1	2	0	0	2	1	0	1	0	0	0	0	0	0	0		1		0	0		0
NA_010_024_H	NA_010_024_H_A02	NA_010_024	2022-02-15 14:31:00	4	5	Loolim	10	Not Applicable	0	0	24	1	0	1	3	2	3		2	1	7		3	2	0	0	2	1	1	0	0	0	0	0	0	0	0		3		0	0		0
NA_010_041_H	NA_010_041_H_A01	NA_010_041	2022-02-15 11:51:00	4	5	Loolim	10	Not Applicable	0	0	25	2	0	1	2	2	1		5	2	7		3	2	0	0	5	0	1	0	0	0	0	0	0	0	0		1		0	0		0
NA_010_043_H	NA_010_043_H_A01	NA_010_043	2022-02-15 12:29:00	4	5	Loolim	10	Not Applicable	0	0	27	2	0	1	2	2	1		2	1	3		1	2	0	0	2	1	1	0	0	0	0	0	0	0	0		1		0.268542	0		0
NA_010_045_H	NA_010_045_H_A01	NA_010_045	2022-02-14 15:03:00	4	5	Loolim	10	Not Applicable	0	0	35	2	0	1	3	2	1		1	1	3		1	2	0	0	4	1	1	0	0	0	0	0	0	0	0		1		0.721107	0		0
NA_010_046_H	NA_010_046_H_A01	NA_010_046	2022-02-14 13:08:00	4	5	Loolim	10	Lore Alokoi	1	0	49	3	0	1	1	1	1		1	1	3		1	2	0	0	4	1	1	0	0	0	0	0	0	0	0		1		0	0		0
NA_010_047_H	NA_010_047_H_A01	NA_010_047	2022-02-15 16:31:00	4	5	Loolim	10	Not Applicable	0	0	30	2	0	1	0	0	1		1	1	3		1	2	0	0	2	1	1	0	0	0	0	0	0	0	0		1		0.541595	0		0
NA_010_048_H	NA_010_048_H_A02	NA_010_048	2022-02-15 10:43:00	4	5	Loolim	10	Lore Apalomwae	1	0	60	3	0	1	0	0	4		3	2	9		0	2	0	0	2	1	1	0	0	0	0	0	0	0	0		1		0	0		0
NA_010_050_H	NA_010_050_H_A01	NA_010_050	2022-02-17 12:49:00	4	5	Loolim	10	Not Applicable	0	0	32	2	0	1	0	0	6	Care taker	2	1	7		3	2	0	0	4	1	1	0	0	0	0	0	0	0	0		1		0.670938	0		0
NA_010_051_H	NA_010_051_H_A01	NA_010_051	2022-02-14 16:10:00	4	5	Loolim	10	Not Applicable	0	0	18	1	0	1	1	1	1		1	1	3		1	2	0	0	2	1	1	0	0	0	0	0	0	0	0		1		0	0		0
NA_010_052_H	NA_010_052_H_A01	NA_010_052	2022-02-15 15:29:00	4	5	Loolim	10	Not Applicable	0	0	40	2	0	1	0	0	1		3	2	3		1	2	0	0	2	1	0	1	0	0	0	0	0	0	0		1		0	0		0
NA_010_052_H	NA_010_052_H_A02	NA_010_052	2022-02-15 15:32:00	4	5	Loolim	10	Not Applicable	0	0	19	1	0	2	0	0	6	Aunt	4	2	9		0	2	0	0	2	1	1	0	0	0	0	0	0	0	0		3		0	0		0
NA_010_055_H	NA_010_055_H_A01	NA_010_055	2022-02-15 10:13:00	4	5	Loolim	10	Lore Apalomwae	1	0	45	3	0	1	0	0	1		3	2	3		1	2	0	0	4	1	1	0	0	0	0	0	0	0	0		1		0.268542	0		0
NA_010_064_H	NA_010_064_H_A01	NA_010_064	2022-02-14 15:54:00	4	5	Loolim	10	Lore Apalomwae	1	0	48	3	0	1	4	2	1		2	1	1		4	2	0	0	2	1	1	0	0	0	0	0	0	0	0		1		1.0441	0		0
NA_010_065_H	NA_010_065_H_A01	NA_010_065	2022-02-14 16:58:00	4	5	Loolim	10	Not Applicable	0	0	48	3	0	1	1	1	1		2	1	7		3	2	0	0	5	0	1	0	0	0	0	0	0	0	0		1		0.368655	0		0
NA_010_065_H	NA_010_065_H_A01	NA_010_065	2022-02-14 17:02:00	4	5	Loolim	10	Not Applicable	0	0	26	2	0	2	2	2	3		4	2	7		3	2	0	0	5	0	0	0	0	0	0	0	0	0	1	Hepatitis B	1		0.368655	0		0
NA_010_069_H	NA_010_069_H_A01	NA_010_069	2022-02-17 09:48:00	4	5	Loolim	10	Not Applicable	0	0	63	4	1	1	0	0	1		3	2	9		0	2	0	0	2	1	1	0	0	0	0	0	0	0	0		1		0	0		0
NA_010_070_H	NA_010_070_H_A01	NA_010_070	2022-02-14 10:33:00	4	5	Loolim	10	Not Applicable	0	0	34	2	0	1	0	0	1		1	1	3		1	2	0	0	4	1	1	0	0	0	0	0	0	0	0		1		0	0		0
NA_010_073_H	NA_010_073_H_A01	NA_010_073	2022-02-15 15:09:00	4	5	Loolim	10	Not Applicable	0	0	43	2	0	1	2	2	1		1	1	4		2	2	0	0	2	1	1	0	0	0	0	0	0	0	0		1		0.114623	0		0
NA_010_076_H	NA_010_076_H_A01	NA_010_076	2022-02-14 11:02:00	4	5	Loolim	10	Not Applicable	0	0	55	3	0	2	0	0	1		2	1	7		3	2	0	0	1	1	1	0	0	0	0	0	0	0	0		1		1.00888	0		0
NA_010_078_H	NA_010_078_H_A01	NA_010_078	2022-02-14 12:55:00	4	5	Loolim	10	Lore Alokoi	0	0	21	1	0	2	1	1	1		2	1	3		1	2	0	0	4	1	1	0	0	0	0	0	0	0	0		1		0.268542	0		0
NA_010_080_H	NA_010_080_H_A01	NA_010_080	2022-02-14 10:05:00	4	5	Loolim	10	Not Applicable	0	0	44	2	0	1	1	1	1		2	1	3		1	2	0	0	4	1	1	0	0	0	0	0	0	0	0		1		0	0		0
NA_010_097_H	NA_010_097_H_A01	NA_010_097	2022-02-14 14:48:00	4	5	Loolim	10	Not Applicable	0	0	52	3	0	1	0	0	1		2	1	7		3	2	0	0	4	1	1	0	0	0	0	0	0	0	0		1		0.562677	0		0
NA_010_098_H	NA_010_098_H_A01	NA_010_098	2022-02-15 07:03:00	4	5	Loolim	10	Lore Alokoi	1	0	30	2	0	1	0	0	1		2	1	3		1	2	0	0	4	1	1	0	0	0	0	0	0	0	0		1		0.383165	0		0
NA_010_101_H	NA_010_101_H_A03	NA_010_101	2022-02-15 07:23:00	4	5	Loolim	10	Lore Alokoi	1	0	19	1	0	1	2	2	6	Uncle	4	2	9		0	2	0	0	5	0	1	0	0	0	0	0	0	0	0		5	Aunt's hut	0	0		0
NA_010_101_H	NA_010_101_H_A02	NA_010_101	2022-02-15 07:19:00	4	5	Loolim	10	Lore Alokoi	1	0	24	1	0	1	1	1	4		2	1	3		1	2	0	0	4	1	1	0	0	0	0	0	0	0	0		1		0	0		0
NA_010_110_H	NA_010_110_H_A01	NA_010_110	2022-02-17 11:33:00	4	5	Loolim	10	Lore Apalomwae	1	0	30	2	0	1	3	2	1		2	1	7		3	2	0	0	5	0	1	0	0	0	0	0	0	0	0		1		0.273053	0		0
NA_010_111_H	NA_010_111_H_A01	NA_010_111	2022-02-14 16:41:00	4	5	Loolim	10	Lore Apalomwae	1	0	23	1	0	1	2	2	1		1	1	3		1	2	0	0	4	1	1	0	0	0	0	0	0	0	0		1		0	0		0
NA_010_117_H	NA_010_117_H_A01	NA_010_117	2022-02-14 15:27:00	4	5	Loolim	10	Lore Apalomwae	1	0	46	3	0	1	0	0	1		2	1	3		1	2	0	0	2	1	1	0	0	0	0	0	0	0	0		1		0	0		0
NA_010_117_H	NA_010_117_H_A02	NA_010_117	2022-02-14 15:32:00	4	5	Loolim	10	Lore Apalomwae	1	0	18	1	0	2	1	1	3		4	2	3		1	2	0	0	2	1	1	0	0	0	0	0	0	0	0		3		0	0		0
NA_014_010_H	NA_014_010_H_A01	NA_014_010	2022-02-28 11:02:00	4	5	Naoi	14	Lore Keekwaputh	1	0	65	4	1	2	1	1	1		1	1	4		2	2	0	0	1	1	1	0	0	0	0	0	0	0	0		1		0.268542	0		0
NA_014_010_H	NA_014_010_H_A02	NA_014_010	2022-02-28 11:36:00	4	5	Naoi	14	Lore Keekwaputh	1	0	46	3	0	1	0	0	2		1	1	3		1	2	0	0	5	0	1	0	0	0	0	0	0	0	0		1		0.268542	0		0
NA_014_015_H	NA_014_011_H_A01	NA_014_015	2022-02-28 15:26:00	4	5	Naoi	14	Lore Keekwaputh	1	0	27	2	0	1	0	0	1		1	1	8		3	2	0	0	2	1	1	0	0	0	0	0	0	0	0		1		0.556315	0		0
NA_014_019_H	NA_014_019_H_A01	NA_014_019	2022-02-28 16:39:00	4	5	Naoi	14	Lore Keekwaputh	1	0	29	2	0	1	0	0	1		1	1	3		1	2	0	0	2	1	1	0	0	0	0	0	0	0	0		1		0.268542	0		0
NA_014_029_H	NA_014_029_H_A01	NA_014_029	2022-03-01 10:28:00	4	5	Naoi	14	Lore Aichongat	1	0	25	2	0	1	1	1	1		2	1	8		3	2	0	0	2	1	1	0	0	0	0	0	0	0	0		1		0.448054	0		0
NA_014_031_H	NA_014_031_H_A01	NA_014_031	2022-03-01 11:06:00	4	5	Naoi	14	Lore Keekwaputh	1	0	30	2	0	1	0	0	4		2	1	9		0	2	0	0	2	1	1	0	0	0	0	0	0	0	0		1		0.268542	0		0
NA_014_032_H	NA_014_032_H_A01	NA_014_032	2022-02-28 12:35:00	4	5	Naoi	14	Lore Keekwaputh	1	0	26	2	0	2	1	1	3		4	2	3		1	2	0	0	1	1	1	0	0	0	0	0	0	0	0		3		0.268542	0		0
NA_014_032_H	NA_014_032_H_A02	NA_014_032	2022-02-28 12:43:00	4	5	Naoi	14	Lore Keekwaputh	1	0	40	2	0	1	0	0	1		2	1	3		1	2	0	0	1	1	0	1	0	0	0	0	0	0	0		1		0.268542	0		0
NA_014_033_H	NA_014_033_H_A01	NA_014_033	2022-03-01 12:24:00	4	5	Naoi	14	Lore Keekwaputh	1	0	30	2	0	1	3	2	1		1	1	3		1	2	0	0	5	0	1	0	0	0	0	0	0	0	0		1		0.268542	0		0
NA_014_035_H	NA_014_035_H_A01	NA_014_035	2022-03-01 10:50:00	4	5	Naoi	14	Lore Aichongat	1	0	23	1	0	1	1	1	2		1	1	3		1	2	0	0	2	1	0	1	0	0	0	0	0	0	1		1		0.383165	0		0
NA_014_035_H	NA_014_035_H_A02	NA_014_035	2022-03-01 10:56:00	4	5	Naoi	14	Lore Aichongat	1	0	25	2	0	2	0	0	1		1	1	3		1	2	0	0	2	1	1	0	0	0	0	0	0	0	0		1		0.383165	0		0
NA_014_049_H	NA_014_049_H_A02	NA_014_049	2022-03-01 14:12:00	4	5	Naoi	14	Lore Aichongat	1	0	74	4	1	1	0	0	1		2	1	9		0	2	0	0	1	1	0	0	0	0	1	0	0	0	0		1		0.273053	0		0
NA_014_062_H	NA_014_062_H_A01	NA_014_062	2022-03-01 11:41:00	4	5	Naoi	14	Lore Keekwaputh	1	0	42	2	0	1	1	1	1		3	2	3		1	2	0	0	2	1	0	1	0	0	0	0	0	0	0		1		0	0		0	0	0	1	1	0
NA_014_064_H	NA_014_064_H_A02	NA_014_064	2022-03-01 16:09:00	4	5	Naoi	14	Lore Aichongat	1	0	48	3	0	2	0	0	2		1	1	4		2	2	0	0	1	1	1	0	0	0	0	0	0	0	0		1		0	0		0
NA_014_064_H	NA_014_064_H_A01	NA_014_064	2022-03-01 15:37:00	4	5	Naoi	14	Lore Aichongat	1	0	40	2	0	1	0	0	1		1	1	10	Casual labour and peasant farming	4	2	0	0	2	1	0	1	0	0	0	0	0	0	0		1		0	0		0
NA_014_081_H	NA_014_081_H_A01	NA_014_081	2022-02-28 10:32:00	4	5	Naoi	14	Lore Keekwaputh	1	0	26	2	0	1	1	1	1		4	2	8		3	2	0	0	2	1	1	0	0	0	0	0	0	0	0		1		0.452564	0		0
NA_014_081_H	NA_014_081_H_A02	NA_014_081	2022-02-28 10:37:00	4	5	Naoi	14	Lore Keekwaputh	1	0	75	4	1	1	1	1	5	Mother-In-law	3	2	9		0	2	0	0	5	0	0	0	0	0	1	0	0	0	0		5	Grand mother's hut	0.452564	0		0
NA_014_084_H	NA_014_084_H_A01	NA_014_084	2022-03-01 09:29:00	4	5	Naoi	14	Lore Keekwaputh	1	0	33	2	0	1	1	1	1		2	1	3		1	2	0	0	2	1	1	0	0	0	0	0	0	0	0		1		0	0		0
NA_014_087_H	NA_014_087_H_A01	NA_014_087	2022-03-01 14:34:00	4	5	Naoi	14	Lore Aichongat	1	0	65	4	1	1	0	0	1		3	2	3		1	2	1	1	2	1	0	0	0	0	1	0	0	0	0		1		0	0		0
NA_015_001_H	NA_015_001_H_A01	NA_015_001	2022-03-03 11:53:00	4	5	Naitakosowan	15	Lore Apangaari	1	0	35	2	0	2	3	2	1		1	1	4		2	2	1	1	2	1	0	0	0	0	0	0	1	1	0		1		0	0		0
NA_015_011_H	NA_015_011_H_A01	NA_015_011	2022-03-04 14:10:00	4	5	Naitakosowan	15	Lore Apangaari	1	0	21	1	0	1	1	1	2		2	1	3		1	2	0	0	1	1	1	0	0	0	0	0	0	0	0		1		0.268542	0		0
NA_015_014_H	NA_015_014_H_A01	NA_015_014	2022-03-03 10:32:00	4	5	Naitakosowan	15	Lore Apangaari	1	0	46	3	0	1	0	0	1		2	1	3		1	2	0	0	2	1	0	1	0	0	0	0	0	0	0		1		0.268542	0		0
NA_015_014_H	NA_015_014_H_A02	NA_015_014	2022-03-03 10:43:00	4	5	Naitakosowan	15	Lore Apangaari	1	0	19	1	0	2	1	1	3		4	2	9		0	2	0	0	2	1	1	0	0	0	0	0	0	0	0		3		0.268542	0		0
NA_015_025_H	NA_015_025_H_A01	NA_015_025	2022-03-03 15:42:00	4	5	Naitakosowan	15	Lore Apakoelo	1	0	49	3	0	1	1	1	1		3	2	7		3	2	1	1	4	1	0	1	0	0	0	0	0	0	0		1		0	0		0
NA_015_028_H	NA_015_028_H_A02	NA_015_028	2022-03-03 11:22:00	4	5	Naitakosowan	15	Lore Apangaari	1	0	50	3	0	1	1	1	1		1	1	9		0	2	0	0	2	1	1	0	0	0	0	0	0	0	0		1		0	0		0
NA_015_028_H	NA_015_028_H_A01	NA_015_028	2022-03-03 11:16:00	4	5	Naitakosowan	15	Lore Apangaari	1	0	20	1	0	2	3	2	3		4	2	10	Student	4	2	0	0	2	1	1	0	0	0	0	0	0	0	0		5	Neighbor's hut	0	0		0
NA_015_030_H	NA_015_030_H_A01	NA_015_030	2022-03-03 11:38:00	4	5	Naitakosowan	15	Lore Apangaari	1	0	28	2	0	1	1	1	2		2	1	3		1	2	0	0	3	1	0	0	0	0	0	0	0	0	1	Body pain	1		0.268542	0		0
NA_015_040_H	NA_015_040_H_A02	NA_015_040	2022-03-04 13:08:00	4	5	Naitakosowan	15	Lore Apaepela	1	0	35	2	0	2	1	1	6	Cousin sister	4	2	3		1	2	0	0	2	1	1	0	0	0	0	0	0	0	0		3		0.268542	0		0
NA_015_040_H	NA_015_040_H_A01	NA_015_040	2022-03-04 13:02:00	4	5	Naitakosowan	15	Lore Apaepela	1	0	19	1	0	1	1	1	4		4	2	3		1	2	0	0	2	1	1	0	0	0	0	0	0	0	0		3		0.268542	0		0
NA_015_047_H	NA_015_047_H_A01	NA_015_047	2022-03-04 11:48:00	4	5	Naitakosowan	15	Lore Apaepela	1	0	50	3	0	1	0	0	1		3	2	10	Begging	4	2	1	1	2	1	1	0	0	0	0	0	0	0	0		1		0	0		0
NA_015_048_H	NA_015_048_H_A01	NA_015_048	2022-03-04 10:29:00	4	5	Naitakosowan	15	Lore Kaakol	1	0	32	2	0	1	1	1	1		2	1	3		1	2	0	0	2	1	1	0	0	0	0	0	0	0	0		1		0	0		0
NA_015_049_H	NA_015_049_H_A01	NA_015_049	2022-03-03 16:30:00	4	5	Naitakosowan	15	Lore Apakoelo	1	0	37	2	0	1	0	0	1		3	2	3		1	2	0	0	2	1	0	0	0	0	0	0	0	0	1	Brucellosis	1		0	0		0
NA_015_051_H	NA_015_051_H_A01	NA_015_051	2022-03-03 12:21:00	4	5	Naitakosowan	15	Lore Apangaari	1	0	33	2	0	1	0	0	3		2	1	3		1	2	0	0	2	1	1	0	0	0	0	0	0	0	0		1		0	0		0
NA_015_052_H	NA_015_052_H_A01	NA_015_052	2022-03-04 12:51:00	4	5	Naitakosowan	15	Lore Apakoelo	1	0	30	2	0	1	1	1	1		1	1	4		2	2	0	0	2	1	1	0	0	0	0	0	0	0	0		1		0	0		0
NA_015_053_H	NA_015_053_H_A01	NA_015_053	2022-03-03 12:45:00	4	5	Naitakosowan	15	Lore Apangaari	1	0	25	2	0	1	1	1	1		1	1	3		1	2	0	0	3	1	1	0	0	0	0	0	0	0	0		1		0.268542	0		0
NA_015_053_H	NA_015_053_H_A02	NA_015_053	2022-03-03 13:04:00	4	5	Naitakosowan	15	Lore Apangaari	1	0	35	2	0	1	3	2	4		5	2	7		3	2	0	0	2	1	1	0	0	0	0	0	0	0	0		1		0.268542	0		0
NA_015_056_H	NA_015_056_H_A01	NA_015_056	2022-03-04 09:45:00	4	5	Naitakosowan	15	Lore Apakoelo	1	0	38	2	0	1	0	0	1		2	1	7		3	2	0	0	2	1	0	1	0	0	0	0	0	0	1	Body pain	1		0	0		0
NA_015_061_H	NA_015_061_H_A01	NA_015_061	2022-03-04 09:21:00	4	5	Naitakosowan	15	Lore Kaakol	1	0	54	3	0	1	0	0	1		2	1	7		3	2	0	0	3	1	0	0	0	0	0	0	0	0	1	Body pain	1		0	0		0
NA_015_063_H	NA_015_063_H_A01	NA_015_063	2022-03-03 13:11:00	4	5	Naitakosowan	15	Lore Apangaari	1	0	37	2	0	1	0	0	1		2	1	3		1	2	0	0	2	1	1	0	0	0	0	0	0	0	1		1		0	0		0
NA_015_065_H	NA_015_065_H_A01	NA_015_065	2022-03-04 12:38:00	4	5	Naitakosowan	15	Lore Apakoelo	1	0	46	3	0	1	1	1	1		5	2	3		1	2	0	0	2	1	0	0	0	0	0	0	0	0	1	Body pain	1		0	0		0
NA_015_067_H	NA_015_067_H_A01	NA_015_067	2022-03-04 12:29:00	4	5	Naitakosowan	15	Lore Apakoelo	1	0	48	3	0	1	1	1	1		2	1	3		1	2	0	0	2	1	0	1	0	0	0	0	0	0	0		1		0.268542	0		0
NA_015_070_H	NA_015_070_H_A01	NA_015_070	2022-03-04 13:30:00	4	5	Naitakosowan	15	Lore Apaepela	1	0	27	2	0	1	1	1	1		2	1	3		1	2	0	0	4	1	1	0	0	0	0	0	0	0	0		1		0	0		0
NA_015_079_H	NA_015_079_H_A01	NA_015_079	2022-03-06 21:08:00	4	5	Naitakosowan	15	Lore Apaepela	1	0	27	2	0	1	1	1	1		5	2	3		1	2	0	0	2	1	1	0	0	0	0	0	0	0	0		1		0.268542	0		0
NA_018_001_H	NA_018_001_H_A01	NA_018_001	2022-03-15 16:30:00	4	5	Kaingolejek	18	Lore Apomomwo	1	0	44	2	0	1	0	0	2		2	1	3		1	2	0	0	2	1	0	1	0	0	0	0	0	0	1	Body pain	1		0	0		0
NA_018_011_H	NA_018_011_H_A01	NA_018_011	2022-03-15 14:45:00	4	5	Kaingolejek	18	Lore Apomomwo	1	0	37	2	0	1	0	0	1		2	1	3		1	2	0	0	2	1	1	0	0	0	0	0	0	0	0		1		0	0		0
NA_018_013_H	NA_018_013_H_A01	NA_018_013	2022-03-15 12:18:00	4	5	Kaingolejek	18	Lore Apameri	1	0	30	2	0	1	0	0	1		2	1	3		1	2	0	0	2	1	0	0	0	0	0	0	1	0	0		1		0.114623	0		0
NA_018_017_H	NA_018_017_H_A01	NA_018_017	2022-03-15 16:05:00	4	5	Kaingolejek	18	Lore Apomomwo	1	0	33	2	0	1	0	0	1		2	1	3		1	2	0	0	2	1	1	0	0	0	0	0	0	0	0		1		0.448054	0		0
NA_018_023_H	NA_018_023_H_A01	NA_018_023	2022-03-15 11:38:00	4	5	Kaingolejek	18	Lore Apooreng	1	0	30	2	0	1	1	1	1		1	1	3		1	2	0	0	2	1	1	0	0	0	0	0	0	0	0		1		0	0		0
NA_018_025_H	NA_018_025_H_A01	NA_018_025	2022-03-15 09:53:00	4	5	Kaingolejek	18	Lore Apooreng	1	0	48	3	0	1	0	0	1		3	2	3		1	2	0	0	2	1	1	0	0	0	0	0	0	0	0		1		0.656218	0		0
NA_018_028_H	NA_018_028_H_A01	NA_018_028	2022-03-15 10:29:00	4	5	Kaingolejek	18	Lore Apooreng	1	0	70	4	1	2	0	0	1		2	1	3		1	2	0	0	2	1	0	1	0	0	0	0	0	0	1	TB	1		0	0		0
NA_018_031_H	NA_018_031_H_A01	NA_018_031	2022-03-15 09:30:00	4	5	Kaingolejek	18	Lore Apooreng	1	0	30	2	0	2	0	0	2		2	1	5		2	2	0	0	1	1	1	0	0	0	0	0	0	0	0		1		1.1235	0		0
NA_018_034_H	NA_018_034_H_A01	NA_018_034	2022-03-15 10:45:00	4	5	Kaingolejek	18	Lore Apooreng	1	0	40	2	0	1	0	0	1		2	1	3		1	2	0	0	2	1	0	0	0	0	0	0	0	0	1	Body pain	1		0.179511	0		0
NA_018_038_H	NA_018_038_H_A01	NA_018_038	2022-03-15 14:20:00	4	5	Kaingolejek	18	Lore Apomomwo	1	0	36	2	0	1	1	1	1		2	1	3		1	2	0	0	4	1	0	1	0	0	0	0	0	0	0		1		0	0		0
NA_018_041_H	NA_018_041_H_A02	NA_018_041	2022-03-15 11:35:00	4	5	Kaingolejek	18	Lore Apooreng	1	0	30	2	0	2	0	0	2		1	1	3		1	2	0	0	1	1	0	0	0	0	1	0	0	0	1	Wound	1		0	0		0
NA_018_042_H	NA_018_042_H_A01	NA_018_042	2022-03-15 15:05:00	5	5	Kaingolejek	18	Lore Apomomwo	1	0	30	2	0	1	0	0	1		1	1	3		1	2	0	0	2	1	1	0	0	0	0	0	0	0	0		1		0	0		0
NA_018_047_H	NA_018_047_H_A01	NA_018_047	2022-03-15 11:56:00	4	5	Kaingolejek	18	Lore Apameri	1	0	23	1	0	1	0	0	1		2	1	3		1	2	0	0	2	1	0	0	0	0	0	0	0	0	1	Body pain	1		0.268542	0		0
NA_018_056_H	NA_018_056_H_A02	NA_018_056	2022-03-15 13:01:00	4	5	Kaingolejek	18	Lore Apameri	1	0	52	3	0	1	0	0	1		2	1	3		1	2	0	0	2	1	0	0	0	0	1	0	1	0	0		1		0.448054	0		0
NA_018_056_H	NA_018_056_H_A01	NA_018_056	2022-03-15 12:58:00	4	5	Kaingolejek	18	Lore Apameri	1	0	18	1	0	1	0	0	3		4	2	3		1	2	0	0	4	1	1	0	0	0	0	0	0	0	0		5	Aunt's hut	0.448054	0		0
NA_019_022_H	NA_019_022_H_A01	NA_019_022	2022-03-17 13:28:00	4	5	Angaro	19	Lore Amoding	1	0	25	2	0	1	1	1	1		1	1	3		1	2	0	0	5	0	0	1	0	0	0	0	0	0	0		1		0.268542	0		0
NA_019_026_H	NA_019_026_H_A01	NA_019_026	2022-03-17 10:40:00	4	5	Angaro	19	Lore Amoding	1	0	32	2	0	1	0	0	1		2	1	3		1	2	0	0	2	1	1	0	0	0	0	0	0	0	0		1		0.850449	0		0
NA_019_028_H	NA_019_028_H_A01	NA_019_028	2022-03-17 11:31:00	4	5	Angaro	19	Lore Amoding	1	0	28	2	0	1	1	1	3		2	1	3		1	2	0	0	2	1	0	0	0	0	0	0	0	0	1	General body weakness	1		0	0		0
NA_019_030_H	NA_019_030_H_A01	NA_019_030	2022-03-17 11:53:00	4	5	Angaro	19	Lore Amoding	1	0	22	1	0	1	0	0	6	Aunt	1	1	3		1	2	0	0	2	1	1	0	0	0	0	0	0	0	0		1		0	0		0
NA_019_032_H	NA_019_032_H_A02	NA_019_032	2022-03-17 10:36:00	4	5	Angaro	19	Lore Amoding	1	0	27	2	0	2	0	0	2		1	1	3		1	2	0	0	1	1	1	0	0	0	0	0	0	0	0		1		0	0		0
NA_019_032_H	NA_019_032_H_A01	NA_019_032	2022-03-17 10:19:00	4	5	Angaro	19	Lore Amoding	1	0	24	1	0	1	0	0	1		1	1	3		1	2	0	0	2	1	1	0	0	0	0	0	0	0	0		1		0	0		0
NA_008_056_H	NA_008_056_H_A01	NA_008_056	2022-02-07 15:32:00	4	5	Naronit	8	Lore Abule	1	0	29	2	0	1	5	2	1		1	1	1		4	2	0	0	5	0	0	0	0	0	1	0	0	0	0		1		0.735827	0		0
NA_008_057_H	NA_008_057_H_A01	NA_008_057	2022-02-08 11:03:00	4	5	Naronit	8	Lore Ateko	1	0	40	2	0	1	0	0	1		1	1	3		1	2	0	0	2	1	1	0	0	0	0	0	0	0	0		1		0	0		0
NA_010_017_H	NA_010_017_H_A01	NA_010_017	2022-02-17 09:23:00	4	5	Loolim	10	Not Applicable	0	0	51	3	0	1	0	0	1		3	2	3		1	2	0	0	2	1	1	0	0	0	0	0	0	0	0		1		0	0		0
NA_010_017_H	NA_010_017_H_A02	NA_010_017	2022-02-17 09:26:00	4	5	Loolim	10	Not Applicable	0	0	25	2	0	1	0	0	3		1	1	3		1	2	0	0	4	1	1	0	0	0	0	0	0	0	0		3		0	0		0
NA_010_035_H	NA_010_035_H_A01	NA_010_035	2022-02-17 11:52:00	4	5	Loolim	10	Not Applicable	0	0	36	2	0	1	0	0	1		2	1	7		3	2	0	0	2	1	1	0	0	0	0	0	0	0	0		1		0.268542	0		0
NA_010_049_H	NA_010_049_H_A01	NA_010_049	2022-02-14 12:44:00	4	5	Loolim	10	Lore Alokoi	1	0	61	4	1	1	0	0	1		2	1	4		2	2	0	0	4	1	1	0	0	0	0	0	0	0	0		1		0	0		0
NA_010_049_H	NA_010_049_H_A02	NA_010_049	2022-02-14 12:59:00	4	5	Loolim	10	Lore Alokoi	1	0	61	4	1	2	0	0	2		2	1	3		1	2	0	0	4	1	1	0	0	0	0	0	0	0	0		1		0	0		0
NA_010_100_H	NA_010_100_H_A01		2022-02-15 12:12:00	4	5	Loolim	10	Lore Apalomwae		0	32	2	0	1	3	2	1		3	2	3		1	2	0	0	4	1	1	0	0	0	0	0	0	0	0		1			0		0
NA_015_010_H	NA_015_010_H_A01	NA_015_010	2022-03-03 16:48:00	4	5	Naitakosowan	15	Lore Apakoelo	1	0	39	2	0	1	0	0	1		2	1	8		3	2	0	0	2	1	0	0	0	0	0	0	1	0	1	Brucellosis	1		0.273053	0		0
NA_015_059_H	NA_015_059_H_A01	NA_015_059	2022-03-03 13:22:00	4	5	Naitakosowan	15	Lore Apangaari	1	0	43	2	0	1	0	0	1		2	1	3		1	2	0	0	2	1	1	0	0	0	0	0	0	0	0		1		0	0		0
NA_021_004_H	NA_021_004_H_A01	NA_021_004	2022-03-28 11:59:00	5	6	Kanaura	21	Not Applicable	0	0	53	3	0	1	0	0	1		3	2	3		1	2	0	0	2	1	0	0	0	0	0	0	1	0	0		1		0	0		0
NA_021_006_H	NA_021_006_H_A01	NA_021_006	2022-03-28 09:43:00	5	6	Kanaura	21	Not Applicable	0	0	22	1	0	1	0	0	1		1	1	7		3	2	0	0	5	0	1	0	0	0	0	0	0	0	0		1		0	0		0
NA_021_008_H	NA_021_008_H_A01	NA_021_008	2022-03-28 10:26:00	5	6	Kanaura	21	Not Applicable	0	0	47	3	0	1	0	0	2		1	1	3		1	2	0	0	1	1	0	1	0	0	0	0	0	0	0		1		0.829368	0		0
NA_021_010_H	NA_021_010_H_A01	NA_021_010	2022-03-25 11:27:00	5	6	Kanaura	21	Not Applicable	0	0	32	2	0	1	0	0	1		2	1	7		3	2	0	0	2	1	1	0	0	0	0	0	0	0	0		1		0	0		0
NA_021_012_H	NA_021_012_H_A01	NA_021_012	2022-03-24 13:09:00	5	6	Kanaura	21	Not Applicable	0	0	24	1	0	1	2	2	1		2	1	8		3	2	0	0	1	1	1	0	0	0	0	0	0	0	0		1		0.114623	0		0
NA_021_015_H	NA_021_015_H_A01	NA_021_015	2022-03-25 11:45:00	5	6	Kanaura	21	Not Applicable	0	0	30	2	0	1	0	0	1		1	1	3		1	2	0	0	1	1	0	1	0	0	0	0	0	0	0		1		0.656218	0		0
NA_021_017_H	NA_021_017_H_A01	NA_021_017	2022-03-25 10:07:00	5	6	Kanaura	21	Not Applicable	0	0	28	2	0	1	0	0	2		2	1	3		1	2	0	0	2	1	0	1	0	0	0	0	0	0	0		1		0.541595	0		0
NA_021_018_H	NA_021_018_H_A01	NA_021_018	2022-03-25 16:43:00	5	6	Kanaura	21	Not Applicable	0	0	48	3	0	1	2	2	1		1	1	10	Brewing and small scale crop farming	4	2	0	0	1	1	1	0	0	0	0	0	0	0	0		1		0.835729	0		0
NA_021_021_H	NA_021_021_H_A01	NA_021_021	2022-03-24 09:45:00	5	6	Kanaura	21	Not Applicable	0	0	56	3	0	2	1	1	2		1	1	9		0	2	1	1	2	1	1	0	0	0	0	0	0	0	0		1		0.114623	0		0
NA_021_021_H	NA_021_021_H_A02	NA_021_021	2022-03-24 09:52:00	5	6	Kanaura	21	Not Applicable	0	0	34	2	0	1	0	0	1		1	1	7		3	2	0	0	5	0	1	0	0	0	0	0	0	0	0		1		0.114623	0		0
NA_021_022_H	NA_021_022_H_A01	NA_021_022	2022-03-28 10:48:00	5	6	Kanaura	21	Not Applicable	0	0	23	1	0	1	0	0	1		1	1	3		1	2	0	0	2	1	1	0	0	0	0	0	0	0	0		1		0	0		0
NA_021_029_H	NA_021_029_H_A01	NA_021_029	2022-03-24 15:13:00	5	6	Kanaura	21	Not Applicable	0	0	30	2	0	1	1	1	1		1	1	3		1	2	0	0	2	1	1	0	0	0	0	0	0	0	0		1		0	0		0
NA_021_030_H	NA_021_030_H_A02	NA_021_030	2022-03-24 10:38:00	5	6	Kanaura	21	Not Applicable	0	0	33	2	0	2	0	0	2		1	1	3		1	2	0	0	1	1	0	1	0	0	0	0	0	0	0		1		0.268542	0		0
NA_021_030_H	NA_021_030_H_A01	NA_021_030	2022-03-24 10:24:00	5	6	Kanaura	21	Not Applicable	0	0	30	2	0	1	0	0	1		2	1	8		3	2	0	0	2	1	1	0	0	0	0	0	0	0	0		1		0.268542	0		0
NA_021_031_H	NA_021_031_H_A01	NA_021_031	2022-03-24 17:05:00	5	6	Kanaura	21	Not Applicable	0	0	50	3	0	1	0	0	1		1	1	9		0	2	0	0	2	1	0	1	0	0	0	0	1	0	0		1		0.273053	0		0
NA_021_032_H	NA_021_032_H_A01	NA_021_032	2022-03-28 13:29:00	5	6	Kanaura	21	Not Applicable	0	0	28	2	0	1	1	1	1		1	1	8		3	2	0	0	2	1	1	0	0	0	0	0	0	0	0		1		0.268542	0		0
NA_021_035_H	NA_021_035_H_A01	NA_021_035	2022-03-28 12:28:00	5	6	Kanaura	21	Not Applicable	0	0	34	2	0	1	0	0	1		2	1	3		1	2	0	0	2	1	0	0	0	0	0	0	0	1	0		1		0.179511	0		0
NA_021_036_H	NA_021_036_H_A01	NA_021_036	2022-03-24 11:39:00	5	6	Kanaura	21	Not Applicable	0	0	31	2	0	1	0	0	1		2	1	7		3	2	0	0	2	1	0	0	0	0	0	0	0	0	1	Surgical wound	1		0.100112	0		0
NA_021_040_H	NA_021_040_H_A01	NA_021_040		5	6	Kanaura	21	Not Applicable	0	0	38	2	0	1	1	1	1		2	1	3		1	2	0	0	2	1	1	0	0	0	0	0	0	0	0		1		0	0		0
NA_021_049_H	NA_021_049_H_A01	NA_021_049	2022-03-28 11:40:00	5	6	Kanaura	21	Not Applicable	0	0	60	3	0	1	0	0	1		3	2	6		4	2	0	0	1	1	0	0	0	0	1	0	0	0	0		1		0	0		0
NA_021_052_H	NA_021_052_H_A01	NA_021_052	2022-03-24 15:43:00	5	6	Kanaura	21	Not Applicable	0	0	33	2	0	1	0	0	1		2	1	3		1	2	0	0	1	1	1	0	0	0	0	0	0	0	0		1		0.114623	0		0
NA_021_053_H	NA_021_053_H_A01	NA_021_053	2022-03-28 13:09:00	5	6	Kanaura	21	Not Applicable	0	0	26	2	0	1	2	2	1		1	1	8		3	2	0	0	1	1	1	0	0	0	0	0	0	0	0		1		0.268542	0		0
NA_021_056_H	NA_021_056_H_A01	NA_021_056	2022-03-25 15:49:00	5	6	Kanaura	21	Not Applicable	0	0	35	2	0	1	0	0	1		2	1	3		1	2	0	0	2	1	1	0	0	0	0	0	0	0	0		1		0	0		0
NA_021_058_H	NA_021_058_H_A01	NA_021_058	2022-03-24 13:42:00	5	6	Kanaura	21	Not Applicable	0	0	22	1	0	1	1	1	1		1	1	9		0	2	0	0	2	1	1	0	0	0	0	0	0	0	0		1		0	0		0
NA_021_061_H	NA_021_061_H_A01	NA_021_061	2022-03-24 10:03:00	5	6	Kanaura	21	Not Applicable	0	0	23	1	0	1	1	1	1		1	1	7		3	2	0	0	5	0	1	0	0	0	0	0	0	0	0		1		0.541595	0		0
NA_021_063_H	NA_021_063_H_A01	NA_021_063	2022-03-25 15:02:00	5	6	Kanaura	21	Not Applicable	0	0	27	2	0	1	1	1	1		1	1	3		1	2	0	0	2	1	1	0	0	0	0	0	0	0	0		1		0.387676	0		0
NA_021_065_H	NA_021_065_H_A01	NA_021_065	2022-03-25 12:44:00	5	6	Kanaura	21	Not Applicable	0	0	33	2	0	1	0	0	1		1	1	3		1	2	0	0	1	1	1	0	0	0	0	0	0	0	0		1		0.541595	0		0
NA_021_068_H	NA_021_068_H_A01	NA_021_068	2022-03-25 16:22:00	5	6	Kanaura	21	Not Applicable	0	0	30	2	0	1	0	0	1		2	1	3		1	2	0	0	2	1	0	1	0	0	0	0	0	0	0		1		0	0		0
NA_021_069_H	NA_021_069_H_A01	NA_021_069	2022-03-24 12:43:00	5	6	Kanaura	21	Not Applicable	0	0	31	2	0	1	1	1	1		2	1	3		1	2	0	0	2	1	1	0	0	0	0	0	0	0	0		1		0	0		0
NA_021_072_H	NA_021_072_H_A01	NA_021_072	2022-03-25 13:38:00	5	6	Kanaura	21	Not Applicable	0	0	24	1	0	1	1	1	1		1	1	7		3	2	0	0	5	0	1	0	0	0	0	0	0	0	0		1		0.268542	0		0
NA_021_073_H	NA_021_073_H_A01	NA_021_073	2022-03-25 15:29:00	5	6	Kanaura	21	Not Applicable	0	0	45	3	0	1	0	0	1		1	1	3		1	2	0	0	1	1	1	0	0	0	0	0	0	0	0		1		0	0		0
NA_021_075_H	NA_021_075_H_A01	NA_021_075	2022-03-25 14:07:00	5	6	Kanaura	21	Not Applicable	0	0	40	2	0	1	0	0	1		2	1	3		1	2	0	0	2	1	0	1	0	0	1	0	0	0	0	Body pain	1		0	0		0
NA_021_079_H	NA_021_079_H_A01	NA_021_079	2022-03-24 15:01:00	5	6	Kanaura	21	Not Applicable	0	0	25	2	0	1	0	0	1		2	1	3		1	2	0	0	2	1	0	1	0	0	0	0	0	0	0		1		0.387676	0		0
NA_021_084_H	NA_021_084_H_A01	NA_021_084	2022-03-24 12:25:00	5	6	Kanaura	21	Not Applicable	0	0	32	2	0	1	0	0	1		2	1	7		3	2	0	0	5	0	1	0	0	0	0	0	0	0	0		1		0.268542	0		0
NA_021_088_H	NA_021_088_H_A01	NA_021_088	2022-03-25 10:39:00	5	6	Kanaura	21	Not Applicable	0	0	30	2	0	2	3	2	1		1	1	3		1	2	0	0	5	0	0	0	0	0	0	0	0	0	1	Allergy	1		0.556315	0		0
NA_021_088_H	NA_021_088_H_A02	NA_021_088	2022-03-25 10:44:00	5	6	Kanaura	21	Not Applicable	0	0	20	1	0	1	3	2	2		1	1	7		3	2	0	0	5	0	1	0	0	0	0	0	0	0	0		1		0.556315	0		0
NA_021_090_H	NA_021_090_H_A01	NA_021_090	2022-03-24 16:46:00	5	6	Kanaura	21	Not Applicable	0	0	28	2	0	1	1	1	1		1	1	3		1	2	0	0	2	1	1	0	0	0	0	0	0	0	0		1		0	0		0
NA_021_091_H	NA_021_091_H_A01	NA_021_091	2022-03-28 14:04:00	5	6	Kanaura	21	Not Applicable	0	0	34	2	0	1	0	0	1		2	1	3		1	2	0	0	5	0	1	0	0	0	0	0	0	0	0		1		0	0		0
NA_021_096_H	NA_021_096_H_A01	NA_021_096	2022-03-25 10:56:00	5	6	Kanaura	21	Not Applicable	0	0	25	2	0	2	4	2	2		1	1	7		3	4	0	0	1	1	0	0	0	0	0	0	0	0	1	Allergy	1		0.721107	0		0
NA_021_099_H	NA_021_099_H_A01	NA_021_099	2022-03-24 13:28:00	5	6	Kanaura	21	Not Applicable	0	0	33	2	0	1	0	0	1		2	1	7		3	2	0	0	1	1	1	0	0	0	0	0	0	0	0		1		0.670938	0		0
NA_021_100_H	NA_021_100_H_A01	NA_021_100	2022-03-24 11:19:00	5	6	Kanaura	21	Not Applicable	0	0	29	2	0	1	2	2	1		2	1	3		1	2	0	0	4	1	0	1	0	0	0	0	0	0	0		1		0	0		0
NA_021_102_H	NA_021_102_H_A01	NA_021_102	2022-03-28 11:26:00	5	6	Kanaura	21	Not Applicable	0	0	35	2	0	1	0	0	1		1	1	3		1	2	0	0	2	1	1	0	0	0	0	0	0	0	0		1		0.567187	0		0
NA_021_103_H	NA_021_103_H_A01	NA_021_103	2022-03-25 12:16:00	5	6	Kanaura	21	Not Applicable	0	0	30	2	0	1	0	0	1		2	1	3		1	2	0	0	2	1	0	1	0	0	0	0	0	0	0		1		0.268542	0		0
NA_021_103_H	NA_021_103_H_A02	NA_021_103	2022-03-25 12:33:00	5	6	Kanaura	21	Not Applicable	0	0	22	1	0	1	0	0	2		2	1	3		1	2	0	0	2	1	1	0	0	0	0	0	0	0	0		1		0.268542	0		0
NA_021_105_H	NA_021_105_H_A01	NA_021_105	2022-03-25 09:50:00	5	6	Kanaura	21	Not Applicable	0	0	27	2	0	1	1	1	1		2	1	8		3	2	0	0	2	1	0	1	0	0	0	0	0	0	0		1		0.268542	0		0
NA_021_106_H	NA_021_106_H_A01	NA_021_106	2022-03-28 09:30:00	5	6	Kanaura	21	Not Applicable	0	0	30	2	0	1	0	0	1		5	2	3		1	2	0	0	1	1	1	0	0	0	0	0	0	0	0		1		0	0		0
NA_022_001_H	NA_022_001_H_A01	NA_022_001	2022-03-22 11:58:00	5	6	Atedeoi	22	Not Applicable	0	0	21	1	0	2	1	1	1		1	1	3		1	2	0	0	2	1	0	1	0	0	0	0	0	0	1	Broken rib	1		0.383165	0		0
NA_022_002_H	NA_022_002_H_A01	NA_022_002	2022-03-21 10:35:00	5	6	Atedeoi	22	Not Applicable	0	0	33	2	0	1	0	0	1		2	1	3		1	2	0	0	2	1	1	0	0	0	0	0	0	0	0		1		0.383165	0		0
NA_022_004_H	NA_022_004_H_A01	NA_022_004	2022-03-22 10:19:00	5	6	Atedeoi	22	Not Applicable	0	0	30	2	0	1	5	2	1		1	1	2		4	2	0	0	5	0	1	0	0	0	0	0	0	0	0		1		0.541595	0		0
NA_022_004_H	NA_022_004_H_A02	NA_022_004	2022-03-22 10:26:00	5	6	Atedeoi	22	Not Applicable	0	0	66	4	1	1	0	0	5		2	1	4		2	2	0	0	4	1	0	1	0	0	0	0	0	0	0		3		0.541595	0		0
NA_022_005_H	NA_022_005_H_A01	NA_022_005	2022-03-21 11:12:00	5	6	Atedeoi	22	Not Applicable	0	0	60	3	0	1	1	1	1		1	1	9		0	2	0	0	2	1	0	1	0	0	0	0	0	0	0		1		0.835729	0		0
NA_022_005_H	NA_022_005_H_A02	NA_022_005	2022-03-21 11:23:00	5	6	Atedeoi	22	Not Applicable	0	0	18	1	0	1	1	1	6	Daughter-In-law	1	1	9		0	2	0	0	2	1	1	0	0	0	0	0	0	0	0		1		0.835729	0		0
NA_022_006_H	NA_022_006_H_A01	NA_022_006	2022-03-21 10:57:00	5	6	Atedeoi	22	Not Applicable	0	0	55	3	0	1	0	0	1		3	2	4		2	2	0	0	2	1	0	1	0	0	0	0	0	0	0		1		0.387676	0		0
NA_022_007_H	NA_022_007_H_A01	NA_022_007	2022-03-21 14:07:00	5	6	Atedeoi	22	Not Applicable	0	0	63	4	1	1	0	0	1		3	2	9		0	2	1	1	2	1	0	0	0	0	1	0	0	0	0		1		0.383165	0		0
NA_022_009_H	NA_022_009_H_A01	NA_022_009	2022-03-21 13:37:00	5	6	Atedeoi	22	Not Applicable	0	0	60	3	0	2	0	0	1		2	1	3		1	2	0	0	2	1	0	0	0	0	0	0	0	0	1	Body pain	1		0.268542	0		0
NA_022_010_H	NA_022_010_H_A01	NA_022_010	2022-03-21 14:15:00	5	6	Atedeoi	22	Not Applicable	0	0	47	3	0	1	0	0	1		1	1	3		1	2	0	0	2	1	1	0	0	0	0	0	0	0	0		1		0	0		0
NA_022_012_H	NA_022_012_H_A01	NA_022_012	2022-03-21 16:23:00	5	6	Atedeoi	22	Not Applicable	0	0	50	3	0	1	0	0	1		2	1	4		2	2	0	0	2	1	0	0	0	0	0	0	0	0	1	Joint pain	1		0	0		0
NA_022_014_H	NA_022_014_H_A01	NA_022_014	2022-03-22 13:28:00	5	6	Atedeoi	22	Not Applicable	0	0	30	2	0	1	0	0	1		2	1	10	Cultivation and charcoal burning	4	2	0	0	5	0	0	0	1	0	0	0	0	0	1	Body pain	1		0.114623	0		0
NA_022_014_H	NA_022_014_H_A02	NA_022_014	2022-03-22 13:35:00	5	6	Atedeoi	22	Not Applicable	0	0	19	1	0	1	1	1	3		1	1	9		0	2	0	0	5	0	1	0	0	0	0	0	0	0	0		3		0.114623	0		0
NA_022_016_H	NA_022_016_H_A02	NA_022_016	2022-03-22 12:48:00	5	6	Atedeoi	22	Not Applicable	0	0	20	1	0	1	0	0	1		2	1	3		1	2	0	0	4	1	1	0	0	0	0	0	0	0	0		3		0.656218	0		0
NA_022_016_H	NA_022_016_H_A01	NA_022_016	2022-03-22 12:40:00	5	6	Atedeoi	22	Not Applicable	0	0	65	4	1	1	0	0	1		1	1	4		2	2	0	0	2	1	1	0	0	0	0	0	0	0	0		1		0.656218	0		0
NA_022_017_H	NA_022_017_H_A01	NA_022_017	2022-03-22 11:32:00	5	6	Atedeoi	22	Not Applicable	0	0	27	2	0	1	3	2	1		1	1	8		3	2	0	0	5	0	0	0	0	0	0	0	1	0	0		1		0.656218	0		0
NA_022_018_H	NA_022_018_H_A01	NA_022_018	2022-03-21 15:38:00	5	6	Atedeoi	22	Not Applicable	0	0	30	2	0	1	0	0	1		2	1	3		1	2	0	0	2	1	0	0	0	0	0	0	0	0	1	Body pain	1		0.114623	0		0
NA_022_019_H	NA_022_019_H_A01	NA_022_019	2022-03-22 11:16:00	5	6	Atedeoi	22	Not Applicable	0	0	58	3	0	1	0	0	1		2	1	3		1	2	0	0	2	1	0	0	0	0	0	0	0	0	1	Hepatitis B	1		0.387676	0		0
NA_022_022_H	NA_022_022_H_A02	NA_022_022	2022-03-21 14:55:00	5	6	Atedeoi	22	Not Applicable	0	0	32	2	0	1	0	0	1		2	1	3		1	2	0	0	1	1	1	0	0	0	0	0	0	0	0		1		0.835729	0		0
NA_022_023_H	NA_022_023_H_A01	NA_022_023	2022-03-22 12:09:00	5	6	Atedeoi	22	Not Applicable	0	0	37	2	0	1	0	0	1		1	1	3		1	2	0	0	1	1	0	1	0	0	0	0	0	0	0		1		0.735827	0		0
NA_022_023_H	NA_022_023_H_A02	NA_022_023	2022-03-22 12:13:00	5	6	Atedeoi	22	Not Applicable	0	0	20	1	0	1	1	1	3		1	1	3		1	2	0	0	2	1	1	0	0	0	0	0	0	0	0		1		0.735827	0		0
NA_022_025_H	NA_022_025_H_A01	NA_022_025	2022-03-22 15:22:00	5	6	Atedeoi	22	Not Applicable	0	0	35	2	0	1	0	0	1		2	1	3		1	2	0	0	2	1	1	0	0	0	0	0	0	0	0		1		0.383165	0		0
NA_022_026_H	NA_022_026_H_A01	NA_022_026	2022-03-22 14:48:00	5	6	Atedeoi	22	Not Applicable	0	0	20	1	0	1	0	0	3		1	1	3		1	2	0	0	4	1	0	1	0	0	0	0	0	0	0		1		0	0		0
NA_022_027_H	NA_022_027_H_A01	NA_022_027	2022-03-22 09:54:00	5	6	Atedeoi	22	Not Applicable	0	0	19	1	0	1	0	0	3		4	2	3		1	2	0	0	2	1	0	0	0	0	0	0	1	0	0		1		0	0		0
NA_022_028_H	NA_022_028_H_A02	NA_022_028	2022-03-21 16:01:00	5	6	Atedeoi	22	Not Applicable	0	0	24	1	0	1	1	1	6	Daughter-In-law	1	1	3		1	2	0	0	2	1	0	1	0	0	0	0	0	0	0		3		0.268542	0		0
NA_022_028_H	NA_022_028_H_A01	NA_022_028	2022-03-21 15:57:00	5	6	Atedeoi	22	Not Applicable	0	0	76	4	1	1	0	0	1		3	2	3		1	2	1	1	2	1	1	0	0	0	0	0	0	0	0		1		0.268542	0		0
NA_022_029_H	NA_022_029_H_A01	NA_022_029	2022-03-22 14:12:00	5	6	Atedeoi	22	Not Applicable	0	0	33	2	0	1	0	0	1		2	1	3		1	2	0	0	5	0	0	0	0	0	0	0	0	0	1	Surgical wound	1		0.273053	0		0
NA_022_030_H	NA_022_030_H_A01	NA_022_030	2022-03-21 15:27:00	5	6	Atedeoi	22	Not Applicable	0	0	28	2	0	1	1	1	1		1	1	3		1	2	0	0	2	1	1	0	0	0	0	0	0	0	0		1		0.114623	0		0
NA_022_032_H	NA_022_032_H_A01	NA_022_032	2022-03-22 14:00:00	5	6	Atedeoi	22	Not Applicable	0	0	61	4	1	1	0	0	1		3	2	3		1	2	1	1	2	1	0	1	0	0	0	0	0	0	0		1		0	0		0
NA_022_033_H	NA_022_033_H_A01	NA_022_033	2022-03-22 12:28:00	5	6	Atedeoi	22	Not Applicable	0	0	23	1	0	1	0	0	3		1	1	3		1	2	0	0	2	1	1	0	0	0	0	0	0	0	0		3		0.114623	0		0
NA_022_033_H	NA_022_033_H_A02	NA_022_033	2022-03-22 12:32:00	5	6	Atedeoi	22	Not Applicable	0	0	50	3	0	1	0	0	1		3	2	3		1	2	0	0	2	1	0	1	0	0	0	0	0	0	0		1		0.114623	0		0
NA_022_034_H	NA_022_034_H_A01	NA_022_034	2022-03-22 15:03:00	5	6	Atedeoi	22	Not Applicable	0	0	43	2	0	1	0	0	1		1	1	3		1	2	0	0	2	1	0	1	0	0	0	0	1	0	0		1		0	0		0
NA_022_037_H	NA_022_037_H_A01	NA_022_037	2022-03-22 10:58:00	5	6	Atedeoi	22	Not Applicable	0	0	24	1	0	1	0	0	1		2	1	3		1	2	0	0	2	1	1	0	0	0	0	0	0	0	0		1		0.114623	0		0
NA_022_038_H	NA_022_038_H_A01	NA_022_038	2022-03-21 12:17:00	5	6	Atedeoi	22	Not Applicable	0	0	42	2	0	1	0	0	1		2	1	3		1	2	0	0	2	1	0	0	1	0	0	0	0	0	0		1		0	0		0
NA_022_039_H	NA_022_039_H_A01	NA_022_039	2022-03-21 10:19:00	5	6	Atedeoi	22	Not Applicable	0	0	62	4	1	1	0	0	1		2	1	4		2	1	0	0	2	1	0	0	0	0	1	0	1	0	0		1		0.383165	0		0
NA_022_042_H	NA_022_042_H_A01	NA_022_042	2022-03-21 11:57:00	5	6	Atedeoi	22	Not Applicable	0	0	41	2	0	2	0	0	2		1	1	3		1	2	0	0	2	1	0	1	0	0	0	0	0	0	0		1		0	0		0
NA_022_042_H	NA_022_042_H_A02	NA_022_042	2022-03-21 12:00:00	5	6	Atedeoi	22	Not Applicable	0	0	39	2	0	1	0	0	1		1	1	3		1	2	0	0	2	1	1	0	0	0	0	0	0	0	0		1		0	0		0
NA_022_044_H	NA_022_044_H_A01	NA_022_044	2022-03-22 15:26:00	5	6	Atedeoi	22	Not Applicable	0	0	30	2	0	1	0	0	4		2	1	3		1	2	0	0	2	1	1	0	0	0	0	0	0	0	0		1		0	0		0
NA_022_046_H	NA_022_046_H_A02	NA_022_046	2022-03-21 14:31:00	5	6	Atedeoi	22	Not Applicable	0	0	59	3	0	2	0	0	2		2	1	4		2	2	0	0	2	1	0	1	0	0	0	0	0	0	0		1		0.656218	0		0
NA_022_046_H	NA_022_046_H_A03	NA_022_046	2022-03-21 14:35:00	5	6	Atedeoi	22	Not Applicable	0	0	60	3	0	1	0	0	1		2	1	4		2	2	0	0	2	1	0	1	0	0	0	0	0	0	0		1		0.656218	0		0
NA_022_046_H	NA_022_046_H_A04	NA_022_046	2022-03-21 14:37:00	5	6	Atedeoi	22	Not Applicable	0	0	20	1	0	1	1	1	3		1	1	9		0	2	0	0	2	1	0	1	0	0	0	0	0	0	1	Heart problems	3		0.656218	0		0
NA_022_046_H	NA_022_046_H_A01	NA_022_046	2022-03-21 14:28:00	5	6	Atedeoi	22	Not Applicable	0	0	25	2	0	2	2	2	3		1	1	4		2	2	0	0	2	1	1	0	0	0	0	0	0	0	0		3		0.656218	0		0
NA_022_047_H	NA_022_047_H_A01	NA_022_047	2022-03-21 12:51:00	5	6	Atedeoi	22	Not Applicable	0	0	63	4	1	1	0	0	1		3	2	9		0	2	0	0	2	1	1	0	0	0	0	0	0	0	0		1		0	0		0
NA_022_048_H	NA_022_048_H_A02	NA_022_048	2022-03-21 13:13:00	5	6	Atedeoi	22	Not Applicable	0	0	43	2	0	1	0	0	1		3	2	3		1	2	0	0	2	1	1	0	0	0	0	0	0	0	0		1		0	0		0
NA_022_048_H	NA_022_048_H_A01	NA_022_048	2022-03-21 13:07:00	5	6	Atedeoi	22	Not Applicable	0	0	65	4	1	1	0	0	5		2	1	9		0	2	0	0	2	1	0	1	1	0	0	0	0	0	0		1		0	0		0
NA_024_001_H	NA_024_001_H_A02	NA_024_001	2022-03-29 12:56:00	5	6	Natirae A	24	Not Applicable	0	0	36	2	0	1	1	1	1		2	1	4		2	2	0	0	2	1	1	0	0	0	0	0	0	0	0		1		1.00888	0		0
NA_024_001_H	NA_024_001_H_A01	NA_024_001	2022-03-29 12:48:00	5	6	Natirae A	24	Not Applicable	0	0	40	2	0	1	0	0	6	Sister-In-law	5	2	9		0	2	0	0	2	1	1	0	0	0	0	0	0	0	0		1		1.00888	0		0
NA_024_004_H	NA_024_004_H_A01	NA_024_004	2022-03-29 09:52:00	5	6	Natirae A	24	Not Applicable	0	0	25	2	0	1	0	0	1		1	1	3		1	2	0	0	2	1	1	0	0	0	0	0	0	0	0		1		0.541595	0		0
NA_024_005_H	NA_024_005_H_A02	NA_024_005	2022-03-31 09:57:00	5	6	Natirae A	24	Not Applicable	0	0	50	3	0	2	0	0	2		2	1	4		2	2	0	0	2	1	1	0	0	0	0	0	0	0	0		1		0.387676	0		0
NA_024_005_H	NA_024_005_H_A01	NA_024_005	2022-03-31 09:50:00	5	6	Natirae A	24	Not Applicable	0	0	51	3	0	1	0	0	1		2	1	10	Traditional healer	4	2	0	0	4	1	1	0	0	0	0	0	0	0	0		1		0.387676	0		0
NA_024_005_H	NA_024_005_H_A03	NA_024_005	2022-03-31 10:06:00	4	6	Natirae A	24	Not Applicable	0	0	20	1	0	2	0	0	3		4	2	5		2	2	0	0	2	1	1	0	0	0	0	0	0	0	0		3		0.387676	0		0
NA_024_007_H	NA_024_007_H_A01	NA_024_007	2022-03-29 15:09:00	5	6	Natirae A	24	Not Applicable	0	0	37	2	0	1	0	0	1		5	2	10	Casual labour and small scale crop farming	4	2	0	0	5	0	0	0	1	0	0	0	0	0	0		1		0.268542	0		0
NA_024_008_H	NA_024_008_H_A01	NA_024_008	2022-03-29 11:29:00	5	6	Natirae A	24	Not Applicable	0	0	30	2	0	1	1	1	1		2	1	3		1	2	0	0	5	0	1	0	0	0	0	0	0	0	0		1		0.268542	0		0
NA_024_009_H	NA_024_009_H_A01	NA_024_009	2022-03-31 09:28:00	5	6	Natirae A	24	Not Applicable	0	0	55	3	0	1	0	0	1		2	1	9		0	2	0	0	5	0	1	0	0	0	0	0	0	0	0		1		0.75633	0		0
NA_024_010_H	NA_024_010_H_A01	NA_024_010	2022-03-29 10:51:00	5	6	Natirae A	24	Not Applicable	0	0	51	3	0	1	0	0	1		1	1	3		1	2	0	0	2	1	0	0	0	0	0	0	0	0	1	Joint pain	1		0	0		0
NA_024_012_H	NA_024_012_H_A01	NA_024_012	2022-03-29 14:44:00	5	6	Natirae A	24	Not Applicable	0	0	32	2	0	1	0	0	1		2	1	4		2	2	0	0	2	1	1	0	0	0	0	0	0	0	0		1		0.656218	0		0
NA_024_014_H	NA_024_014_H_A02	NA_024_014	2022-03-31 13:35:00	5	6	Natirae A	24	Not Applicable	0	0	48	3	0	2	0	0	2		1	1	3		1	2	0	0	1	1	0	1	0	0	0	0	0	0	0		1		0	0		0
NA_024_014_H	NA_024_014_H_A01	NA_024_014	2022-03-31 13:32:00	5	6	Natirae A	24	Not Applicable	0	0	45	3	0	1	0	0	1		1	1	4		2	2	0	0	1	1	0	1	0	0	0	0	0	0	0		1		0	0		0
NA_024_016_H	NA_024_016_H_A01	NA_024_016	2022-03-29 10:38:00	5	6	Natirae A	24	Not Applicable	0	0	30	2	0	1	1	1	1		1	1	7		3	2	0	0	2	1	1	0	0	0	0	0	0	0	0		1		0.268542	0		0
NA_024_017_H	NA_024_017_H_A02	NA_024_017	2022-03-29 14:02:00	5	6	Natirae A	24	Not Applicable	0	0	26	2	0	1	1	1	3		2	1	3		1	2	0	0	5	0	1	0	0	0	0	0	0	0	0		1		0.541595	0		0
NA_024_017_H	NA_024_017_H_A01	NA_024_017	2022-03-29 13:59:00	5	6	Natirae A	24	Not Applicable	0	0	76	4	1	1	0	0	1		2	1	9		0	2	0	0	4	1	0	1	0	0	0	0	0	0	0		1		0.541595	0		0
NA_024_018_H	NA_024_018_H_A01	NA_024_018	2022-03-29 10:05:00	5	6	Natirae A	24	Not Applicable	0	0	24	1	0	1	0	0	3		2	1	9		0	2	0	0	2	1	1	0	0	0	0	0	0	0	0		1		0.452564	0		0
NA_024_020_H	NA_024_020_H_A02	NA_024_020	2022-03-31 13:08:00	5	6	Natirae A	24	Not Applicable	0	0	37	2	0	1	0	0	1		2	1	7		3	2	0	0	2	1	1	0	0	0	0	0	0	0	0		1		0.273053	0		0
NA_024_020_H	NA_024_020_H_A01	NA_024_020	2022-03-31 13:03:00	5	6	Natirae A	24	Not Applicable	0	0	37	2	0	2	0	0	2		2	1	3		1	2	0	0	1	1	1	0	0	0	0	0	0	0	0		1		0.273053	0		0
NA_024_021_H	NA_024_021_H_A02	NA_024_021	2022-03-31 10:26:00	5	6	Natirae A	24	Not Applicable	0	0	22	1	0	1	0	0	3		1	1	4		2	2	0	0	1	1	1	0	0	0	0	0	0	0	0		3		0.656218	0		0
NA_024_021_H	NA_024_021_H_A01	NA_024_021	2022-03-31 10:14:00	5	6	Naronit	24	Not Applicable	0	0	48	3	0	2	1	1	1		2	1	3		1	2	2	1	1	1	0	1	0	0	0	0	0	0	0		1		0.656218	0		0
NA_024_023_H	NA_024_023_H_A02	NA_024_023	2022-03-29 12:03:00	5	6	Natirae A	24	Not Applicable	0	0	19	1	0	1	1	1	3		1	1	8		3	2	0	0	5	0	0	0	0	0	0	0	0	0	1	Gastric Ulcers	1		0.268542	0		0
NA_024_023_H	NA_024_023_H_A01	NA_024_023	2022-03-29 11:54:00	5	6	Natirae A	24	Not Applicable	0	0	43	2	0	1	0	0	1		2	1	3		1	5	0	0	2	1	1	0	0	0	0	0	0	0	0		1		0.268542	0		0
NA_024_024_H	NA_024_024_H_A01	NA_024_024	2022-03-31 10:57:00	5	6	Natirae A	24	Not Applicable	0	0	23	1	0	1	1	1	1		1	1	4		2	2	0	0	5	0	1	0	0	0	0	0	0	0	0		1		0.835729	0		0
NA_024_025_H	NA_024_025_H_A01	NA_024_025	2022-03-29 15:49:00	5	6	Natirae A	24	Not Applicable	0	0	20	1	0	1	1	1	3		1	1	9		0	2	0	0	2	1	0	1	0	0	0	0	0	0	0		1		0.383165	0		0
NA_024_026_H	NA_024_026_H_A01	NA_024_026	2022-03-29 11:04:00	5	6	Natirae A	24	Not Applicable	0	0	45	3	0	1	0	0	1		1	1	7		3	2	0	0	2	1	1	0	0	0	0	0	0	0	0		1		0.387676	0		0
NA_024_027_H	NA_024_027_H_A01	NA_024_027	2022-03-29 12:30:00	5	6	Natirae A	24	Not Applicable	0	0	25	2	0	2	2	2	1		1	1	3		1	2	0	0	1	1	1	0	0	0	0	0	0	0	0		1		0.721107	0		0
NA_024_027_H	NA_024_027_H_A02	NA_024_027	2022-03-29 12:34:00	5	6	Natirae A	24	Not Applicable	0	0	20	1	0	2	1	1	2		1	1	3		1	2	0	0	2	1	1	0	0	0	0	0	0	0	0		1		0.721107	0		0
NA_024_029_H	NA_024_029_H_A01	NA_024_029	2022-03-31 14:44:00	5	6	Natirae A	24	Not Applicable	0	0	37	2	0	1	0	0	1		2	1	8		3	2	0	0	1	1	1	0	0	0	0	0	0	0	0		1		0.114623	0		0
NA_024_030_H	NA_024_030_H_A01	NA_024_030	2022-03-29 13:44:00	5	6	Natirae A	24	Not Applicable	0	0	43	2	0	1	0	0	2		1	1	4		2	2	0	0	1	1	0	1	0	0	0	0	0	0	0		1		0.273053	0		0
NA_024_030_H	NA_024_030_H_A02	NA_024_030	2022-03-29 13:49:00	5	6	Natirae A	24	Not Applicable	0	0	20	1	0	1	1	1	3		2	1	3		1	2	0	0	5	0	0	0	0	0	1	0	0	0	1	Body pain	3		0.273053	0		0
NA_024_031_H	NA_024_031_H_A01	NA_024_031	2022-03-31 12:11:00	5	6	Natirae A	24	Not Applicable	0	0	25	2	0	1	1	1	1		1	1	3		1	2	0	0	5	0	0	1	0	0	0	0	0	0	0		1		0.721107	0		0
NA_024_033_H	NA_024_033_H_A01	NA_024_033	2022-03-31 11:19:00	5	6	Natirae A	24	Not Applicable	0	0	35	2	0	1	0	0	1		2	1	3		1	2	0	0	2	1	0	0	1	0	0	0	0	0	0		1		0.383165	0		0
NA_024_034_H	NA_024_034_H_A01	NA_024_034	2022-03-29 16:18:00	5	6	Natirae A	24	Not Applicable	0	0	28	2	0	2	1	1	1		1	1	7		3	2	0	0	1	1	0	1	0	0	0	0	0	0	0		1		0.943991	0		0
NA_024_035_H	NA_024_034_H_A01	NA_024_035	2022-03-29 16:29:00	5	6	Natirae A	24	Not Applicable	0	0	30	2	0	1	0	0	1		1	1	4		2	2	0	0	2	1	0	0	0	0	0	0	1	0	0		1		0.273053	0		0
NA_024_037_H	NA_024_037_H_A01	NA_024_037	2022-03-31 11:33:00	5	6	Natirae A	24	Not Applicable	0	0	25	2	0	1	0	0	6	Co-wife	2	1	3		1	2	0	0	1	1	1	0	0	0	0	0	0	0	0		1		0.835729	0		0
NA_024_038_H	NA_024_038_H_A01	NA_024_038	2022-03-29 15:43:00	5	6	Natirae A	24	Not Applicable	0	0	74	4	1	1	0	0	1		3	2	4		2	2	0	0	1	1	0	1	0	0	0	0	0	0	0		1		0.402395	0		0
NA_024_039_H	NA_024_039_H_A01	NA_024_039	2022-03-31 14:09:00	5	6	Natirae A	24	Not Applicable	0	0	31	2	0	2	0	0	1		1	1	10	Casual labour and small scale crop farming	4	2	0	0	1	1	1	0	0	0	0	0	0	0	0		1		0.179511	0		0
NA_024_040_H	NA_024_040_H_A01	NA_024_040	2022-03-31 14:27:00	5	6	Natirae A	24	Not Applicable	0	0	77	4	1	1	0	0	1		3	2	9		0	2	0	0	2	1	1	0	0	0	0	0	0	0	0		1		0	0		0
NA_024_041_H	NA_024_041_H_A01	NA_024_041	2022-03-31 13:49:00	5	6	Natirae A	24	Not Applicable	0	0	25	2	0	1	0	0	1		1	1	3		1	2	0	0	5	0	1	0	0	0	0	0	0	0	0		1		0.273053	0		0
NA_024_041_H	NA_024_041_H_A02	NA_024_041	2022-03-31 14:02:00	5	6	Natirae A	24	Not Applicable	0	0	40	2	0	2	0	0	2		1	1	3		1	2	0	0	2	1	1	0	0	0	0	0	0	0	0		1		0.273053	0		0
NA_024_042_H	NA_024_042_H_A01	NA_024_042	2022-03-31 10:36:00	5	6	Natirae A	24	Not Applicable	0	0	42	2	0	1	0	0	1		2	1	3		1	2	0	0	2	1	1	0	0	0	0	0	0	0	0		1		0	0		0
NA_024_043_H	NA_024_043_H_A01	NA_024_043	2022-03-29 13:26:00	5	6	Natirae A	24	Not Applicable	0	0	47	3	0	1	0	0	1		1	1	8		3	2	0	0	5	0	1	0	0	0	0	0	0	0	0		1		0.656218	0		0
NA_024_044_H	NA_024_044_H_A01	NA_024_044	2022-03-29 15:26:00	5	6	Natirae A	24	Not Applicable	0	0	38	2	0	1	0	0	1		2	1	3		1	2	0	0	2	1	1	0	0	0	0	0	0	0	0		1		0.829368	0		0
NA_024_044_H	NA_024_044_H_A02	NA_024_044	2022-03-29 15:31:00	5	6	Natirae A	24	Not Applicable	0	0	62	4	1	2	0	0	6	Brother-In-law	2	1	9		0	2	0	0	2	1	1	0	0	0	0	0	0	0	0		3		0.829368	0		0
NA_024_045_H	NA_024_045_H_A01	NA_024_045	2022-03-31 12:38:00	5	6	Natirae A	24	Not Applicable	0	0	32	2	0	1	1	1	1		2	1	3		1	2	0	0	2	1	0	1	0	0	0	0	0	0	1	Body pain	1		0.268542	0		0
NA_024_046_H	NA_024_046_H_A01	NA_024_046	2022-03-31 15:05:00	5	6	Natirae A	24	Not Applicable	0	0	35	2	0	1	0	0	1		2	1	3		1	2	0	0	2	1	1	0	0	0	0	0	0	0	0		1		0.268542	0		0
NA_024_048_H	NA_024_048_H_A02	NA_024_048	2022-03-29 14:43:00	5	6	Natirae A	24	Not Applicable	0	0	45	3	0	1	0	0	1		3	2	3		1	2	0	0	2	1	1	0	0	0	0	0	0	0	0		1		0.829368	0		0
NA_024_049_H	NA_024_049_H_A01	NA_024_049	2022-03-29 11:50:00	5	6	Natirae A	24	Not Applicable	0	0	24	1	0	2	2	2	1		1	1	4		2	2	0	0	1	1	1	0	0	0	0	0	0	0	0		1		0.541595	0		0
NA_025_001_H	NA_025_001_H_A02	NA_025_001	2022-04-01 17:14:00	5	6	Natirae B	25	Not Applicable	0	0	27	2	0	1	0	0	3		2	1	9		0	2	0	0	5	0	0	0	1	0	0	0	0	0	1	Joint and waist pain	3		0.656218	0		0
NA_025_001_H	NA_025_001_H_A01	NA_025_001	2022-04-01 16:56:00	5	6	Natirae B	25	Not Applicable	0	0	54	3	0	1	0	0	1		2	1	9		0	2	0	0	5	0	0	1	0	0	0	0	1	0	0		1		0.656218	0		0
NA_025_002_H	NA_025_002_H_A01	NA_025_002	2022-04-01 09:39:00	5	6	Natirae B	25	Not Applicable	0	0	35	2	0	1	0	0	1		1	1	8		3	2	0	0	2	1	1	0	0	0	0	0	0	0	0		1		0.656218	0		0
NA_025_006_H	NA_025_006_H_A01	NA_025_006	2022-04-01 10:50:00	5	6	Natirae B	25	Not Applicable	0	0	40	2	0	1	0	0	1		2	1	4		2	2	0	0	2	1	1	0	0	0	0	0	0	0	0		1		0.656218	0		0
NA_025_013_H	NA_025_013_H_A01	NA_025_013	2022-04-01 14:13:00	5	6	Natirae B	25	Not Applicable	0	0	76	4	1	2	0	0	1		3	2	3		1	2	0	0	2	1	0	0	0	0	0	0	0	0	1	Body pain	1		0.387676	0		0
NA_025_016_H	NA_025_016_H_A01	NA_025_016	2022-04-01 12:11:00	5	6	Natirae B	25	Not Applicable	0	0	72	4	1	1	0	0	5	Mother-In-law	2	1	9		0	2	0	0	5	0	0	0	0	0	1	0	0	0	0		1		0.383165	0		0
NA_025_017_H	NA_025_017_H_A01	NA_025_017	2022-04-01 11:25:00	5	6	Natirae B	25	Not Applicable	0	0	77	4	1	1	0	0	5		3	2	9		0	2	0	0	2	1	1	0	0	0	0	0	0	0	0		1		0.387676	0		0
NA_025_019_H	NA_025_019_H_A01	NA_025_019	2022-04-01 11:10:00	5	6	Natirae B	25	Not Applicable	0	0	37	2	0	1	0	0	1		2	1	4		2	2	0	0	5	0	0	0	1	0	0	0	0	0	0		1		1.1235	0		0
NA_025_019_H	NA_025_019_H_A02	NA_025_019	2022-04-01 11:13:00	5	6	Natirae B	25	Not Applicable	0	0	18	1	0	1	1	1	3		2	1	8		3	2	0	0	5	0	1	0	0	0	0	0	0	0	0		3		1.1235	0		0
NA_025_020_H	NA_025_020_H_A01	NA_025_020	2022-03-31 16:33:00	5	6	Natirae B	25	Not Applicable	0	0	30	2	0	1	1	1	1		2	1	8		3	2	1	1	2	1	1	0	0	0	0	0	0	0	0		1		0.541595	0		0
NA_025_021_H	NA_025_021_H_A01	NA_025_021	2022-04-01 11:48:00	5	6	Natirae B	25	Not Applicable	0	0	25	2	0	1	0	0	1		1	1	3		1	2	0	0	2	1	1	0	0	0	0	0	0	0	0		1		0	0		0
NA_025_025_H	NA_025_025_H_A01	NA_025_025	2022-04-01 15:48:00	5	6	Natirae B	25	Not Applicable	0	0	40	2	0	1	0	0	1		2	1	3		1	2	0	0	1	1	0	1	0	0	0	0	0	0	0		1		0.114623	0		0
NA_025_029_H	NA_025_029_H_A01	NA_025_029	2022-04-01 13:28:00	5	6	Natirae B	25	Not Applicable	0	0	51	3	0	1	0	0	1		2	1	3		1	2	0	0	1	1	0	0	1	0	0	0	1	0	0		1		1.1235	0		0
NA_025_029_H	NA_025_029_H_A02	NA_025_029	2022-04-01 13:30:00	5	6	Natirae B	25	Not Applicable	0	0	23	1	0	1	1	1	3		1	1	3		1	2	0	0	1	1	1	0	0	0	0	0	0	0	0		3		1.1235	0		0
NA_025_031_H	NA_025_031_H_A01	NA_025_031	2022-04-01 13:53:00	5	6	Natirae B	25	Not Applicable	0	0	40	2	0	1	0	0	1		2	1	3		1	2	0	0	2	1	0	0	0	0	0	0	0	0	1	Joint pain	1		0.656218	0		0
NA_025_032_H	NA_025_032_H_A01	NA_025_032	2022-04-01 15:20:00	5	6	Natirae B	25	Not Applicable	0	0	47	3	0	1	0	0	1		2	1	3		1	2	0	0	2	1	1	0	0	0	0	0	0	0	0		1		0.721107	0		0
NA_025_032_H	NA_025_032_H_A02	NA_025_032	2022-04-01 15:25:00	5	6	Natirae B	25	Not Applicable	0	0	85	4	1	1	0	0	5		2	1	9		0	2	0	0	2	1	1	0	0	0	0	0	0	0	0		1		0.721107	0		0
NA_025_033_H	NA_025_033_H_A01	NA_025_033	2022-04-01 16:40:00	5	6	Natirae B	25	Not Applicable	0	0	27	2	0	1	0	0	1		1	1	7		3	2	0	0	2	1	0	0	0	0	1	0	0	0	0		1		0.721107	0		0
NA_025_033_H	NA_025_033_H_A02	NA_025_033	2022-04-01 16:44:00	5	6	Natirae B	25	Not Applicable	0	0	28	2	0	2	1	1	2		1	1	8		3	2	0	0	2	1	0	1	0	0	0	0	0	0	0		1		0.721107	0		0
NA_025_034_H	NA_025_034_H_A02	NA_025_034	2022-03-31 16:05:00	5	6	Natirae B	25	Not Applicable	0	0	67	4	1	2	1	1	2		2	1	4		2	2	0	0	1	1	0	1	0	0	0	0	0	0	0		1		0.92948	0		0
NA_025_034_H	NA_025_034_H_A01	NA_025_034	2022-03-31 15:50:00	5	6	Natirae B	25	Not Applicable	0	0	56	3	0	1	0	0	1		2	1	3		1	2	0	0	1	1	1	0	0	0	1	0	0	0	0		1		0.92948	0		0
NA_025_036_H	NA_025_036_H_A01	NA_025_036	2022-03-31 16:15:00	5	6	Natirae B	25	Not Applicable	0	0	32	2	0	1	0	0	1		2	1	3		1	2	0	0	1	1	1	0	0	0	0	0	0	0	0		1		0.656218	0		0
NA_025_041_H	NA_024_041_H_A01	NA_025_041	2022-04-01 12:37:00	5	6	Natirae B	25	Not Applicable	0	0	25	2	0	1	1	1	1		1	1	5		2	2	0	0	2	1	0	1	0	0	0	0	0	0	0		1		1.1235	0		0
NA_025_041_H	NA_025_041_H_A02	NA_025_041	2022-04-01 12:38:00	5	6	Natirae B	25	Not Applicable	0	0	30	2	0	1	1	1	2		1	1	4		2	2	0	0	1	1	1	0	0	0	0	0	0	0	0		1		1.1235	0		0
NA_025_042_H	NA_025_042_H_A01	NA_025_042	2022-04-01 13:09:00	5	6	Natirae B	25	Not Applicable	0	0	25	2	0	1	1	1	1		2	1	4		2	2	0	0	5	0	0	0	0	0	0	0	0	0	1	Body pain	1		0.656218	0		0
NA_022_031_H	NA_022_031_H_A01	NA_022_031	2022-03-21 11:43:00	5	6	Atedeoi	22	Not Applicable	0	0	37	2	0	1	0	0	1		2	1	3		1	2	0	0	2	1	0	1	0	0	0	0	0	0	0		1		0	0		0
NA_009_003_H	NA_009_003_H_A01	NA_009_003	2022-02-10 16:08:00	4	7	Longaroi	9	Lore Apathiya	1	1	35	2	0	1	1	1	1		1	1	3		1	2	0	0	5	0	1	0	0	0	0	0	0	0	0		1		1.00888	0		0
NA_009_035_H	NA_009_035_H_A01	NA_009_035	2022-02-11 13:55:00	4	7	Longaroi	9	Lore Kaachuka	1	1	38	2	0	1	0	0	1		2	1	3		1	2	0	0	2	1	1	0	0	0	0	0	0	0	0		1		0	0		0
NA_009_071_H	NA_009_071_H_A02	NA_009_071	2022-02-10 08:57:00	4	7	Longaroi	9	Lore Kaamunyinakori	1	1	39	2	0	2	0	0	2		1	1	3		1	2	0	0	2	1	1	0	0	0	0	0	0	0	0		1		0	0		0
NA_009_079_H	NA_009_079_H_A02	NA_009 _079	2022-02-11 13:29:00	4	7	Longaroi	9	Lore Alomilimil	1	1	45	3	0	2	0	0	2		1	1	3		1	2	1	1	2	1	1	0	0	0	0	0	0	0	0		1		0.114623	0		0
NA_009_006_H	NA_009_006_H_A01	NA_009_006	2022-02-11 10:26:00	4	7	Longaroi	9	Lore Angakimak	1	0	35	2	0	1	0	0	1		1	1	3		1	2	0	0	4	1	1	0	0	0	0	0	0	0	0		1		0	0		0
NA_009_010_H	NA_009_010_H_A01	NA_009_010	2022-02-11 11:51:00	4	7	Longaroi	9	Lore Kaalbert	1	0	45	3	0	1	0	0	1		2	1	3		1	2	0	0	4	1	1	0	0	0	0	0	0	0	0		5	Neighbor's hut	0	0		0
NA_009_014_H	NA_009_014_H_A01	NA_009_014	2022-02-10 13:33:00	4	7	Longaroi	9	Lore Angimiroo	1	0	25	2	0	1	2	2	1		2	1	3		1	2	0	0	5	0	1	0	0	0	0	0	0	0	0		1		0.383165	0		0
NA_009_023_H	NA_009_023_H_A01	NA_009_023	2022-02-11 12:43:00	4	7	Longaroi	9	Lore Alogir	1	0	60	3	0	1	0	0	1		3	2	3		1	2	0	0	4	1	1	0	0	0	0	0	0	0	0		1		0.268542	0		0
NA_009_023_H	NA_009_026_H_A02	NA_009_023	2022-02-11 12:49:00	4	7	Longaroi	9	Lore Alogir	1	0	25	2	0	1	0	0	3		2	1	3		1	2	0	0	5	0	1	0	0	0	0	0	0	0	0		1		0.268542	0		0
NA_009_026_H	NA_009_026_H_A01	NA_009_026	2022-02-11 12:15:00	4	7	Longaroi	9	Lore Angimiroo	1	0	34	2	0	1	1	1	1		2	1	3		1	2	0	0	4	1	0	1	0	0	0	0	0	0	0		1		0.273053	0		0
NA_009_029_H	NA_009_029_H_A01	NA_009_029	2022-02-10 11:43:00	4	7	Longaroi	9	Lore Angimiroo	1	0	45	3	0	2	0	0	2		1	1	3		1	2	0	0	2	1	1	0	0	0	0	0	0	0	0		1		0	0		0
NA_009_029_H	NA_009_029_H_A01	NA_009_029	2022-02-10 11:39:00	4	7	Longaroi	9	Lore Angimiroo	1	0	41	2	0	1	0	0	1		1	1	3		1	2	0	0	3	1	1	0	0	0	0	0	0	0	0		1		0	0		0
NA_009_040_H	NA_009_040_H_A01	NA_009_040	2022-02-10 12:13:00	4	7	Longaroi	9	Lore Angimiroo	1	0	42	2	0	1	0	0	1		2	1	3		1	2	1	1	4	1	1	0	0	0	0	0	0	0	0		1		0.268542	0		0
NA_009_041_H	NA_009_041_H_A01	NA_009_041	2022-02-10 14:03:00	4	7	Longaroi	9	Lore Akanyangareng	1	0	48	3	0	1	1	1	1		2	1	3		1	2	0	0	4	1	0	0	0	0	0	0	0	0	1	Body pain	1		0	0		0
NA_009_076_H	NA_009_076_H_A01	NA_009_076	2022-02-10 09:30:00	4	7	Longaroi	9	Lore Kaamunyinakori	1	0	81	4	1	2	0	0	2		2	1	9		0	2	1	1	1	1	1	0	0	0	0	0	0	0	0		1		0	0		0
NA_009_081_H	NA_009_081_H_A01	NA_009_081	2022-02-11 08:41:00	4	7	Longaroi	9	Lore Kaamunyinakori	1	0	22	1	0	1	0	0	1		1	1	3		1	2	0	0	2	1	1	0	0	0	0	0	0	0	0		1		0	0		0
[truncated: 16 more columns]

## Sheet: codebook
Variable	description	type	categories
HH_id	household unique identifier	numeric,mixed
person_id	person unique identifier	numeric,mixed
Pupil_id	index child unique identifier
screen_date_hh	date of examination	day/month/year time
sub_county	sub county household is situated in	categorical	4: lotome, 5: matany, 11:Lokiteded T/C
parish_code	parish code	categorical	1:Dirtics, 2: Kalokengel, 3: Lokupi, 4: Lomuno, 5: Moruongor, 6: Nakichumet, 7:Nariamaregae
village_name	name of village household is situated in	character
village_id	village unique identifier	numeric
manyatta_name	name of manyatta household is situated in	character
HH_in_manyatta	household was situated in a manyatta	categorical	0: no, 1: yes
Index_case1_control0	study group of the household	categorical	0: control, 1: case
age	age of the participant, years	numeric
adult_age_groups	age group of the particpant, years	categorical	1: 18-24, 2: 25-44, 45-60, >60
adult_over60	particpant over 60 years	categorical	0: no, 1: yes
sex_F1_M2	sex of participant	categorical	1: female, 2: male
edu_adult	education level completed	categorical	0: none, 1: some primary, 2: complete primary, 3: some secondary, 4: complete secondary, 5: further
educ_recode	education level completed-recoded	categorical	0: none, 1: some primary, 2: more
relation_hhd	relationship to the head of household	categorical	1: self, 2: spouse, 3: child, 4: sibling, 5: parent, 6: other
oth_reltn_hhd	other relationship	character
marital_status	marital status	categorical	1: married monogamous, 2: married polygamous, 3: widowed, 4: single, 5: separated/ divorced
marital_recode	marital status- recoded	categorical	0: married, 1: not married
occupation_adult	occupation/ income source	categorical	1:full time employee, 2: part time employee, 3: casual labourer, 4: farming crops, 5: farming livestock, 6: fisherman, 7: selling food or other small-scale business, 8: selling alcohol, 9: none, 10: other
oth_occp_adult	other occupation/ income source	character
occupation_recode	occupation/ income source-recoded	categorical	0: none, 1: casual labour, 2: Farming (crops or livestock), 3: Selling goods (food, alcohol etc), 4: employed or other
religion	religion followed	categorical	1: muslim, 2: christian, 3: traditionist, 4: none, 5: other
disability	participant had a disability	categorical	0: none, 1: physical, 2: mental, 3: both
disability_recode	participant had a disability-recoded	categorical	0: no, 1: yes
alcohol_use	drinks alcohol	categorical	1: every day, 2: a few times a week, 3: once a week, 4: less, 5: never
alcoholuse_recode	drinks alcohol-recoded	categorical	0: no, 1: yes
other_current_ilnss___1	other current illness_none	categorical	0: no, 1: yes
other_current_ilnss___2	other current illness_Respiratory, chest,cough, nose	categorical	0: no, 1: yes
other_current_ilnss___3	other current illness_diarrhea, stomach	categorical	0: no, 1: yes
other_current_ilnss___4	other current illness_skin rashes	categorical	0: no, 1: yes
other_current_ilnss___5	other current illness_eye	categorical	0: no, 1: yes
other_current_ilnss___6	other current illness_ear	categorical	0: no, 1: yes
other_current_ilnss___7	index child current other illness-headache	categorical	0: no, 1: yes
other_current_ilnss___8	index child current other illness-fever/malaria	categorical	0: no, 1: yes
other_current_ilnss___9	index child current other illness-other	categorical	0: no, 1: yes
other_ilness_adult	other current illness	character
sleep_place	sleeping place of the adult	categorical	1: main house, 2: kitchen hut, 3: separate hut, 5: other
other_sleeping_place	other sleeping place of the adult	categorical
SESfactor	socio-economic status factor of household	numeric
tunga_hands	fleas observed in hands	categorical	0: no, 1: yes
no_lesions_hands	number of fleas in hands	numeric
tunga_feet	fleas observed in feet	categorical	0: no, 1: yes
total_live_flea_count	number of live fleas in both feet	numeric
total_dead_flea_count	number of dead fleas in both feet	numeric
total_manip_count	number of manipulated lesions in both feet	numeric
total_fleas	number of all flea types in both feet	numeric
total_cluster_count	number of flea clusters in both feet	numeric
cluster_score	cluster score	numeric	number of clusters x 5
INFECTN_INTENS	infection intensity	numeric	total number of all fleas + cluster score
total_pskin_count	number of sites on both feet with peeling skin (desquamation)	numeric	maximum of 18, 9 sites per foot (5 toes, medial side, lateral side, sole & heel)
total_cracks_count	number of sites on both feet with cracked skin (fissures)	numeric	maximum of 18, 9 sites per foot (5 toes, medial side, lateral side, sole & heel)
total_ulcer_count	number of sites on both feet with ulcers	numeric	maximum of 18, 9 sites per foot (5 toes, medial side, lateral side, sole & heel)
total_abscess_count	number of sites on both feet with abscesses	numeric	maximum of 18, 9 sites per foot (5 toes, medial side, lateral side, sole & heel)
total_ACUTE	total acute pathology score	numeric	sum of acute pathologies
total_hardskin_count	number of sites on both feet with hard skin (hyperkeratosis)	numeric	maximum of 18, 9 sites per foot (5 toes, medial side, lateral side, sole & heel)
total_thickskinnails_count	number of sites on both feet with thick skin around nails (peri-ungual hyperkeratosis)	numeric	maximum of 10, 5 sites per foot (5 toes)
total_deformednails_count	number of sites on both feet with deformed nails	numeric	maximum of 10, 5 sites per foot (5 toes)
total_lostnails_count	number of sites on both feet with lost nails	numeric	maximum of 10, 5 sites per foot (5 toes)
total_CHRONIC	total chronic pathology score	numeric	sum of chronic pathologies
total_PATHOL	total pathology score	numeric	sum of all pathologies
total_INFRARED	number of sites on both feet withinfra-red hotspots	numeric
total_ACUTEwIR	total acute pathology score including infra-red	numeric
total_PATHwIR	total all pathology score including infra-red	numeric
