# Supplementary material for: High density rural settlements, parenting behavior and child disability are significant factors associated with tungiasis in Karamoja, northeastern Uganda: a case control study
Source: Research Square preprint supplement (doi:10.21203/rs.3.rs-7288997/v1), 2025-08-20
Supplement: Supplementary file 5 [file c4b2fda7152ca04331c61a1b.xlsx]

## Sheet: cover
High density rural settlements, parenting behavior and child disability are significant factors associated with the high prevalence of tungiasis in Karamoja, northeastern Uganda: a case control study.
Lynne Elson1,2, Abneel K. Matharu3, Berrick Otieno4, Herman Feldmeier5, Charles Waiswa6, Amina Abubakar4, Jürgen Krücken7,8, Ulrike Fillinger4, Francis Mutebi6 *
1 KEMRI-Wellcome Trust Research Programme, Kilifi, Kenya
2 Centre for Tropical Medicine and Global Health, Nuffield Department of Medicine, University of Oxford, Oxford, United Kingdom.
3 International Centre of Insect Physiology and Ecology (ICIPE), Human Health Theme, Nairobi, Kenya
4 Institute for Human Development, Aga Khan University, Nairobi, Kenya
5Institute of Microbiology, Infectious Diseases and Immunology, Charité University Medicine, Berlin, Germany
6 College of Veterinary Medicine, Animal Resources and Biosecurity, Makerere University, Kampala, Uganda
7 Institute for Parasitology and Tropical Veterinary Medicine, Freie Universität Berlin, Berlin, Germany
8 Veterinary Centre for Resistance Research, Freie Universität Berlin, Berlin, Germany
*Correspondence
francis.mutebi@mak.ac.ug

## Sheet: description
Project Name	Ecology of tungiasis
File Name	Elson Karamoja HH Risk Factor dataset
Description	Data collected January to March 2022 during interviews of caregivers in Karamoja, Uganda
number of variables	162
number of observations	568
size of dataset	487 kb

## Sheet: data
HH_id	HH_group_1case_0control	hh_sub_county_id	hh_parish	hh_parish_code	village_name	village_id	hh_mannyatta_name	HH_in_manyatta	Pupil_id	sex_index_child	indexchild_age	sex_hhd	age_hhd	sex_caregiver	age_caregiver	adult_over_60_in_hh	respondent_relation_index_child	other_respondent_relation	respondent_relation_index_recode	indexchild_reln_hhd	other_relation_hhd	indexchild_rel_HHH_recode	SES	land_status	land_status_recode	own_farming_land	radio	tv	mobile_phone	bicycle	motor_cycle	solar	vehicle	brew_alcohol_atHH	water_source	water_source_recode	mode_to_collect_water___1	mode_to_collect_water___2	mode_to_collect_water___3	mode_to_collect_water___4	mode_to_collect_water___5	mode_to_collect_water___6	water_storage_cont	water_storage___1	water_storage___2	water_storage___3	water_storage___4	water_storage___5	oth_water_sto_cont
NA_017_065_H	0	4	Lomuno	4	Lopuu	17	Lore Alokol	1	NA_017_065	1	13	2	94	2	94	1	2		1	2		2	0	1	1	1	0	0	0	0	0	0	0	0	4	2	0	0	0	0	1	0	0	0	0	0	0	0
NA_017_056_H	1	4	Lomuno	4	Lopuu	17	Lore Apalomoe	1	NA_017_056	1	8	2	92	2	92	1	2		1	2		2	0	1	1	1	0	0	0	0	0	0	0	0	4	2	0	0	0	0	1	0	0	0	0	0	0	0
NA_023_029_H	0	11	Dirtics	1	Kotipe	23	Not applicable	0	NA_023_029	2	14	2	91	2	91	1	2		1	2		2	0	3	0	1	0	0	0	0	0	0	0	0	5	3	0	0	0	0	1	0	1	1	0	0	0	0
NA_003_014_H	1	4	Kalokengel	2	Naregei-Nakoreete	3	Lore Apokomol	1	NA_003_014	1	9	2	91	2	91	1	2		1	2		2	0	1	1	1	0	0	0	0	0	0	0	0	4	2	0	0	0	0	1	0	1	1	0	0	0	0
NA_002_105_H	1	4	Kalokengel	2	Loroo	2	Lore Kaaguma	1	NA_002_105	2	8	2	81	2	81	1	2		1	2		2	0	1	1	1	0	0	0	0	0	0	0	0	4	2	1	0	0	1	0	0	1	1	0	0	0	0
NA_009_076_H	0	4	Nariamaregae	7	Longaroi	9	Lore Kaamunyinakori	1	NA_009_076	2	13	2	74	1	81	1	1		0	1		1	0	1	1	1	0	0	0	0	0	0	0	0	5	3	0	0	0	1	0	0	1	1	0	0	0	0
NA_011_018_H	1	4	Lomuno	4	Adwaramukuny	11	Lore Alonges	1	NA_011_018	2	9	2	80	2	80	1	2		1	2		2	0	1	1	1	0	0	0	0	0	0	0	0	4	2	0	0	0	1	0	0	1	1	0	0	0	0
NA_002_068_H	1	4	Kalokengel	2	Loroo	2	Lore Alotukei	1	NA_002_068	1	10	2	80	2	80	1	2		1	2		2	0	1	1	1	0	0	0	0	0	0	0	0	4	2	0	0	0	1	0	0	1	1	0	0	0	0
NA_013_075_H	1	4	Lomuno	4	Nakaramwae	13	Lore Amerinyang	1	NA_013_075	2	8	2	39	2	79	1	2		1	1		1	0	1	1	1	0	0	0	0	0	0	0	1	4	2	0	0	0	0	1	0	1	1	0	0	0	0
NA_020_063_H	0	5	Lokupoi	3	Lokupoi TC -Lokitela	20	Lore Akotol	1	NA_020_063	1	8	2	78	2	78	1	2		1	2		2	0	1	1	1	0	0	0	0	0	0	0	0	4	2	0	0	0	0	1	0	0	0	0	0	0	0
NA_024_040_H	0	5	Nakichumet	6	Natirae A	24	Not applicable	0	NA_024_040	2	8	2	77	2	77	1	2		1	2		2	0	1	1	1	0	0	0	0	0	0	0	0	5	3	0	0	0	0	1	0	1	1	0	0	0	0
NA_003_021_H	1	4	Kalokengel	2	Naregei-Nakoreete	3	Lore Apokomol	1	NA_003_021	2	11	2	77	2	77	1	1		0	1		1	0	1	1	1	0	0	0	0	0	0	0	0	4	2	0	0	0	0	1	0	1	1	0	0	0	0
NA_003_054_H	1	4	Kalokengel	2	Naregei-Nakoreete	3	Lore Apokomol	1	NA_003_054	2	12	2	52	2	77	1	2		1	1		1	0.556315	1	1	1	1	0	1	0	0	0	0	1	4	2	0	0	0	0	1	0	1	1	0	0	0	0
NA_025_017_H	0	5	Nakichumet	6	Natirae B	25	Not applicable	0	NA_025_017	1	11	2	34	2	77	1	2		1	2		2	0.387676	1	1	1	0	0	0	1	0	0	0	0	5	3	0	0	0	0	1	0	1	1	0	0	0	0
NA_002_059_H	0	4	Kalokengel	2	Loroo	2	Lore Aichumar	1	NA_002_059	2	8	2	23	2	77	1	2		1	1		1	0.735827	1	1	1	1	0	1	0	0	1	0	1	5	3	1	0	0	0	1	0	1	1	0	0	0	0
NA_017_004_H	1	4	Lomuno	4	Lopuu	17	Lore Lokiteded	1	NA_017_004	1	14	2	76	2	76	1	1		0	1		1	0.850449	1	1	1	1	0	1	0	0	1	0	1	4	2	0	0	0	1	0	0	0	0	0	0	0	0
NA_024_017_H	0	5	Nakichumet	6	Natirae A	24	Not applicable	0	NA_024_017	1	9	2	76	2	76	1	2		1	2		2	0.541595	1	1	1	0	0	1	1	0	0	0	0	5	3	0	0	0	0	1	0	1	1	0	0	0	1	Bucket
NA_025_013_H	0	5	Nakichumet	6	Natirae B	25	Not applicable	0	NA_025_013	2	14	1	76	1	76	1	2		1	2		2	0.387676	3	0	1	0	0	0	1	0	0	0	0	4	2	0	0	0	0	1	0	1	1	0	0	0	0
NA_011_026_H	1	4	Lomuno	4	Adwaramukuny	11	Lore Alokooruk	1	NA_011_026	2	10	2	75	2	75	1	2		1	2		2	0	1	1	1	0	0	0	0	0	0	0	0	4	2	0	0	0	1	0	0	1	1	0	0	0	0
NA_007_015_H	1	4	Kalokengel	2	Angarab	7	Lore Aloyor	1	NA_007_015	1	9	2	25	1	75	1	2		1	1		1	0	1	1	1	0	0	0	0	0	0	0	0	4	2	0	0	0	0	1	0	1	1	0	0	0	0
NA_002_107_H	1	4	Kalokengel	2	Loroo	2	Lore Alolem	1	NA_002_107	2	9	2	25	2	75	1	2		1	1		1	0	1	1	1	0	0	0	0	0	0	0	1	4	2	1	0	0	1	0	0	1	1	0	0	1	0
NA_024_038_H	0	5	Nakichumet	6	Natirae A	24	Not applicable	0	NA_024_038	1	13	2	74	2	74	1	2		1	2		2	0.402395	1	1	1	1	0	0	0	0	0	0	0	4	2	0	0	0	0	1	0	1	1	0	0	0	0
NA_014_049_H	0	4	Moruongor	5	Naoi	14	Lore Aichongat	1	NA_014_049	2	12	2	74	2	74	1	2		1	2		2	0.273053	1	1	1	0	0	0	1	0	0	0	0	4	2	0	0	0	1	0	0	1	1	0	0	0	0
NA_012_008_H	1	4	Kalokengel	2	Naitakwae	12	Lore Apalotom	1	NA_012_008	2	8	2	72	2	72	1	2		1	2		2	0	1	1	1	0	0	0	0	0	0	0	0	4	2	0	0	0	0	1	0	1	1	0	0	0	1	Watering can
NA_020_013_H	0	5	Lokupoi	3	Lokupoi TC -Lokitela	20	Lore Alokai	1	NA_020_013	2	13	2	72	2	72	1	2		1	2		2	0	1	1	1	0	0	0	0	0	0	0	0	4	2	0	0	0	1	0	0	1	1	0	0	0	0
NA_025_016_H	0	5	Nakichumet	6	Natirae B	25	Not applicable	0	NA_025_016	1	10	2	40	2	72	1	2		1	2		2	0.383165	1	1	1	0	0	1	0	0	0	0	0	5	3	0	0	0	0	1	0	1	1	0	0	0	1	Bucket
NA_023_012_H	0	11	Dirtics	1	Kotipe	23	Not applicable	0	NA_023_012	2	10	2	71	2	71	1	2		1	2		2	0.452564	1	1	1	0	0	0	1	0	1	0	1	5	3	0	0	0	0	1	0	1	1	0	1	0	0
NA_016_067_H	1	4	Kalokengel	2	Lominit	16	Lore Achuule	1	NA_016_067	1	8	2	40	2	71	1	2		1	1		1	0	3	0	1	0	0	0	0	0	0	0	0	4	2	0	0	0	1	0	0	0	0	0	0	0	0
NA_003_010_H	1	4	Kalokengel	2	Naregei-Nakoreete	3	Lore Kaaguma	1	NA_003_010	1	13	2	33	1	71	1	2		1	1		1	0.541595	1	1	0	0	0	1	1	0	0	0	1	4	2	0	0	0	0	1	0	1	1	0	0	0	0
NA_011_020_H	1	4	Lomuno	4	Adwaramukuny	11	Lore Alonges	1	NA_011_020	2	14	2	70	2	70	1	2		1	2		2	0.268542	1	1	1	0	0	1	0	0	0	0	0	4	2	0	0	0	1	0	0	1	0	0	0	0	1	Watering can
NA_017_021_H	1	4	Lomuno	4	Lopuu	17	Lore Lokiteded	1	NA_017_021	2	13	2	70	2	70	1	1		0	1		1	0	2	0	1	0	0	0	0	0	0	0	0	4	2	0	0	0	1	0	0	0	0	0	0	0	0
NA_018_028_H	0	4	Moruongor	5	Kaingolejek	18	Lore Apooreng	1	NA_018_028	1	9	2	70	2	70	1	2		1	2		2	0	1	1	1	0	0	0	0	0	0	0	0	4	2	0	0	0	1	0	0	1	1	0	0	0	0
NA_023_041_H	0	11	Dirtics	1	Kotipe	23	Not applicable	0	NA_023_041	2	9	2	70	2	70	1	2		1	2		2	0.273053	1	1	0	0	0	0	1	0	0	0	0	2	1	0	0	0	0	1	0	1	1	0	0	0	0
NA_014_080_H	1	4	Moruongor	5	Naoi	14	Lore Keekwaputh	1	NA_014_080	2	10	2	70	2	70	1	2		1	2		2	0	3	0	0	0	0	0	0	0	0	0	0	4	2	0	0	0	1	0	0	1	1	1	0	0	0
NA_020_035_H	0	5	Lokupoi	3	Lokupoi TC -Lokitela	20	Lore Apaangakorio	1	NA_020_035	1	8	2	70	2	70	1	2		1	2		2	0.268542	1	1	1	0	0	1	0	0	0	0	0	4	2	0	0	0	1	0	0	1	1	0	0	0	0
NA_017_063_H	0	4	Lomuno	4	Lopuu	17	Lore Apalomoe	1	NA_017_063	2	14	2	70	2	70	1	2		1	2		2	0	1	1	1	0	0	0	0	0	0	0	0	4	2	0	0	0	0	1	0	1	1	1	0	0	0
NA_010_096_H	1	4	Moruongor	5	Loolim	10	Not applicable	0	NA_010_096	1	11	2	25	2	70	1	2		1	1		1	0	3	0	1	0	0	0	0	0	0	0	0	4	2	0	0	0	1	0	0	1	1	0	0	0	0
NA_011_037_H	1	4	Lomuno	4	Adwaramukuny	11	Lore Alonges	1	NA_011_037	2	8	2	69	2	69	1	2		1	2		2	0	1	1	0	0	0	0	0	0	0	0	0	4	2	0	0	0	1	0	0	1	1	0	0	0	0
NA_017_054_H	1	4	Lomuno	4	Lopuu	17	Lore Apalomoe	1	NA_017_054	2	12	2	68	2	68	1	2		1	2		2	0.268542	1	1	1	0	0	1	0	0	0	0	0	4	2	0	0	0	1	0	0	0	0	0	0	0	0
NA_007_029_H	1	4	Kalokengel	2	Angarab	7	Lore Kaabura	1	NA_007_029	2	8	2	66	2	66	1	2		1	2		2	0	3	0	1	0	0	0	0	0	0	0	0	4	2	0	0	0	0	1	0	1	1	0	0	0	0
NA_017_001_H	0	4	Lomuno	4	Lopuu	17	Lore Apalomoe	1	NA_017_001	1	14	1	66	1	66	1	1		0	1		1	0	3	0	1	0	0	0	0	0	0	0	0	4	2	0	0	0	0	1	0	1	1	0	0	0	0
NA_022_016_H	0	5	Nakichumet	6	Atedeoi	22	Not applicable	0	NA_022_016	2	11	2	65	2	65	1	2		1	2		2	0.656218	1	1	0	0	0	1	1	0	0	0	0	5	3	0	1	0	0	1	0	1	1	0	0	0	0
NA_017_033_H	0	4	Lomuno	4	Lopuu	17	Lore Alokol	1	NA_017_033	1	14	2	65	2	65	1	1		0	1		1	0.268542	1	1	1	0	0	1	0	0	0	0	0	4	2	0	0	0	0	1	0	0	0	0	0	0	0
NA_014_087_H	0	4	Moruongor	5	Naoi	14	Lore Aichongat	1	NA_014_087	1	8	2	65	2	65	1	2		1	2		2	0	1	1	0	0	0	0	0	0	0	0	0	4	2	0	0	0	0	1	0	1	1	0	0	0	0
NA_016_005_H	1	5	Kalokengel	2	Lominit	16	Lore Achuule	1	NA_016_005	2	11	2	30	2	65	1	2		1	1		1	0	2	0	1	0	0	0	0	0	0	0	1	4	2	0	0	0	1	0	0	0	0	0	0	0	0
NA_002_067_H	1	4	Kalokengel	2	Loroo	2	Lore Alotukei	1	NA_002_067	1	11	2	28	2	65	1	2		1	1		1	0.721107	1	1	1	0	0	1	1	0	1	0	1	4	2	0	0	0	1	0	0	1	1	0	0	0	0
NA_023_009_H	0	11	Dirtics	1	Kotipe	23	Not applicable	0	NA_023_009	1	12	1	66	2	64	1	1		0	1		1	0.114623	1	1	1	0	0	0	0	0	0	0	0	2	1	0	0	0	0	1	0	1	1	0	0	0	1	Bucket
NA_008_036_H	1	4	Moruongor	5	Naronit	8	Lore Akodet	1	NA_008_036	1	8	2	64	2	64	1	2		1	2		2	0.268542	1	1	1	0	0	1	0	0	0	0	0	4	2	0	0	0	1	0	0	1	1	0	0	0	0
NA_013_062_H	1	4	Lomuno	4	Nakaramwae	13	Lore Alochiyo	1	NA_013_062	2	10	2	64	2	64	1	2		1	2		2	0.114623	3	0	1	0	0	0	0	0	0	0	1	4	2	0	0	0	0	1	0	1	1	0	0	0	0
NA_010_069_H	0	4	Moruongor	5	Loolim	10	Not applicable	0	NA_010_069	2	13	2	63	2	63	1	2		1	2		2	0	3	0	0	0	0	0	0	0	0	0	0	4	2	0	0	0	1	0	0	1	1	0	0	0	0
NA_022_007_H	0	5	Nakichumet	6	Atedeoi	22	Not applicable	0	NA_022_007	1	13	2	63	2	63	1	2		1	2		2	0.383165	1	1	1	0	0	1	0	0	0	0	0	5	3	0	0	0	0	1	0	1	1	0	0	0	0
NA_022_039_H	0	5	Nakichumet	6	Atedeoi	22	Not applicable	0	NA_022_039	1	12	2	62	1	62	1	2		1	2		2	0.383165	1	1	0	0	0	1	0	0	0	0	0	5	3	0	0	0	0	1	0	1	1	0	0	0	0
NA_022_047_H	0	5	Nakichumet	6	Atedeoi	22	Not applicable	0	NA_022_047	1	14	2	62	2	62	1	2		1	2		2	0	1	1	1	0	0	0	0	0	0	0	0	5	3	0	0	0	0	1	0	1	1	0	0	0	1	Bucket
NA_010_049_H	0	4	Moruongor	5	Loolim	10	Lore Alokoi	1	NA_010_049	2	13	2	61	2	61	1	1		0	1		1	0	1	1	1	0	0	0	0	0	0	0	1	4	2	0	0	0	1	0	0	1	1	0	0	0	0
NA_022_032_H	0	5	Nakichumet	6	Atedeoi	22	Not applicable	0	NA_022_032	1	11	2	61	2	61	1	2		1	2		2	0	1	1	0	0	0	0	0	0	0	0	0	5	3	0	0	0	0	1	0	1	1	0	0	0	0
NA_004_085_H	1	4	Lomuno	4	Naoyaminit	4	Lore Apalowal	1	NA_004_085	1	9	2	61	2	61	1	1		0	1		1	0	1	1	0	0	0	0	0	0	0	0	0	4	2	0	0	0	1	0	0	1	1	0	0	0	0
NA_001_013_H	1	4	Kalokengel	2	Lobei	1	Lore Nakaao	1	NA_001_013	1	9	2	70	1	60	1	1		0	1		1	0	1	1	1	0	0	0	0	0	0	0	0	4	2	0	0	0	0	1	0	0	0	0	0	0	0
NA_007_038_H	1	4	Kalokengel	2	Angarab	7	Lore Aloyor	1	NA_007_038	2	12	2	60	2	60	0	1		0	1		1	0.273053	1	1	1	0	0	0	1	0	0	0	1	4	2	0	0	0	0	1	0	1	1	0	0	0	0
NA_009_023_H	0	4	Nariamaregae	7	Longaroi	9	Lore Alogir	1	NA_009_023	1	12	2	60	2	60	0	2		1	2		2	0.268542	2	0	1	0	0	1	0	0	0	0	0	4	2	0	0	0	1	0	0	1	1	0	0	0	0
NA_010_048_H	0	4	Moruongor	5	Loolim	10	Lore Apalomwae	1	NA_010_048	1	11	2	60	2	60	0	2		1	2		2	0	1	1	1	0	0	0	0	0	0	0	0	4	2	0	0	0	1	0	0	1	1	0	0	0	0
NA_012_023_H	1	4	Kalokengel	2	Naitakwae	12	Lore Apalotom	1	NA_012_023	2	10	2	60	2	60	0	2		1	2		2	0	3	0	1	0	0	0	0	0	0	0	0	4	2	0	0	0	0	1	0	1	1	0	0	0	0
NA_012_035_H	1	4	Kalokengel	2	Naitakwae	12	Lore Apalotom	1	NA_012_035	1	8	2	60	2	60	0	2		1	2		2	1.1235	3	0	1	1	0	1	1	0	1	0	0	4	2	0	0	0	0	1	0	1	1	0	0	0	0
NA_016_054_H	0	4	Kalokengel	2	Lominit	16	Lore Achuule	1	NA_016_054	2	9	2	60	2	60	0	1		0	1		1	0.541595	3	0	1	0	0	1	1	0	0	0	1	4	2	0	0	0	1	0	0	0	0	0	0	0	0
NA_022_005_H	0	5	Nakichumet	6	Atedeoi	22	Not applicable	0	NA_022_005	2	10	2	60	2	60	0	1		0	1		1	0.835729	1	1	1	0	0	1	1	0	1	0	0	5	3	0	0	0	0	1	0	1	1	0	0	0	1	Bucket
NA_022_009_H	0	5	Nakichumet	6	Atedeoi	22	Not applicable	0	NA_022_009	1	9	2	60	2	60	0	2		1	2		2	0.268542	3	0	1	0	0	1	0	0	0	0	0	5	3	0	0	0	0	1	0	0	0	0	0	0	0
NA_022_046_H	0	5	Nakichumet	6	Atedeoi	22	Not applicable	0	NA_022_046	1	10	2	60	2	60	0	4		1	4		3	0.656218	1	1	1	0	0	1	1	0	0	0	0	5	3	0	1	0	0	0	0	1	1	0	0	0	0
NA_016_020_H	0	4	Kalokengel	2	Lominit	16	Lore Achuule	1	NA_016_020	2	13	2	60	2	60	0	1		0	1		1	0.448054	3	0	1	0	0	1	0	0	1	0	1	4	2	0	0	0	1	0	0	1	0	0	0	0	1	Bucket
NA_021_049_H	0	5	Nakichumet	6	Kanaura	21	Not applicable	0	NA_021_049	1	8	2	60	2	60	0	2		1	2		2	0	1	1	1	0	0	0	0	0	0	0	0	2	1	0	0	0	1	0	0	1	1	0	0	0	0
NA_005_034_H	1	4	Kalokengel	2	Nachuka	5	Lore Kaapuun	1	NA_005_034	1	8	2	60	2	60	0	2		1	2		2	0	1	1	1	0	0	0	0	0	0	0	1	4	2	0	0	0	0	1	0	1	1	0	0	0	0
NA_001_020_H	1	4	Kalokengel	2	Lobei	1	Lore Kaabura	1	NA_001_020	2	10	2	25	2	60	0	2		1	4		3	0.402395	1	1	1	1	0	0	0	0	0	0	0	4	2	0	0	0	1	1	0	0	0	0	0	0	0
NA_022_019_H	0	5	Nakichumet	6	Atedeoi	22	Not applicable	0	NA_022_019	1	8	2	58	2	58	0	1		0	1		1	0.387676	1	1	1	0	0	0	1	0	0	0	0	4	2	0	0	0	0	1	0	1	1	0	0	0	0
NA_023_031_H	0	11	Dirtics	1	Kotipe	23	Not applicable	0	NA_023_031	2	14	2	58	2	58	0	1		0	1		1	0.721107	1	1	1	0	0	1	1	0	1	0	0	5	3	0	0	0	0	1	0	1	1	0	0	0	1	Bucket
NA_001_030_H	0	4	Kalokengel	2	Lobei	1	Lore Kaabura	1	NA_001_030	1	12	2	58	2	58	0	1		0	1		1	0	1	1	1	0	0	0	0	0	0	0	0	4	2	0	0	0	1	1	0	0	0	0	0	0	0
NA_003_027_H	1	4	Kalokengel	2	Naregei-Nakoreete	3	Lore Apokomol	1	NA_003_027	2	13	2	58	2	58	0	1		0	1		1	0	3	0	1	0	0	0	0	0	0	0	0	4	2	0	0	0	0	1	0	1	0	1	0	0	0
NA_001_002_H	1	4	Kalokengel	2	Lobei	1	Lore Nakaao	1	NA_001_002	2	9	2	38	1	58	0	1		0	1		1	0.656218	1	1	1	0	0	1	1	0	0	0	1	4	2	0	0	0	1	1	0	0	0	0	0	0	0
NA_006_019_H	1	4	Kalokengel	2	Akwapuwa-Loluk	6	Lore Alotimong	1	NA_006_019	2	14	1	61	2	57	1	1		0	1		1	0	1	1	1	0	0	0	0	0	0	0	0	5	3	0	0	0	1	0	0	1	1	0	0	0	0
NA_004_068_H	1	4	Lomuno	4	Naoyaminit	4	Lore Apalowal	1	NA_004_068	2	10	2	57	2	57	0	4		1	4		3	0	1	1	1	0	0	0	0	0	0	0	0	4	2	0	0	0	1	0	0	1	1	0	0	0	0
NA_002_060_H	1	4	Kalokengel	2	Loroo	2	Lore Aichumar	1	NA_002_060	2	8	2	40	2	57	0	2		1	1		1	0	2	0	1	0	0	0	0	0	0	0	0	4	2	1	0	0	0	1	0	1	1	0	0	0	0
NA_004_035_H	1	4	Lomuno	4	Naoyaminit	4	Lore Alouro	1	NA_004_035	1	8	2	32	2	57	0	4		1	1		1	0	1	1	1	0	0	0	0	0	0	0	0	4	2	0	0	0	1	0	0	1	1	0	0	0	0
NA_017_036_H	1	4	Lomuno	4	Lopuu	17	Lore Lokiteded	1	NA_017_036	1	9	2	56	2	56	0	1		0	1		1	0.294134	1	1	0	0	0	0	0	0	1	0	0	4	2	0	0	0	1	0	0	0	0	0	0	0	0
NA_025_034_H	0	5	Nakichumet	6	Natirae B	25	Not applicable	0	NA_025_034	2	11	2	56	2	56	0	1		0	1		1	0.92948	1	1	1	1	0	1	1	1	0	0	1	4	2	0	0	0	0	1	0	1	1	0	0	0	0
NA_003_053_H	1	4	Kalokengel	2	Naregei-Nakoreete	3	Lore Apokomol	1	NA_003_053	2	10	2	56	2	56	0	1		0	1		1	0.179511	1	1	1	0	0	0	0	0	1	0	1	4	2	0	0	0	0	1	0	1	1	0	0	0	0
NA_008_019_H	1	4	Moruongor	5	Naronit	8	Lore Alokawa	1	NA_008_019	2	10	2	55	2	55	0	4		1	4		3	0	3	0	1	0	0	0	0	0	0	0	0	4	2	0	0	0	1	0	0	1	1	0	0	0	0
NA_014_048_H	1	4	Moruongor	5	Naoi	14	Lore Keekwaputh	1	NA_014_048	2	11	1	55	2	55	0	2		1	2		2	0	3	0	0	0	0	0	0	0	0	0	0	4	2	0	0	0	1	0	0	1	1	0	0	0	0
NA_024_009_H	0	5	Nakichumet	6	Natirae A	24	Not applicable	0	NA_024_009	2	12	2	55	2	55	0	1		0	1		1	0.75633	1	1	1	0	0	1	1	1	0	0	0	4	2	0	0	0	0	1	0	1	1	0	0	0	1	Bucket
NA_009_004_H	1	4	Nariamaregae	7	Longaroi	9	Lore Angimiroo	1	NA_009_004	2	13	2	55	2	55	0	1		0	4		3	0	1	1	1	0	0	0	0	0	0	0	0	4	2	0	0	0	1	0	0	1	1	0	0	0	0
NA_010_076_H	0	4	Moruongor	5	Loolim	10	Not applicable	0	NA_010_076	2	12	1	55	1	55	0	1		0	1		1	1.00888	2	0	1	1	0	1	1	0	1	0	0	4	2	0	0	0	1	0	0	1	1	0	0	0	0
NA_022_006_H	0	5	Nakichumet	6	Atedeoi	22	Not applicable	0	NA_022_006	2	9	2	55	2	55	0	2		1	2		2	0.387676	1	1	0	0	0	0	1	0	0	0	0	5	3	0	0	1	0	1	0	1	1	0	0	0	0
NA_025_001_H	0	5	Nakichumet	6	Natirae B	25	Not applicable	0	NA_025_001	1	10	2	54	2	54	0	1		0	1		1	0.656218	1	1	0	0	0	1	1	0	0	0	0	5	3	0	0	0	0	1	0	1	1	0	0	0	0
NA_015_061_H	0	4	Moruongor	5	Naitakosowan	15	Lore Kaakol	1	NA_015_061	1	12	2	54	2	54	0	1		0	1		1	0	2	0	1	0	0	0	0	0	0	0	0	4	2	0	0	0	1	0	0	1	1	0	0	0	0
NA_006_071_H	1	4	Kalokengel	2	Akwapuwa-Loluk	6	Lore Apakarengit	1	NA_006_071	2	13	2	54	2	54	0	1		0	1		1	0	1	1	1	0	0	0	0	0	0	0	0	4	2	0	0	0	1	0	0	1	1	0	0	0	0
NA_011_006_H	1	4	Lomuno	4	Adwaramukuny	11	Lore Angikatap	1	NA_011_006	1	9	2	54	2	54	0	1		0	1		1	0	1	1	0	0	0	0	0	0	0	0	0	4	2	0	0	0	1	0	0	1	1	0	0	0	0
NA_002_090_H	1	4	Kalokengel	2	Loroo	2	Lore Alotukei	1	NA_002_090	2	9	2	53	2	53	0	2		1	2		2	0.268542	1	1	1	0	0	1	0	0	0	0	1	4	2	0	0	0	1	0	0	1	1	0	0	0	0
NA_011_017_H	1	4	Lomuno	4	Adwaramukuny	11	Lore Alonges	1	NA_011_017	1	10	2	53	2	53	0	2		1	2		2	0.943991	3	0	1	1	0	1	1	0	0	0	0	4	2	0	0	0	1	0	0	1	1	0	0	0	0
NA_016_029_H	0	4	Kalokengel	2	Lominit	16	Lore Apalopale	1	NA_016_029	1	13	2	53	2	53	0	1		0	1		1	0.268542	3	0	1	0	0	1	0	0	0	0	0	4	2	0	0	0	1	0	0	1	1	1	0	0	0
NA_016_036_H	1	4	Kalokengel	2	Lominit	16	Lore Aloitanin	1	NA_016_036	2	10	2	53	2	53	0	1		0	1		1	0	1	1	1	0	0	0	0	0	0	0	0	4	2	0	0	0	1	0	0	1	1	1	0	0	0
NA_021_004_H	0	5	Nakichumet	6	Kanaura	21	Not applicable	0	NA_021_004	2	12	2	53	2	53	0	1		0	1		1	0	1	1	1	0	0	0	0	0	0	0	1	5	3	0	0	0	1	0	0	1	1	0	1	0	0
NA_017_061_H	0	4	Lomuno	4	Lopuu	17	Lore Apalomoe	1	NA_017_061	2	10	2	53	2	53	0	1		0	1		1	0	1	1	0	0	0	0	0	0	0	0	0	4	2	0	0	0	0	1	0	1	1	0	0	0	0
NA_010_097_H	0	4	Moruongor	5	Loolim	10	Not applicable	0	NA_010_097	2	11	2	52	2	52	0	2		1	2		2	0.562677	1	1	1	0	0	1	0	0	1	0	1	4	2	0	0	0	1	0	0	1	1	0	0	0	0
NA_018_056_H	0	4	Moruongor	5	Kaingolejek	18	Lore Apameri	1	NA_018_056	2	8	2	52	2	52	0	1		0	1		1	0.448054	1	1	0	0	0	1	0	0	1	0	0	4	2	0	0	0	1	0	0	0	0	0	0	0	0
NA_023_025_H	0	11	Dirtics	1	Kotipe	23	Not applicable	0	NA_023_025	2	12	2	52	2	52	0	1		0	1		1	0.835729	1	1	0	0	0	1	1	0	1	0	0	2	1	0	0	0	0	1	0	1	1	0	0	0	0
NA_023_050_H	0	11	Dirtics	1	Kotipe	23	Not applicable	0	NA_023_050	1	9	2	52	2	52	0	1		0	1		1	0.268542	3	0	1	0	0	1	0	0	0	0	0	2	1	0	0	0	0	1	0	1	1	0	0	0	0
NA_020_005_H	0	5	Lokupoi	3	Lokupoi TC -Lokitela	20	Lore Akotol	1	NA_020_005	2	11	2	30	1	52	0	1		0	1		1	0	1	1	1	0	0	0	0	0	0	0	0	4	2	0	0	0	1	0	0	0	0	0	0	0	0
NA_006_018_H	1	4	Kalokengel	2	Akwapuwa-Loluk	6	Lore Alotimong	1	NA_006_018	1	8	2	51	1	51	0	1		0	1		1	0	1	1	1	0	0	0	0	0	0	0	0	5	3	0	0	0	1	0	0	1	1	0	0	0	0
NA_010_017_H	0	4	Moruongor	5	Loolim	10	Not applicable	0	NA_010_017	2	11	2	51	2	51	0	1		0	1		1	0	1	1	1	0	0	0	0	0	0	0	1	4	2	0	0	0	1	0	0	1	1	0	0	0	0
NA_017_069_H	0	4	Lomuno	4	Lopuu	17	Lore Alokol	1	NA_017_069	2	8	2	51	2	51	0	1		0	1		1	0	1	1	1	0	0	0	0	0	0	0	0	4	2	0	0	0	1	1	0	1	1	0	0	0	0
NA_024_005_H	0	5	Nakichumet	6	Natirae A	24	Not applicable	0	NA_024_005	1	8	2	51	2	51	0	1		0	1		1	0.387676	3	0	1	0	0	0	1	0	0	0	0	5	3	0	0	0	0	1	0	1	1	0	0	0	1	Bucket
NA_025_029_H	0	5	Nakichumet	6	Natirae B	25	Not applicable	0	NA_025_029	2	13	2	51	2	51	0	1		0	1		1	1.1235	1	1	0	1	0	1	1	0	1	0	1	4	2	0	0	0	0	1	0	1	1	0	1	0	0
NA_024_010_H	0	5	Nakichumet	6	Natirae A	24	Not applicable	0	NA_024_010	2	8	2	51	2	51	0	1		0	1		1	0	1	1	1	0	0	0	0	0	0	0	1	4	2	0	0	0	0	1	0	1	1	0	0	0	0
NA_012_005_H	1	4	Kalokengel	2	Naitakwae	12	Lore Apalotom	1	NA_012_005	1	8	2	51	2	51	0	1		0	1		1	0.383165	3	0	1	0	0	1	0	0	0	0	0	4	2	0	0	0	0	1	0	1	1	0	0	0	0
NA_023_037_H	0	11	Dirtics	1	Kotipe	23	Not applicable	0	NA_023_037	1	10	1	51	2	50	0	2		1	2		2	0.452564	1	1	1	0	0	0	1	0	1	0	0	5	3	0	0	0	0	1	0	1	1	0	1	0	0
NA_007_014_H	1	4	Kalokengel	2	Angarab	7	Lore Kaabura	1	NA_007_014	1	9	2	50	2	50	0	2		1	2		2	0	1	1	1	0	0	0	0	0	0	0	0	4	2	0	0	0	0	1	0	1	1	0	0	0	0
NA_015_028_H	0	4	Moruongor	5	Naitakosowan	15	Lore Apangaari	1	NA_015_028	2	9	2	50	2	50	0	1		0	1		1	0	1	1	1	0	0	0	0	0	0	0	0	4	2	0	0	0	1	0	0	1	1	0	0	0	0
NA_022_012_H	0	5	Nakichumet	6	Atedeoi	22	Not applicable	0	NA_022_012	2	11	2	50	2	50	0	1		0	1		1	0	1	1	1	0	0	0	0	0	0	0	0	5	3	0	0	0	0	1	0	1	1	0	0	0	0
NA_022_033_H	0	5	Nakichumet	6	Atedeoi	22	Not applicable	0	NA_022_033	2	8	2	50	2	50	0	1		0	1		1	0.114623	1	1	1	0	0	0	0	0	0	0	0	5	3	0	0	0	0	1	0	1	1	0	0	0	0
NA_023_047_H	0	11	Dirtics	1	Kotipe	23	Not applicable	0	NA_023_047	1	11	2	50	2	50	0	1		0	1		1	0	1	1	1	0	0	0	0	0	0	0	0	5	3	0	0	0	0	1	0	1	1	0	1	0	0
NA_013_055_H	1	4	Lomuno	4	Nakaramwae	13	Lore Alochiyo	1	NA_013_055	2	14	2	50	2	50	0	1		0	1		1	0	1	1	0	0	0	0	0	0	0	0	0	4	2	0	0	0	0	0	1	1	1	0	0	0	0
NA_015_047_H	0	4	Moruongor	5	Naitakosowan	15	Lore Apaepela	1	NA_015_047	1	14	2	50	2	50	0	1		0	1		1	0	1	1	0	0	0	0	0	0	0	0	0	4	2	0	0	0	1	0	0	1	1	0	0	0	0
NA_015_066_H	1	4	Moruongor	5	Naitakosowan	15	Lore Apangaari	1	NA_015_066	1	14	2	50	2	50	0	1		0	1		1	0	1	1	1	0	0	0	0	0	0	0	0	4	2	0	0	0	1	0	0	1	1	0	0	0	0
NA_003_031_H	1	4	Kalokengel	2	Naregei-Nakoreete	3	Lore Kaaguma	1	NA_003_031	2	12	2	50	2	50	0	1		0	1		1	0.721107	1	1	1	0	0	1	1	0	1	0	0	4	2	0	0	0	0	1	0	1	1	0	0	0	0
NA_003_051_H	1	4	Kalokengel	2	Naregei-Nakoreete	3	Lore Apokomol	1	NA_003_051	2	11	2	50	2	50	0	1		0	1		1	0	1	1	0	0	0	0	0	0	0	0	1	4	2	0	0	0	0	1	0	1	1	0	0	0	0
NA_004_024_H	0	4	Lomuno	4	Naoyaminit	4	Lore Aporengereng	1	NA_004_024	2	12	2	50	2	50	0	1		0	1		1	0	1	1	1	0	0	0	0	0	0	0	0	4	2	0	0	0	1	0	0	1	1	0	0	0	0
NA_004_102_H	1	4	Lomuno	4	Naoyaminit	4	Lore Apalowal	1	NA_004_102	1	12	2	50	2	50	0	1		0	1		1	0	3	0	0	0	0	0	0	0	0	0	0	4	2	0	0	0	1	0	0	1	1	0	0	0	0
NA_016_023_H	1	4	Kalokengel	2	Lominit	16	Lore Achuule	1	NA_016_023	1	10	2	50	2	50	0	1		0	1		1	0	1	1	1	0	0	0	0	0	0	0	0	4	2	0	0	0	1	0	0	1	0	0	0	0	1	Watering can
NA_021_031_H	0	5	Nakichumet	6	Kanaura	21	Not applicable	0	NA_021_031	2	12	2	50	2	50	0	1		0	1		1	0.273053	2	0	1	0	0	0	1	0	0	0	0	5	3	0	0	0	1	0	0	1	1	0	0	0	0
NA_009_012_H	1	4	Nariamaregae	7	Longaroi	9	Lore Angimiroo	1	NA_009_012	1	10	2	49	2	49	0	1		0	1		1	0	3	0	1	0	0	0	0	0	0	0	0	4	2	0	0	0	1	0	0	1	1	0	0	0	0
NA_010_046_H	0	4	Moruongor	5	Loolim	10	Lore Alokoi	1	NA_010_046	2	10	2	49	2	49	0	1		0	1		1	0	3	0	0	0	0	0	0	0	0	0	0	4	2	0	0	0	1	0	0	1	1	0	0	0	0
NA_015_025_H	0	4	Moruongor	5	Naitakosowan	15	Lore Apakoela	1	NA_015_025	1	10	2	49	2	49	0	2		1	2		2	0	3	0	1	0	0	0	0	0	0	0	1	4	2	0	0	0	1	0	0	1	1	0	0	0	1	Bucket
NA_020_050_H	0	5	Lokupoi	3	Lokupoi TC -Lokitela	20	Lore Akotol	1	NA_020_050	2	10	2	49	2	49	0	4		1	4		3	0	1	1	1	0	0	0	0	0	0	0	0	4	2	0	0	0	0	1	0	0	0	0	0	0	0
NA_004_070_H	0	4	Lomuno	4	Naoyaminit	4	Lore Apalowal	1	NA_004_070	2	8	2	48	2	48	0	1		0	1		1	0	3	0	1	0	0	0	0	0	0	0	0	4	2	0	0	0	1	0	0	1	1	0	0	0	0
NA_005_009_H	1	4	Kalokengel	2	Nachuka	5	Lore Koopuwa	1	NA_005_009	1	13	2	48	2	48	0	1		0	1		1	0	1	1	1	0	0	0	0	0	0	0	0	4	2	0	0	0	0	1	0	1	1	0	0	0	0
NA_009_041_H	0	4	Nariamaregae	7	Longaroi	9	Lore Aloteng	1	NA_009_041	1	13	2	48	2	48	0	1		0	1		1	0	1	1	1	0	0	0	0	0	0	0	0	4	2	0	0	0	1	0	0	1	1	0	0	0	0
NA_010_065_H	0	4	Moruongor	5	Loolim	10	Not applicable	0	NA_010_065	2	13	2	48	2	48	0	1		0	1		1	0.368655	2	0	1	0	0	1	0	1	0	0	0	4	2	0	0	0	0	1	0	1	1	0	0	0	0
NA_014_083_H	1	4	Moruongor	5	Naoi	14	Lore Aichongat	1	NA_014_083	2	12	2	48	2	48	0	1		0	1		1	0	3	0	1	0	0	0	0	0	0	0	0	4	2	0	0	0	1	0	0	1	1	0	0	1	1	Big plastic water bottles
NA_017_049_H	1	4	Lomuno	4	Lopuu	17	Lore Alokol	1	NA_017_049	2	13	2	48	2	48	0	1		0	1		1	0	3	0	1	0	0	0	0	0	0	0	0	4	2	0	0	0	0	1	0	1	1	0	0	0	0
NA_017_058_H	0	4	Lomuno	4	Lopuu	17	Lore Apalomoe	1	NA_017_058	1	11	2	48	2	48	0	1		0	1		1	0	1	1	1	0	0	0	0	0	0	0	0	4	2	0	0	0	0	1	0	1	0	0	0	0	1	Bucket
NA_018_025_H	0	4	Moruongor	5	Kaingolejek	18	Lore Apooreng	1	NA_018_025	1	8	2	48	2	48	0	1		0	1		1	0.656218	1	1	1	0	0	1	1	0	0	0	1	4	2	0	0	0	1	0	0	1	1	0	0	0	1	Bucket
NA_024_021_H	0	5	Nakichumet	6	Natirae A	24	Not applicable	0	NA_024_021	2	12	2	48	2	48	0	1		0	1		1	0.656218	3	0	1	0	0	1	1	0	0	0	1	4	2	0	0	0	0	1	0	1	1	0	0	0	0
NA_021_018_H	0	5	Nakichumet	6	Kanaura	21	Not applicable	0	NA_021_018	2	10	1	48	2	48	0	4		1	4		3	0.835729	1	1	1	0	0	1	1	0	1	0	1	2	1	0	0	0	1	0	0	1	1	0	0	0	0
NA_014_052_H	1	4	Moruongor	5	Naoi	14	Lore Keekwaputh	1	NA_014_052	1	13	2	48	2	48	0	1		0	1		1	0	3	0	1	0	0	0	0	0	0	0	0	4	2	0	0	0	1	0	0	1	1	0	0	0	0
NA_001_021_H	1	4	Kalokengel	2	Lobei	1	Lore Kaabura	1	NA_001_021	2	12	2	48	2	48	0	1		0	1		1	0.114623	1	1	1	0	0	0	0	0	0	0	1	4	2	0	0	0	1	1	0	0	0	0	0	0	0
NA_002_062_H	0	4	Kalokengel	2	Loroo	2	Lore Kaaguma	1	NA_002_062	2	8	2	48	2	48	0	1		0	1		1	0	1	1	1	0	0	0	0	0	0	0	1	4	2	1	0	0	1	0	0	1	1	0	0	0	0
NA_003_019_H	1	4	Kalokengel	2	Naregei-Nakoreete	3	Lore Apokomol	1	NA_003_019	1	12	2	48	2	48	0	1		0	1		1	0.268542	1	1	1	0	0	1	0	0	0	0	1	4	2	0	0	0	0	1	0	1	1	0	1	0	0
NA_012_025_H	1	4	Kalokengel	2	Naitakwae	12	Lore Apalotom	1	NA_012_025	2	10	2	48	2	48	0	1		0	1		1	0.268542	3	0	1	0	0	1	0	0	0	0	0	4	2	0	0	0	0	1	0	1	1	0	0	0	0
NA_015_067_H	0	4	Moruongor	5	Naitakosowan	15	Lore Apakoela	1	NA_015_067	2	11	2	48	2	48	0	1		0	1		1	0.268542	3	0	1	0	0	1	0	0	0	0	0	4	2	0	0	0	1	0	0	1	1	0	0	0	0
NA_016_025_H	1	4	Kalokengel	2	Lominit	16	Lore Achuule	1	NA_016_025	1	10	2	48	2	48	0	1		0	1		1	0.556315	1	1	1	1	0	1	0	0	0	0	0	4	2	0	0	0	1	0	0	1	1	0	0	0	0
NA_014_064_H	0	4	Moruongor	5	Naoi	14	Lore Aichongat	1	NA_014_064	1	8	2	40	1	48	0	1		0	1		1	0	3	0	0	0	0	0	0	0	0	0	0	4	2	0	0	0	0	1	0	1	1	0	0	0	0
NA_010_064_H	0	4	Moruongor	5	Loolim	10	Lore Apalomwae	1	NA_010_064	1	14	2	39	2	48	0	4		1	4		3	1.0441	1	1	1	1	0	1	1	1	0	0	1	4	2	0	0	0	1	0	0	1	1	0	0	0	0
NA_021_008_H	0	5	Nakichumet	6	Kanaura	21	Not applicable	0	NA_021_008	2	10	1	53	2	47	0	1		0	1		1	0.829368	1	1	0	1	0	1	1	0	0	0	0	2	1	0	0	0	1	0	0	1	1	0	0	0	0
NA_011_034_H	1	4	Lomuno	4	Adwaramukuny	11	Lore Alokikiya	1	NA_011_034	2	10	2	47	2	47	0	2		1	2		2	0	1	1	1	0	0	0	0	0	0	0	0	4	2	0	0	0	1	0	0	1	1	1	0	0	0
NA_020_010_H	0	4	Lokupoi	3	Lokupoi TC -Lokitela	20	Lore Apaangakorio	1	NA_020_010	2	13	2	47	2	47	0	1		0	1		1	0	1	1	1	0	0	0	0	0	0	0	0	4	2	0	0	0	1	0	0	1	1	0	0	0	0
NA_020_026_H	0	5	Lokupoi	3	Lokupoi TC -Lokitela	20	Lore Alokai	1	NA_020_026	1	12	1	47	1	47	0	1		0	1		1	0.448054	1	1	1	0	0	1	0	0	1	0	1	4	2	0	0	0	1	0	0	1	1	0	0	0	0
NA_020_048_H	0	5	Lokupoi	3	Lokupoi TC -Lokitela	20	Lore Aloibok	1	NA_020_048	2	8	2	47	2	47	0	2		1	2		2	0	1	1	1	0	0	0	0	0	0	0	0	4	2	0	0	0	1	0	0	1	1	0	0	0	1	Bucket
NA_022_010_H	0	5	Nakichumet	6	Atedeoi	22	Not applicable	0	NA_022_010	2	12	2	47	2	47	0	1		0	1		1	0	1	1	1	0	0	0	0	0	0	0	0	5	3	0	0	0	0	1	0	0	0	0	0	0	0
NA_025_032_H	0	5	Nakichumet	6	Natirae B	25	Not applicable	0	NA_025_032	2	10	2	47	2	47	0	1		0	1		1	0.721107	1	1	0	0	0	1	1	0	1	0	0	5	3	0	0	0	0	1	0	1	1	0	0	0	0
NA_024_043_H	0	5	Nakichumet	6	Natirae A	24	Not applicable	0	NA_024_043	2	8	2	47	2	47	0	1		0	1		1	0.656218	1	1	1	0	0	1	1	0	0	0	1	5	3	0	0	0	0	1	0	1	1	0	0	0	0
NA_010_072_H	1	4	Moruongor	5	Loolim	10	Not applicable	0	NA_010_072	1	13	2	47	2	47	0	4		1	4		3	0.268542	1	1	1	0	0	1	0	0	0	0	1	4	2	0	0	0	0	1	0	1	1	0	0	0	0
NA_004_003_H	1	4	Lomuno	4	Naoyaminit	4	Lore Aporengereng	1	NA_004_003	2	9	2	47	2	47	0	1		0	4		3	0	1	1	1	0	0	0	0	0	0	0	0	4	2	0	0	0	1	0	0	1	1	0	0	0	0
NA_016_048_H	1	4	Kalokengel	2	Lominit	16	Lore Apalopale	1	NA_016_048	1	12	2	47	2	47	0	1		0	1		1	0	1	1	1	0	0	0	0	0	0	0	0	4	2	0	0	0	1	0	0	0	0	0	0	0	0
NA_015_018_H	1	4	Moruongor	5	Naitakosowan	15	Lore Apangaari	1	NA_015_018	1	10	2	37	1	47	0	6	Step father	1	6	Step child	3	0.268542	3	0	0	0	0	1	0	0	0	0	0	4	2	0	0	0	1	0	0	1	1	0	0	0	0
NA_023_004_H	0	11	Dirtics	1	Kotipe	23	Not applicable	0	NA_023_004	2	11	2	35	1	47	0	1		0	1		1	0.541595	1	1	0	0	0	1	1	0	0	0	0	2	1	0	0	0	0	1	0	1	1	0	0	0	0
NA_014_010_H	0	4	Moruongor	5	Naoi	14	Lore Keekwaputh	1	NA_014_010	1	8	1	65	2	46	1	1		0	1		1	0.268542	1	1	1	0	0	1	0	0	0	0	1	4	2	0	0	0	1	0	0	1	1	0	0	0	0
NA_015_078_ H	1	4	Moruongor	5	Naitakosowan	15	Lore Kaakol	1	NA_015_078	1	8	1	52	2	46	0	1		0	1		1	0.268542	1	1	0	0	0	1	0	0	0	0	0	4	2	0	0	0	1	0	0	1	1	0	0	0	0
NA_002_071_H	1	4	Kalokengel	2	Loroo	2	Lore Alotukei	1	NA_002_071	1	11	2	46	2	46	0	3		1	1		1	0.268542	1	1	1	0	0	1	0	0	0	0	1	4	2	0	0	0	1	0	0	1	1	0	0	0	0
NA_010_117_H	0	4	Moruongor	5	Loolim	10	Lore Apalomwae	1	NA_010_117	1	13	2	46	2	46	0	1		0	1		1	0	1	1	0	0	0	0	0	0	0	0	0	4	2	0	0	0	1	0	0	1	1	0	0	0	0
NA_006_075_H	1	4	Kalokengel	2	Akwapuwa-Loluk	6	Lore Alotimong	1	NA_006_075	1	9	2	46	2	46	0	1		0	1		1	0	1	1	1	0	0	0	0	0	0	0	0	5	3	0	0	0	1	0	0	1	1	0	0	0	0
NA_015_014_H	0	4	Moruongor	5	Naitakosowan	15	Lore Apangaari	1	NA_015_014	1	9	1	46	2	46	0	1		0	1		1	0.268542	1	1	1	0	0	1	0	0	0	0	0	4	2	0	0	0	1	0	0	0	0	0	0	0	0
NA_015_065_H	0	4	Moruongor	5	Naitakosowan	15	Lore Apakoela	1	NA_015_065	2	8	2	46	2	46	0	2		1	2		2	0	3	0	1	0	0	0	0	0	0	0	0	4	2	0	0	0	1	0	0	1	1	0	0	0	0
NA_015_023_H	1	4	Moruongor	5	Naitakosowan	15	Lore Apaepela	1	NA_015_023	1	9	1	60	2	45	0	1		0	1		1	0.273053	1	1	1	0	0	0	1	0	0	0	1	4	2	0	0	0	1	0	0	1	1	0	0	0	0
NA_002_082_H	1	4	Kalokengel	2	Loroo	2	Lore Kaalem	1	NA_002_082	2	8	2	45	2	45	0	1		0	1		1	0	1	1	1	0	0	0	0	0	0	0	1	4	2	0	0	0	1	0	0	1	1	0	0	0	0
NA_007_013_H	1	4	Kalokengel	2	Angarab	7	Lore Aloyor	1	NA_007_013	1	9	2	45	2	45	0	1		0	1		1	0.287773	1	1	1	1	0	0	0	0	0	0	1	4	2	0	0	0	0	1	0	1	1	0	0	0	0
NA_009_010_H	0	4	Nariamaregae	7	Longaroi	9	Lore Kaalbert	1	NA_009_010	1	11	2	45	2	45	0	1		0	1		1	0	3	0	1	0	0	0	0	0	0	0	0	4	2	0	0	0	1	0	0	1	1	0	0	0	0
NA_009_079_H	1	4	Nariamaregae	7	Longaroi	9	Lore Alomilimil	1	NA_009 _079	1		1	45	2	45	0	1		0	1		1	0.114623	1	1	1	0	0	0	0	0	0	0	0	4	2	0	0	0	1	0	0	0	0	0	0	0	0
NA_010_055_H	0	4	Moruongor	5	Loolim	10	Lore Apalomwae	1	NA_010_055	2	10	2	45	2	45	0	1		0	1		1	0.268542	1	1	1	0	0	1	0	0	0	0	1	4	2	0	0	0	1	0	0	1	1	0	0	0	0
NA_021_073_H	0	5	Nakichumet	6	Kanaura	21	Not applicable	0	NA_021_073	2	9	2	45	2	45	0	1		0	1		1	0	1	1	0	0	0	0	0	0	0	0	1	4	2	0	0	0	1	1	0	1	1	0	0	0	1	Bucket
NA_023_042_H	0	11	Dirtics	1	Kotipe	23	Not applicable	0	NA_023_042	2	11	2	45	2	45	0	1		0	1		1	0	1	1	1	0	0	0	0	0	0	0	0	2	1	0	0	0	0	1	0	1	1	0	0	0	0
NA_024_026_H	0	5	Nakichumet	6	Natirae A	24	Not applicable	0	NA_024_026	2	8	2	45	2	45	0	1		0	1		1	0.387676	1	1	1	0	0	0	1	0	0	0	1	5	3	0	0	0	0	1	0	1	1	0	0	0	0
NA_017_038_H	1	4	Lomuno	4	Lopuu	17	Lore Lokiteded	1	NA_017_038	1	9	2	45	2	45	0	1		0	1		1	0.268542	1	1	1	0	0	1	0	0	0	0	0	1	1	0	0	0	1	0	0	1	1	1	0	0	0
NA_024_014_H	0	5	Nakichumet	6	Natirae A	24	Not applicable	0	NA_024_014	2	8	2	45	2	45	0	1		0	1		1	0	1	1	0	0	0	0	0	0	0	0	0	4	2	0	0	0	0	1	0	1	1	0	0	0	1	Bucket
NA_012_011_H	1	4	Kalokengel	2	Naitakwae	12	Lore Apalotom	1	NA_012_011	1	9	2	45	2	45	0	1		0	1		1	0	3	0	1	0	0	0	0	0	0	0	0	4	2	0	0	0	0	1	0	1	0	0	0	0	1	Watering can
NA_004_032_H	1	4	Lomuno	4	Naoyaminit	4	Lore Alouro	1	NA_004_032	2	10	2	45	2	45	0	1		0	1		1	0	1	1	0	0	0	0	0	0	0	0	0	4	2	0	0	0	1	0	0	1	1	0	0	0	0
NA_004_077_H	1	4	Lomuno	4	Naoyaminit	4	Lore Apalowal	1	NA_004_077	2	10	2	45	2	45	0	1		0	1		1	0	3	0	1	0	0	0	0	0	0	0	0	4	2	0	0	0	1	0	0	1	1	0	0	0	0
NA_017_052_H	1	4	Lomuno	4	Lopuu	17	Lore Apalomoe	1	NA_017_052	2	8	2	45	2	45	0	1		0	1		1	0	1	1	1	0	0	0	0	0	0	0	0	4	2	0	0	0	0	1	0	0	0	0	0	0	0
NA_017_057_H	0	4	Lomuno	4	Lopuu	17	Lore Apalomoe	1	NA_017_057	2	10	2	45	2	45	0	1		0	1		1	0	1	1	1	0	0	0	0	0	0	0	0	4	2	0	0	0	1	0	0	0	0	0	0	0	0
NA_018_001_H	0	4	Moruongor	5	Kaingolejek	18	Lore Apomomwo	1	NA_018_001	1	10	1	50	2	44	0	1		0	1		1	0	1	1	1	0	0	0	0	0	0	0	0	5	3	0	0	0	1	1	0	1	1	0	0	0	0
NA_010_080_H	0	4	Moruongor	5	Loolim	10	Not applicable	0	NA_010_080	2	12	2	44	2	44	0	1		0	1		1	0	1	1	0	0	0	0	0	0	0	0	0	4	2	0	0	0	1	0	0	1	1	0	0	0	0
NA_014_077_H	1	4	Moruongor	5	Naoi	14	Lore Keekwaputh	1	NA_014_077	2	14	2	44	2	44	0	1		0	1		1	0	1	1	0	0	0	0	0	0	0	0	0	4	2	0	0	0	1	0	0	1	1	0	0	0	0
NA_010_023_H	0	4	Moruongor	5	Loolim	10	Not applicable	0	NA_010_023	1	14	2	44	2	44	0	1		0	1		1	0	3	0	1	0	0	0	0	0	0	0	0	4	2	0	0	0	1	0	0	1	1	0	0	0	0
NA_023_014_H	0	11	Dirtics	1	Kotipe	23	Not applicable	0	NA_023_014	1	12	2	44	2	44	0	1		0	1		1	0	3	0	0	0	0	0	0	0	0	0	0	2	1	0	0	0	0	1	0	1	1	0	0	0	0
NA_002_080_H	1	4	Kalokengel	2	Loroo	2	Lore Kaalem	1	NA_002_080	1	10	1	45	2	43	0	1		0	1		1	0.383165	1	1	1	0	0	1	0	0	0	0	1	4	2	0	0	0	1	0	0	1	1	0	0	0	0
NA_008_061_H	0	4	Moruongor	5	Naronit	8	Lore Abule	1	NA_008_061	1	13	2	43	2	43	0	1		0	1		1	0.268542	1	1	1	0	0	1	0	0	0	0	0	4	2	0	0	0	1	0	0	1	1	0	0	0	0
NA_010_073_H	0	4	Moruongor	5	Loolim	10	Not applicable	0	NA_010_073	1	11	2	43	2	43	0	1		0	1		1	0.114623	1	1	1	0	0	0	0	0	0	0	1	4	2	0	0	0	1	0	0	1	1	0	0	0	0
NA_014_063_H	1	4	Moruongor	5	Naoi	14	Lore Keekwaputh	1	NA_014_063	1	9	2	43	2	43	0	1		0	1		1	0	3	0	1	0	0	0	0	0	0	0	0	4	2	0	0	0	1	0	0	1	1	0	0	0	0
NA_015_059_H	0	4	Moruongor	5	Naitakosowan	15	Lore Apangaari	1	NA_015_059	1	14	2	43	2	43	0	1		0	1		1	0	3	0	1	0	0	0	0	0	0	0	1	4	2	0	0	0	1	0	0	1	1	0	0	0	0
NA_017_002_H	0	4	Lomuno	4	Lopuu	17	Lore Lokiteded	1	NA_017_002	1	12	2	43	2	43	0	1		0	1		1	0.448054	1	1	0	0	0	1	0	0	1	0	0	4	2	0	0	0	1	0	0	1	1	0	0	0	0
NA_022_034_H	0	5	Nakichumet	6	Atedeoi	22	Not applicable	0	NA_022_034	2	8	2	43	2	43	0	1		0	1		1	0	3	0	0	0	0	0	0	0	0	0	0	5	3	0	0	0	0	1	0	1	1	0	0	0	0
NA_022_048_H	0	5	Nakichumet	6	Atedeoi	22	Not applicable	0	NA_022_048	1	10	2	43	2	43	0	1		0	1		1	0	1	1	0	0	0	0	0	0	0	0	0	5	3	0	0	0	0	1	0	1	1	0	0	0	0
NA_023_006_H	0	11	Dirtics	1	Kotipe	23	Not applicable	0	NA_023_006	2	8	2	43	2	43	0	1		0	1		1	0.835939	3	0	1	1	0	1	0	1	1	0	1	2	1	0	0	0	0	1	0	1	1	1	0	0	0
NA_024_023_H	0	5	Nakichumet	6	Natirae A	24	Not applicable	0	NA_024_023	2	8	2	43	2	43	0	1		0	1		1	0.268542	1	1	1	0	0	1	0	0	0	0	0	5	3	0	0	0	0	1	0	1	1	0	0	0	0
NA_005_024_H	0	4	Kalokengel	2	Nachuka	5	Lore Alotee	1	NA_005_024	1	8	2	43	2	43	0	1		0	1		1	0	1	1	1	0	0	0	0	0	0	0	0	4	2	0	0	0	0	1	0	1	1	0	0	0	0
NA_023_062_H	0	11	Dirtics	1	Kotipe	23	Not applicable	0	NA_023_062	2	8	2	43	2	43	0	1		0	1		1	1.10899	1	1	0	1	0	1	1	1	1	0	0	2	1	0	0	0	0	1	0	1	1	0	0	0	0
NA_024_030_H	0	5	Nakichumet	6	Natirae A	24	Not applicable	0	NA_024_030	2	10	2	43	2	43	0	1		0	1		1	0.273053	1	1	0	0	0	0	1	0	0	0	1	4	2	0	0	0	0	1	0	1	1	0	0	0	1	Bucket
NA_003_110_H	1	4	Kalokengel	2	Naregei-Nakoreete	3	Lore Apokomol	1	NA_003_110	2	14	2	43	2	43	0	1		0	1		1	0	1	1	1	0	0	0	0	0	0	0	0	4	2	0	0	0	0	1	0	1	1	0	0	0	0
NA_004_005_H	0	4	Lomuno	4	Naoyaminit	4	Lore Keebutur	1	NA_004_005	2	8	1	46	2	42	0	6	Step mother	1	1		1	0	1	1	1	0	0	0	0	0	0	0	0	4	2	0	0	0	1	0	0	1	1	0	0	0	0
NA_023_064_H	0	11	Dirtics	1	Kotipe	23	Not applicable	0	NA_023_064	1	10	2	43	2	42	0	1		0	1		1	0.273053	3	0	1	0	0	0	1	0	0	0	0	5	3	0	0	0	0	1	0	1	1	0	0	0	0
NA_009_040_H	0	4	Nariamaregae	7	Longaroi	9	Lore Angimiroo	1	NA_009_040	2	13	2	42	2	42	0	1		0	1		1	0.268542	1	1	0	0	0	1	0	0	0	0	1	4	2	0	0	0	1	0	0	1	1	0	0	0	0
NA_009_069_H	1	4	Nariamaregae	7	Longaroi	9	Lore Kanyangareng	1	NA_009_069	1	9	2	42	2	42	0	1		0	1		1	0	1	1	0	0	0	0	0	0	0	0	0	4	2	0	0	0	1	0	0	1	1	0	0	0	0
NA_010_056_H	1	4	Moruongor	5	Loolim	10	Not applicable	0	NA_010_056	2	12	2	42	2	42	0	1		0	1		1	0	3	0	1	0	0	0	0	0	0	0	1	4	2	0	0	0	1	0	0	1	1	0	0	0	0
NA_013_073_H	1	4	Lomuno	4	Nakaramwae	13	Lore Amerinyang	1	NA_013_073	2	10	2	42	2	42	0	1		0	1		1	0.114623	1	1	0	0	0	0	0	0	0	0	0	4	2	0	0	0	0	1	0	1	1	0	0	0	0
NA_020_029_H	0	5	Lokupoi	3	Lokupoi TC -Lokitela	20	Lore Apaangakorio	1	NA_020_029	2	10	2	42	2	42	0	1		0	1		1	0.268542	1	1	1	0	0	1	0	0	0	0	1	4	2	0	0	0	1	0	0	1	1	0	0	1	0
NA_020_033_H	0	5	Lokupoi	3	Lokupoi TC -Lokitela	20	Lore Akotol	1	NA_020_033	1	8	2	42	2	42	0	1		0	1		1	0.448054	1	1	1	0	1	1	0	0	1	0	1	4	2	0	0	0	1	0	0	1	1	0	0	0	1	Bucket
NA_022_038_H	0	5	Nakichumet	6	Atedeoi	22	Not applicable	0	NA_022_038	1	12	2	42	2	42	0	1		0	1		1	0	1	1	1	0	0	0	0	0	0	0	0	5	3	0	0	0	0	1	0	1	1	0	0	0	0
NA_005_053_H	1	4	Kalokengel	2	Nachuka	5	Lore Kaapuun	1	NA_005_053	2	14	2	42	2	42	0	1		0	1		1	0	1	1	1	0	0	0	0	0	0	0	1	4	2	0	0	0	0	1	0	1	1	0	0	0	0
NA_001_019_H	1	4	Kalokengel	2	Lobei	1	Lore Kaabura	1	NA_001_019	2	8	2	42	2	42	0	1		0	1		1	0	1	1	1	0	0	0	0	0	0	0	0	4	2	0	0	0	1	1	0	0	0	0	0	0	0
NA_008_050_H	1	4	Moruongor	5	Naronit	8	Lore Akodet	1	NA_008_050	1	10	2	42	2	42	0	1		0	1		1	0	3	0	0	0	0	0	0	0	0	0	0	4	2	0	0	0	1	0	0	1	1	0	0	0	0
NA_014_062_H	0	4	Moruongor	5	Naoi	14	Lore Keekwaputh	1	NA_014_062	1	9	2	42	2	42	0	1		0	1		1	0	3	0	1	0	0	0	0	0	0	0	0	4	2	0	0	0	1	0	0	1	1	1	0	0	0
NA_024_042_H	0	5	Nakichumet	6	Natirae A	24	Not applicable	0	NA_024_042	2	8	2	42	2	42	0	1		0	1		1	0	1	1	0	0	0	0	0	0	0	0	0	5	3	0	0	0	0	1	0	1	1	0	1	0	1	Bucket
NA_005_042_H	1	4	Kalokengel	2	Nachuka	5	Lore Alotee	1	NA_005_042	1	8	2	41	2	41	0	1		0	1		1	0	1	1	0	0	0	0	0	0	0	0	0	4	2	0	0	0	0	1	0	1	1	0	0	0	0
NA_006_011_H	0	4	Kalokengel	2	Akwapuwa-Loluk	6	Lore Alotimong	1	NA_006_011	1	14	2	41	2	41	0	1		0	1		1	0	1	1	1	0	0	0	0	0	0	0	0	5	3	0	0	0	1	0	0	1	1	0	0	0	0
NA_015_037_H	1	4	Moruongor	5	Naitakosowan	15	Lore Apangaari	1	NA_015_037	1	9	2	41	2	41	0	1		0	1		1	0	1	1	1	0	0	0	0	0	0	0	0	4	2	0	0	0	1	0	0	1	1	0	0	0	0
NA_006_024_H	1	4	Kalokengel	2	Akwapuwa-Loluk	6	Lore Apakarengit	1	NA_006_024	2	10	2	41	2	41	0	1		0	1		1	0.268542	1	1	1	0	0	1	0	0	0	0	1	4	2	0	0	0	1	0	0	1	1	0	0	0	0
NA_009_029_H	0	4	Nariamaregae	7	Longaroi	9	Lore Angimiroo	1	NA_009_029	2	8	2	41	2	41	0	1		0	1		1	0	3	0	1	0	0	0	0	0	0	0	0	4	2	0	0	0	1	0	0	1	1	0	0	0	0
NA_017_026_H	0	4	Lomuno	4	Lopuu	17	Lore Alokol	1	NA_017_026	2	8	2	41	2	41	0	1		0	1		1	0.268542	1	1	1	0	0	1	0	0	0	0	0	4	2	0	0	0	0	1	0	1	1	0	0	0	0
NA_002_048_H	1	4	Kalokengel	2	Loroo	2	Lore Aichumar	1	NA_002_048	2	10	2	41	2	41	0	1		0	1		1	0	1	1	0	0	0	0	0	0	0	0	0	4	2	1	0	0	0	1	0	1	1	0	0	0	0
NA_007_006_H	1	4	Kalokengel	2	Angarab	7	Lore Aloyor	1	NA_007_006	1	8	2	40	2	40	0	1		0	1		1	0	1	1	1	0	0	0	0	0	0	0	1	4	2	0	0	0	0	1	0	1	1	0	0	0	0
NA_008_039_H	1	4	Moruongor	5	Naronit	8	Lore Ateko	1	NA_008_039	2	8	2	40	2	40	0	1		0	2		2	0.268542	3	0	1	0	0	1	0	0	0	0	1	4	2	0	0	0	1	0	0	1	1	0	0	0	0
NA_009_031_H	1	4	Nariamaregae	7	Longaroi	9	Lore Angimiroo	1	NA_009_031	2	10	2	40	2	40	0	1		0	1		1	0.114623	1	1	1	0	0	0	0	0	0	0	0	4	2	0	0	0	1	1	0	1	1	1	0	0	0
NA_010_052_H	0	4	Moruongor	5	Loolim	10	Not applicable	0	NA_010_052	2	11	2	40	2	40	0	1		0	1		1	0	3	0	1	0	0	0	0	0	0	0	1	8		0	0	0	1	0	0	1	1	0	0	0	0
NA_011_005_H	0	4	Lomuno	4	Adwaramukuny	11	Lore Angikatap	1	NA_011_005	2	8	2	40	2	40	0	1		0	1		1	0	1	1	1	0	0	0	0	0	0	0	1	4	2	0	0	0	1	0	0	1	1	1	0	0	0
NA_012_019_H	0	4	Kalokengel	2	Naitakwae	12	Lore Apalotuko	1	NA_012_019	2	14	2	40	2	40	0	1		0	1		1	0.721107	1	1	0	0	0	1	1	0	1	0	1	4	2	0	0	0	0	1	0	1	1	0	0	0	0
NA_012_021_H	1	4	Kalokengel	2	Naitakwae	12	Lore Apalotuko	1	NA_012_021	2	10	2	40	2	40	0	1		0	1		1	0	1	1	1	0	0	0	0	0	0	0	0	4	2	0	0	0	0	1	0	1	1	0	0	0	0
NA_014_032_H	0	4	Moruongor	5	Naoi	14	Lore Keekwaputh	1	NA_014_032	2	8	2	40	2	40	0	1		0	1		1	0.268542	3	0	1	0	0	1	0	0	0	0	0	4	2	0	0	0	1	0	0	1	1	0	0	0	0
NA_018_034_H	0	4	Moruongor	5	Kaingolejek	18	Lore Apooreng	1	NA_018_034	2	10	2	40	2	40	0	1		0	1		1	0.179511	1	1	1	0	0	0	0	0	1	0	0	4	2	0	0	0	1	0	0	0	0	0	0	0	0
NA_021_075_H	0	5	Nakichumet	6	Kanaura	21	Not applicable	0	NA_021_075	2	8	2	40	2	40	0	1		0	1		1	0	2	0	1	0	0	0	0	0	0	0	0	5	3	0	0	0	0	1	0	1	1	0	0	0	0
NA_023_026_H	0	11	Dirtics	1	Kotipe	23	Not applicable	0	NA_023_026	2	9	2	40	2	40	0	1		0	1		1	0.943991	1	1	1	1	0	1	1	0	0	0	1	5	3	0	0	0	0	1	0	1	1	0	1	0	0
NA_023_039_H	0	11	Dirtics	1	Kotipe	23	Not applicable	0	NA_023_039	1	10	2	40	2	40	0	1		0	1		1	0.273053	1	1	0	0	0	0	1	0	0	0	1	5	3	0	0	0	0	1	0	1	1	0	1	0	0
NA_025_006_H	0	5	Nakichumet	6	Natirae B	25	Not applicable	0	NA_025_006	1	10	2	40	2	40	0	1		0	1		1	0.656218	1	1	0	0	0	1	1	0	0	0	0	5	3	0	0	0	0	1	0	1	1	0	0	0	0
NA_025_031_H	0	5	Nakichumet	6	Natirae B	25	Not applicable	0	NA_025_031	2	12	2	40	2	40	0	1		0	1		1	0.656218	1	1	0	0	0	1	1	0	0	0	1	5	3	0	0	0	0	1	0	1	1	0	1	0	1	Bucket
NA_025_025_H	0	5	Nakichumet	6	Natirae B	25	Not applicable	0	NA_025_025	2	9	2	40	2	40	0	1		0	1		1	0.114623	3	0	1	0	0	0	0	0	0	0	1	4	2	0	0	0	0	1	0	1	1	0	0	0	0
NA_010_114_H	1	4	Moruongor	5	Loolim	10	Not applicable	0	NA_010_114	1	10	2	40	2	40	0	1		0	1		1	0	3	0	1	0	0	0	0	0	0	0	0	4	2	0	0	0	1	0	0	1	1	0	0	0	0
NA_012_017_H	0	4	Kalokengel	2	Naitakwae	12	Lore Apalotuko	1	NA_012_017	2	14	2	40	2	40	0	1		0	1		1	0.383165	1	1	1	0	0	1	0	0	0	0	1	4	2	0	0	0	0	1	0	1	1	0	0	0	0
NA_013_060_H	1	4	Lomuno	4	Nakaramwae	13	Lore Alochiyo	1	NA_013_060	2	10	2	40	2	40	0	1		0	1		1	0	1	1	0	0	0	0	0	0	0	0	0	4	2	0	0	0	0	1	0	1	1	0	0	0	0
NA_015_029_H	1	4	Moruongor	5	Naitakosowan	15	Lore Apakoela	1	NA_015_029	1	8	2	40	2	40	0	1		0	1		1	0	1	1	0	0	0	0	0	0	0	0	0	4	2	0	0	0	1	0	0	1	1	0	0	0	0
NA_016_024_H	1	4	Kalokengel	2	Lominit	16	Lore Apalopale	1	NA_016_024	2	13	2	40	2	40	0	1		0	1		1	0.667299	1	1	1	0	0	0	1	1	1	0	0	4	2	0	0	0	1	0	0	0	0	0	0	0	0
NA_016_062_H	0	4	Kalokengel	2	Lominit	16	Lore Apalopale	1	NA_016_062	2	8	2	40	2	40	0	1		0	1		1	0	1	1	0	0	0	0	0	0	0	0	1	4	2	0	0	0	1	0	0	0	0	0	0	0	0
NA_008_057_H	0	4	Moruongor	5	Naronit	8	Lore Ateko	1	NA_008_057	2	9	2	20	2	40	0	2		1	3		3	0	2	0	1	0	0	0	0	0	0	0	1	4	2	0	0	0	1	0	0	1	1	0	0	0	0
NA_008_013_H	0	4	Moruongor	5	Naronit	8	Lore Abule	1	NA_008_013	1	13	2	39	2	39	0	1		0	1		1	0	1	1	1	0	0	0	0	0	0	0	1	4	2	0	0	0	1	0	0	1	1	0	0	0	0
NA_009_071_H	1	4	Nariamaregae	7	Longaroi	9	Lore Kaamunyinakori	1	NA_009_071	1	10	2	39	2	39	0	1		0	1		1	0	3	0	1	0	0	0	0	0	0	0	0	5	3	0	0	0	1	0	0	1	1	0	0	0	0
NA_015_010_H	0	4	Moruongor	5	Naitakosowan	15	Lore Apakoela	1	NA_015_010	1	8	2	39	2	39	0	1		0	1		1	0.273053	3	0	1	0	0	0	1	0	0	0	1	4	2	0	0	0	1	0	0	1	0	0	0	0	1	Bucket
NA_022_014_H	0	5	Nakichumet	6	Atedeoi	22	Not applicable	0	NA_022_014	2	10	2	39	2	39	0	1		0	1		1	0.114623	1	1	1	0	0	0	0	0	0	0	0	5	3	0	0	0	0	1	0	1	1	0	0	0	0
NA_023_028_H	0	11	Dirtics	1	Kotipe	23	Not applicable	0	NA_023_028	2	13	2	39	2	39	0	1		0	1		1	0.268542	1	1	1	0	0	1	0	0	0	0	0	5	3	0	0	0	0	1	0	1	1	0	0	0	1	Bucket
NA_022_042_H	0	5	Nakichumet	6	Atedeoi	22	Not applicable	0	NA_022_042	1	14	2	39	2	39	0	1		0	1		1	0	1	1	1	0	0	0	0	0	0	0	0	5	3	0	0	0	0	1	0	0	0	0	0	0	0
NA_013_045_H	1	4	Lomuno	4	Nakaramwae	13	Lore Angoriaale	1	NA_013_045	1	10	2	39	2	39	0	1		0	1		1	0.562677	1	1	1	0	0	1	0	0	1	0	1	4	2	0	0	0	0	1	0	1	1	0	1	0	0
NA_010_095_H	1	4	Moruongor	5	Loolim	10	Not applicable	0	NA_010_095	2	12	2	99	2	38	1	4		1	2		2	0	1	1	1	0	0	0	0	0	0	0	0	4	2	0	0	0	1	0	0	1	1	0	0	0	0
NA_003_003_H	1	4	Kalokengel	2	Naregei-Nakoreete	3	Lore Apokomol	1	NA_003_003	1	10	2	90	2	38	1	1		0	2		2	0	1	1	1	0	0	0	0	0	0	0	0	4	2	0	0	0	0	1	0	1	1	0	0	0	0
NA_023_036_H	0	11	Dirtics	1	Kotipe	23	Not applicable	0	NA_023_036	1	8	1	76	2	38	1	1		0	1		1	0.541595	1	1	1	0	0	1	1	0	0	0	1	5	3	0	0	0	0	1	0	1	0	0	1	0	0
NA_001_010_H	1	4	Kalokengel	2	Lobei	1	Lore Nakaao	1	NA_001_010	1	9	1	60	2	38	0	1		0	1		1	0.114623	1	1	0	0	0	0	0	0	0	0	0	4	2	0	0	0	1	1	0	0	0	0	0	0	0
NA_023_033_H	0	11	Dirtics	1	Kotipe	23	Not applicable	0	NA_023_033	2	14	2	46	2	38	0	1		0	1		1	0.656218	3	0	1	0	0	1	1	0	0	0	1	2	1	0	0	0	0	1	0	1	1	0	0	0	0
NA_005_016_H	1	4	Kalokengel	2	Nachuka	5	Lore Koopuwa	1	NA_005_016	2	10	2	38	2	38	0	4		1	4		3	0.268542	1	1	0	0	0	1	0	0	0	0	0	4	2	0	0	0	0	1	0	1	1	0	0	0	0
NA_009_035_H	1	4	Nariamaregae	7	Longaroi	9	Lore Kaachuka	1	NA_009_035	2	9	2	38	2	38	0	1		0	1		1	0	3	0	0	0	0	0	0	0	0	0	1	4	2	0	0	0	1	0	0	1	1	0	0	0	0
NA_013_080_H	1	4	Lomuno	4	Nakaramwae	13	Lore Amerinyang	1	NA_013_080	1	8	2	38	2	38	0	1		0	1		1	0	3	0	0	0	0	0	0	0	0	0	0	4	2	0	0	0	0	1	0	1	1	0	0	0	0
NA_021_040_H	0	5	Nakichumet	6	Kanaura	21	Not applicable	0	NA_021_040	2	8	2	38	2	38	0	1		0	1		1	0	1	1	0	0	0	0	0	0	0	0	0	5	3	0	0	0	1	0	0	1	1	0	0	0	0
NA_023_034_H	0	11	Dirtics	1	Kotipe	23	Not applicable	0	NA_023_034	2	12	2	38	2	38	0	1		0	1		1	0.541595	1	1	0	0	0	1	1	0	0	0	0	5	3	0	0	0	0	1	0	1	1	0	0	0	0
NA_024_044_H	0	5	Nakichumet	6	Natirae A	24	Not applicable	0	NA_024_044	2	8	2	38	2	38	0	1		0	1		1	0.829368	1	1	0	1	0	1	1	0	0	0	0	5	3	0	0	0	0	1	0	1	1	0	0	0	0
NA_003_032_H	1	4	Kalokengel	2	Naregei-Nakoreete	3	Lore Apokomol	1	NA_003_032	1	9	2	38	2	38	0	1		0	1		1	0.268542	3	0	1	0	0	1	0	0	0	0	1	4	2	0	0	0	0	1	0	1	1	0	0	0	0
NA_006_047_H	1	4	Kalokengel	2	Akwapuwa-Loluk	6	Lore Adengel	1	NA_006_047	2	12	2	38	2	38	0	1		0	1		1	0	3	0	0	0	0	0	0	0	0	0	0	5	3	0	0	0	0	1	0	1	1	0	0	0	0
NA_012_010_H	1	4	Kalokengel	2	Naitakwae	12	Lore Apalotom	1	NA_012_010	2	10	2	38	2	38	0	1		0	1		1	0	1	1	0	0	0	0	0	0	0	0	0	4	2	0	0	0	0	1	0	1	1	0	0	0	1	Watering can
NA_014_040_H	1	4	Moruongor	5	Naoi	14	Lore Aichongat	1	NA_014_040	2	10	2	38	2	38	0	1		0	1		1	0.556315	1	1	1	1	0	1	0	0	0	0	0	4	2	0	0	0	1	0	0	1	1	0	0	0	0
NA_015_056_H	0	4	Moruongor	5	Naitakosowan	15	Lore Apakoela	1	NA_015_056	2	8	2	38	2	38	0	1		0	1		1	0	1	1	0	0	0	0	0	0	0	0	0	4	2	0	0	0	1	0	0	1	1	0	0	0	0
NA_015_072_H	1	4	Moruongor	5	Naitakosowan	15	Lore Apaepela	1	NA_015_072	2	9	2	38	2	38	0	1		0	1		1	0	1	1	0	0	0	0	0	0	0	0	0	4	2	0	0	0	1	0	0	1	1	0	0	0	0
NA_006_051_H	1	4	Kalokengel	2	Akwapuwa-Loluk	6	Lore Apakarengit	1	NA_006_051	2	9	2	37	2	37	0	1		0	1		1	0.448054	1	1	1	0	0	1	0	0	1	0	0	4	2	0	0	0	1	0	0	1	1	0	0	0	0
NA_008_037_H	1	4	Moruongor	5	Naronit	8	Lore Amaide	1	NA_008_037	1	8	2	37	2	37	0	1		0	1		1	0.268542	3	0	1	0	0	1	0	0	0	0	1	4	2	0	0	0	1	0	0	1	1	0	0	0	0
NA_008_044_H	0	4	Moruongor	5	Naronit	8	Lore Ateko	1	NA_008_044	1	12	2	37	2	37	0	1		0	1		1	0.114623	1	1	0	0	0	0	0	0	0	0	1	4	2	0	0	0	1	0	0	1	1	0	0	0	0
NA_015_049_H	0	4	Moruongor	5	Naitakosowan	15	Lore Apakoela	1	NA_015_049	1	9	2	37	2	37	0	1		0	1		1	0	3	0	0	0	0	0	0	0	0	0	0	4	2	0	0	0	1	0	0	1	1	0	0	0	0
NA_015_063_H	0	4	Moruongor	5	Naitakosowan	15	Lore Apangaari	1	NA_015_063	2	8	2	37	2	37	0	1		0	1		1	0	3	0	1	0	0	0	0	0	0	0	0	4	2	0	0	0	1	0	0	1	1	0	0	0	0
NA_017_029_H	0	4	Lomuno	4	Lopuu	17	Lore Lokiteded	1	NA_017_029	2	10	2	37	2	37	0	1		0	1		1	0.179511	1	1	1	0	0	0	0	0	1	0	0	4	2	0	0	0	1	0	0	0	0	0	0	0	0
NA_022_023_H	0	5	Nakichumet	6	Atedeoi	22	Not applicable	0	NA_022_023	1	10	2	37	2	37	0	1		0	1		1	0.735827	1	1	1	1	0	1	0	0	1	0	0	4	2	0	1	0	0	1	0	1	1	0	0	0	0
NA_022_031_H	0	5	Nakichumet	6	Atedeoi	22	Not applicable	0	NA_022_031	1	12	2	37	2	37	0	1		0	1		1	0	1	1	0	0	0	0	0	0	0	0	0	5	3	1	1	0	0	1	0	1	1	0	0	0	0
NA_024_020_H	0	5	Nakichumet	6	Natirae A	24	Not applicable	0	NA_024_020	1	8	2	37	2	37	0	1		0	1		1	0.273053	3	0	0	0	0	0	1	0	0	0	1	5	3	0	0	0	0	1	0	1	1	0	0	0	0
NA_025_019_H	0	5	Nakichumet	6	Natirae B	25	Not applicable	0	NA_025_019	2	10	2	37	2	37	0	1		0	1		1	1.1235	1	1	1	1	0	1	1	0	1	0	0	4	2	0	0	0	0	1	0	1	1	0	0	0	0
NA_024_007_H	0	5	Nakichumet	6	Natirae A	24	Not applicable	0	NA_024_007	2	9	2	37	2	37	0	1		0	1		1	0.268542	3	0	1	0	0	1	0	0	0	0	0	4	2	0	0	0	0	1	0	1	1	0	0	0	0
NA_012_012_H	1	4	Kalokengel	2	Naitakwae	12	Lore Apalotom	1	NA_012_012	2	9	2	37	2	37	0	1		0	1		1	0.114623	1	1	1	0	0	0	0	0	0	0	0	4	2	0	0	0	0	1	0	1	1	0	0	0	0
NA_013_082_H	1	4	Lomuno	4	Nakaramwae	13	Lore Alochiyo	1	NA_013_082	1	8	2	37	2	37	0	1		0	1		1	0	1	1	1	0	0	0	0	0	0	0	0	4	2	0	0	0	0	1	0	1	1	0	0	0	0
NA_018_011_H	0	4	Moruongor	5	Kaingolejek	18	Lore Apomomwo	1	NA_018_011	1	8	2	37	2	37	0	1		0	1		1	0	1	1	1	0	0	0	0	0	0	0	0	5	3	0	0	0	1	0	0	0	0	0	0	0	0
NA_020_068_H	0	5	Lokupoi	3	Lokupoi TC -Lokitela	20	Lore Apaangakorio	1	NA_020_068	2	13	2	37	2	37	0	1		0	1		1	0	3	0	1	0	0	0	0	0	0	0	0	4	2	0	0	0	1	0	0	0	0	0	0	0	0
NA_024_029_H	0	5	Nakichumet	6	Natirae A	24	Not applicable	0	NA_024_029	1	8	2	37	2	37	0	1		0	1		1	0.114623	1	1	0	0	0	0	0	0	0	0	1	4	2	0	0	0	0	1	0	1	1	0	0	0	0
NA_023_022_H	0	11	Dirtics	1	Kotipe	23	Not applicable	0	NA_023_022	2	12	1	42	2	36	0	1		0	1		1	0.273053	1	1	1	0	0	0	1	0	0	0	0	2	1	0	0	0	0	1	0	1	1	0	0	0	0
NA_001_033_H	1	4	Kalokengel	2	Lobei	1	Lore Kaabura	1	NA_001_033	1	10	1	42	2	36	0	1		0	1		1	0.114623	1	1	1	0	0	0	0	0	0	0	0	4	2	0	0	0	1	1	0	1	1	0	0	0	0
NA_004_010_H	0	4	Lomuno	4	Naoyaminit	4	Lore Aporengereng	1	NA_004_010	1	13	2	36	2	36	0	1		0	1		1	0	2	0	1	0	0	0	0	0	0	0	0	4	2	0	0	0	1	0	0	1	1	0	0	0	0
NA_004_067_H	1	4	Lomuno	4	Naoyaminit	4	Lore Apalowal	1	NA_004_067	1	11	2	36	2	36	0	1		0	1		1	0.268542	1	1	0	0	0	1	0	0	0	0	1	4	2	0	0	0	1	0	0	1	1	0	0	0	0
NA_010_035_H	0	4	Moruongor	5	Loolim	10	Not applicable	0	NA_010_035	2	8	2	36	2	36	0	1		0	1		1	0.268542	1	1	1	0	0	1	0	0	0	0	0	4	2	0	0	0	1	0	0	1	1	0	0	0	0
NA_011_013_H	0	4	Lomuno	4	Adwaramukuny	11	Lore Angikatap	1	NA_011_013	2	8	2	36	2	36	0	1		0	1		1	0.268542	1	1	1	0	0	1	0	0	0	0	0	4	2	0	0	0	1	0	0	1	1	0	0	0	0
NA_016_061_H	0	4	Kalokengel	2	Lominit	16	Lore Achuule	1	NA_016_061	2	8	2	36	2	36	0	1		0	1		1	0	1	1	0	0	0	0	0	0	0	0	0	4	2	0	0	0	1	0	0	1	1	0	0	0	0
NA_018_038_H	0	4	Moruongor	5	Kaingolejek	18	Lore Apomomwo	1	NA_018_038	2	9	2	36	2	36	0	1		0	1		1	0	1	1	0	0	0	0	0	0	0	0	0	5	3	0	0	0	1	0	0	1	1	0	0	0	0
NA_020_054_H	0	5	Lokupoi	3	Lokupoi TC -Lokitela	20	Lore Akotol	1	NA_020_054	2	10	1	36	1	36	0	1		0	1		1	0	1	1	1	0	0	0	0	0	0	0	0	4	2	0	0	0	0	1	0	0	0	0	0	0	0
NA_024_001_H	0	5	Nakichumet	6	Natirae A	24	Not applicable	0	NA_024_001	1	12	2	36	2	36	0	1		0	1		1	1.00888	1	1	0	1	0	1	1	0	1	0	1	4	2	0	0	0	0	1	0	1	1	0	0	0	0
NA_001_032_H	1	4	Kalokengel	2	Lobei	1	Lore alorot	1	NA_001_032	1	8	2	36	2	36	0	1		0	1		1	0.268542	1	1	1	0	0	1	0	0	0	0	1	4	2	0	0	0	0	1	0	0	0	0	0	0	0
NA_013_089_H	1	4	Lomuno	4	Nakaramwae	13	Lore Angoriaale	1	NA_013_089	2	8	2	36	2	36	0	1		0	1		1	0	4	0	1	0	0	0	0	0	0	0	0	4	2	0	0	0	0	1	0	1	1	0	0	0	0
NA_017_055_H	0	4	Lomuno	4	Lopuu	17	Lore Apalomoe	1	NA_017_055	2	12	1	33	2	36	0	1		0	1		1	0.268542	1	1	1	0	0	1	0	0	0	0	0	4	2	0	0	0	0	1	0	1	1	0	0	0	0
NA_010_045_H	0	4	Moruongor	5	Loolim	10	Not applicable	0	NA_010_045	2	12	2	35	2	35	0	4		1	4		3	0.721107	1	1	1	0	1	1	1	0	1	0	0	4	2	0	0	0	1	0	0	1	0	0	1	0	0
NA_022_025_H	0	5	Nakichumet	6	Atedeoi	22	Not applicable	0	NA_022_025	1	10	2	35	2	35	0	1		0	1		1	0.383165	1	1	1	0	0	1	0	0	0	0	0	5	3	0	0	0	0	1	0	1	1	0	0	0	1	Water tank
NA_007_011_H	1	4	Kalokengel	2	Angarab	7	Lore Kootyang	1	NA_007_011	1	9	2	35	2	35	0	1		0	1		1	0	3	0	0	0	0	0	0	0	0	0	0	4	2	0	0	0	0	1	0	1	1	0	0	0	0
NA_009_003_H	1	4	Nariamaregae	7	Longaroi	9	Lore Apathiya	1	NA_009_003	1	12	2	35	2	35	0	1		0	1		1	1.00888	2	0	1	1	0	1	1	0	1	0	1	4	2	0	0	0	1	0	0	1	1	0	0	0	0
NA_014_065_H	1	4	Moruongor	5	Naoi	14	Lore Aichongat	1	NA_014_065	1	10	2	35	2	35	0	1		0	1		1	0	2	0	1	0	0	0	0	0	0	0	0	4	2	0	0	0	1	0	0	1	1	0	0	0	0
NA_015_001_H	0	4	Moruongor	5	Naitakosowan	15	Lore Apangaari	1	NA_015_001	1	10	1	35	1	35	0	1		0	1		1	0	1	1	0	0	0	0	0	0	0	0	0	4	2	0	0	0	1	0	0	1	1	0	0	0	0
NA_015_016_H	1	4	Moruongor	5	Naitakosowan	15	Lore Apangaari	1	NA_015_016	1	9	2	35	2	35	0	1		0	1		1	0	3	0	0	0	0	0	0	0	0	0	0	4	2	0	0	0	1	0	0	1	1	0	0	0	0
NA_016_010_H	0	4	Kalokengel	2	Lominit	16	Lore Achuule	1	NA_016_010	1	9	2	35	2	35	0	1		0	1		1	0	3	0	1	0	0	0	0	0	0	0	1	4	2	0	0	0	1	0	0	0	0	0	0	0	0
NA_021_056_H	0	5	Nakichumet	6	Kanaura	21	Not applicable	0	NA_021_056	2	8	2	35	2	35	0	1		0	1		1	0	1	1	0	0	0	0	0	0	0	0	1	5	3	0	0	0	0	1	0	1	1	0	0	0	0
NA_024_046_H	0	5	Nakichumet	6	Natirae A	24	Not applicable	0	NA_024_046	2	9	2	35	2	35	0	1		0	1		1	0.268542	1	1	0	0	0	1	0	0	0	0	0	5	3	0	0	0	0	1	0	1	1	0	0	0	0
NA_025_002_H	0	5	Nakichumet	6	Natirae B	25	Not applicable	0	NA_025_002	1	10	2	35	2	35	0	1		0	1		1	0.656218	1	1	1	0	0	1	1	0	0	0	1	5	3	0	0	0	0	1	0	1	1	0	1	0	0
NA_024_033_H	0	5	Nakichumet	6	Natirae A	24	Not applicable	0	NA_024_033	1	8	2	35	2	35	0	1		0	1		1	0.383165	1	1	0	0	0	1	0	0	0	0	0	5	3	0	0	0	0	0	0	1	1	0	0	0	0
NA_006_069_H	1	4	Kalokengel	2	Akwapuwa-Loluk	6	Lore Apakarengit	1	NA_006_069	1	8	2	35	2	35	0	1		0	1		1	0	1	1	1	0	0	0	0	0	0	0	0	4	2	0	0	0	1	0	0	1	1	0	0	0	0
NA_009_006_H	0	4	Nariamaregae	7	Longaroi	9	Lore Angakimak	1	NA_009_006	1	12	2	35	2	35	0	1		0	1		1	0	1	1	0	0	0	0	0	0	0	0	0	4	2	0	0	0	0	1	0	1	1	1	0	0	0
NA_021_102_H	0	5	Nakichumet	6	Kanaura	21	Not applicable	0	NA_021_102	2	8	2	35	2	35	0	1		0	1		1	0.567187	1	1	0	0	0	0	1	0	1	0	0	2	1	0	0	0	0	1	0	1	1	0	0	0	0
NA_023_065_H	0	11	Dirtics	1	Kotipe	23	Not applicable	0	NA_023_065	2	9	2	35	2	35	0	1		0	1		1	0.552676	1	1	0	0	0	0	1	1	1	0	1	2	1	0	0	0	0	1	0	1	1	0	0	0	0
NA_015_053_H	0	4	Moruongor	5	Naitakosowan	15	Lore Apangaari	1	NA_015_053	1	10	2	25	2	35	0	4		1	1		1	0.268542	2	0	0	0	0	1	0	0	0	0	0	4	2	0	0	0	1	0	0	1	1	0	0	0	0
NA_006_077_H	1	4	Kalokengel	2	Akwapuwa-Loluk	6	Lore Alotimong	1	NA_006_077	1	8	1	56	2	34	0	1		0	1		1	0	1	1	1	0	0	0	0	0	0	0	0	5	3	0	0	0	1	0	0	1	1	0	0	0	0
NA_013_061_H	1	4	Lomuno	4	Nakaramwae	13	Lore Angoriaale	1	NA_013_061	2	12	2	36	2	34	0	1		0	1		1	0.368655	3	0	1	0	0	1	0	1	0	0	1	4	2	0	0	0	0	1	0	1	1	0	0	0	0
NA_004_091_H	1	4	Lomuno	4	Naoyaminit	4	Lore Apalowal	1	NA_004_091	1	14	2	34	2	34	0	4		1	4		3	0.383165	1	1	1	0	0	1	0	0	0	0	1	4	2	0	0	0	0	1	0	1	1	0	0	0	0
NA_009_019_H	1	4	Nariamaregae	7	Longaroi	9	Lore Kookudet	1	NA_009_019	2	10	2	34	2	34	0	1		0	1		1	0.268542	3	0	1	0	0	1	0	0	0	0	1	4	2	0	0	0	1	0	0	1	1	0	0	0	1	Bucket
NA_009_026_H	0	4	Nariamaregae	7	Longaroi	9	Lore Angimiroo	1	NA_009_026	2	8	2	34	2	34	0	1		0	1		1	0.273053	1	1	0	0	0	0	1	0	0	0	1	4	2	0	0	0	1	1	0	1	1	0	0	0	1	Bucket
NA_010_070_H	0	4	Moruongor	5	Loolim	10	Not applicable	0	NA_010_070	2	13	2	34	2	34	0	1		0	1		1	0	1	1	1	0	0	0	0	0	0	0	1	4	2	0	0	0	1	0	0	1	1	0	0	0	0
NA_013_068_H	1	4	Lomuno	4	Nakaramwae	13	Lore Alochiyo	1	NA_013_068	2	10	2	34	2	34	0	1		0	1		1	0	1	1	1	0	0	0	0	0	0	0	1	4	2	0	0	0	0	1	0	1	1	0	0	0	0
NA_015_077_H	1	4	Moruongor	5	Naitakosowan	15	Lore Kaakol	1	NA_015_077	1	10	2	34	2	34	0	1		0	1		1	0	3	0	1	0	0	0	0	0	0	0	0	4	2	0	0	0	1	0	0	1	1	0	0	0	0
NA_021_021_H	0	5	Nakichumet	6	Kanaura	21	Not applicable	0	NA_021_021	2	12	2	34	2	34	0	1		0	1		1	0.114623	3	0	1	0	0	0	0	0	0	0	0	5	3	0	0	0	0	1	0	1	1	0	0	0	0
NA_021_035_H	0	5	Nakichumet	6	Kanaura	21	Not applicable	0	NA_021_035	1	13	2	34	2	34	0	1		0	1		1	0.179511	1	1	0	0	0	0	0	0	1	0	1	2	1	0	0	0	1	0	0	1	1	0	0	0	0
NA_021_091_H	0	5	Nakichumet	6	Kanaura	21	Not applicable	0	NA_021_091	1	12	2	34	2	34	0	1		0	1		1	0	3	0	1	0	0	0	0	0	0	0	0	5	3	0	0	0	1	0	0	1	1	0	0	0	0
NA_023_054_H	0	11	Dirtics	1	Kotipe	23	Not applicable	0	NA_023_054	2	9	2	34	2	34	0	1		0	1		1	0.268542	3	0	1	0	0	1	0	0	0	0	0	5	3	0	0	0	0	1	0	1	1	0	0	0	0
NA_012_039_H	1	4	Kalokengel	2	Naitakwae	12	Lore Apalotuko	1	NA_012_039	1	8	2	34	2	34	0	1		0	1		1	0.273053	3	0	1	0	0	0	1	0	0	0	0	4	2	0	0	0	0	1	0	1	1	0	0	0	0
NA_017_077_H	1	4	Lomuno	4	Lopuu	17	Lore Alokol	1	NA_017_077	1	9	2	34	2	34	0	1		0	1		1	0.448054	1	1	1	0	0	1	0	0	1	0	0	4	2	0	0	0	0	1	0	0	0	0	0	0	0
NA_020_011_H	0	5	Lokupoi	3	Lokupoi TC -Lokitela	20	Lore Akotol	1	NA_020-011	1		1	34	1	34	0	1		0	1		1	0.835729	1	1	1	0	0	1	1	0	1	0	1	4	2	0	0	0	1	0	0	1	1	1	0	0	0
NA_023_019_H	0	11	Dirtics	1	Kotipe	23	Not applicable	0	NA_023_019	2	12	2	34	2	34	0	1		0	1		1	0	3	0	1	0	0	0	0	0	0	0	0	5	3	0	0	0	0	1	0	1	1	0	0	0	0
NA_021_052_H	0	5	Nakichumet	6	Kanaura	21	Not applicable	0	NA_021_052	1	8	1	60	2	33	0	1		0	1		1	0.114623	1	1	0	0	0	0	0	0	0	0	0	2	1	0	0	0	1	0	0	1	1	0	0	0	0
NA_023_038_H	0	11	Dirtics	1	Kotipe	23	Not applicable	0	NA_023_038	2	10	2	38	2	33	0	1		0	1		1	0.268542	1	1	1	0	0	1	0	0	0	0	0	2	1	0	0	0	0	1	0	1	1	0	0	0	0
NA_005_023_H	0	4	Kalokengel	2	Nachuka	5	Lore Alotee	1	NA_005_023	2	8	2	33	2	33	0	1		0	1		1	0.268542	1	1	1	0	0	1	0	0	0	0	1	4	2	0	0	0	0	1	0	1	1	0	0	0	0
NA_014_084_H	0	4	Moruongor	5	Naoi	14	Lore Keekwaputh	1	NA_014_084	1	9	2	33	2	33	0	1		0	1		1	0	1	1	1	0	0	0	0	0	0	0	0	4	2	0	0	0	1	0	0	1	1	0	0	0	0
NA_015_051_H	0	4	Moruongor	5	Naitakosowan	15	Lore Apangaari	1	NA_015_051	1	12	2	33	2	33	0	1		0	1		1	0	3	0	0	0	0	0	0	0	0	0	0	4	2	0	0	0	1	0	0	0	0	0	0	0	0
NA_016_012_H	1	4	Kalokengel	2	Lominit	16	Lore Achuule	1	NA_016_012	2	8	2	33	2	33	0	1		0	1		1	0.656218	3	0	0	0	0	1	1	0	0	0	0	4	2	0	0	0	1	0	0	1	1	0	0	0	0
NA_017_060_H	0	4	Lomuno	4	Lopuu	17	Lore Apalomoe	1	NA_017_060	2	10	2	33	2	33	0	1		0	1		1	0.114623	1	1	1	0	0	0	0	0	0	0	1	4	2	0	0	0	0	1	0	1	1	0	0	0	0
NA_018_017_H	0	4	Moruongor	5	Kaingolejek	17	Lore Apomomwo	1	NA_018_017	2	9	2	33	2	33	0	1		0	1		1	0.448054	1	1	1	0	0	1	0	0	1	0	1	5	3	0	0	0	1	0	0	0	0	0	0	0	0
NA_020_008_H	0	5	Lokupoi	3	Lokupoi TC -Lokitela	20	Lore Akotol	1	NA_020_008	2	10	2	33	2	33	0	1		0	1		1	0	1	1	0	0	0	0	0	0	0	0	0	4	2	0	0	0	0	1	0	1	1	0	0	0	0
NA_020_042_H	0	5	Lokupoi	3	Lokupoi TC -Lokitela	20	Lore Apaangakorio	1	NA_020_042	2	12	2	33	2	33	0	1		0	1		1	0	3	0	1	0	0	0	0	0	0	0	0	4	2	0	0	0	1	0	0	0	0	0	0	0	0
NA_022_002_H	0	5	Nakichumet	6	Atedeoi	22	Not applicable	0	NA_022_002	2	10	2	33	2	33	0	1		0	1		1	0.383165	3	0	1	0	0	1	0	0	0	0	0	5	3	0	0	0	0	1	0	0	0	0	0	0	0
NA_022_029_H	0	5	Nakichumet	6	Atedeoi	22	Not applicable	0	NA_022_029	2	12	2	33	2	33	0	1		0	1		1	0.273053	1	1	0	0	0	0	1	0	0	0	1	5	3	0	0	0	0	1	0	1	1	0	0	0	0
NA_021_065_H	0	5	Nakichumet	6	Kanaura	21	Not applicable	0	NA_021_065	2	10	2	33	2	33	0	1		0	1		1	0.541595	1	1	0	0	0	1	1	0	0	0	0	4	2	0	0	0	0	1	0	1	1	0	0	0	0
NA_006_060_H	1	4	Kalokengel	2	Akwapuwa-Loluk	6	Lore Alotimong	1	NA_006_060	2	8	2	33	2	33	0	1		0	1		1	0	1	1	1	0	0	0	0	0	0	0	0	5	3	0	0	0	1	0	0	1	1	0	0	0	0
NA_017_082_H	1	4	Lomuno	4	Lopuu	17	Lore Apalomoe	1	NA_017_082	1	9	2	33	2	33	0	3		1	1		1	0.273053	1	1	1	0	0	0	1	0	0	0	0	4	2	0	0	0	0	1	0	1	1	0	0	0	0
NA_021_099_H	0	5	Nakichumet	6	Kanaura	21	Not applicable	0	NA_021_099	2	8	2	33	2	33	0	1		0	1		1	0.670938	1	1	0	1	1	1	0	0	0	0	1	1	1	0	0	0	1	0	0	1	1	0	0	0	0
NA_004_044_H	1	4	Lomuno	4	Naoyaminit	4	Lore Aporengereng	1	NA_004_044	2	14	2	32	2	33	0	4		1	1		1	0.541595	2	0	1	0	0	1	1	0	0	0	1	4	2	0	0	0	1	0	0	1	1	0	0	0	0
NA_010_050_H	0	4	Moruongor	5	Loolim	10	Not applicable	0	NA_010_050	2	13	2	32	2	32	0	4		1	4		3	0.670938	1	1	1	1	0	1	0	0	0	0	1	4	2	0	0	0	1	0	0	1	1	0	0	0	1	Bucket
NA_021_010_H	0	5	Nakichumet	6	Kanaura	21	Not applicable	0	NA_021_010	2	12	2	32	2	32	0	1		0	1		1	0	2	0	1	0	0	0	0	0	0	0	0	4	2	0	0	0	1	0	0	1	1	0	0	0	1	Bucket
NA_004_001_H	0	4	Lomuno	4	Naoyaminit	4	Lore Aporengereng	1	NA_004_001	2	8	2	32	2	32	0	1		0	1		1	0.268542	3	0	1	0	0	1	0	0	0	0	1	4	2	0	0	0	1	0	0	1	1	0	0	0	0
NA_010_100 _H	0	4	Moruongor	5	Loolim	10	Lore Apalomwae	1	NA_010_100	1	12	2	32	2	32	0	1		0	1		1	0.268542	3	0	0	0	0	1	0	0	0	0	1	4	2	0	0	0	1	0	0	1	1	0	0	0	0
NA_013_052_H	0	4	Lomuno	4	Nakaramwae	13	Lore Alochiyo	1	NA_013_052	2	14	2	32	2	32	0	1		0	1		1	0.641707	3	0	0	0	0	1	1	1	0	0	1	4	2	0	0	0	0	1	0	1	1	0	0	0	0
NA_014_011_H	1	4	Moruongor	5	Naoi	14	Lore Keekwaputh	1	NA_014_011	1	12	2	32	2	32	0	1		0	1		1	0	1	1	0	0	0	0	0	0	0	0	0	4	2	0	0	0	1	0	0	1	1	0	0	0	0
NA_021_084_H	0	5	Nakichumet	6	Kanaura	21	Not applicable	0	NA_021_084	2	8	2	32	2	32	0	1		0	1		1	0.268542	1	1	0	0	0	1	0	0	0	0	0	5	3	0	0	0	1	0	0	1	1	0	0	0	0
NA_022_022_H	0	5	Nakichumet	6	Atedeoi	22	Not applicable	0	NA_022_022	2	10	2	32	2	32	0	1		0	1		1	0.835729	1	1	1	0	0	1	1	0	1	0	0	5	3	0	0	0	0	1	0	0	0	0	0	0	0
NA_023_068_H	0	11	Dirtics	1	Kotipe	23	Not applicable	0	NA_023_068	2	11	2	32	2	32	0	1		0	1		1	0	1	1	0	0	0	0	0	0	0	0	1	2	1	0	0	0	0	1	0	1	1	0	0	0	0
NA_024_012_H	0	5	Nakichumet	6	Natirae A	24	Not applicable	0	NA_024_012	2	9	2	32	2	32	0	1		0	1		1	0.656218	1	1	1	0	0	1	1	0	0	0	1	5	3	0	0	0	0	1	0	1	1	0	0	0	1	Bucket
NA_019_026_H	0	4	Moruongor	5	Angaro	19	Lore Amoding	1	NA_019_026	2	8	2	32	2	32	0	1		0	1		1	0.850449	1	1	1	1	0	1	0	0	1	0	1	7		0	1	0	1	0	0	1	0	0	1	0	0
NA_024_045_H	0	5	Nakichumet	6	Natirae A	24	Not applicable	0	NA_024_045	2	9	2	32	2	32	0	1		0	1		1	0.268542	1	1	1	0	0	1	0	0	0	0	1	4	2	0	0	0	0	1	0	1	1	0	0	0	0
NA_010_104_H	1	4	Moruongor	5	Loolim	10	Not applicable	0	NA_010_104	1	12	2	32	2	32	0	1		0	1		1	0.835729	1	1	1	0	0	1	1	0	1	0	1	4	2	0	0	0	1	0	0	1	1	0	0	0	0
NA_012_037_H	1	4	Kalokengel	2	Naitakwae	12	Lore Apalotom	1	NA_012_037	2	10	2	32	2	32	0	1		0	1		1	0	3	0	1	0	0	0	0	0	0	0	0	4	2	0	0	0	0	1	0	1	1	0	0	0	0
NA_014_085_H	1	4	Moruongor	5	Naoi	14	Lore Aichongat	1	NA_014_085	1	10	2	32	2	32	0	1		0	1		1	0	1	1	0	0	0	0	0	0	0	0	0	4	2	0	0	0	0	1	0	1	1	1	0	0	0
NA_015_048_H	0	4	Moruongor	5	Naitakosowan	15	Lore Kaakol	1	NA_015_048	2	11	2	32	2	32	0	1		0	1		1	0	1	1	1	0	0	0	0	0	0	0	1	4	2	0	0	0	1	0	0	1	1	0	0	0	0
NA_003_052_H	1	4	Kalokengel	2	Naregei-Nakoreete	3	Lore Apokomol	1	NA_003_052	2	14	2	32	2	32	0	1		0	1		1	0	1	1	1	0	0	0	0	0	0	0	1	4	2	0	0	0	0	1	0	1	1	0	0	0	0
NA_025_036_H	0	5	Nakichumet	6	Natirae A	25	Not applicable	0	NA_025_036	2	9	2	32	2	32	0	1		0	1		1	0.656218	3	0	1	0	0	1	1	0	0	0	1	5	3	0	0	0	0	1	0	1	1	0	0	0	1	Bucket
NA_020_019_H	0	5	Lokupoi	3	Lokupoi TC -Lokitela	20	Lore Alokai	1	NA_020_019	2	12	1	43	2	31	0	1		0	1		1	0	1	1	1	0	0	0	0	0	0	0	0	4	2	0	0	0	1	0	0	1	1	0	1	0	0
NA_008_009_H	1	4	Moruongor	5	Naronit	8	Lore Lokawa	1	NA_008_009	2	10	2	31	2	31	0	1		0	1		1	0	1	1	0	0	0	0	0	0	0	0	1	4	2	0	0	0	1	0	0	1	1	0	0	0	1	Bucket
NA_023_061_H	0	11	Dirtics	1	Kotipe	23	Not applicable	0	NA_023_061	1	8	2	31	2	31	0	1		0	1		1	0.268542	1	1	1	0	0	1	0	0	0	0	0	5	3	0	0	0	0	1	0	1	1	0	0	0	0
NA_012_001_H	1	4	Kalokengel	2	Naitakwae	12	Lore Apalotuko	1	NA_012_001	1	12	2	31	2	31	0	1		0	1		1	0.448054	1	1	1	0	0	1	0	0	1	0	1	4	2	0	0	0	0	1	0	1	1	0	0	0	0
NA_024_039_H	0	5	Nakichumet	6	Natirae A	24	Not applicable	0	NA_024_039	1	8	1	31	1	31	0	1		0	1		1	0.179511	1	1	0	0	0	0	0	0	1	0	0	4	2	0	0	0	0	1	0	1	1	0	0	0	0
NA_006_023_H	0	4	Kalokengel	2	Akwapuwa-Loluk	6	Lore Apakarengit	1	NA_006_023	2	8	2	31	2	31	0	1		0	1		1	0	1	1	1	0	0	0	0	0	0	0	0	4	2	0	0	0	1	0	0	1	1	0	0	0	0
NA_021_069_H	0	5	Nakichumet	6	Kanaura	21	Not applicable	0	NA_021_069	2	11	2	31	2	31	0	1		0	1		1	0	3	0	1	0	0	0	0	0	0	0	0	1	1	0	0	0	0	1	0	1	1	0	0	0	0
NA_021_036_H	0	5	Nakichumet	6	Kanaura	21	Not applicable	0	NA_021_036	1	9	2	31	2	31	0	1		0	1		1	0.100112	2	0	1	0	0	0	0	1	0	0	1	5	3	0	0	0	0	1	0	1	1	0	0	0	0
NA_017_027_H	0	4	Lomuno	4	Lopuu	17	Lore Lokiteded	1	NA_017_027	2	8	1	39	2	30	0	1		0	1		1	0.541595	3	0	0	0	0	1	1	0	0	0	0	4	2	0	0	0	1	0	0	1	1	0	0	0	0
NA_017_048_H	0	4	Lomuno	4	Lopuu	17	Lore Alokol	1	NA_017_048	1	14	2	36	2	30	0	4		1	1		1	0.656218	3	0	1	0	0	1	1	0	0	0	1	4	2	0	0	0	1	0	0	1	1	0	0	0	0
NA_005_043_H	0	4	Kalokengel	2	Nachuka	5	Lore Koopuwa	1	NA_005_043	2	10	2	32	2	30	0	1		0	1		1	0.273053	1	1	1	0	0	0	1	0	0	0	1	4	2	0	0	0	0	1	0	1	1	0	0	0	0
NA_023_056_H	0	11	Dirtics	1	Kotipe	23	Not applicable	0	NA_023_056	2	8	1	32	2	30	0	1		0	1		1	0	3	0	0	0	0	0	0	0	0	0	0	2	1	0	0	0	0	1	0	1	1	0	0	0	0
NA_004_021_H	1	4	Lomuno	4	Naoyaminit	4	Lore Alouro	1	NA_004_021	2	8	2	30	2	30	0	1		0	1		1	0.287773	1	1	1	1	0	0	0	0	0	0	1	4	2	0	0	0	1	0	0	1	1	0	0	0	0
NA_004_023_H	0	4	Lomuno	4	Naoyaminit	4	Lore Aporengereng	1	NA_004_023	2	8	2	30	2	30	0	1		0	1		1	0	3	0	1	0	0	0	0	0	0	0	0	4	2	0	0	0	1	0	0	1	1	0	0	0	0
NA_004_080_H	0	4	Lomuno	4	Naoyaminit	4	Lore Apalowal	1	NA_004_080	1	8	2	30	2	30	0	1		0	1		1	0.268542	1	1	0	0	0	1	0	0	0	0	0	4	2	0	0	0	1	0	0	1	1	0	0	0	0
NA_005_011_H	1	4	Kalokengel	2	Nachuka	5	Lore Koopuwa	1	NA_005_011	1	8	2	30	2	30	0	1		0	1		1	0	1	1	1	0	0	0	0	0	0	0	1	4	2	0	0	0	0	1	0	1	1	0	0	0	0
NA_005_026_H	1	4	Kalokengel	2	Nachuka	5	Lore Kaapuun	1	NA_005_026	2	13	2	30	2	30	0	1		0	1		1	0	1	1	0	0	0	0	0	0	0	0	0	4	2	0	0	0	0	1	0	1	1	0	0	0	0
NA_005_047_H	1	4	Kalokengel	2	Nachuka	5	Lore Alotee	1	NA_005_047	1	8	2	30	2	30	0	1		0	1		1	0.268542	1	1	1	0	0	1	0	0	0	0	0	4	2	0	0	0	0	1	0	1	1	0	0	0	0
NA_005_054_H	1	4	Kalokengel	2	Nachuka	5	Lore Kaapuun	1	NA_005_054	2	10	2	30	2	30	0	1		0	1		1	0	1	1	1	0	0	0	0	0	0	0	1	4	2	0	0	0	0	1	0	1	1	0	0	0	0
NA_009_032_H	1	4	Nariamaregae	7	Longaroi	9	Lore Angimiroo	1	NA_009_032	1	10	2	30	2	30	0	1		0	1		1	0	3	0	1	0	0	0	0	0	0	0	0	4	2	0	0	0	1	0	0	1	1	0	0	0	0
NA_009_066_H	1	4	Nariamaregae	7	Longaroi	9	Lore Kaalbert	1	NA_009_066	1	8	2	30	2	30	0	1		0	1		1	0.179511	1	1	0	0	0	0	0	0	1	0	1	4	2	0	1	0	1	1	0	1	0	1	0	0	1	Bucket
NA_010_004_H	1	4	Moruongor	5	Loolim	10	Not applicable	0	NA_010_004	2	11	2	30	2	30	0	1		0	1		1	0	1	1	0	0	0	0	0	0	0	0	0	4	2	0	0	0	1	0	0	1	1	0	0	0	0
NA_010_088_H	1	4	Moruongor	5	Loolim	10	Not applicable	0	NA_010_088	2	9	2	30	2	30	0	1		0	1		1	0	1	1	0	0	0	0	0	0	0	0	0	4	2	0	0	0	1	0	0	1	1	0	0	0	1	Bucket
NA_010_098_H	0	4	Moruongor	5	Loolim	10	Lore Alokoi	1	NA_010_098	1	12	2	30	2	30	0	1		0	1		1	0.383165	1	1	0	0	0	1	0	0	0	0	0	4	2	0	0	0	1	0	0	1	1	0	0	0	0
NA_010_110_H	0	4	Moruongor	5	Loolim	10	Lore Apalomwae	1	NA_010_110	1	9	2	30	2	30	0	1		0	1		1	0.273053	3	0	0	0	0	0	1	0	0	0	1	4	2	0	0	0	1	0	0	1	1	0	0	0	0
NA_014_031_H	0	4	Moruongor	5	Naoi	14	Lore Keekwaputh	1	NA_014_031	2	9	2	30	2	30	0	1		0	1		1	0.268542	3	0	0	0	0	1	0	0	0	0	0	4	2	0	0	0	1	0	0	1	1	0	0	0	0
NA_014_033_H	0	4	Moruongor	5	Naoi	14	Lore Keekwaputh	1	NA_014_033	1	11	2	30	2	30	0	1		0	1		1	0.268542	1	1	1	0	0	1	0	0	0	0	0	4	2	0	0	0	1	0	0	1	1	0	0	0	1	Bucket
NA_015_057_H	1	4	Moruongor	5	Naitakosowan	15	Lore Apaepela	1	NA_015_057	1	12	2	30	2	30	0	1		0	1		1	0	1	1	1	0	0	0	0	0	0	0	0	4	2	0	0	0	1	0	0	1	1	0	0	0	0
NA_016_031_H	0	4	Kalokengel	2	Lominit	16	Lore Aloitanin	1	NA_016_031	2	10	2	30	2	30	0	3		1	3		3	0.268542	3	0	0	0	0	1	0	0	0	0	0	4	2	0	0	0	0	1	0	1	1	0	0	0	0
NA_016_032_H	0	4	Kalokengel	2	Lominit	16	Lore Achuule	1	NA_016_032	2	10	2	30	2	30	0	3		1	3		3	0.562677	1	1	1	0	0	1	0	0	1	0	1	4	2	0	0	0	1	0	0	1	1	0	0	0	0
NA_017_037_H	0	4	Lomuno	4	Lopuu	17	Lore Lokiteded	1	NA_017_037	1	9	2	30	2	30	0	1		0	1		1	0	1	1	1	0	0	0	0	0	0	0	1	4	2	0	0	0	1	0	0	1	1	0	0	0	0
NA_018_023_H	0	4	Moruongor	5	Kaingolejek	18	Lore Apooreng	1	NA_018_023	2	10	2	30	2	30	0	1		0	1		1	0	1	1	1	0	0	0	0	0	0	0	0	4	2	0	0	0	1	0	0	0	0	0	0	0	0
NA_018_042_H	0	4	Moruongor	5	Kaingolejek	18	Lore Apomomwo	1	NA_018_042	2	10	2	30	2	30	0	1		0	1		1	0	3	0	0	0	0	0	0	0	0	0	0	5	3	0	0	0	1	1	0	1	1	0	0	0	0
NA_021_030_H	0	5	Nakichumet	6	Kanaura	21	Not applicable	0	NA_021_030	2	9	2	30	2	30	0	1		0	1		1	0.268542	1	1	1	0	0	1	0	0	0	0	1	5	3	0	0	0	1	0	0	1	1	0	1	0	0
NA_021_103_H	0	5	Nakichumet	6	Kanaura	21	Not applicable	0	NA_021_103	1	8	2	30	2	30	0	1		0	1		1	0.268542	1	1	0	0	0	1	0	0	0	0	0	4	2	0	0	0	0	1	0	1	1	0	0	0	0
NA_022_004_H	0	5	Nakichumet	6	Atedeoi	22	Not applicable	0	NA_022_004	1	9	2	30	2	30	0	1		0	1		1	0.541595	1	1	0	0	0	1	1	0	0	0	1	4	2	0	0	0	0	1	0	1	1	0	0	0	0
NA_022_018_H	0	5	Nakichumet	6	Atedeoi	22	Not applicable	0	NA_022_018	2	9	2	30	2	30	0	1		0	1		1	0.114623	1	1	1	0	0	0	0	0	0	0	1	5	3	0	0	0	0	1	0	0	0	0	0	0	0
NA_023_055_H	0	11	Dirtics	1	Kotipe	23	Not applicable	0	NA_023_055	2	8	2	30	2	30	0	1		0	1		1	0.387676	1	1	1	0	0	0	1	0	0	0	0	5	3	0	0	0	0	1	0	1	1	0	0	0	0
NA_024_016_H	0	5	Nakichumet	6	Natirae A	24	Not applicable	0	NA_024_016	2	9	2	30	2	30	0	1		0	1		1	0.268542	1	1	1	0	0	1	0	0	0	0	1	5	3	0	0	0	0	1	0	1	1	0	0	0	0
NA_024_035_H	0	5	Nakichumet	6	Natirae A	24	Not applicable	0	NA_024_035	2	12	2	30	2	30	0	1		0	1		1	0.273053	3	0	0	0	0	0	1	0	0	0	0	5	3	0	0	0	0	1	0	1	1	0	0	0	0
NA_021_015_H	0	5	Nakichumet	6	Kanaura	21	Not applicable	0	NA_021_015	2	10	2	30	2	30	0	1		0	1		1	0.656218	1	1	1	0	0	1	1	0	0	0	0	4	2	0	0	0	0	1	0	1	1	0	0	0	0
NA_024_008_H	0	5	Nakichumet	6	Natirae A	24	Not applicable	0	NA_024_008	2	12	2	30	2	30	0	1		0	1		1	0.268542	1	1	1	0	0	1	0	0	0	0	0	4	2	0	0	0	0	1	0	1	1	0	0	0	0
NA_025_020_H	0	5	Nakichumet	6	Natirae B	25	Not applicable	0	NA_025_020	1	10	2	30	2	30	0	4		1	4		3	0.541595	1	1	1	0	0	1	1	0	0	0	1	4	2	0	0	0	0	1	0	1	1	0	0	0	0
NA_001_016_H	1	4	Kalokengel	2	Lobei	1	Lore aMoses	1	NA_001_016	2	9	2	30	2	30	0	1		0	1		1	0	1	1	1	0	0	0	0	0	0	0	0	4	2	0	0	0	1	1	0	0	0	0	0	0	0
NA_005_013_H	1	4	Kalokengel	2	Nachuka	5	Lore Koopuwa	1	NA_005_013	2	8	2	30	2	30	0	1		0	1		1	0	1	1	1	0	0	0	0	0	0	0	1	4	2	0	0	0	0	1	0	1	1	0	0	0	0
NA_010_047_H	0	4	Moruongor	5	Loolim	10	Not applicable	0	NA_010_047	2	8	2	30	2	30	0	1		0	1		1	0.541595	3	0	0	0	0	1	1	0	0	0	0	4	2	0	0	0	1	0	0	1	1	0	0	0	0
NA_014_005_H	1	4	Moruongor	5	Naoi	14	Lore Aichongat	1	NA_014_005	2	10	2	30	2	30	0	1		0	1		1	0.268542	3	0	0	0	0	1	0	0	0	0	0	4	2	0	0	0	0	1	0	1	1	0	0	0	0
NA_016_011_H	1	4	Kalokengel	2	Lominit	16	Lore Aloitanin	1	NA_016_011	2	10	2	30	2	30	0	1		0	1		1	0	3	0	0	0	0	0	0	0	0	0	0	4	2	0	0	0	1	0	0	0	0	0	0	0	0
NA_018_013_H	0	4	Moruongor	5	Kaingolejek	18	Lore Apameri	1	NA_018_013	2	11	2	30	2	30	0	1		0	1		1	0.114623	1	1	0	0	0	0	0	0	0	0	0	4	2	0	0	0	1	0	0	1	1	1	0	0	0
NA_015_052_H	0	4	Moruongor	5	Naitakosowan	15	Lore Apakoela	1	NA_015_052	2	12	2	30	2	30	0	1		0	1		1	0	1	1	0	0	0	0	0	0	0	0	1	4	2	0	0	0	1	0	0	1	1	0	0	0	0
NA_021_106_H	0	5	Nakichumet	6	Kanaura	21	Not applicable	0	NA_021_106	2	8	2	30	2	30	0	1		0	1		1	0	2	0	1	0	0	0	0	0	0	0	0	2	1	0	0	0	0	1	0	1	1	0	0	0	0
NA_018_031_H	0	4	Moruongor	5	Kaingolejek	18	Lore Apooreng	1	NA_018_031	2	10	2	28	1	30	0	1		0	1		1	1.1235	1	1	1	1	0	1	1	0	1	0	0	4	2	0	0	0	1	0	0	1	1	0	0	0	0
NA_016_055_H	1	4	Kalokengel	2	Lominit	16	Lore Achuule	1	NA_016_055	2	8	2	28	1	30	0	6	Brother-In-Law	1	3		3	0	3	0	1	0	0	0	0	0	0	0	1	4	2	0	0	0	1	0	0	1	1	0	0	0	0
NA_022_044_H	0	5	Nakichumet	6	Atedeoi	22	Not applicable	0	NA_022_044	2	12	2	26	2	30	0	4		1	1		1	0	1	1	1	0	0	0	0	0	0	0	0	5	3	0	0	0	0	1	0	1	1	0	0	0	0
NA_008_029_H	1	4	Moruongor	5	Naronit	8	Lore Amaide	1	NA_008_029	1	10	1	29	1	29	0	1		0	1		1	0.268542	1	1	0	0	0	1	0	0	0	0	0	4	2	0	0	0	1	0	0	1	1	0	0	0	0
NA_008_056_H	0	4	Moruongor	5	Naronit	8	Lore Abule	1	NA_008_056	2	12	2	29	2	29	0	4		1	4		3	0.735827	2	0	1	1	0	1	0	0	1	0	1	4	2	0	0	0	1	0	0	1	1	0	0	0	0
NA_017_059_H	0	4	Lomuno	4	Lopuu	17	Lore Alokol	1	NA_017_059	1	9	2	29	2	29	0	1		0	1		1	0.268542	1	1	1	0	0	1	0	0	0	0	0	4	2	0	0	0	1	0	0	0	0	0	0	0	0
NA_020_067_H	0	5	Lokupoi	3	Lokupoi TC -Lokitela	20	Lore Alokai	1	NA_020_067	2	8	2	29	2	29	0	1		0	1		1	0.656427	1	1	1	1	0	1	0	1	0	0	1	4	2	0	0	0	1	0	0	0	0	0	0	0	0
NA_021_029_H	0	5	Nakichumet	6	Kanaura	21	Not applicable	0	NA_021_029	2	9	2	29	2	29	0	1		0	1		1	0	1	1	1	0	0	0	0	0	0	0	0	5	3	0	0	0	1	0	0	1	1	0	0	0	1	Bucket
NA_021_100_H	0	5	Nakichumet	6	Kanaura	21	Not applicable	0	NA_021_100	2	8	2	29	2	29	0	1		0	1		1	0	2	0	1	0	0	0	0	0	0	0	0	5	3	0	0	0	1	0	0	1	1	0	1	0	0
NA_004_034_H	0	4	Lomuno	4	Naoyaminit	4	Lore Alouro	1	NA_004_034	2	8	2	29	2	29	0	1		0	1		1	0.448054	1	1	0	0	0	1	0	0	1	0	0	4	2	0	0	0	1	0	0	1	0	0	0	0	1	Bucket
NA_013_090_H	1	4	Lomuno	4	Nakaramwae	13	Lore Alochiyo	1	NA_013_090	2	8	2	62	1	28	1	4		1	2		2	0.383165	3	0	1	0	0	1	0	0	0	0	0	4	2	0	0	0	0	1	0	1	1	0	0	0	0
NA_021_017_H	0	5	Nakichumet	6	Kanaura	21	Not applicable	0	NA_021_017	2	12	1	50	2	28	0	1		0	1		1	0.541595	1	1	1	0	0	1	1	0	0	0	0	5	3	0	0	0	1	0	0	1	1	0	0	0	0
NA_019_028_H	0	4	Moruongor	5	Angaro	19	Lore Amoding	1	NA_019_028	2	8	2	48	2	28	0	3		1	3		3	0	1	1	1	0	0	0	0	0	0	0	1	4	2	0	0	0	1	0	0	0	0	0	0	0	0
NA_015_030_H	0	4	Moruongor	5	Naitakosowan	15	Lore Apangaari	1	NA_015_030	2	11	1	35	2	28	0	4		1	4		3	0.268542	3	0	0	0	0	1	0	0	0	0	0	4	2	0	0	0	1	0	0	1	1	0	0	1	0
NA_020_060_H	0	5	Lokupoi	3	Lokupoi TC -Lokitela	20	Lore Akotol	1	NA_020_060	2	10	1	32	2	28	0	1		0	1		1	0.541595	1	1	0	0	0	1	1	0	0	0	0	4	2	0	0	0	0	1	0	1	1	0	0	0	0
NA_015_026_H	1	4	Moruongor	5	Naitakosowan	15	Lore Kaakol	1	NA_015_026	2	11	2	28	2	28	0	4		1	4		3	0.556315	2	0	1	1	0	1	0	0	0	0	1	4	2	0	0	0	1	0	0	1	1	0	0	0	0
NA_004_055_H	0	4	Lomuno	4	Naoyaminit	4	Lore Keebutur	1	NA_004_055	2	10	2	28	2	28	0	1		0	1		1	0.268542	1	1	0	0	0	1	0	0	0	0	1	4	2	0	0	0	1	0	0	1	1	0	0	0	1	Bucket
NA_008_049_H	0	4	Moruongor	5	Naronit	8	Lore Abule	1	NA_008_049	2	9	2	28	2	28	0	1		0	1		1	0	3	0	1	0	0	0	0	0	0	0	1	4	2	0	0	0	1	0	0	1	1	0	0	0	0
NA_010_075_H	1	4	Moruongor	5	Loolim	10	Lore Alokoi	1	NA_010_075	1	14	2	28	2	28	0	1		0	1		1	0	3	0	0	0	0	0	0	0	0	0	0	4	2	0	0	0	1	0	0	1	1	0	0	0	0
NA_011_008_H	1	4	Lomuno	4	Adwaramukuny	11	Lore Alokikiya	1	NA_011_008	1	10	2	28	2	28	0	1		0	1		1	0	3	0	0	0	0	0	0	0	0	0	0	4	2	0	0	0	1	0	0	1	1	0	0	0	0
NA_018_041_H	0	4	Moruongor	5	Kaingolejek	18	Lore Apooreng	1	NA_018_041	1	8	2	28	2	28	0	2		1	1		1	0	1	1	0	0	0	0	0	0	0	0	0	4	2	0	0	0	1	0	0	1	1	0	0	0	0
NA_020_027_H	0	5	Lokupoi	3	Lokupoi TC -Lokitela	20	Lore Apaangakorio	1	NA_020_027	2	11	2	28	2	28	0	1		0	1		1	0.268542	1	1	1	0	0	1	0	0	0	0	1	4	2	0	0	0	1	0	0	0	0	0	0	0	0
NA_022_030_H	0	5	Nakichumet	6	Atedeoi	22	Not applicable	0	NA_022_030	2	10	2	28	2	28	0	1		0	1		1	0.114623	1	1	1	0	0	0	0	0	0	0	0	5	3	0	0	0	0	1	0	1	1	0	0	0	1	Bucket
NA_021_032_H	0	5	Nakichumet	6	Kanaura	21	Not applicable	0	NA_021_032	2	12	2	28	2	28	0	4		1	4		3	0.268542	2	0	1	0	0	1	0	0	0	0	1	2	1	0	0	0	1	0	0	1	1	0	0	0	0
NA_024_034_H	0	5	Nakichumet	6	Natirae A	24	Not applicable	0	NA_024_034	2	10	1	28	1	28	0	1		0	1		1	0.943991	1	1	1	1	0	1	1	0	0	0	1	4	2	0	0	0	0	1	0	1	1	0	0	0	0
NA_021_090_H	0	5	Nakichumet	6	Kanaura	21	Not applicable	0	NA_021_090	2	8	2	28	2	28	0	1		0	1		1	0	1	1	1	0	0	0	0	0	0	0	1	2	1	0	0	0	0	1	0	1	1	0	0	0	0
NA_021_063_H	0	5	Nakichumet	6	Kanaura	21	Not applicable	0	NA_021_063	1	9	1	36	2	27	0	1		0	1		1	0.387676	1	1	1	0	0	0	1	0	0	0	0	5	3	0	0	0	1	0	0	1	1	0	0	0	1	Bucket
NA_014_019_H	0	4	Moruongor	5	Naoi	14	Lore Keekwaputh	1	NA_014_019	1	10	2	29	2	27	0	1		0	1		1	0.268542	3	0	0	0	0	1	0	0	0	0	1	4	2	0	0	0	1	0	0	1	1	0	0	0	0
NA_004_054_H	0	4	Lomuno	4	Naoyaminit	4	Lore Alouro	1	NA_004_054	1	10	2	27	2	27	0	1		0	1		1	0	3	0	1	0	0	0	0	0	0	0	1	4	2	0	0	0	1	0	0	1	1	0	0	0	0
NA_006_057_H	1	4	Kalokengel	2	Akwapuwa-Loluk	6	Lore Alotimong	1	NA_006_057	1	8	2	27	2	27	0	1		0	1		1	0	1	1	1	0	0	0	0	0	0	0	0	5	3	0	0	0	1	0	0	1	1	0	0	0	0
NA_008_005_H	1	4	Moruongor	5	Naronit	8	Lore Amaide	1	NA_008_005	2	8	2	27	2	27	0	4		1	4		3	0.268542	1	1	1	0	0	1	0	0	0	0	1	4	2	0	0	0	1	0	0	1	1	0	0	0	0
NA_009_082_H	1	4	Nariamaregae	7	Longaroi	9	Lore Kaamunyinakori	1	NA_009_082	1	8	2	27	2	27	0	1		0	1		1	0	3	0	1	0	0	0	0	0	0	0	1	5	3	0	0	0	1	0	0	1	1	0	0	0	0
NA_010_009_H	1	4	Moruongor	5	Loolim	10	Not applicable	0	NA_010_009	2	12	2	27	2	27	0	4		1	4		3	0	2	0	1	0	0	0	0	0	0	0	0	4	2	0	0	0	1	0	0	1	1	0	0	0	0
NA_010_043_H	0	4	Moruongor	5	Loolim	10	Not applicable	0	NA_010_043	2	11	2	27	2	27	0	1		0	1		1	0.268542	2	0	0	0	0	1	0	0	0	0	1	4	2	0	0	0	1	0	0	1	1	0	0	0	0
NA_014_015_H	0	4	Moruongor	5	Naoi	14	Lore Keekwaputh	1	NA_014_015	2	8	2	27	2	27	0	1		0	1		1	0.556315	1	1	0	1	0	1	0	0	0	0	1	4	2	0	0	0	1	0	0	1	1	0	0	0	0
NA_017_039_H	1	4	Lomuno	4	Lopuu	17	Lore Lokiteded	1	NA_017_039	1	12	2	27	2	27	0	1		0	1		1	0.448054	1	1	0	0	0	1	0	0	1	0	1	4	2	0	0	0	1	0	0	1	1	0	0	0	0
NA_020_015_H	0	5	Lokupoi	3	Lokupoi TC -Lokitela	20	Lore Akotol	1	NA_020_015	2	8	2	27	2	27	0	1		0	1		1	0.268542	1	1	0	0	0	1	0	0	0	0	1	4	2	0	0	0	1	0	0	1	1	0	0	0	1	Bucket
NA_020_043_H	0	5	Lokupoi	3	Lokupoi TC -Lokitela	20	Lore Aloibok	1	NA_020_043	1	8	2	27	2	27	0	1		0	1		1	0	4	0	1	0	0	0	0	0	0	0	0	4	2	0	0	0	1	0	0	1	1	0	0	0	0
NA_021_105_H	0	5	Nakichumet	6	Kanaura	21	Not applicable	0	NA_021_105	2	8	2	27	2	27	0	1		0	1		1	0.268542	2	0	0	0	0	1	0	0	0	0	1	4	2	0	0	0	1	0	0	1	1	0	0	0	0
NA_022_017_H	0	5	Nakichumet	6	Atedeoi	22	Not applicable	0	NA_022_017	2	9	2	27	2	27	0	1		0	1		1	0.656218	1	1	0	0	0	1	1	0	0	0	1	5	3	0	0	0	0	1	0	1	1	0	1	0	0
NA_023_030_H	0	11	Dirtics	1	Kotipe	23	Not applicable	0	NA_023_030	2	12	2	27	2	27	0	6	Sister in-Law	1	6	Sister in-law	3	0.656218	1	1	1	0	0	1	1	0	0	0	0	5	3	0	0	0	0	1	0	1	1	0	0	0	1	Bucket
NA_025_033_H	0	5	Nakichumet	6	Natirae B	25	Not applicable	0	NA_025_033	2	9	2	27	2	27	0	3		1	3		3	0.721107	3	0	0	0	0	1	1	0	1	0	1	4	2	0	0	0	0	1	0	1	1	0	0	0	0
NA_023_046_H	0	11	Dirtics	1	Kotipe	23	Not applicable	0	NA_023_046	2	8	2	27	2	27	0	1		0	1		1	0	3	0	1	0	0	0	0	0	0	0	0	2	1	0	0	0	0	1	0	1	1	0	0	0	0
NA_014_075_H	1	4	Moruongor	5	Naoi	14	Lore Keekwaputh	1	NA_014_075	2	9	2	27	2	27	0	5		1	4		3	0.556315	1	1	1	1	0	1	0	0	0	0	1	4	2	0	0	0	0	0	1	1	1	0	0	0	0
NA_015_079_H	0	4	Moruongor	5	Naitakosowan	15	Lore Apaepela	1	NA_015_079	2	8	2	27	2	27	0	1		0	1		1	0.268542	3	0	0	0	0	1	0	0	0	0	0	4	2	0	0	0	1	0	0	1	1	0	0	0	0
NA_016_040_H	0	4	Kalokengel	2	Lominit	16	Lore Achuule	1	NA_016_040	2	8	2	27	2	27	0	1		0	1		1	0	3	0	1	0	0	0	0	0	0	0	0	4	2	0	0	0	1	0	0	1	1	0	0	0	0
NA_016_053_H	0	4	Kalokengel	2	Lominit	16	Lore Apalopale	1	NA_016_053	2	8	2	27	2	27	0	1		0	1		1	0	1	1	0	0	0	0	0	0	0	0	0	4	2	0	0	0	1	0	0	0	0	0	0	0	0
NA_015_070_H	0	4	Moruongor	5	Naitakosowan	15	Lore Apaepela	1	NA_015_070	1	14	2	27	2	27	0	1		0	1		1	0	3	0	0	0	0	0	0	0	0	0	0	4	2	0	0	0	1	0	0	1	1	0	0	0	0
NA_010_113_H	1	4	Moruongor	5	Loolim	10	Lore Alokoi	1	NA_010_113	1	8	2	26	2	27	0	1		0	1		1	0	3	0	0	0	0	0	0	0	0	0	0	4	2	0	0	0	1	0	0	1	1	0	0	0	0
NA_019_032_H	0	4	Moruongor	5	Angaro	19	Lore Amoding	1	NA_019_032	2	8	2	24	1	27	0	1		0	1		1	0	1	1	1	0	0	0	0	0	0	0	0	4	2	0	0	0	1	0	0	1	1	0	0	0	0
NA_004_048_H	1	4	Lomuno	4	Naoyaminit	4	Lore Alouro	1	NA_004_048	2	8	2	26	2	26	0	1		0	1		1	0	1	1	0	0	0	0	0	0	0	0	0	4	2	0	0	0	1	0	0	1	1	0	0	0	0
NA_009_061_H	0	4	Nariamaregae	7	Longaroi	9	Lore Angimiroo	1	NA_009_061	1	9	2	26	2	26	0	1		0	1		1	0.368655	2	0	0	0	0	1	0	1	0	0	1	4	2	0	0	0	1	0	0	1	1	0	0	0	0
NA_012_029_H	1	4	Kalokengel	2	Naitakwae	12	Lore Apalotuko	1	NA_012_029	1	11	2	26	2	26	0	3		1	3		3	0.268542	3	0	1	0	0	1	0	0	0	0	1	4	2	0	0	0	0	1	0	1	1	0	0	0	0
NA_012_040_H	1	4	Kalokengel	2	Naitakwae	12	Lore Apalotuko	1	NA_012_040	1	13	2	26	2	26	0	1		0	1		1	0.448054	3	0	1	0	0	1	0	0	1	0	0	4	2	0	0	0	0	1	0	1	1	0	0	0	0
NA_014_081_H	0	4	Moruongor	5	Naoi	14	Lore Keekwaputh	1	NA_014_081	2	11	2	26	2	26	0	4		1	4		3	0.452564	1	1	0	0	0	0	1	0	1	0	1	4	2	0	0	0	1	0	0	1	1	0	0	1	1	Bucket
NA_016_007_H	1	4	Kalokengel	2	Lominit	16	Lore Achuule	1	NA_016_007	2	10	2	26	2	26	0	1		0	4		3	0.268542	2	0	1	0	0	1	0	0	0	0	1	4	2	0	0	0	1	0	0	1	1	0	0	0	1	Bucket
NA_017_017_H	0	4	Lomuno	4	Lopuu	17	Lore Lokiteded	1	NA_017_017	2	8	2	26	2	26	0	1		0	1		1	0.268542	1	1	0	0	0	1	0	0	0	0	1	4	2	0	0	0	0	1	0	0	0	0	0	0	0
NA_021_053_H	0	5	Nakichumet	6	Kanaura	21	Not applicable	0	NA_021_053	2	8	2	26	2	26	0	4		1	4		3	0.268542	2	0	1	0	0	1	0	0	0	0	1	5	3	0	0	0	1	0	0	1	1	0	0	0	1	Bucket
NA_021_096_H	0	5	Nakichumet	6	Kanaura	21	Not applicable	0	NA_021_096	2	8	1	54	1	25	0	6	Sister-in-law	1	6	Sister-in-law	3	0.721107	2	0	1	0	0	1	1	0	1	0	1	5	3	0	0	0	0	1	0	1	1	0	0	0	0
NA_006_010_H	1	4	Kalokengel	2	Akwapuwa-Loluk	6	Lore Apakarengit	1	NA_006_010	1	9	2	46	2	25	0	4		1	4		3	0	1	1	1	0	0	0	0	0	0	0	0	4	2	0	0	0	1	0	0	1	1	0	0	0	0
NA_024_037_H	0	5	Nakichumet	6	Natirae A	24	Not applicable	0	NA_024_037	1	10	2	38	2	25	0	6	Step Son	1	1		1	0.835729	1	1	1	0	0	1	1	0	1	0	0	4	2	0	0	0	0	1	0	1	1	0	0	0	0
NA_023_015_H	0	11	Dirtics	1	Kotipe	23	Not applicable	0	NA_023_015	1	12	1	34	2	25	0	1		0	1		1	0.656218	1	1	1	0	0	1	1	0	0	0	0	5	3	0	0	0	0	1	0	1	1	0	0	0	1	Bucket
NA_017_005_H	0	4	Lomuno	4	Lopuu	17	Lore Lokiteded	1	NA_017_005	1	10	1	29	2	25	0	4		1	4		3	0.483278	1	1	1	0	0	1	0	1	0	0	1	4	2	0	0	0	1	0	0	1	1	0	0	0	0
NA_001_005_H	1	4	Kalokengel	2	Lobei	1	Lore Nakaao	1	NA_001_005	2	8	2	25	2	25	0	1		0	1		1	0	1	1	0	0	0	0	0	0	0	0	1	4	2	0	0	0	1	1	0	0	0	0	0	0	0
NA_005_039_H	1	4	Kalokengel	2	Nachuka	5	Lore Koopuwa	1	NA_005_039	1	8	2	25	2	25	0	1		0	1		1	0	1	1	1	0	0	0	0	0	0	0	0	4	2	0	0	0	0	1	0	1	1	0	0	0	0
NA_008_052_H	0	4	Moruongor	5	Naronit	8	Lore Ateko	1	NA_008_052	2	10	2	25	2	25	0	4		1	4		3	0	2	0	1	0	0	0	0	0	0	0	1	4	2	0	0	0	1	0	0	1	1	0	0	0	0
NA_009_014_H	0	4	Nariamaregae	7	Longaroi	9	Lore Angimiroo	1	NA_009_014	1	12	2	25	2	25	0	1		0	1		1	0.383165	1	1	1	0	0	1	0	0	0	0	1	4	2	0	0	0	1	0	0	1	1	0	0	0	1	Bucket
NA_009_057_H	1	4	Nariamaregae	7	Longaroi	9	Lore Aloteng	1	NA_009_057	2	11	2	25	2	25	0	1		0	1		1	0.448054	3	0	1	0	0	1	0	0	1	0	0	4	2	0	0	0	1	0	0	1	1	0	0	0	0
NA_010_041_H	0	4	Moruongor	5	Loolim	10	Not applicable	0	NA_010_041	2	8	2	25	2	25	0	1		0	1		1	0	3	0	0	0	0	0	0	0	0	0	1	4	2	0	0	0	1	0	0	1	1	0	0	0	0
NA_011_014_H	1	4	Lomuno	4	Adwaramukuny	11	Lore Alokikiya	1	NA_011_014	2	12	2	25	2	25	0	3		1	3		3	0.268542	3	0	0	0	0	1	0	0	0	0	1	4	2	0	0	0	1	0	0	1	1	0	0	0	0
NA_014_029_H	0	4	Moruongor	5	Naoi	14	Lore Aichongat	1	NA_014_029	2	10	2	25	2	25	0	1		0	1		1	0.448054	3	0	1	0	0	1	0	0	1	0	1	4	2	0	0	0	1	0	0	1	1	0	1	0	0
NA_017_008_H	0	4	Lomuno	4	Lopuu	17	Lore Lokiteded	1	NA_017_008	1	8	2	25	2	25	0	1		0	1		1	0.268542	3	0	1	0	0	1	0	0	0	0	0	4	2	0	0	0	1	0	0	0	0	0	0	0	0
NA_017_028_H	0	4	Lomuno	4	Lopuu	17	Lore Lokiteded	1	NA_017_028	2	8	2	25	2	25	0	1		0	1		1	0.273053	2	0	1	0	0	0	1	0	0	0	1	4	2	0	0	0	1	0	0	1	1	0	0	0	1	Bucket
NA_024_004_H	0	5	Nakichumet	6	Natirae A	24	Not applicable	0	NA_024_004	2	9	2	25	2	25	0	4		1	4		3	0.541595	1	1	1	0	0	1	1	0	0	0	0	5	3	0	0	0	0	1	0	1	1	0	0	0	0
NA_024_031_H	0	5	Nakichumet	6	Natirae A	24	Not applicable	0	NA_024_031	2	8	2	25	2	25	0	4		1	4		3	0.721107	1	1	0	0	0	1	1	0	1	0	0	5	3	0	0	0	0	1	0	1	1	0	0	0	1	Bucket
NA_024_041_H	0	5	Nakichumet	6	Natirae A	24	Not applicable	0	NA_024_041	2	9	2	25	2	25	0	4		1	4		3	0.273053	3	0	0	0	0	0	1	0	0	0	0	5	3	0	0	0	0	1	0	1	1	0	1	0	0
NA_025_042_H	0	5	Nakichumet	6	Natirae B	25	Not applicable	0	NA_025_042	2	8	2	25	2	25	0	3		1	3		3	0.656218	1	1	0	0	0	1	1	0	0	0	1	5	3	0	0	0	0	1	0	1	1	0	0	0	0
NA_025_021_H	0	5	Nakichumet	6	Natirae B	25	Not applicable	0	NA_025_021	2	13	2	25	2	25	0	4		1	4		3	0	1	1	0	0	0	0	0	0	0	0	1	4	2	0	0	0	0	1	0	1	1	0	0	0	0
NA_025_041_H	0	5	Nakichumet	6	Natirae B	25	Not applicable	0	NA_025_041	2	10	2	25	2	25	0	1		0	1		1	1.1235	1	1	0	1	0	1	1	0	1	0	1	4	2	0	0	0	0	1	0	1	1	0	0	0	0
NA_001_027_H	1	4	Kalokengel	2	Lobei	1	Lore alorot	1	NA_001_027	1	8	2	25	2	25	0	1		0	1		1	0	1	1	0	0	0	0	0	0	0	0	0	4	2	0	0	0	1	0	0	0	0	0	0	0	0
NA_005_061_H	1	4	Kalokengel	2	Nachuka	5	Lore Koopuwa	1	NA_005_061	2	12	1	25	1	25	0	4		1	4		3	0	1	1	1	0	0	0	0	0	0	0	0	4	2	0	0	0	0	1	0	1	1	0	0	0	0
NA_021_079_H	0	5	Nakichumet	6	Kanaura	21	Not applicable	0	NA_021_079	2	9	2	25	2	25	0	1		0	1		1	0.387676	1	1	1	0	0	0	1	0	0	0	0	5	3	0	0	0	1	0	0	1	1	0	0	0	0
NA_008_027_H	1	4	Moruongor	5	Naronit	8	Lore Abule	1	NA_008_027	1	8	2	25	2	25	0	4		1	4		3	0.268542	3	0	1	0	0	1	0	0	0	0	0	4	2	0	0	0	1	0	0	1	1	0	0	0	0
NA_019_022_H	0	4	Moruongor	5	Angaro	19	Lore Amoding	1	NA_019_022	2	9	2	25	2	25	0	1		0	1		1	0.268542	3	0	1	0	0	1	0	0	0	0	0	4	2	0	0	0	1	0	0	0	0	0	0	0	0
NA_007_007_H	1	4	Kalokengel	2	Angarab	7	Lore Aloyor	1	NA_007_007	1	8	2	25	2	25	0	1		0	1		1	0	1	1	1	0	0	0	0	0	0	0	0	4	2	0	0	0	0	1	0	1	1	0	0	0	0
NA_022_028_H	0	5	Nakichumet	6	Atedeoi	22	Not applicable	0	NA_022_028	2	11	2	76	2	24	1	4		1	2		2	0.268542	1	1	0	0	0	1	0	0	0	0	0	5	3	0	0	0	0	1	0	1	1	0	0	0	0
NA_016_035_H	1	4	Kalokengel	2	Lominit	16	Lore Apalopale	1	NA_016_035	1	10	2	53	2	24	0	4		1	1		1	0.268542	1	1	1	0	0	1	0	0	0	0	0	4	2	0	0	0	1	0	0	1	1	1	0	0	0
NA_017_040_H	1	4	Lomuno	4	Lopuu	17	Lore Lokiteded	1	NA_017_040	1	9	2	53	2	24	0	3		1	1		1	0.268542	1	1	1	0	0	1	0	0	0	0	0	4	2	0	0	0	1	0	0	1	1	0	0	0	0
NA_002_089_H	1	4	Kalokengel	2	Loroo	2	Lore Aloduk	1	NA_002_089	2	12	2	45	2	24	0	3		1	1		1	0.448054	1	1	1	0	0	1	0	0	1	0	1	4	2	0	0	0	1	0	0	1	1	0	0	0	0
NA_024_018_H	0	5	Nakichumet	6	Natirae A	24	Not applicable	0	NA_024_018	2	11	2	45	2	24	0	3		1	1		1	0.452564	1	1	1	0	0	0	1	0	1	0	1	4	2	0	0	0	0	1	0	1	1	0	0	0	0
NA_016_019_H	0	4	Kalokengel	2	Lominit	16	Lore Achuule	1	NA_016_019	2	13	2	45	2	24	0	3		1	1		1	0.556315	3	0	1	1	0	1	0	0	0	0	0	4	2	0	0	0	1	0	0	1	1	0	0	0	0
NA_010_024_H	0	4	Moruongor	5	Loolim	10	Not applicable	0	NA_010_024	2	12	2	42	2	24	0	3		1	1		1	0	1	1	0	0	0	0	0	0	0	0	1	4	2	0	0	0	1	0	0	1	1	0	0	0	0
NA_010_101_H	0	4	Moruongor	5	Loolim	10	Lore Alokoi	1	NA_010_101	1	10	1	37	2	24	0	4		1	1		1	0	1	1	0	0	0	0	0	0	0	0	0	4	2	0	0	0	1	0	0	1	1	0	0	0	0
NA_010_006_H	0	4	Moruongor	5	Loolim	10	Not applicable	0	NA_010_006	2	13	2	24	2	24	0	4		1	4		3	0.268542	1	1	0	0	0	1	0	0	0	0	1	4	2	0	0	0	1	0	0	1	1	0	0	0	0
NA_015_050_H	1	4	Moruongor	5	Naitakosowan	15	Lore Apaepela	1	NA_015_050	2	9	2	24	2	24	0	4		1	4		3	0.268542	1	1	0	0	0	1	0	0	0	0	1	6		0	0	0	1	0	0	0	0	0	0	0	0
NA_016_009_H	0	4	Moruongor	5	Lominit	16	Lore Apalopale	1	NA_016_009	1	13	2	24	2	24	0	4		1	4		3	0.268542	3	0	1	0	0	1	0	0	0	0	0	4	2	0	0	0	1	0	0	1	1	0	0	0	0
NA_020_018_H	0	5	Lokupoi	3	Lokupoi TC -Lokitela	20	Lore Alokai	1	NA_020_018	1	12	1	24	1	24	0	5		1	6	Cousin	3	0.735827	2	0	1	1	0	1	0	0	1	0	0	4	2	0	0	0	1	0	0	1	1	0	0	0	0
NA_021_012_H	0	5	Nakichumet	6	Kanaura	21	Not applicable	0	NA_021_012	1	14	2	24	2	24	0	1		0	1		1	0.114623	2	0	1	0	0	0	0	0	0	0	0	5	3	0	0	0	1	0	0	1	1	0	0	0	0
NA_021_072_H	0	5	Nakichumet	6	Kanaura	21	Not applicable	0	NA_021_072	2	8	2	24	2	24	0	1		0	1		1	0.268542	2	0	1	0	0	1	0	0	0	0	1	4	2	0	0	0	0	1	0	1	1	0	0	0	1	Bucket
NA_014_023_H	1	4	Moruongor	5	Naoi	14	Lore Keekwaputh	1	NA_014_023	2	9	2	24	2	24	0	4		1	4		3	0.268542	1	1	0	0	0	1	0	0	0	0	0	4	2	0	0	0	1	0	0	1	1	0	0	0	0
NA_005_031_H	1	4	Kalokengel	2	Nachuka	5	Lore Alotee	1	NA_005_031	1	8	2	24	2	24	0	1		0	1		1	0	1	1	1	0	0	0	0	0	0	0	0	4	2	0	0	0	0	1	0	1	1	0	0	0	0
NA_022_037_H	0	5	Nakichumet	6	Atedeoi	22	Not applicable	0	NA_022_037	1	10	2	24	2	24	0	1		0	1		1	0.114623	1	1	0	0	0	0	0	0	0	0	0	5	3	0	0	0	0	1	0	1	1	0	0	0	0
NA_001_035_H	1	4	Kalokengel	2	Lobei	1	Lore Kaabura	1	NA_001_035	2	9	2	24	2	24	0	4		1	4		3	0.268542	1	1	1	0	0	1	0	0	0	0	1	4	2	0	0	1	1	0	0	1	0	0	0	0	1	Bucket
NA_015_009_H	1	4	Moruongor	5	Naitakosowan	15	Lore Apakoela	1	NA_015_009	1	8	2	23	1	24	0	1		0	1		1	0.383165	2	0	1	0	0	1	0	0	0	0	1	4	2	0	0	0	1	0	0	1	1	0	0	0	0
NA_017_066_H	1	4	Lomuno	4	Lopuu	17	Lore Alokol	1	NA_017_066	1	8	2	53	2	23	0	4		1	2		2	0	1	1	1	0	0	0	0	0	0	0	0	4	2	0	0	0	0	1	0	0	0	0	0	0	0
NA_006_052_H	1	4	Kalokengel	2	Akwapuwa-Loluk	6	Lore Apakarengit	1	NA_006_052	2	10	1	50	2	23	0	1		0	1		1	0	1	1	1	0	0	0	0	0	0	0	1	4	2	0	0	0	1	0	0	1	1	0	0	0	0
NA_014_035_H	0	4	Moruongor	5	Naoi	14	Lore Aichongat	1	NA_014_035	1	13	1	25	2	23	0	1		0	1		1	0.383165	3	0	0	0	0	1	0	0	0	0	0	4	2	0	0	0	1	0	0	1	1	0	0	0	0
NA_008_011_H	1	4	Moruongor	5	Naronit	8	Lore Ateko	1	NA_008_011	2	9	2	23	2	23	0	1		0	1		1	0.114623	2	0	1	0	0	0	0	0	0	0	1	4	2	0	0	0	1	0	0	1	1	0	0	0	0
NA_010_040_H	1	4	Moruongor	5	Loolim	10	Not applicable	0	NA_010_040	1	12	1	23	1	23	0	4		1	4		3	0	2	0	1	0	0	0	0	0	0	0	0	4	2	0	0	0	1	0	0	1	1	0	0	0	1	Bucket
NA_010_111_H	0	4	Moruongor	5	Loolim	10	Lore Apalomwae	1	NA_010_111	1	8	2	23	2	23	0	1		0	1		1	0	1	1	1	0	0	0	0	0	0	0	1	4	2	0	0	0	1	0	0	1	1	0	0	0	0
NA_017_044_H	0	4	Lomuno	4	Lopuu	17	Lore Lokiteded	1	NA_017_044	1	10	2	23	2	23	0	1		0	1		1	0.448054	2	0	0	0	0	1	0	0	1	0	1	4	2	0	0	0	1	0	0	1	1	0	0	0	1	Bucket
NA_018_047_H	0	4	Moruongor	5	Kaingolejek	18	Lore Apameri	1	NA_018_047	2	8	2	23	2	23	0	1		0	1		1	0.268542	3	0	0	0	0	1	0	0	0	0	0	4	2	0	0	0	1	0	0	0	0	0	0	0	0
NA_021_022_H	0	5	Nakichumet	6	Kanaura	21	Not applicable	0	NA_021_022	2	12	2	23	2	23	0	1		0	1		1	0	1	1	0	0	0	0	0	0	0	0	0	5	3	0	0	0	1	0	0	1	1	0	0	0	0
NA_023_069_H	0	11	Dirtics	1	Kotipe	23	Not applicable	0	NA_023_069	2	10	2	23	2	23	0	4		1	4		3	0.656218	1	1	0	0	0	1	1	0	0	0	1	2	1	0	0	0	0	1	0	1	1	0	1	0	0
NA_024_024_H	0	5	Nakichumet	6	Natirae A	24	Not applicable	0	NA_024_024	2	13	2	23	2	23	0	6	Sister's Inlaw	1	6	Sister inlaw	3	0.835729	1	1	0	0	0	1	1	0	1	0	1	4	2	0	0	0	0	1	0	1	1	0	0	0	1	Bucket
NA_021_061_H	0	5	Nakichumet	6	Kanaura	21	Not applicable	0	NA_021_061	2	8	2	23	2	23	0	1		0	1		1	0.541595	2	0	1	0	0	1	1	0	0	0	0	5	3	0	0	0	0	1	0	1	1	0	0	0	0
NA_002_044_H	0	4	Kalokengel	2	Loroo	2	Lore Alorengeluka	1	NA_002_044	2	8	2	22	2	23	0	1		0	1		1	0.268542	1	1	1	0	0	1	0	0	0	0	1	4	2	1	0	0	0	1	0	1	1	0	0	0	0
NA_023_070_H	0	11	Dirtics	1	Kotipe	23	Not applicable	0	NA_023_070	1	11	2	50	2	22	0	3		1	1		1	0.268542	1	1	1	0	0	1	0	0	0	0	0	5	3	0	0	0	0	1	0	1	1	0	0	0	0
NA_019_030_H	0	4	Moruongor	5	Angaro	19	Lore Amoding	1	NA_019_030	2	10	1	25	2	22	0	4		1	4		3	0	1	1	1	0	0	0	0	0	0	0	0	4	2	0	0	0	1	0	0	1	1	0	0	0	0
NA_024_049_H	0	5	Nakichumet	6	Natirae A	24	Not applicable	0	NA_024_049	2	8	1	24	2	22	0	1		0	3		3	0.541595	3	0	0	0	0	1	1	0	0	0	0	4	2	0	0	0	0	1	0	1	1	0	0	0	0
NA_002_083_H	1	4	Kalokengel	2	Loroo	2	Lore Aichumar	1	NA_002_083	1	10	2	22	2	22	0	4		1	6	aunt	3	0.735827	1	1	1	1	0	1	0	0	1	0	1	4	2	1	0	0	1	0	0	1	1	0	0	0	0
NA_004_004_H	1	4	Lomuno	4	Naoyaminit	4	Lore Aporengereng	1	NA_004_004	2	12	2	22	2	22	0	1		0	1		1	0	3	0	1	0	0	0	0	0	0	0	1	4	2	0	0	0	1	0	0	1	1	0	0	0	0
NA_006_014_H	0	4	Kalokengel	2	Akwapuwa-Loluk	6	Lore Alotimong	1	NA_006_014	2	8	2	22	2	22	0	4		1	4		3	0.448054	3	0	1	0	0	1	0	0	1	0	1	5	3	0	0	0	0	1	0	1	1	0	0	0	0
NA_007_020_H	1	4	Kalokengel	2	Angarab	7	Lore Aloyor	1	NA_007_020	2	8	2	22	2	22	0	1		0	1		1	0	1	1	1	0	0	0	0	0	0	0	1	4	2	0	0	0	0	1	0	1	1	0	0	0	0
NA_009_081_H	0	4	Nariamaregae	7	Longaroi	9	Lore Kaamunyinakori	1	NA_009_081	2	8	2	22	2	22	0	4		1	4		3	0	1	1	0	0	0	0	0	0	0	0	1	5	3	0	0	0	1	0	0	1	1	0	0	0	0
NA_011_016_H	1	4	Lomuno	4	Adwaramukuny	11	Lore Alonges	1	NA_011_016	2	9	2	22	2	22	0	3		1	3		3	0.268542	3	0	0	0	0	1	0	0	0	0	0	4	2	0	0	0	1	0	0	1	1	0	0	0	1	Watering can
NA_021_006_H	0	5	Nakichumet	6	Kanaura	21	Not applicable	0	NA_021_006	2	12	2	22	2	22	0	3		1	3		3	0	1	1	1	0	0	0	0	0	0	0	0	5	3	0	0	0	1	0	0	1	1	0	0	0	0
NA_023_044_H	0	11	Dirtics	1	Kotipe	23	Not applicable	0	NA_023_044	2	8	2	22	2	22	0	1		0	3		3	0.656218	3	0	1	0	0	1	1	0	0	0	0	2	1	0	0	0	0	1	0	1	1	0	0	0	0
NA_021_058_H	0	5	Nakichumet	6	Kanaura	21	Not applicable	0	NA_021_058	2	10	2	22	2	22	0	4		1	4		3	0	2	0	1	0	0	0	0	0	0	0	0	5	3	0	0	0	1	0	0	1	1	0	0	0	0
NA_015_011_H	0	4	Moruongor	5	Naitakosowan	15	Lore Apangaari	1	NA_015_011	1	8	1	32	2	21	0	1		0	1		1	0.268542	3	0	1	0	0	1	0	0	0	0	0	4	2	0	0	0	1	0	0	1	1	0	0	0	0
NA_017_018_H	0	4	Lomuno	4	Lopuu	17	Lore Lokiteded	1	NA_017_018	2	8	2	21	2	21	0	3		1	3		3	0.721107	1	1	1	0	0	1	1	0	1	0	1	4	2	0	0	0	1	0	0	1	1	0	0	0	0
NA_022_001_H	0	5	Nakichumet	6	Atedeoi	22	Not applicable	0	NA_022_001	2	13	1	21	1	21	0	3		1	3		3	0.383165	1	1	1	0	0	1	0	0	0	0	0	4	2	0	1	0	0	1	0	1	1	0	0	0	1	Bucket
NA_023_043_H	0	11	Dirtics	1	Kotipe	23	Not applicable	0	NA_023_043	2	8	2	21	2	21	0	4		1	4		3	0.387676	1	1	1	0	0	0	1	0	0	0	1	5	3	0	0	0	0	1	0	1	1	0	1	0	1	Bucket
NA_010_078_H	0	4	Moruongor	5	Loolim	10	Not applicable	0	NA_010_078	2	11	2	21	2	21	0	1		0	1		1	0.268542	1	1	1	0	0	1	0	0	0	0	0	4	2	0	0	0	1	0	0	1	0	1	0	0	0
NA_022_026_H	0	5	Nakichumet	6	Atedeoi	22	Not applicable	0	NA_022_026	1	13	2	52	2	20	0	3		1	1		1	0	1	1	0	0	0	0	0	0	0	0	0	5	3	0	0	0	0	1	0	0	0	0	0	0	0
NA_024_025_H	0	5	Nakichumet	6	Natirae A	24	Not applicable	0	NA_024_025	2	13	2	47	2	20	0	3		1	3		3	0.383165	1	1	1	0	0	1	0	0	0	0	1	5	3	0	0	0	0	1	0	1	1	0	1	0	0
NA_013_084_H	1	4	Lomuno	4	Nakaramwae	13	Lore Amerinyang	1	NA_013_084	1	8	2	46	2	20	0	4		1	2		2	0.448054	3	0	1	0	0	1	0	0	1	0	0	4	2	0	0	0	0	1	0	1	1	0	0	0	0
NA_012_030_H	0	4	Kalokengel	2	Naitakwae	12	Lore Apalotuko	1	NA_012_030	2	8	2	45	2	20	0	4		1	4		3	0	1	1	1	0	0	0	0	0	0	0	1	4	2	0	0	0	0	1	0	1	1	0	0	0	0
NA_021_088_H	0	5	Nakichumet	6	Kanaura	21	Not applicable	0	NA_021_088	2	10	1	30	2	20	0	4		1	4		3	0.556315	2	0	1	1	0	1	0	0	0	0	1	4	2	0	0	0	1	0	0	1	1	0	0	0	0
NA_024_027_H	0	5	Nakichumet	6	Natirae A	24	Not applicable	0	NA_024_027	1	9	1	25	2	20	0	1		0	1		1	0.721107	1	1	1	0	0	1	1	0	1	0	0	5	3	0	0	0	0	1	0	1	1	0	0	0	1	Bucket
NA_023_060_H	0	11	Dirtics	1	Kotipe	23	Not applicable	0	NA_023_060	1	11	2	20	2	20	0	4		1	4		3	0.268542	1	1	0	0	0	1	0	0	0	0	1	2	1	0	0	0	0	1	0	1	1	0	0	0	0
NA_002_061_H	0	4	Kalokengel	2	Loroo	2	Lore Aichumar	1	NA_002_061	1	14	2	52	2	19	0	3		1	2		2	1.00888	1	1	1	1	0	1	1	0	1	0	1	4	2	1	0	0	0	1	0	1	1	0	0	0	0
NA_024_048_H	0	5	Nakichumet	6	Natirae A	24	Not applicable	0	NA_024_048	1	11	2	45	2	19	0	6	Sister inlaw	1	1		1	0.829368	1	1	0	1	0	1	1	0	0	0	1	4	2	0	0	0	0	1	0	1	1	0	0	0	0
NA_011_012_H	1	4	Lomuno	4	Adwaramukuny	11	Lore Angikatap	1	NA_011_012	1	8	2	35	2	19	0	4		1	1		1	0	1	1	1	0	0	0	0	0	0	0	1	4	2	0	0	0	1	0	0	1	1	0	0	0	0
NA_015_040_H	0	4	Moruongor	5	Naitakosowan	15	Lore Apaepela	1	NA_015_040	2	13	2	32	2	19	0	4		1	1		1	0.268542	1	1	0	0	0	1	0	0	0	0	0	4	2	0	0	0	1	0	0	1	1	0	0	0	0
NA_022_027_H	0	5	Nakichumet	6	Atedeoi	22	Not applicable	0	NA_022_027	2	10	2	32	2	19	0	3		1	1		1	0	3	0	1	0	0	0	0	0	0	0	0	5	3	0	0	0	0	1	0	0	0	0	0	0	0
NA_010_042_H	0	4	Moruongor	5	Loolim	10	Not applicable	0	NA_010_042	1	12	1	22	2	18	0	3		1	3		3	0	1	1	0	0	0	0	0	0	0	0	0	4	2	0	0	0	1	0	0	1	1	0	0	0	0
NA_010_051_H	0	4	Moruongor	5	Loolim	10	Not applicable	0	NA_010_051	1	12	2	18	2	18	0	4		1	4		3	0	2	0	0	0	0	0	0	0	0	0	0	4	2	0	0	0	1	0	0	1	1	0	0	0	1	Basin
NA_011_007_H	1	4	Lomuno	4	Adwaramukuny	11	Lore Angikatap	1	NA_011_007	2	8	2	30	1		0	2		1	1		1	0.850449	1	1	1	1	0	1	0	0	1	0	1	4	2	0	0	0	1	0	0	1	1	0	0	0	0
NA_021_068_H	0	5	Nakichumet	6	Kanaura	21	Not applicable	0	NA_021_068	2	8	2		2			1		0	1		1	0	3	0	1	0	0	0	0	0	0	0	0	5	3	0	0	0	1	0	0	1	1	0	0	0	0
[truncated: 112 more columns]

## Sheet: codebook
Variables	details	type	categories
HH_id	household unique identifier	numeric,mixed
HH_group_1case_0control	study group	categorical	0: control, 1: case
hh_sub_county_id	sub-county	categorical	4: lotome, 5: matany, 11:Lokiteded T/C
hh_parish	parish name	character
hh_parish_code	parish identifier	categorical	1:Dirtics, 2: Kalokengel, 3: Lokupi, 4: Lomuno, 5: Moruongor, 6: Nakichumet, 7:Nariamaregae
village_name	name of village	character
village_id	village identifier	integer
hh_mannyatta_name	name of manyatta	character
HH_in_manyatta	household is located within a manyatta	categorical	0: no, 1: yes
Pupil_id	index child identifier	numeric,mixed
sex_index_child	sex of index child	categorical	1: male, 2: female
indexchild_age	age of the index child, years	numeric
sex_hhd	sex of household head	categorical	1: male, 2: female
age_hhd	age of household head, years	numeric
sex_caregiver	sex of caregiver	categorical	1: male, 2: female
age_caregiver	age of caregiver, years	numeric
adult_over_60_in_hh	household has an adult over 60 years	categorical	0: no, 1: yes
respondent_relation_index_child	relationship of respondent to index child	categorical	1: parent, 2: grandparent, 3: sibling, 4: aunt/uncle, 5: cousin, 6: other
other_respondent_relation	other relationship	character
respondent_relation_index_recode	relationship of respondent to index child-recoded	categorical	0: parent, 1: other
indexchild_reln_hhd	relationship of index child to head of household	categorical	1: child, 2: grandchild, 3: sibling, 4:niece/nephew, 5: adopted orphan, 6:other
other_relation_hhd	other relationship to head of household	character
indexchild_rel_HHH_recode	relationship of index child to head of household_recoded	categorical	1: child, 2: grandchild, 3:other
SES	socioeconomic status	numeric
land_status	household owns the house they live in	categorical	1: yes, 2: no its rented, 3: no squatting, 4: other
land_status_recode	household owns the house they live in_recoded	categorical	0: no, 1: yes
own_farming_land	household owns other land	categorical	0: no, 1: yes
radio	household owns a radio	categorical	0: no, 1: yes
tv	household owns a tv	categorical	0: no, 1: yes
mobile_phone	household owns a mobile phone	categorical	0: no, 1: yes
bicycle	household owns a bicycle	categorical	0: no, 1: yes
motor_cycle	household owns a motor cycle	categorical	0: no, 1: yes
solar	household owns a solar lamp	categorical	0: no, 1: yes
vehicle	household owns a car, tractor or boat	categorical	0: no, 1: yes
brew_alcohol_atHH	alcohol is brewed at home	categorical	0: no, 1: yes
water_source	main source of water	categorical	1: tap in own compound, 2: shared community tap, 3: own well, 4: shared community well or borehole, 5: river/ lake/pond, 6: rainwater collection, 7: combination, 8: other
water_source_recode	main source of water_recoded	categorical	1: own tap or well, 2: shared community well or borehole, 3: river/ lake/pond
mode_to_collect_water___1	pay for water	categorical	0: no, 1: yes
mode_to_collect_water___2	Some or all of thewater needed isbrought by a hiredmotorbike.	categorical	0: no, 1: yes
mode_to_collect_water___3	Some or all of thewater needed isbrought by a hireddonkey cart.	categorical	0: no, 1: yes
mode_to_collect_water___4	Some or all of thewater needed isfetched byhousehold membersfrom a shortdistance	categorical	0: no, 1: yes
mode_to_collect_water___5	Some or all of thewater needed isfetched byhousehold membersfrom a longdistance.	categorical	0: no, 1: yes
mode_to_collect_water___6	None of aboveapplies.	categorical	0: no, 1: yes
water_storage_cont	household owns water storage containers	categorical	0: no, 1: yes
water_storage___1	store water in jerrycans	categorical	0: no, 1: yes
water_storage___2	store water in pots	categorical	0: no, 1: yes
water_storage___3	store water in drums	categorical	0: no, 1: yes
water_storage___4	store water in cooking utensils	categorical	0: no, 1: yes
water_storage___5	other	categorical	0: no, 1: yes
oth_water_sto_cont	other water storage	character
jerricans_water_used_daily	number of jerrycans of water used daily	numeric
jerrycanswater_code	number of jerrycans of water used daily-coded	categorical	1:0.5-1.5, 2: 2-3, 3: >3
bathing_place	location used for bathing	categorical	1: in river/pond/lake, 2: with basin of water anywhere on compound/inthe bushes/garden nearby, 3: built bathroom/latrine building, 4: makeshift bathroom, 5: other
other_bathing_place	other bathing place	character
bathing_place_recode	location used for bathing-recoded	categorical	0: built bathroom/latrine building, 1: with basin of water anywhere on compound/inthe bushes/garden nearby, 2: makeshift bathroom
caregiver_bathe_feet	frequency caregiver bathes own feet	categorical	1: twice a day, 1: once a day, 3: less often
caregiver_bathe_freq_recode	frequency caregiver bathes own feet-recode	categorical	1: twice a day, 2: less often
caregiver_use_soap_feet	caregiver uses soap to bathe feet	categorical	1: no, 2: sometimes, 3: always
caregiver_soapuse_recode	caregiver uses soap to bathe feet-recoded	categorical	1: always, 2: not always
reason_caregiver_no_soap	reason for not always using soap	categorical	1: Cost/lack of resources, 2: It is not important, 3: other
other_reasons_no_soap	other reasons	character
toilet_used	toilet type used	categorical	1: flush toilet, 2: ventilated pit latrine, 3: traditional latrine, 4: bush/open defecation
toilet_recode	toilet type recoded	categorical	0: any latrine type, 1: bush/open defecation
waste_disposal	solid waste disposal method used	categorical	1:open/roadside/in the garden/bush/farm, 2: collected in pit, 3: collected and burned, 4: other
other_waste_disposal	other method for waste disposal	character
wastedisposal_recode	solid waste disposal method -recoded	categorical	1: discarded anywhere, 2: in a pit, 3: collected & burned
numb_meals_ate_yesterday	number of meals the household ate the previous day	numeric
numb_mealsyest_recode	number of meals the household ate the previous day-coded	categorical	1: 0-1, 2: 2-3
grow_own_food	household grows the food they eat	categorical	0: no, 1: yes
indexchild_disabilities	index child had disabilities	categorical	0: none, 1: physical, 2: mental, 3: both
index_disability_recode	index child had disabilities-recoded	categorical	0: no, 1: yes
indexchild_illnes___1	index child current other illness-none	categorical	0: no, 1: yes
indexchild_illnes___2	index child current other illness-Respiratory, chest, cough, nose	categorical	0: no, 1: yes
indexchild_illnes___3	index child current other illness-diarrhea, stomach	categorical	0: no, 1: yes
indexchild_illnes___4	index child current other illness-skin	categorical	0: no, 1: yes
indexchild_illnes___5	index child current other illness-eye	categorical	0: no, 1: yes
indexchild_illnes___6	index child current other illness-ear	categorical	0: no, 1: yes
indexchild_illnes___7	index child current other illness-headache	categorical	0: no, 1: yes
indexchild_illnes___8	index child current other illness-fever/malaria	categorical	0: no, 1: yes
indexchild_illnes___9	index child current other illness-other	categorical	0: no, 1: yes
indexchild_other_illness	other current illness	character
frequency_youngchild_bath	frequency caregiver bathed younger children	categorical	1:twice a day, 2: once a day, 3: not every day, 4: never
age_stop_bathing_child	age caregiver stops bathing children, years	numeric
age_stop_bathing_child_recode	age caregiver stops bathing children-coded	categorical	1: 3-5, 2: 6-10, 3: 11-15 years
supervise_indexchild_bathe	does anyone supervise index child to bathe	categorical	0: no, 1: yes, 3: don't know
indexchild_bathe_frequency	frequency index child bathes feet	categorical	1:twice a day, 2: once a day, 3: not every day, 4: never, 5: don't know
indexchild_bathe_freq_recode	frequency index child bathes feet-recoded	categorical	1:twice a day, 2: less often, 3: don't know
indexchild_soap_use	index child uses soap to bathe feet	categorical	0: never, 1: sometimes, 2: always, 3: don't know
indexchild_soapuse_recode	index child uses soap to bathe feet-recoded	categorical	1: not always, 2: always, 3: don't know
time_spend_talking_indexchild	time caregiver spent talking to index child each day	categorical	1: none, 2: a little, 3: some, 4: a lot
time_spend_talking_recode	time caregiver spent talking to index child each day-recoded	categorical	1: none or a little, 2: some or a lot
hug_indexchild	caregiver hugged/cuddled the index child	categorical	0: no, 1: yes
often_hug_indexchild	how often caregiver hugged child each day	categorical	1: severeal times a day, 2: once a day, 3: not every day
discipine_methods	action taken last time index child did something wrong	categorical	1: nothing, 2: beat child, 3: talked calmly about mistake, 4: sent away/ sit on own, 4: shouted at child, 5: other
other_discipline_methods	other action taken	character
discipline_recode	action taken last time index child did something wrong-recoded	categorical	0: beat child, 1: other action
know_childs_friends	caregiver knew the friends of index child	categorical	0: no, 1: yes
know_childs_fiends_parents	caregiver knew the parents of index child's friends	categorical	0: no, 1: yes
numb_adlts_in_hh	number of adults in the household	numeric
HHnumb_adult_code	number of adults in the household-coded	categorical	0: 1-2, 1: >2
numb_kids_blw_5yrs	number of children aged under 5 years in the household	numeric
HHnumb_under5_code	number of children aged under 5 years in the household-coded	categorical	0: 0, 1: 1-2, 3: >2
numb_kids_btwn_6_17yrs	number of children aged 6-17 years in the household	numeric
HHnumb_6to17_code	number of children aged 6-17 years in the household-coded	categorical	0:1-2, 1: >2
family_size	total number of family members	numeric
hh_in_homestead_structure	household is within a homestead with other households	categorical	0: no, 1: yes
other_hh_wth_jiggers	other households in the homestead have tungiasis	categorical	0: no, 1: yes
nbr_hh_affected	number of other households have tungiasis	numeric
numb_chld_affected	number of children infected in the other households	numeric
numb_adults_affected	number of adults infected in the other households	numeric
hhd_structures___1	household has a main house	categorical	0: no, 1: yes
hhd_structures___2	household has a separate kitchen building	categorical	0: no, 1: yes
hhd_structures___3	household has a separate sleeping hut for teenagers	categorical	0: no, 1: yes
numb_sleeping_areas_main_hse	number of sleeping areas in the main house	numeric
specify_sleep_area___1	sleeping area/room-adults only	categorical	0: no, 1: yes
specify_sleep_area___2	sleeping area/room-mixed adults & children	categorical	0: no, 1: yes
specify_sleep_area___3	sleeping area/room-children mixed girls & boys	categorical	0: no, 1: yes
specify_sleep_area___4	sleeping area/room-boys only	categorical	0: no, 1: yes
specify_sleep_area___5	sleeping area/room-girls only	categorical	0: no, 1: yes
specify_sleep_area___6	sleeping area/room-grandparents only	categorical	0: no, 1: yes
specify_sleep_area___7	sleeping area/room-grandparent & children	categorical	0: no, 1: yes
specify_sleep_area___8	sleeping area/room-lounge	categorical	0: no, 1: yes
specify_sleep_area___9	sleeping area/room-other	categorical	0: no, 1: yes
numb_adults_slp_main_house	number of adults sleep in mainhouse	numeric
adultsmain_coded	number of adults sleep in mainhouse-coded	categorical	1: 1-2, 2: >2
floor_adults_sleep	floor material of adults' room	categorical	1: hard clay, 2: loose soil, 3: other
numb_chld_sleep_main_hse	number of children sleep in mainhouse	numeric
childslpmain_code	number of children sleep in mainhouse-coded	categorical	1: 1-2, 2: >2
kidsfloormainhse	floor material of children's room	categorical	1: hard clay, 2: loose soil, 3: other
wall_material_main_hse	wall material of the main house	categorical	1: permanent stone or brick, 2: semi-permanent mud/cement or mud/stone, 3: mud, 4: palm leaves/grass/matt/sticks, 5: other
oth_wall_mtrl_main_hse	other material	character
mainwall_recode	wall material of the main house-recoded	categorical	1: sticks/leaves/mud, 2: Mud/mixed mud & stone, 3: Stone/ bricks /other
roof_main_house	roof material of main house	categorical	1: tiles, 2: iron sheets, 3: thatch (dry vegetation e.g grass, palm leaves etc), 4: other
repair_main_houe	state of repair of the main house	categorical	1: good, 2: poor, 3: very poor (holes in walls & roof)
sanitation_main_hse	state of sanitation/cleanliness of main house	categorical	1: swept & clean, 2: not swept, items scattered throughout, 3: other
index_child_sleep_place	the sleeping place of the index child	categorical	2: mixed adults & children, 3: mixed girls & boys, 4: boys only room, 5: girls only room, 7: with grandparents, 8: lounge, 9: other
othr_sleep_plc_ind_chld
indexchild_sleep_pl_recode	the sleeping place of the index child-recoded	categorical	1: mixed adults & children, 2: children only, 3: with grandparents, 4: children's hut, 5: other hut
indexchild_share_room_othr_child	index child shares room with other children	categorical	0: no, 1: yes
other_chld_sharing_hv_jigrs	those other children have jiggers	categorical	0: no, 1: yes
nmb_chld_with_jgrs	number of children who have jiggers	numeric
indexchil_sleep_raise_structure	index child sleeps on a raised structure	categorical	0: no, 1: yes
what_chld_sleep_on	surface the index child slept on	categorical	1: mattress, 2: rugs/old sheets/mosquito nets, 3: reed mats, 4: nothing (bare frame or fl oor)
indexchild_sleep_place_sanitation	state of sanitation/cleanliness of main house	categorical	1: swept & clean, 2: not swept, items scattered throughout, 3: other
other_ind_chld_slp_plc_sanitation	other state of sanitation	character
indexchild_organic_matter_in_room	organic matter on the floor of the room of index child	categorical	0: no, 1: yes
floorindexsleep_code	floor material of index child's sleeping room	categorical	1: hard clay, 2: loose soil, 3: other
indexchild_weight_for_age	index child's weight for age	numeric
indexchild_height_for_age	index child's height for age	numeric
indexchild_wasted	index child wasted	categorical	0: no, 1: yes
indexchild_stunted	index child stunted	categorical	0: no, 1: yes
Indexchild_INFECTN_INTENS	infected index child, number of embedded fleas	numeric
Indexchild_INTENSITY_GROUP	infected index child, disease severity	categorical	0: no infection, 2: mild (1-10 fleas), 3: severe (>10 fleas)
adult_id	caregiver/ head of household unique identifier	numeric,mixed
adult_religion	religion of family	categorical	1: muslim, 2: christian, 3: traditionist, 4: none, 5: other
adult_disability	caregiver/ head of household disability	categorical	0: none, 1: physical, 2: mental, 3: both
adult_disability_recode	caregiver/ head of household disability-recoded	categorical	0: no, 1: yes
adult_educ	caregiver/ head of household education level	categorical	0: none, 1: some
adult_marital	caregiver/ head of household marital status	categorical	0: married, 1: not married
adult_occupation	caregiver/ head of household occupation	categorical	0: none, 1: casual labour, 2: Farming (crops or livestock), 3: Selling goods (food, alcohol etc), 4: employed or other
adult_alcohol_use	caregiver/ head of household drinks alcohol	categorical	1: every day, 2: a few times a week, 3: once a week, 4: less, 5: never
adult_alcoholuse_recode	caregiver/ head of household drinks alcohol-recoded	categorical	0: no, 1: yes
